# Supplementary material for: An intramolecularly self-templated synthesis of macrocycles: self-filling effects on the formation of prismarenes
Source: Royal Society of Chemistry journal article supplement (doi:10.1039/d1sc02199k), 2021-01-01
Supplement: d1sc02199k1.pdf [file d1sc02199k1.pdf]

## Supplementary Information

### An Intramolecularly Self-Templated Synthesis of Macrocycles: The Self-Filling Effects on the Formation of Prismarenes

Paolo Della Sala,<sup>[a],‡</sup> Rocco Del Regno,<sup>[a],‡</sup> Luca Di Marino,<sup>[a]</sup> Carmela Calabrese,<sup>[a]</sup> Carmine Palo,<sup>[a]</sup> Carmen Talotta,<sup>[a]</sup> Silvano Geremia,<sup>\*,[b]</sup> Neal Hickey,<sup>[b]</sup> Amedeo Capobianco,<sup>[a]</sup> Placido Neri<sup>[a]</sup> and Carmine Gaeta<sup>\*,[a]</sup>

| Table of Contents                                                                                                                                                                                                                                                                                             | Pages     |
|---------------------------------------------------------------------------------------------------------------------------------------------------------------------------------------------------------------------------------------------------------------------------------------------------------------|-----------|
| General Experimental Details                                                                                                                                                                                                                                                                                  | S2        |
| General procedure for the synthesis of Prism[n]arenes PrS[n] <sup>R</sup>                                                                                                                                                                                                                                     | S2-S5     |
| Copies of 1D and 2D NMR and HR Mass Spectra of PrS[n] <sup>R</sup>                                                                                                                                                                                                                                            | S6-S34    |
| Copies of NMR titration experiments with reaction solvents                                                                                                                                                                                                                                                    | S35-S41   |
| Copies of 1D and 2D of PrS[n] <sup>R</sup> Complexes                                                                                                                                                                                                                                                          | S42-S51   |
| <sup>1</sup> H NMR determination of K <sub>ass</sub> values.                                                                                                                                                                                                                                                  | S52-S75   |
| Fluorescence Titration                                                                                                                                                                                                                                                                                        | S76       |
| DFT Calculations                                                                                                                                                                                                                                                                                              | S77-S94   |
| DFT - optimized structures of Complexes                                                                                                                                                                                                                                                                       | S95-S138  |
| NBO and NCI analysis                                                                                                                                                                                                                                                                                          | S139-S142 |
| Determination of crystallographic structures of prismarenes: PrS[5] <sup>Et</sup> , PrS[5] <sup>nPr</sup> , PrS[6] <sup>Et</sup> and PrS[6] <sup>nPr</sup> and prismarenes host-guest complexes: 7@PrS[5] <sup>Me</sup> ·(BArF) <sub>2</sub> , 10@PrS[5] <sup>Me</sup> ·BArF and 6@PrS[6] <sup>Me</sup> ·BArF | S143-156  |
| Potential void volumes of prismatic macrocycles.                                                                                                                                                                                                                                                              | S157      |
| Comparison between DFT and Crystallographic Structures of PrS[5] <sup>nPr</sup> and PrS[6] <sup>nPr</sup>                                                                                                                                                                                                     | S158      |
| HPLC analysis of the cyclocondensation kinetics                                                                                                                                                                                                                                                               | S159      |

## General Experimental Details

HR MALDI mass spectra were recorded on a Bruker Solarix FT-ICR mass spectrometer equipped with a 7T magnet. All samples were recorded in MALDI (4 laser shots were used for each scan) and they were prepared by mixing 10  $\mu\text{L}$  of analyte in dichloromethane (1 mg/mL) with 10  $\mu\text{L}$  of solution of 2,5-dihydroxybenzoic acid (10 mg/mL in Metanol). The mass spectra were calibrated externally, and a linear calibration was applied. 1,2-dichloroethane was dried by heating under reflux over calcium hydride. All chemicals reagents grade was used without further purification and were used as purchased by Merck, TCI and Fluorochem. Reaction temperatures were measured externally. Reactions were monitored by Merck TLC silica gel plates (0.25 mm) and visualized by UV light 254 nm, or by spraying with  $\text{H}_2\text{SO}_4\text{-Ce}(\text{SO}_4)_2$ . NMR spectra were recorded on a Bruker Avance-600 [600 ( $^1\text{H}$ ) and 150 MHz ( $^{13}\text{C}$ )], Avance-400 [400 ( $^1\text{H}$ ) and 100 MHz ( $^{13}\text{C}$ )], Avance-300 MHz [300 ( $^1\text{H}$ ) and 75 MHz ( $^{13}\text{C}$ )] or Avance-250 MHz [250 ( $^1\text{H}$ ) and 62.5 MHz ( $^{13}\text{C}$ )] spectrometers. Chemical shifts are reported relative to the residual solvent peak<sup>1</sup>. Standard pulse programs, provided by the manufacturer, were used for 2D COSY-45, 2D HSQC and 2D NOESY experiments.

## General procedure for the synthesis of Prism[n]arenes $\text{PrS}[n]^R$ .

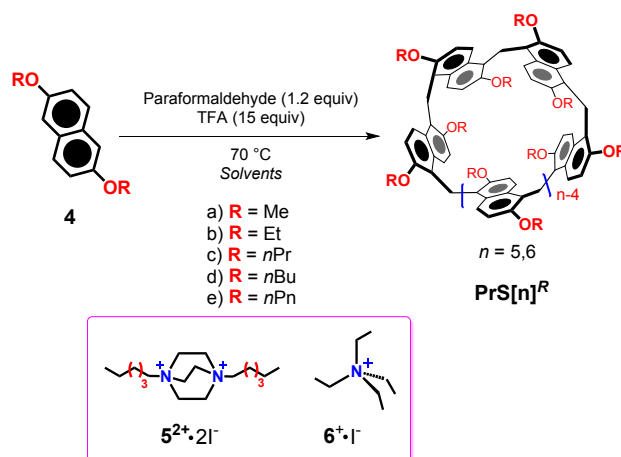

A solution of 2,6-dialkoxyphenylene **4b-e**, paraformaldehyde (1.2 equiv) in appropriate solvent (Table S1, 5.0 mM) was heated at 70 °C, then trifluoroacetic acid (15 equiv) was added and the solution was stirred at 70 °C for the time indicated in Table S1. Then, an aqueous saturated solution of  $\text{NaHCO}_3$  (100 mL) was added in the reaction mixture and the organic layer was extracted. Finally, the organic phase was dried on  $\text{Na}_2\text{SO}_4$  and concentrated to give a light brown solid.

- Starting by 2,6-diethoxyphenylene **4b** (250 mg, 1.2 mmol): The crude was purified through chromatographic column on silica gel (only dichloromethane) to give the macrocycle  $\text{PrS}[6]^{\text{Et}}$  as white solid (see Table S1).

<sup>1</sup> G. R. Fulmer, A. J. M. Miller, N. H. Sherden, H. E. Gottlieb, A. Nudelman, B.M. Stoltz, J.E. Bercaw, K.I. Goldberg, *Organometallics* 2010, **29**, 2176–2179.

- Starting by 2,6-dipropoxynaphthalene **4c** (250 mg, 1.0 mmol): The crude was purified through chromatographic column on silica gel (*n*-hexane/dichloromethane = 1/1) to give the macrocycle **PrS[6]<sup>nPr</sup>** as white solid (see Table S1).
- Starting by 2,6-dibutoxynaphthalene **4d** (300 mg, 1.1 mmol): The crude was purified through chromatographic column on silica gel (*n*-hexane/dichloromethane = 4/6) to give the macrocycle **PrS[6]<sup>nBu</sup>** as white solid (see Table S1).
- Starting by 2,6-dipentoxynaphthalene **4e** (300 mg, 1.0 mmol): The crude was purified through chromatographic column on silica gel (*n*-hexane/dichloromethane = 6/4) to give the macrocycle **PrS[6]<sup>nPn</sup>** as white solid (see Table S1).

**Table S1**

| Solvent     | Monomer   | Time   | PrS[6] <sup>R</sup> (%) |
|-------------|-----------|--------|-------------------------|
| Cl-CyHex    | <b>4b</b> | 40 min | 71                      |
| Cl-CyHex    | <b>4c</b> | 2 h    | 64                      |
| Toluene     | <b>4b</b> | 3 h    | 74                      |
| Toluene     | <b>4c</b> | 8 h    | 57                      |
| Cyclohexane | <b>4b</b> | 30 min | 76                      |
| Cyclohexane | <b>4c</b> | 40 min | 65                      |
| Decaline    | <b>4b</b> | 30 min | 75                      |
| Decaline    | <b>4c</b> | 45 min | 70                      |
| 1,2-DCE     | <b>4b</b> | 45 min | 75                      |
| 1,2-DCE     | <b>4c</b> | 90 min | 65                      |
| 1,2-DCE     | <b>4d</b> | 40 min | 30                      |
| 1,2-DCE     | <b>4e</b> | 45 min | 8                       |

### Quaternary ammonium-templated synthesis.

#### Templated synthesis in presence of **6<sup>+</sup>I<sup>-</sup>** salt:

In a solution of 2,6-dialkoxynaphthalene **4b-c** in 1,2-dichloroethane (5 mM) was added paraformaldehyde (1.2 equiv) and the templating agent **6<sup>+</sup>I<sup>-</sup>** (1.0 equiv). The mixture was heated at 70° C and then trifluoroacetic acid (15 equiv) was added. The solution was stirred for 22 h at 70 °C and subsequently the solvent was evaporated under reduced pressure. The residue was dissolved in CH<sub>2</sub>Cl<sub>2</sub> (30 mL) and the mixture was washed with an aqueous saturated solution of NaHCO<sub>3</sub> (30 mL). Finally, the organic layer was washed with a 10 % aqueous solution of sodium thiosulfate (100 mL), and the organic phase was dried on Na<sub>2</sub>SO<sub>4</sub> and concentrated to give a light brown solid.

- Starting by 2,6-diethoxynaphthalene **4b** (250 mg, 1.2 mmol): The crude was purified through chromatographic column on silica gel (only dichloromethane) to give the macrocycle **PrS[6]<sup>Et</sup>** as white solid (162 mg, 60 %).

- Starting by 2,6-dipropoxynaphthalene **4c** (250 mg, 1.0 mmol): The crude was purified through chromatographic column on silica gel (*n*-hexane/dichloromethane = 1/1) to give the macrocycle **PrS[6]<sup>nPr</sup>** as white solid (150 mg, 55 %).

### Templated synthesis in presence of 5<sup>2+</sup>·2I<sup>-</sup> salt:

In a solution of 2,6-dialkoxynaphthalene **4b-c** in 1,2-dichloroethane (5 mM) was added paraformaldehyde (1.2 equiv) and templating agent 5<sup>2+</sup>·I<sup>-</sup> (1.0 equiv). The mixture was heated at 70 °C and then trifluoroacetic acid (15 equiv) was added. The solution was stirred at 70 °C for 22 h. After, 250 mL of an aqueous saturated solution of NaHCO<sub>3</sub> was added and the organic layer was washed with a 10 % aqueous solution of sodium thiosulfate (200 mL). Finally, the organic layer was dried on Na<sub>2</sub>SO<sub>4</sub> and evaporated in vacuum to give a light brown solid.

- Starting by 2,6-diethoxynaphthalene **4b** (1.00 g, 4.6 mmol): The crude product was purified through chromatographic column on silica gel (*n*-hexane/toluene/dichloromethane = 1/2/7) to give the macrocycles **PrS[5]<sup>Et</sup>** (110 mg, 10 %) and **PrS[6]<sup>Et</sup>** (370 mg, 35 %) as white solids.
- Starting by 2,6-dipropoxynaphthalene **4c** (1.00 g, 4.1 mmol): The crude product was purified through chromatographic column on silica gel (*n*-hexane/toluene/dichloromethane = 2.5/2.5/5) to give the macrocycles **PrS[5]<sup>nPr</sup>** (270 mg, 25 %) and **PrS[6]<sup>nPr</sup>** (260 mg, 25 %) as white solids.

### Derivative PrS[5]<sup>Et</sup>:

M.p.: > 372 °C dec. <sup>1</sup>H NMR (CD<sub>2</sub>Cl<sub>2</sub>, 400 MHz, 298 K): δ 7.85 (*d*, 10H, Ar-*H*, *J* = 9.2 Hz), 6.81 (*d*, 10H, Ar-*H*, *J* = 9.2 Hz), 4.70 (*s*, 10H, ArCH<sub>2</sub>Ar), 3.86 (*m*, 10H, OCH<sub>2</sub>), 3.66 (*m*, 10H, OCH<sub>2</sub>), 0.94 (*m*, 30H, CH<sub>3</sub>). <sup>13</sup>C NMR (CD<sub>2</sub>Cl<sub>2</sub>, 100 MHz, 298 K): δ 152.0, 129.8, 125.1, 124.1, 114.5, 65.5, 22.2, 15.2. HR MS (MALDI) *m/z* [M]<sup>+</sup> calcd for C<sub>75</sub>H<sub>80</sub>O<sub>10</sub>: 1140.5751; found: 1140.5796.

### Derivative PrS[5]<sup>nPr</sup>:

M. p. : > 333 °C dec. <sup>1</sup>H NMR (CD<sub>2</sub>Cl<sub>2</sub>, 400 MHz, 298 K): δ 8.06 (*d*, 10H, Ar-*H*, *J* = 9.6 Hz), 6.88 (*d*, 10H, Ar-*H*, *J* = 9.6 Hz), 4.71 (*s*, 10H, ArCH<sub>2</sub>Ar), 3.88 (*m*, 10H, OCH<sub>2</sub>), 3.76 (*m*, 10H, OCH<sub>2</sub>), 1.63 (*m*, 20H, OCH<sub>2</sub>CH<sub>2</sub>), 0.92 (*t*, 30H, CH<sub>3</sub>, *J* = 8.0 Hz). <sup>13</sup>C NMR (CD<sub>2</sub>Cl<sub>2</sub>, 100 MHz, 298 K): δ 152.0, 129.9, 125.2, 123.7, 114.4, 71.5, 23.4, 21.7, 11.0. HR MS (MALDI) *m/z* [M]<sup>+</sup> calcd for C<sub>85</sub>H<sub>100</sub>O<sub>10</sub>: 1280.7316; found: 1280.7388.

### Derivative PrS[6]<sup>Et</sup>:

M.p.: > 340 °C dec. <sup>1</sup>H NMR (CD<sub>2</sub>Cl<sub>2</sub>, 600 MHz, 243 K, Figure S23): δ 8.19 (*d*, 4H, Ar-*H*, *J* = 9.6 Hz), 7.73 (*d*, 4H, Ar-*H*, *J* = 9.6 Hz), 7.40 (*d*, 4H, Ar-*H*, *J* = 9.6 Hz), 7.37 (*d*, 4H, Ar-*H*, *J* = 9.6 Hz), 6.91 (*d*, 4H, Ar-*H*, *J* = 9.6 Hz), 6.27 (*d*, 4H, Ar-*H*, *J* = 9.6 Hz), 4.82 (*s*, 8H,

ArCH<sub>2</sub>Ar), 4.47 (s, 4H, ArCH<sub>2</sub>Ar), 4.39 (m, 4H, OCH<sub>2</sub>), 4.33 (m, 4H, OCH<sub>2</sub>), 4.20 (m, 4H, OCH<sub>2</sub>), 4.06 (m, 4H, OCH<sub>2</sub>), 3.04 (m, 4H, OCH<sub>2</sub>), 1.54 (overlapped, 16H, OCH<sub>2</sub> and CH<sub>3</sub>), 1.42 (t, 12H, CH<sub>3</sub>, J = 6.6 Hz), -0.94 (t, 12H, CH<sub>3</sub>, J = 6.6 Hz). <sup>13</sup>C NMR (TCDE, 150 MHz, 298 K): δ 152.0, 151.6, 150.9, 129.6, 126.4, 124.9, 123.9, 123.5, 116.2, 114.8, 114.0, 66.0, 65.4, 65.1, 23.5, 21.2, 15.5, 13.5. HR MS (MALDI) m/z [M]<sup>+</sup> calcd for C<sub>90</sub>H<sub>96</sub>O<sub>12</sub>: 1368.6902; found: 1368.6941.

#### Derivative PrS[6]<sup>nPr</sup>:

M.p.: > 306°C dec. <sup>1</sup>H NMR (CD<sub>2</sub>Cl<sub>2</sub>, 600 MHz, 243 K, Figure S26): δ 8.28 (d, 4H, Ar-H, J = 9.6 Hz), 7.91 (d, 4H, Ar-H, J = 9.6 Hz), 7.52 (d, 4H, Ar-H, J = 9.6 Hz), 7.35 (d, 4H, Ar-H, J = 9.6 Hz), 7.01 (d, 4H, Ar-H, J = 9.6 Hz), 6.35 (d, 4H, Ar-H, J = 9.6 Hz), 4.82 (s, 8H, ArCH<sub>2</sub>Ar), 4.42 (s, 4H, ArCH<sub>2</sub>Ar), 4.25 (overlapped, 8H, OCH<sub>2</sub>), 4.17 (m, 4H, OCH<sub>2</sub>), 3.95 (m, 4H, OCH<sub>2</sub>), 3.00 (m, 4H, OCH<sub>2</sub>), 2.29 (m, 4H, OCH<sub>2</sub>), 1.95 (m, 8H, OCH<sub>2</sub>CH<sub>2</sub>), 1.85 (m, 8H, OCH<sub>2</sub>CH<sub>2</sub>), 1.14 (t, 12H, CH<sub>3</sub>, J = 7.2 Hz), 1.05 (m, 12H, CH<sub>3</sub>, J = 7.2 Hz), -0.08 (m, 4H, OCH<sub>2</sub>CH<sub>2</sub>), -0.24 (m, 4H, OCH<sub>2</sub>CH<sub>2</sub>), -0.71 (m, 12H, CH<sub>3</sub>, J = 7.2 Hz). <sup>13</sup>C NMR (CD<sub>2</sub>Cl<sub>2</sub>, 150 MHz, 298 K): δ 153.3, 151.7, 130.2, 125.1, 124.9, 124.3, 115.8, 114.8, 114.3, 71.9, 71.7, 71.4, 23.7, 22.1, 21.6, 11.2, 10.4. HR MS (MALDI) m/z [M]<sup>+</sup> calcd for C<sub>102</sub>H<sub>120</sub>O<sub>12</sub>: 1536.8780; found: 1536.8790.

#### Derivative PrS[6]<sup>nBu</sup>:

M.p.: > 310°C dec. <sup>1</sup>H NMR (TCDE, 400 MHz, 298 K): δ 8.13-7.81 (overlapped, 8H, Ar-H), 7.51 (br, 4H, Ar-H), 7.18 (br, 4H, Ar-H), 6.84 (br, 4H, Ar-H), 6.21 (br, 4H, Ar-H), 4.67 (overlapped, 8H, ArCH<sub>2</sub>Ar), 4.27-3.83 (overlapped, 20H, ArCH<sub>2</sub>Ar and OCH<sub>2</sub>), 2.77 (br, 4H, OCH<sub>2</sub>), 2.39 (br, 4H, OCH<sub>2</sub>), 1.70-1.30 (overlapped, 40H, OCH<sub>2</sub>CH<sub>2</sub>CH<sub>2</sub> and OCH<sub>2</sub>CH<sub>2</sub>CH<sub>2</sub>), 0.80-0.71 (overlapped, 24H, CH<sub>3</sub>), -0.26 (br, 8H, OCH<sub>2</sub>CH<sub>2</sub>CH<sub>2</sub>), -0.73 (br, 12H, CH<sub>3</sub>). <sup>1</sup>H NMR (TCDE, 400 MHz, 393 K): δ 7.83 (d, 12H, Ar-H, J = 12.0 Hz), 6.75 (d, 12H, Ar-H, J = 12.0 Hz), 4.63 (s, 12H, ArCH<sub>2</sub>Ar), 3.58 (br, 24H, OCH<sub>2</sub>), 1.10-1.20 (overlapped, 48H, OCH<sub>2</sub>CH<sub>2</sub>CH<sub>2</sub>CH<sub>3</sub>), 0.60 (br t, 36H, CH<sub>3</sub>). <sup>13</sup>C NMR (TCDE, 100 MHz, 298 K): δ 152.1, 151.6, 151.2, 129.6, 124.7, 124.4, 124.1, 115.0, 114.5, 114.0, 69.0, 31.9, 19.4, 18.4, 18.0, 13.9, 12.7. HR MS (MALDI) m/z [M]<sup>+</sup> calcd for C<sub>114</sub>H<sub>144</sub>O<sub>12</sub>: 1705.0658; found: 1705.0698.

#### Derivative PrS[6]<sup>nPent</sup>:

M.p.: > 300°C dec. <sup>1</sup>H NMR (TCDE, 300 MHz, 393 K, Figure S17): δ 7.79 (d, 12H, Ar-H, J = 9.0 Hz), 6.72 (d, 12H, Ar-H, J = 9.0 Hz), 4.62 (s, 12H, ArCH<sub>2</sub>Ar), 3.50 (m, 24H, OCH<sub>2</sub>), 1.20 (overlapped, 72H, OCH<sub>2</sub>CH<sub>2</sub>CH<sub>2</sub>CH<sub>2</sub>), 0.72 (m, 36H, CH<sub>3</sub>, J = 6.0 Hz). <sup>13</sup>C NMR (TCDE, 62.5 MHz, 298 K): δ 151.6, 151.0, 129.6, 124.5, 124.2, 114.3, 69.2, 29.6, 29.1, 28.2, 22.3, 13.9. HR MS (MALDI) m/z [M]<sup>+</sup> calcd for C<sub>126</sub>H<sub>168</sub>O<sub>12</sub>: 1873.2536; found: 1873.2572.

# Copies of 1D and 2D NMR and HR Mass Spectra of PrS[n]<sup>R</sup>

## Copies of 1D and 2D NMR and HR mass spectrum of PrS[5]<sup>Et</sup>

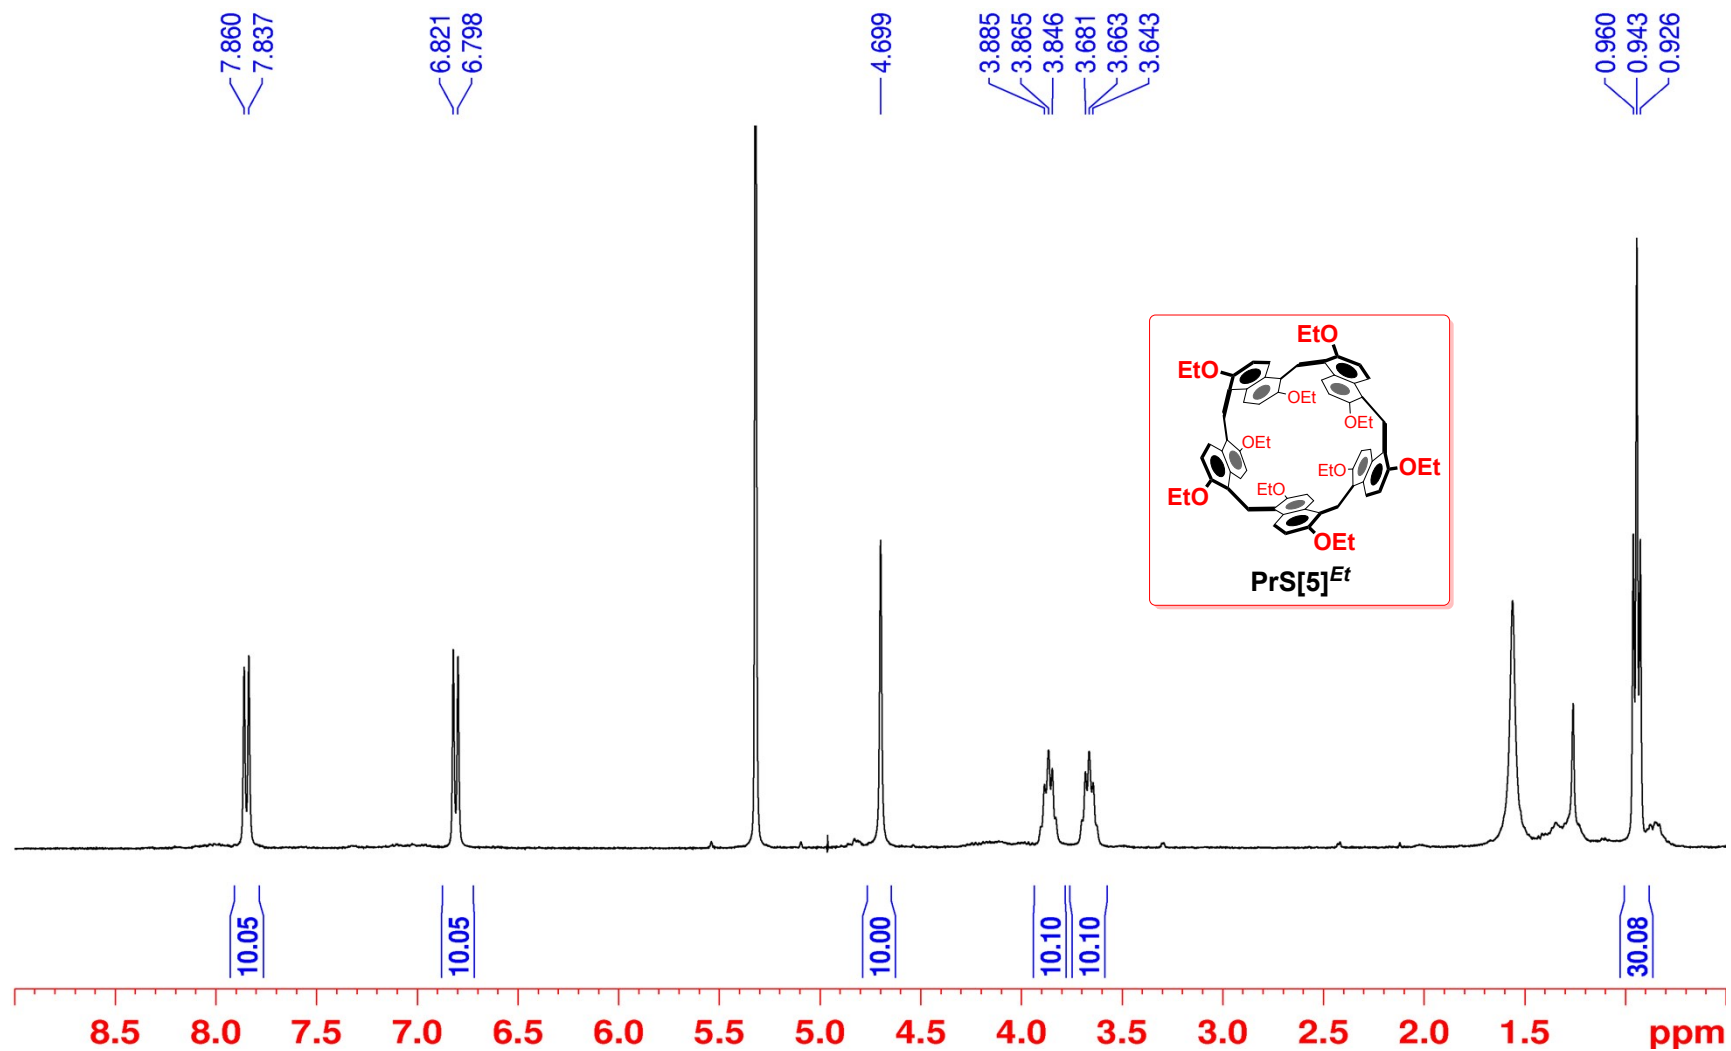

Figure S1: <sup>1</sup>H NMR spectrum of PrS[5]<sup>Et</sup> (CD<sub>2</sub>Cl<sub>2</sub>, 400 MHz, 298 K).

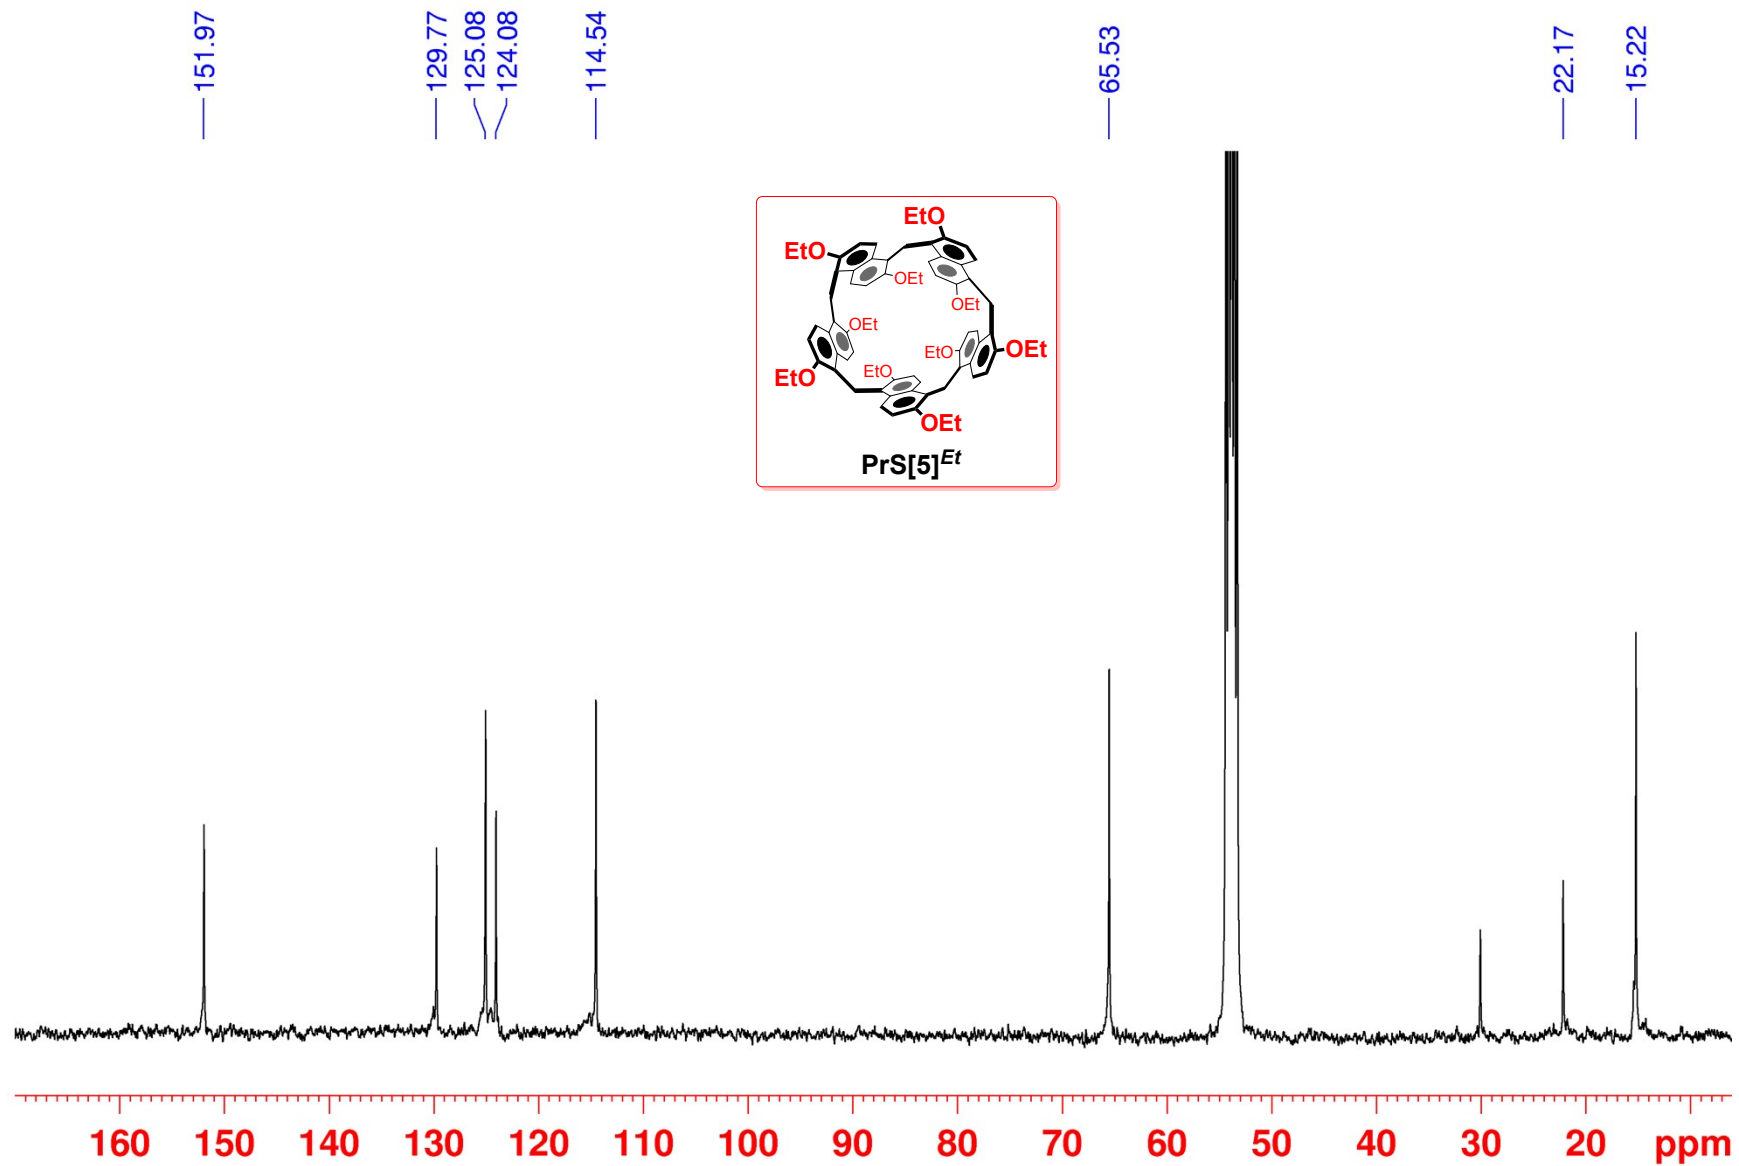

Figure S2:  $^{13}\text{C}$  NMR spectrum of  $\text{PrS}[5]^{\text{Et}}$  ( $\text{CD}_2\text{Cl}_2$ , 100 MHz, 298 K).

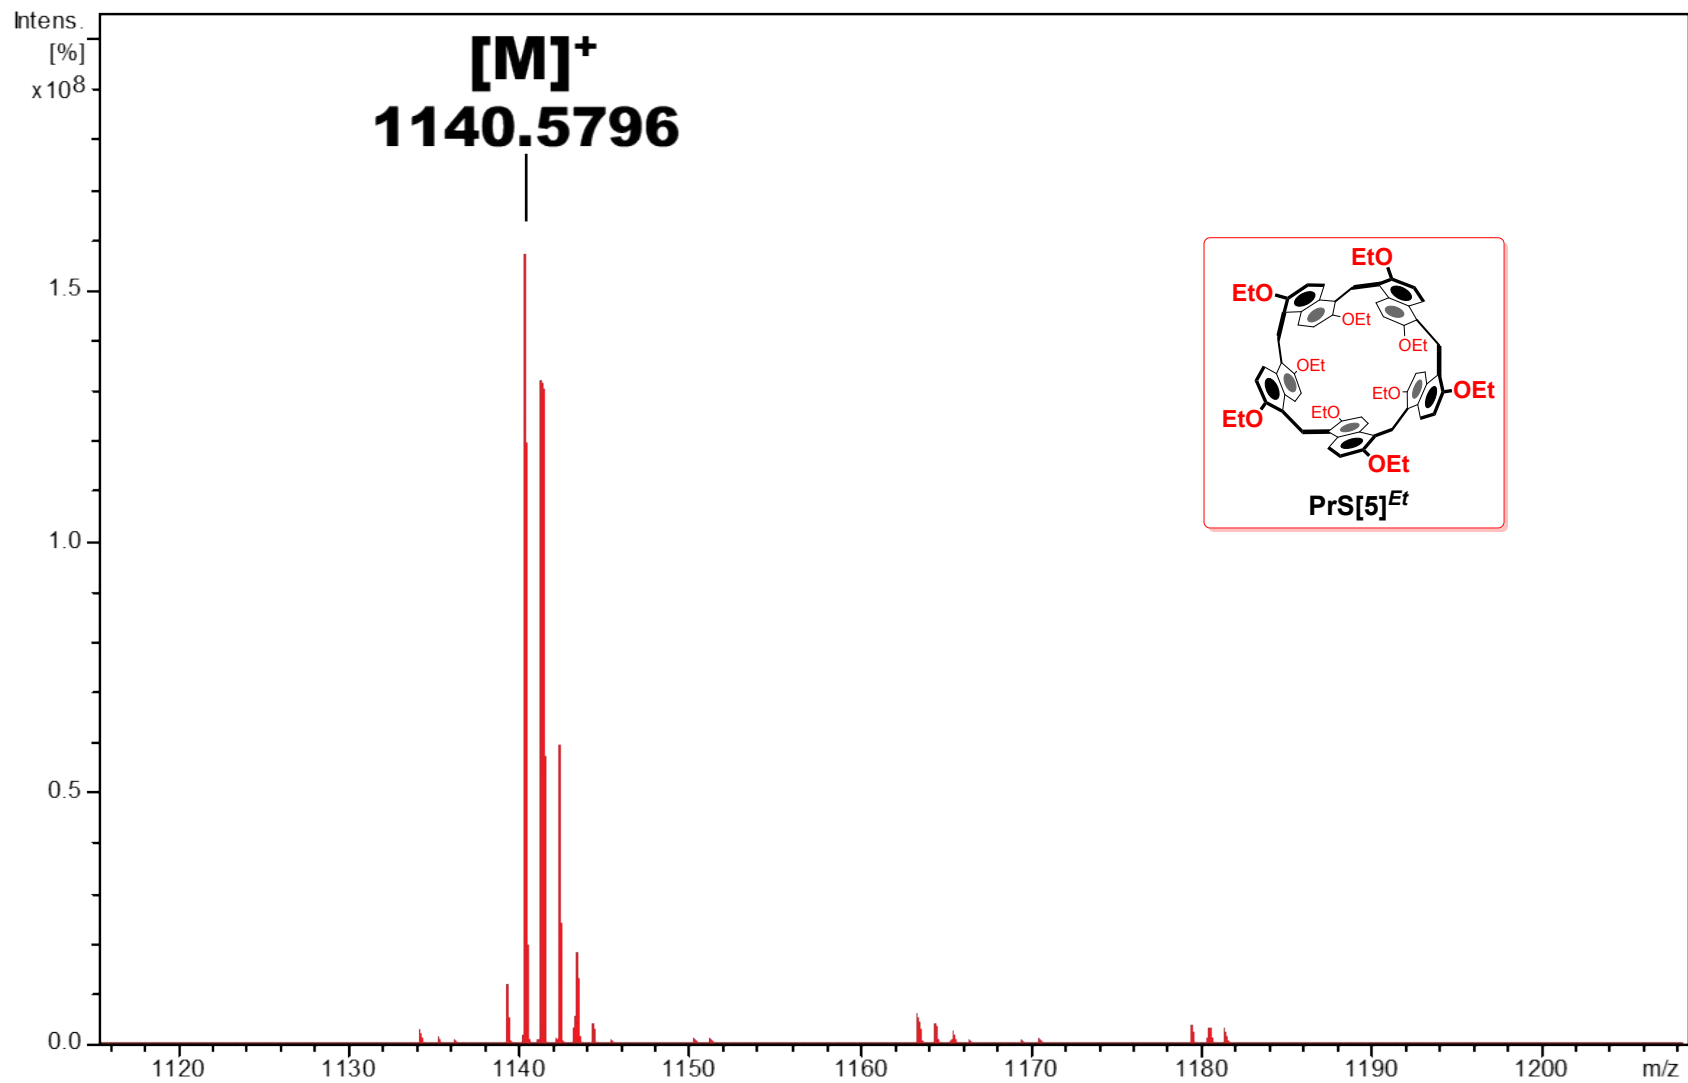

**Figure S3:** Significant portion of the HR MALDI FT-ICR mass spectrum of  $\text{PrS}[5]^{\text{Et}} [M]^+$ .



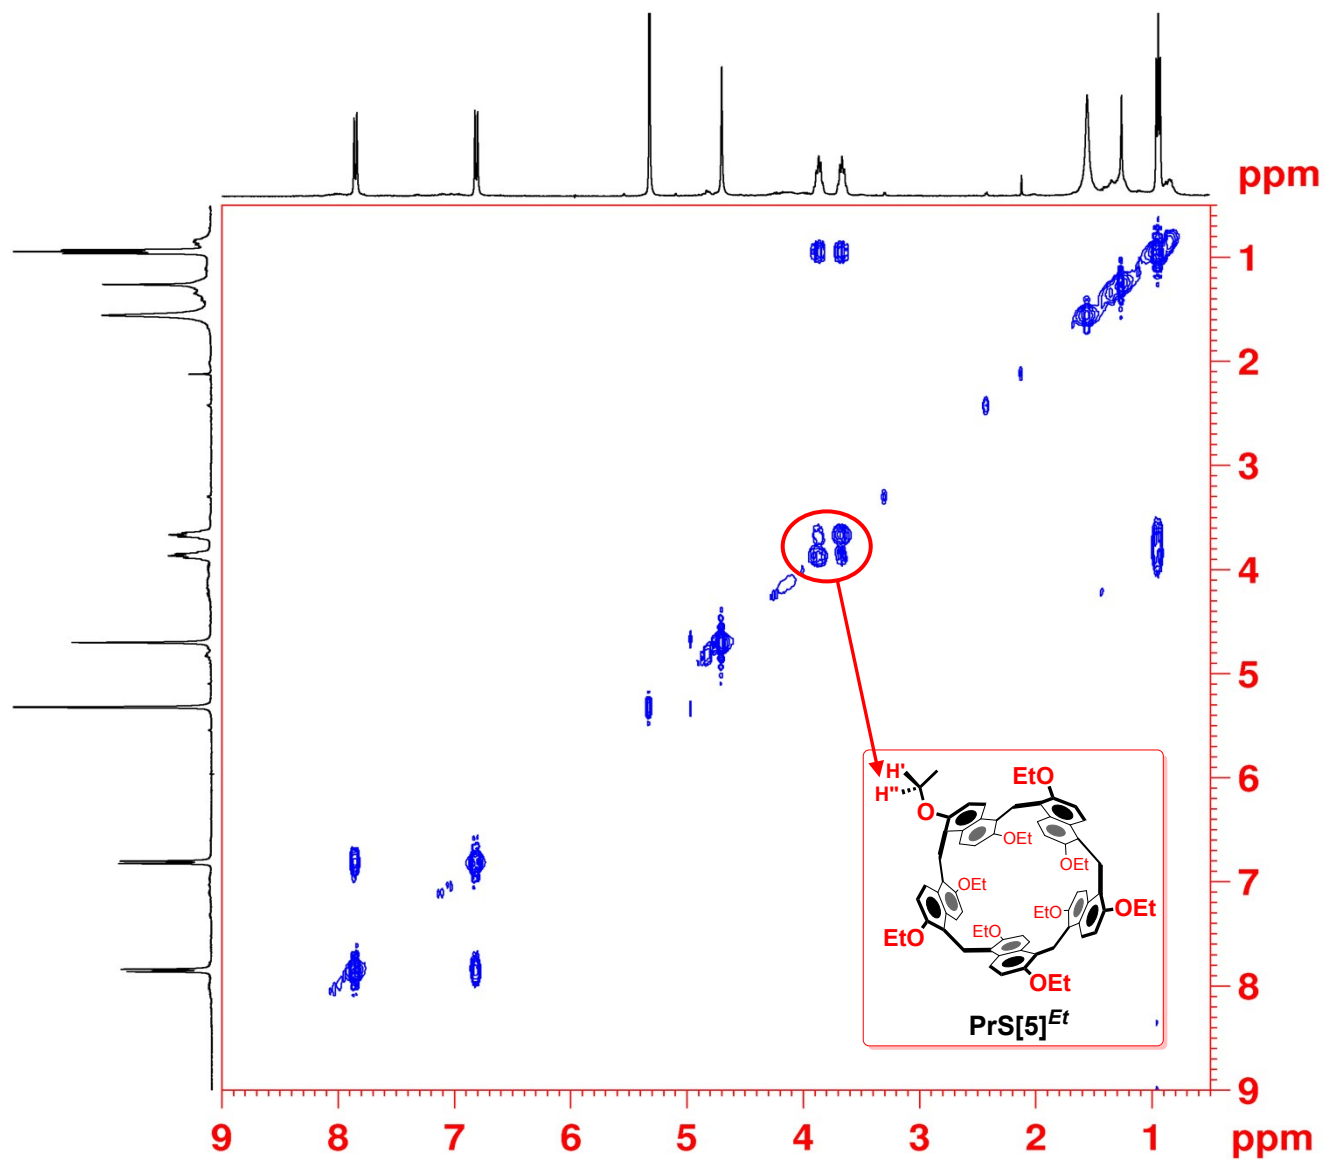

Figure S4: 2D-DQF COSY spectrum of  $\text{PrS}[5]^{\text{Et}}$  ( $\text{CD}_2\text{Cl}_2$ , 400 MHz, 298 K).

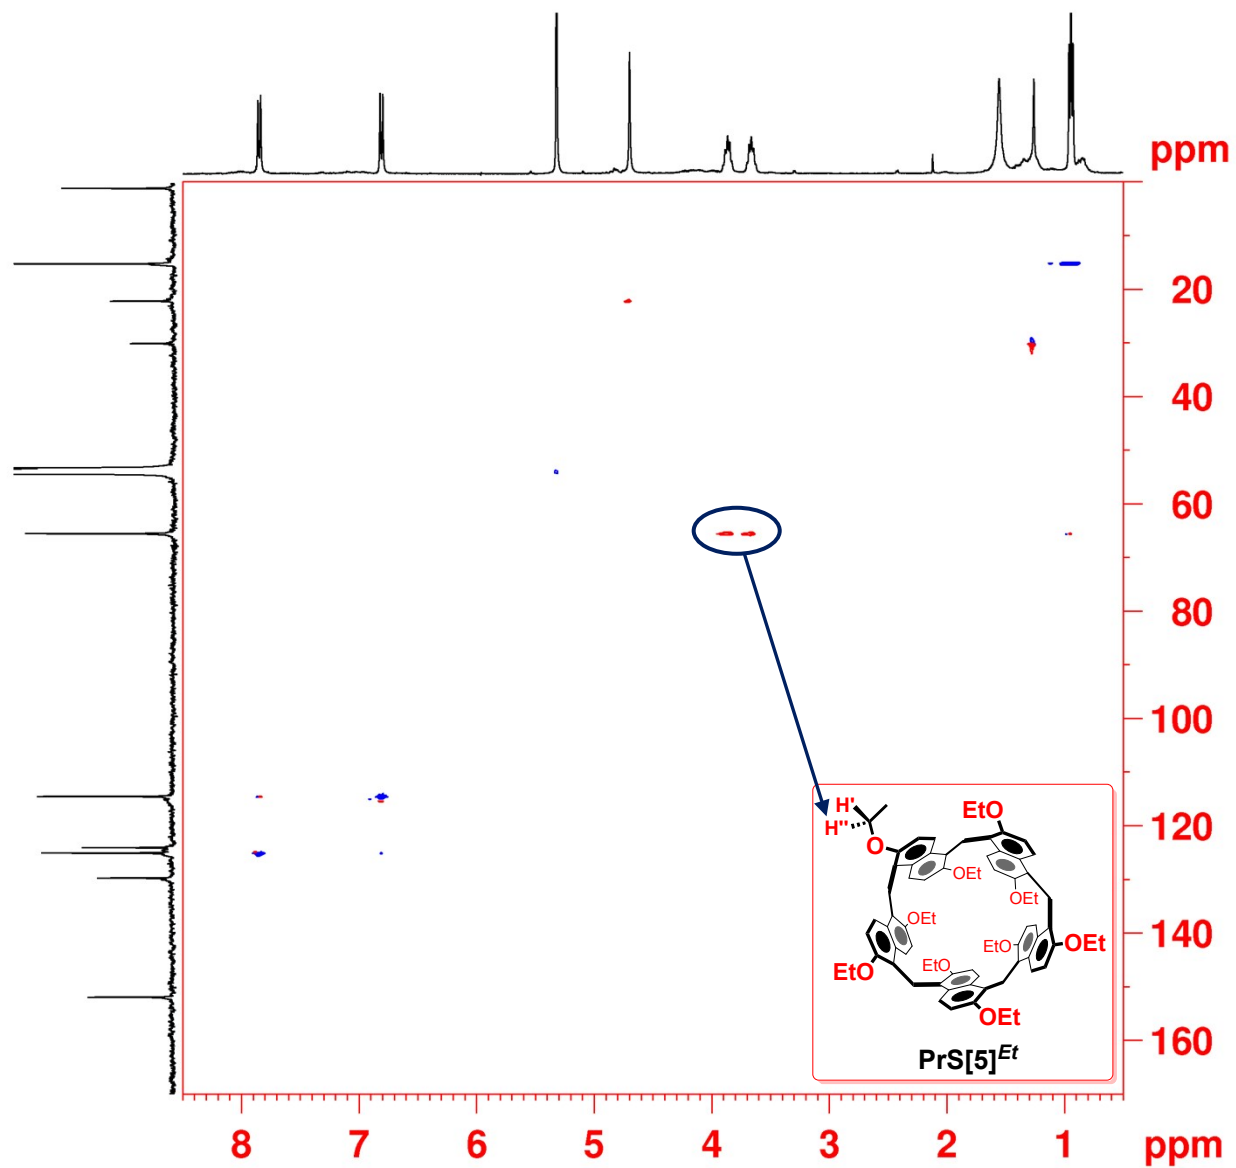

Figure S5: 2D-HSQC spectrum of PrS[5]<sup>Et</sup> (CD<sub>2</sub>Cl<sub>2</sub>, 400 MHz, 298 K).

Copies of 1D and 2D NMR and HR mass spectrum of PrS[5]<sup>nPr</sup>

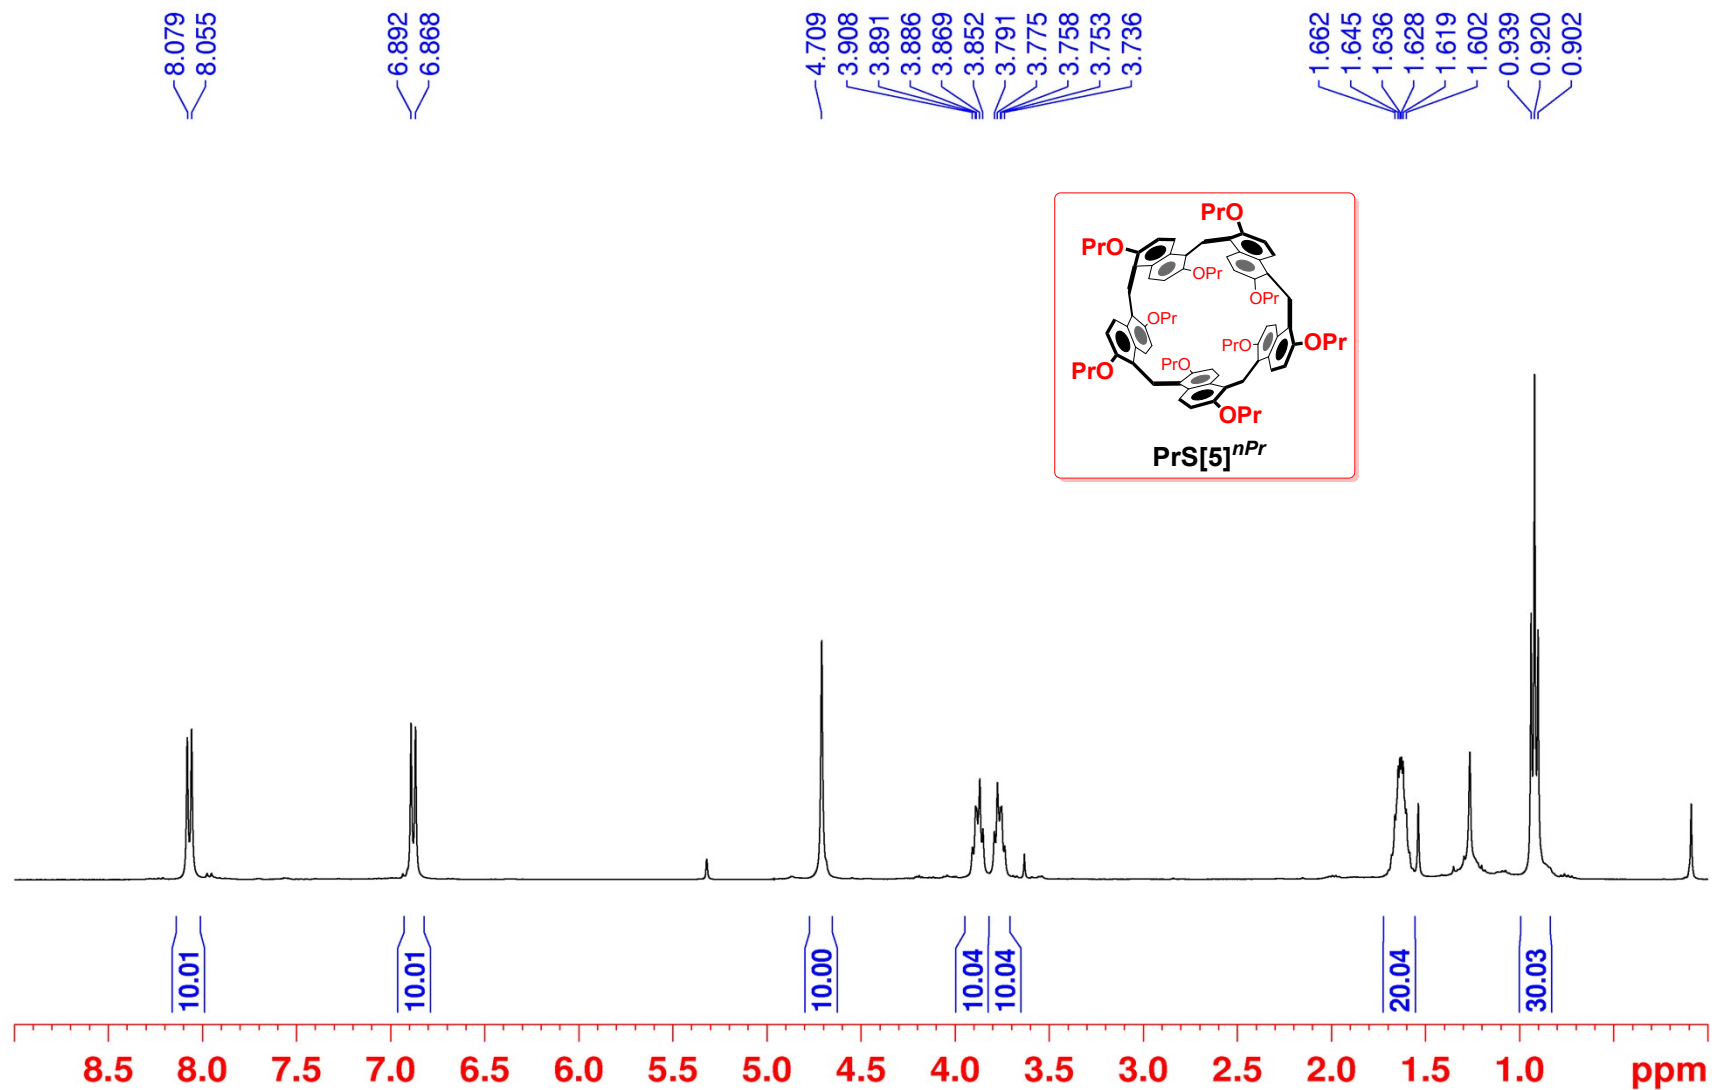

Figure S6: <sup>1</sup>H NMR spectrum of PrS[5]<sup>nPr</sup> (CD<sub>2</sub>Cl<sub>2</sub>, 400 MHz, 298 K).

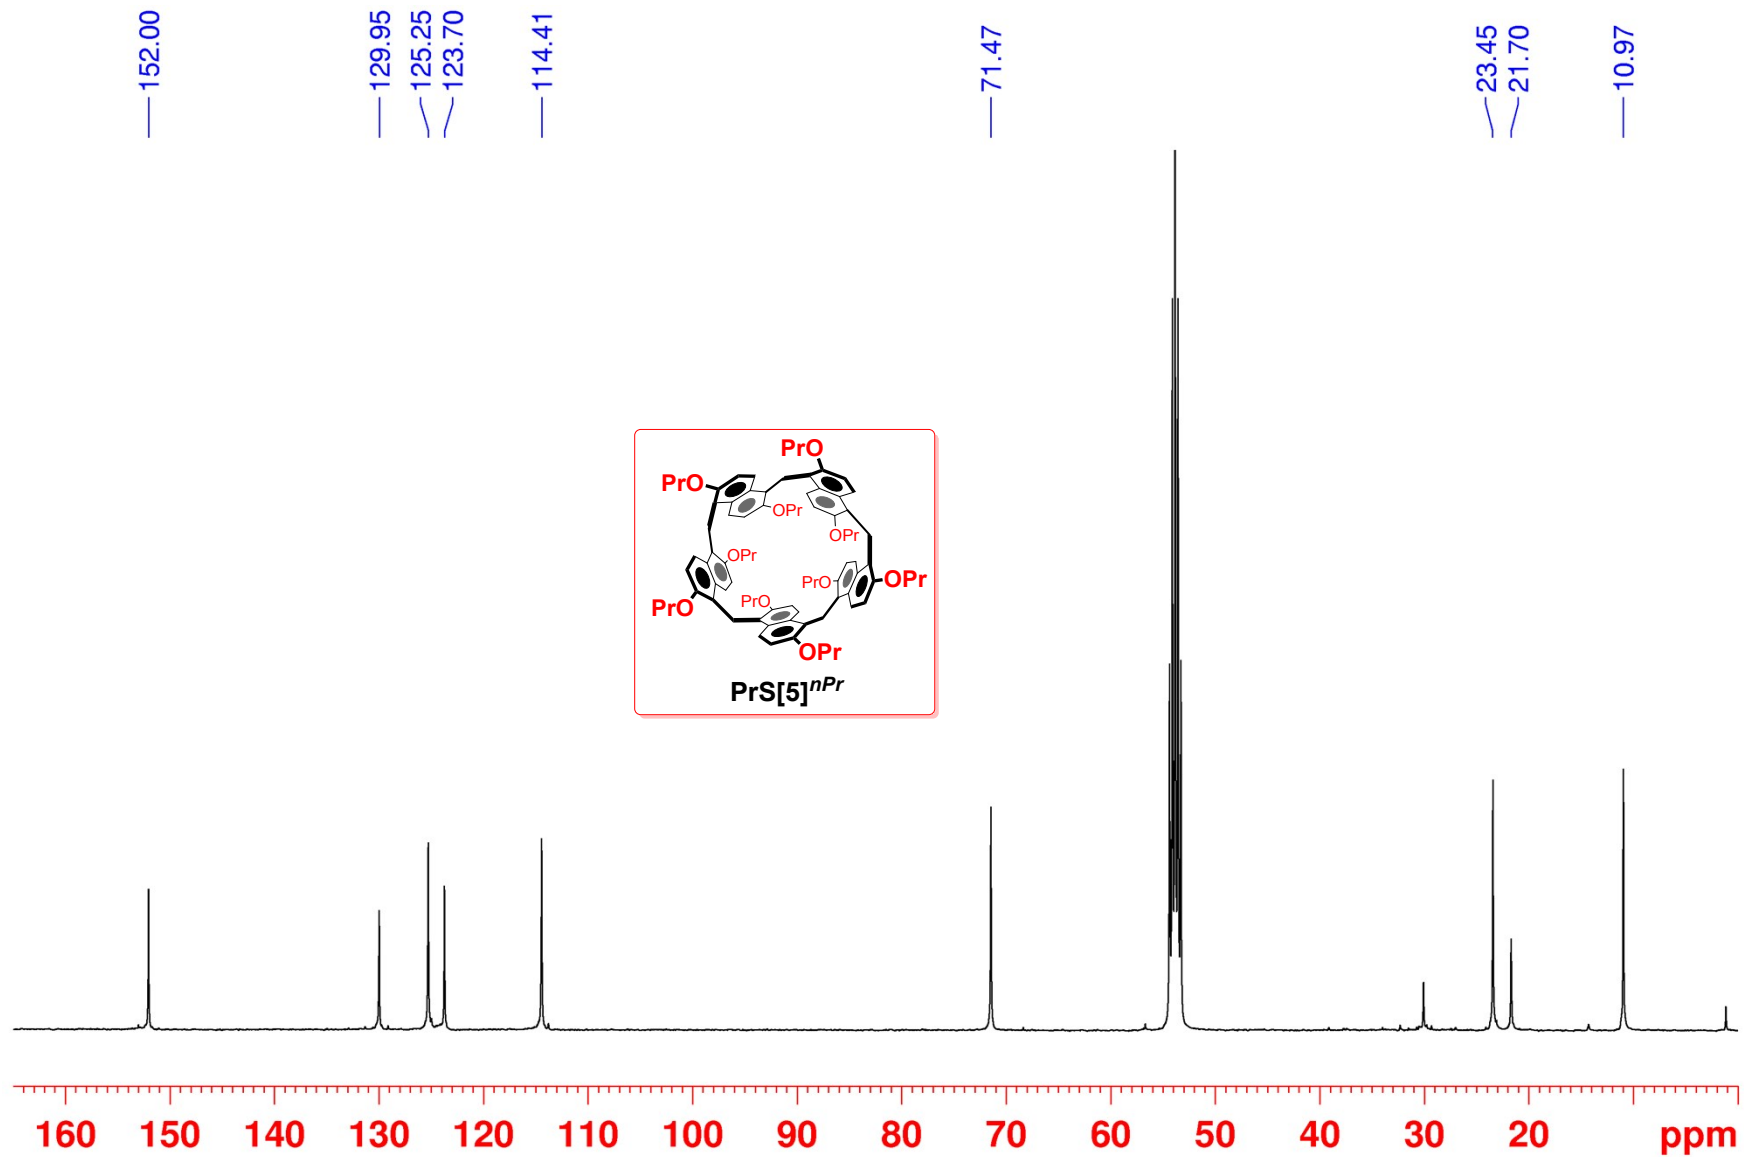

Figure S7:  $^{13}\text{C}$  NMR spectra of  $\text{PrS}[5]^{n\text{Pr}}$  ( $\text{CD}_2\text{Cl}_2$ , 100 MHz, 298 K).

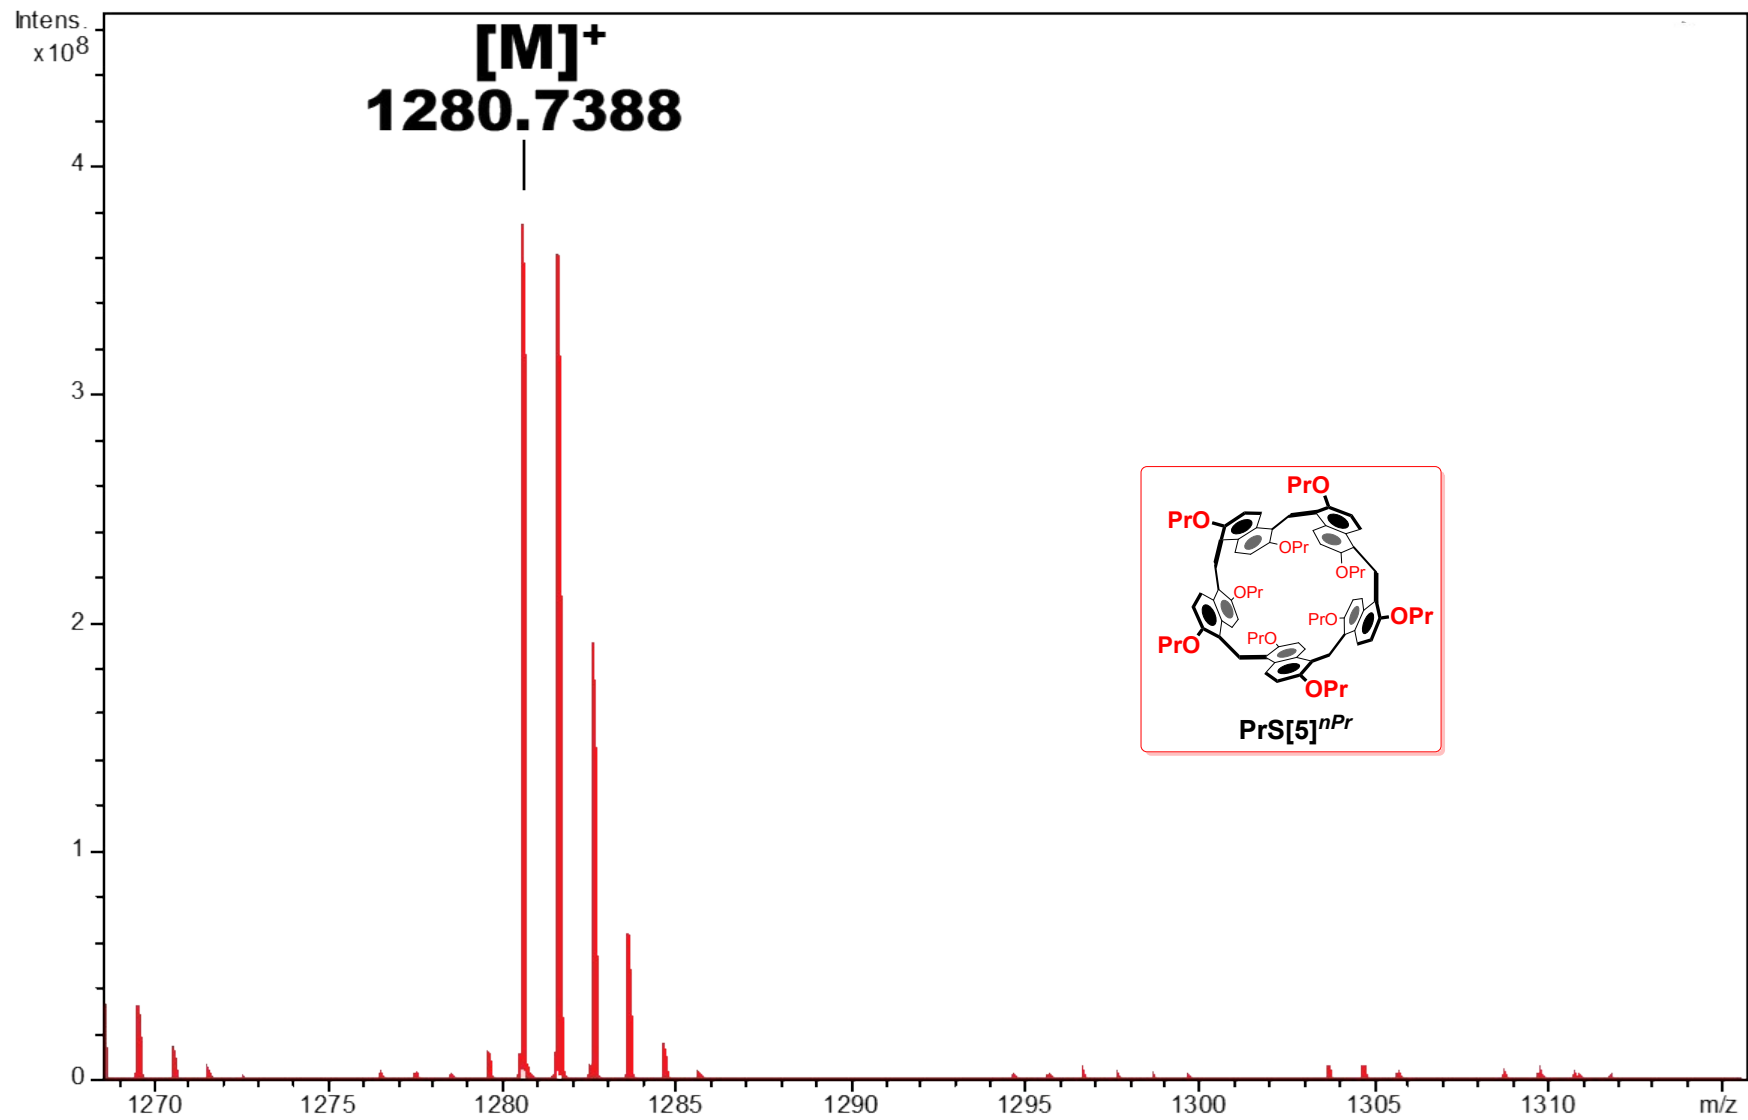

**Figure S8:** Significant portion of the HR MALDI FT-ICR mass spectrum of **PrS[5]<sup>nPr</sup> [M]<sup>+</sup>**.

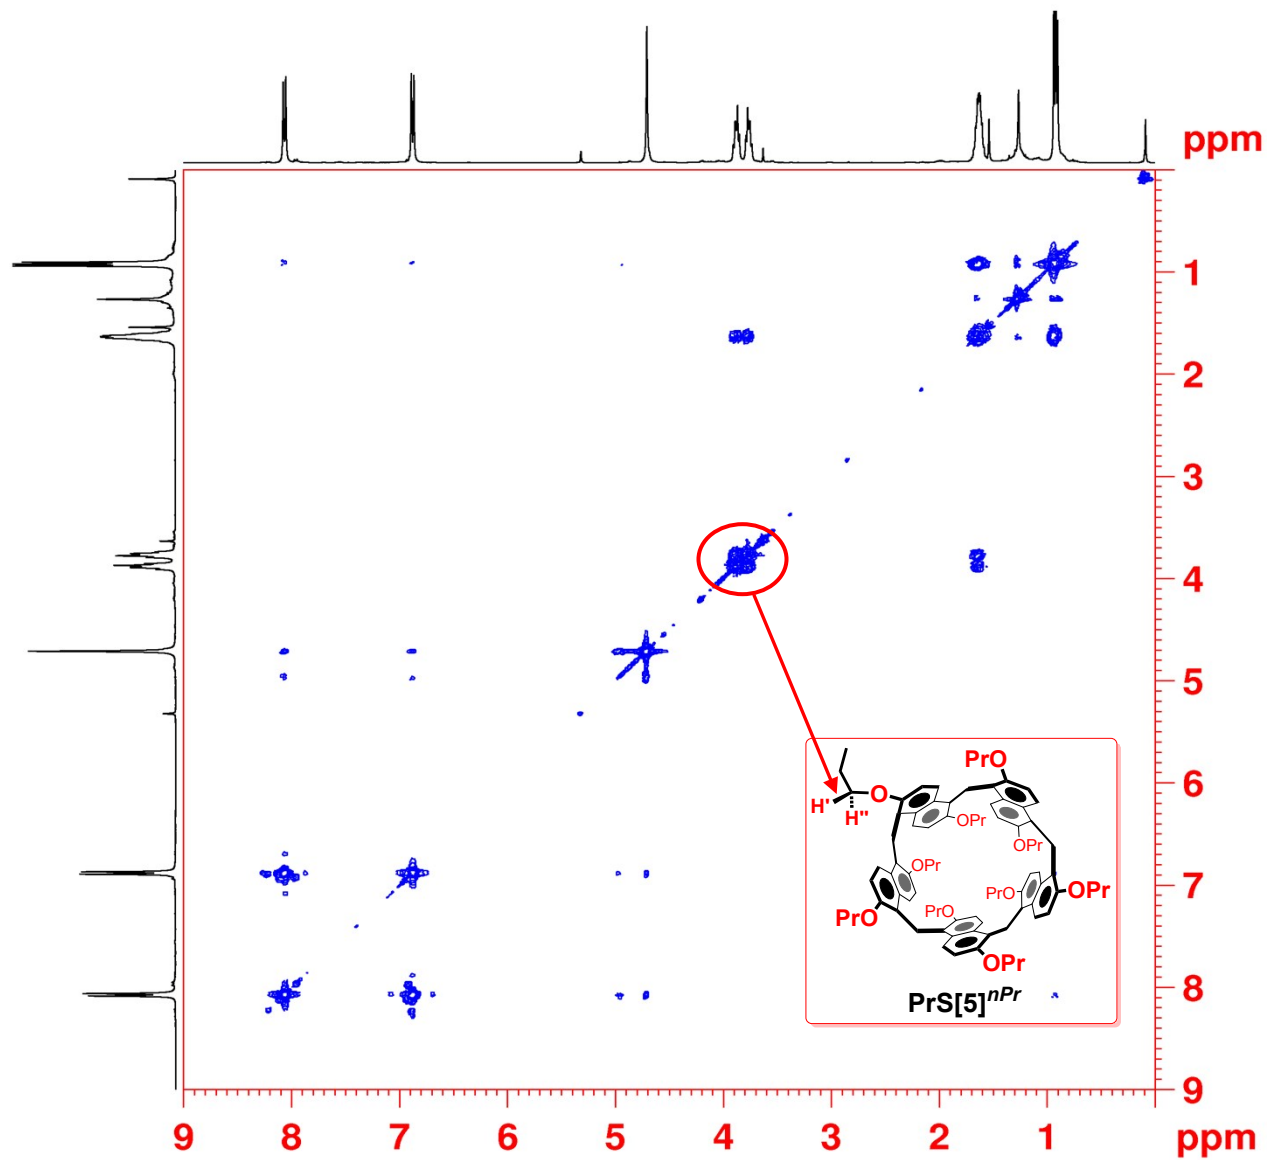

Figure S9: 2D-DQF COSY spectrum of  $\text{PrS}[5]^{n\text{Pr}}$  ( $\text{CD}_2\text{Cl}_2$ , 400 MHz, 298 K).

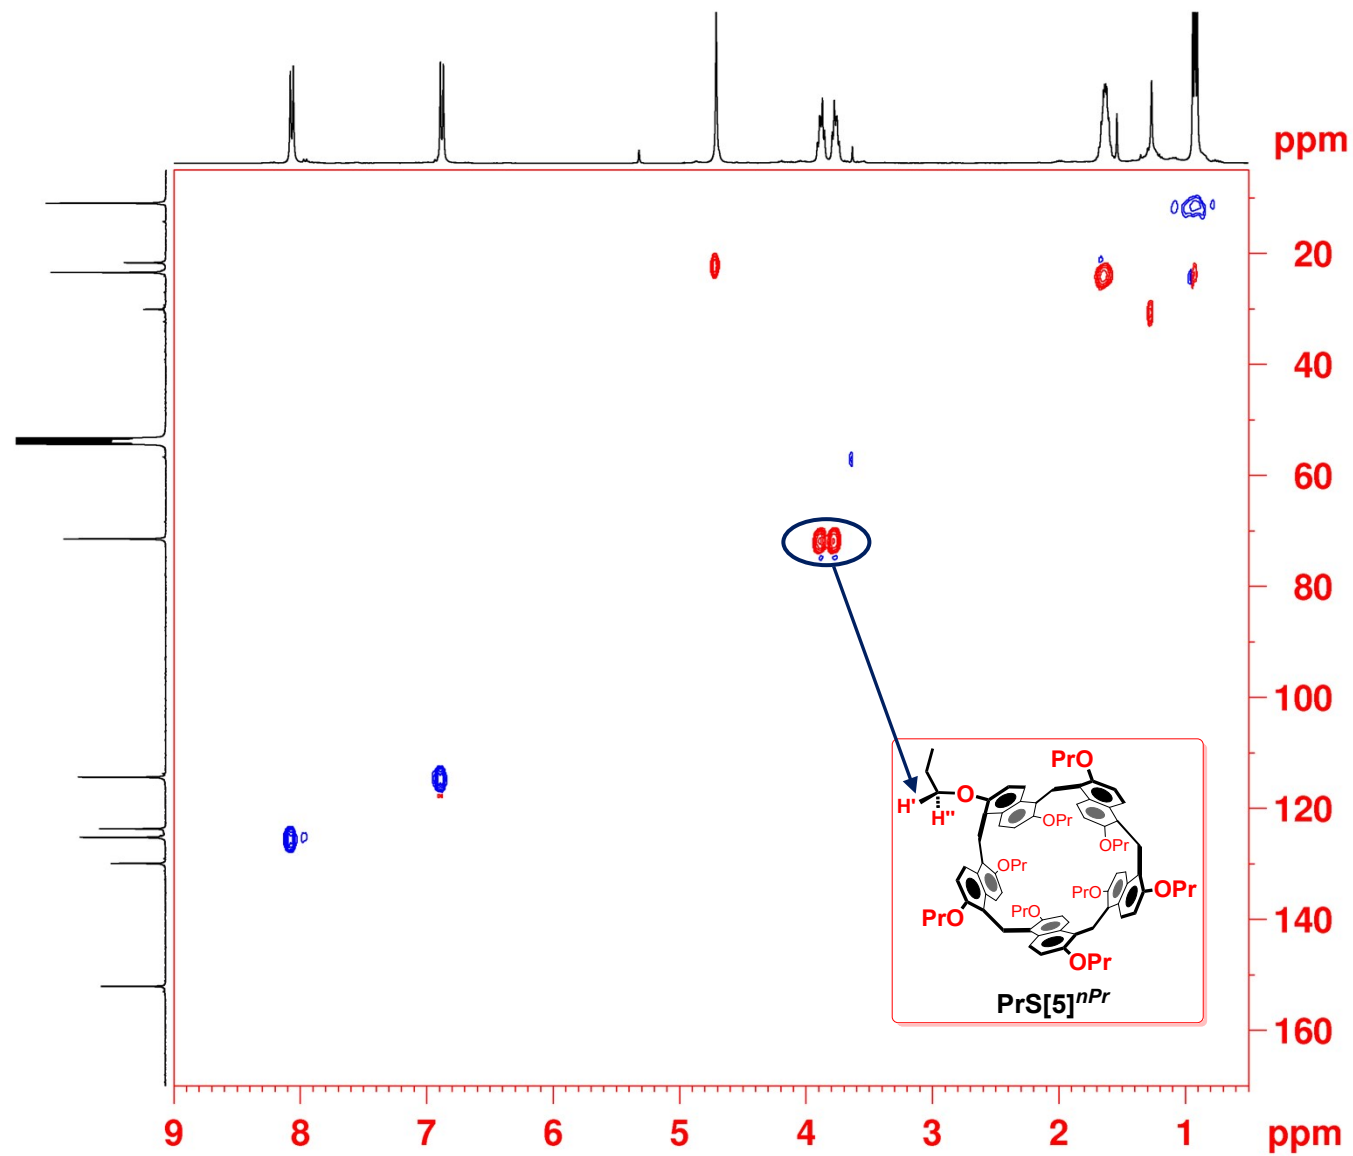

Figure S10: 2D-HSQC spectrum of  $\text{PrS}[5]^{n\text{Pr}}$  ( $\text{CD}_2\text{Cl}_2$ , 400 MHz, 298 K).

Copies of NMR and HR mass spectrum of PrS[6]<sup>Et</sup>

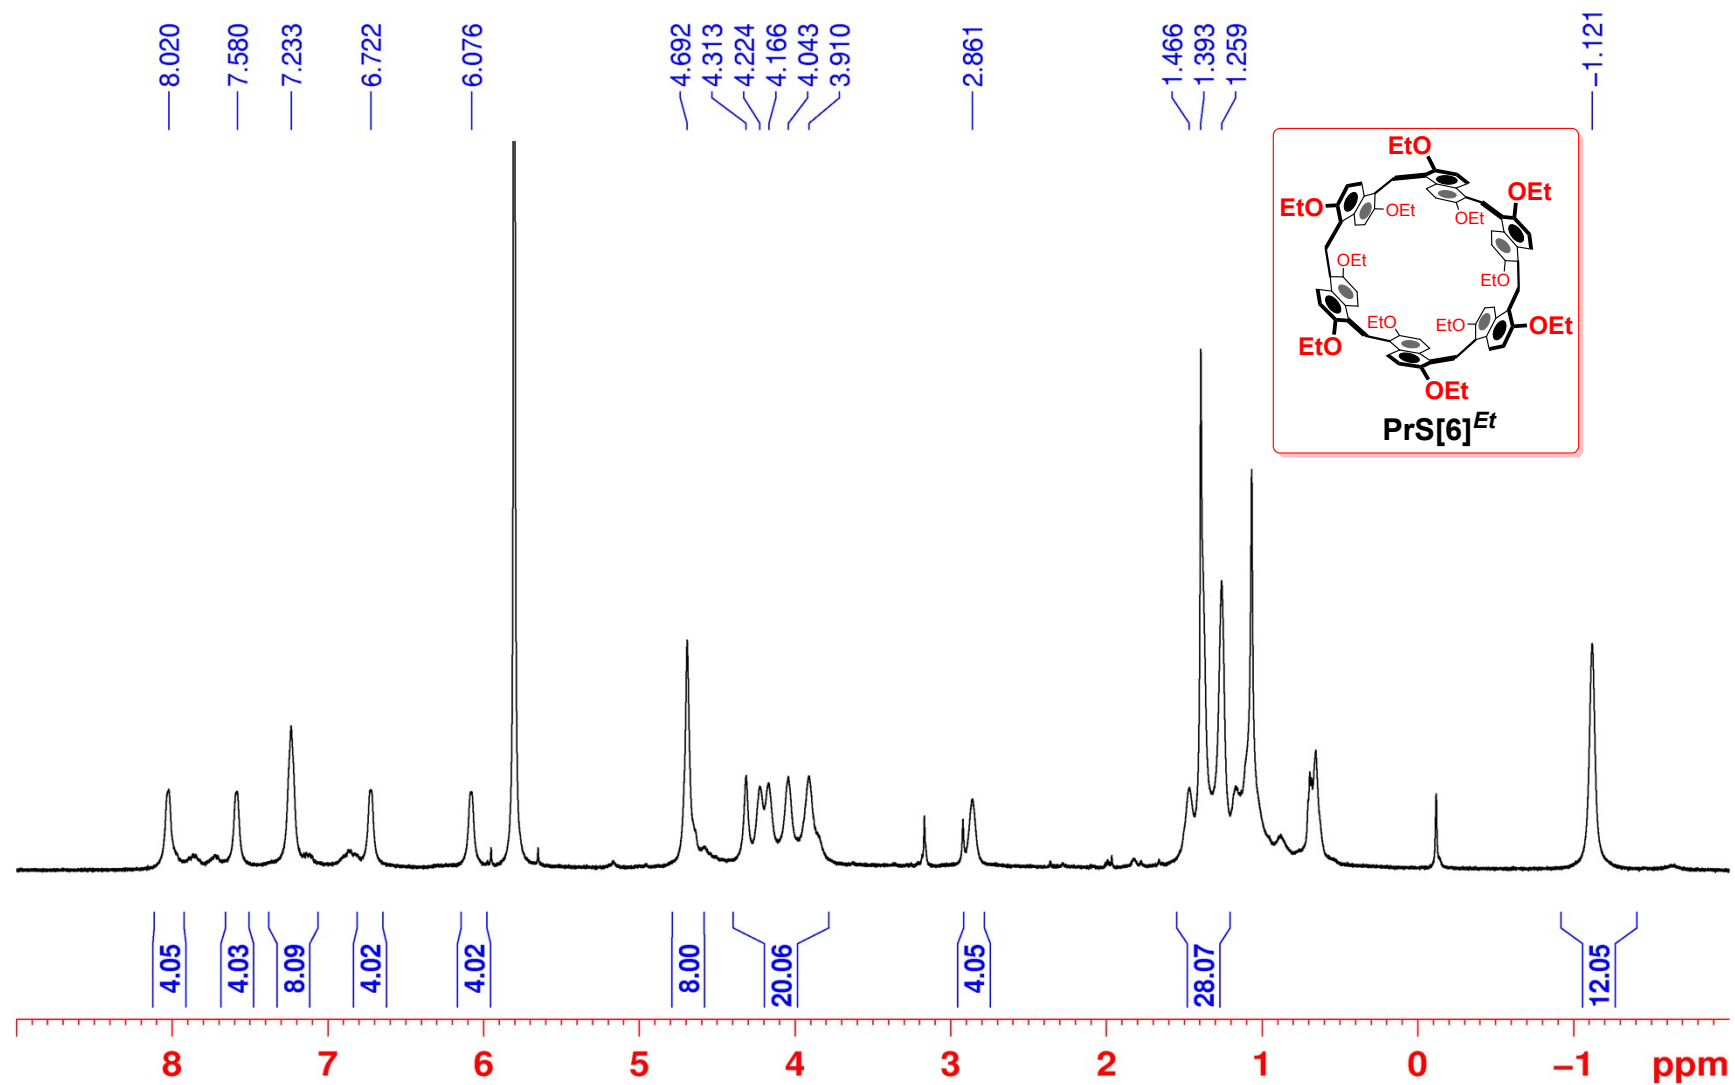

Figure S11: <sup>1</sup>H NMR spectrum of PrS[6]<sup>Et</sup> (TCDE, 600 MHz, 298 K).



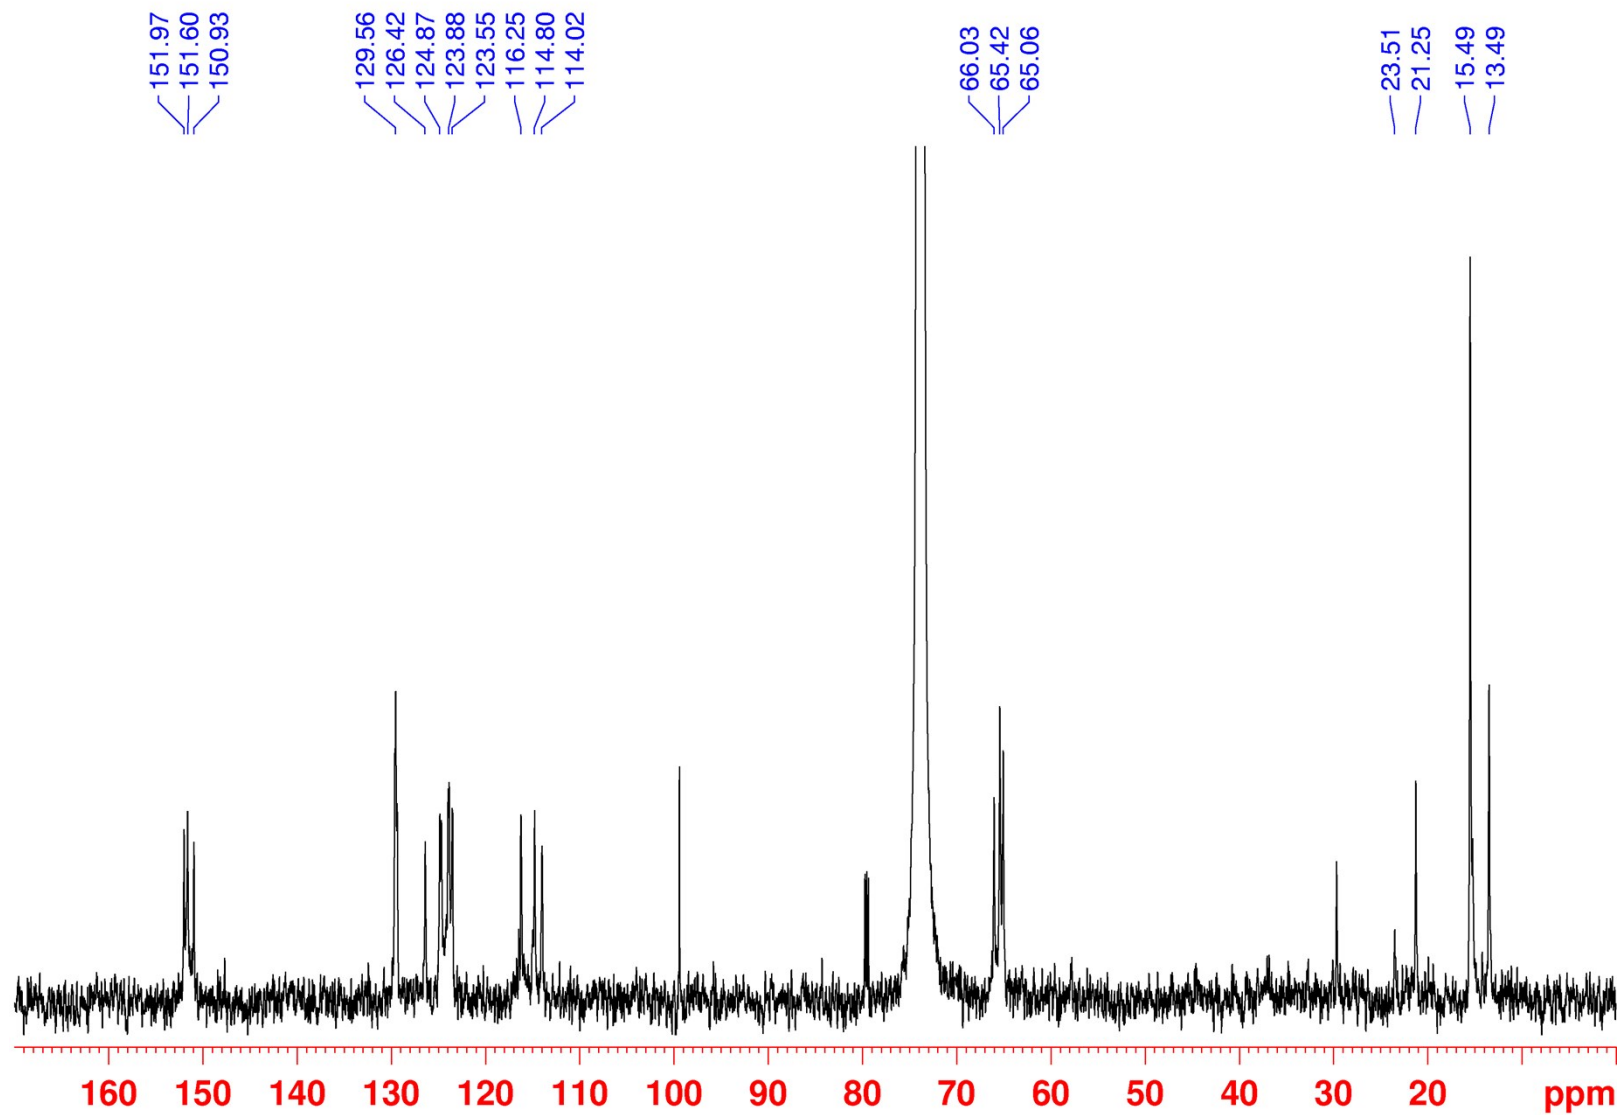

Figure S12:  $^{13}\text{C}$  NMR spectra of  $\text{PrS}[6]^{\text{Et}}$  (TCDE, 150 MHz, 298 K).

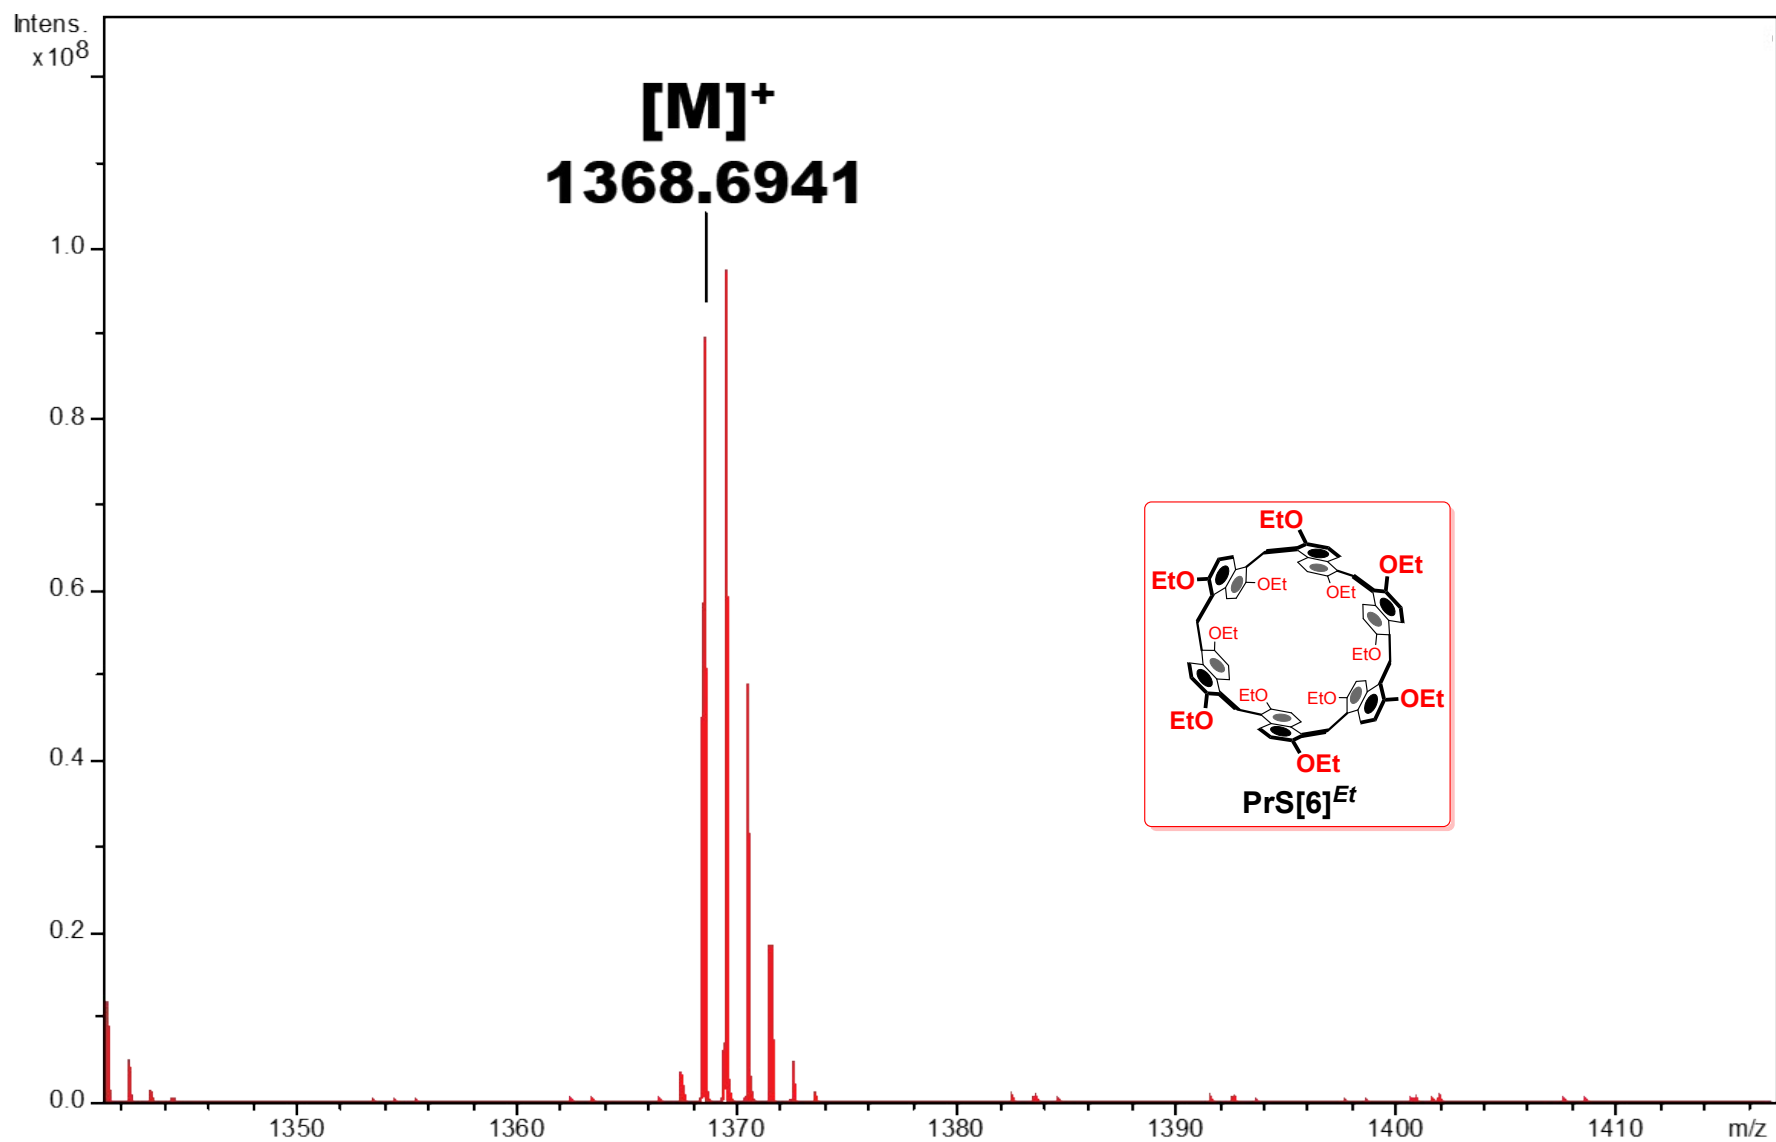

**Figure S13:** Significant portion of the HR MALDI FT-ICR mass spectrum of **PrS[6]<sup>Et</sup> [M]<sup>+</sup>**.

Copies of NMR and HR mass spectrum of PrS[6]<sup>nPr</sup>

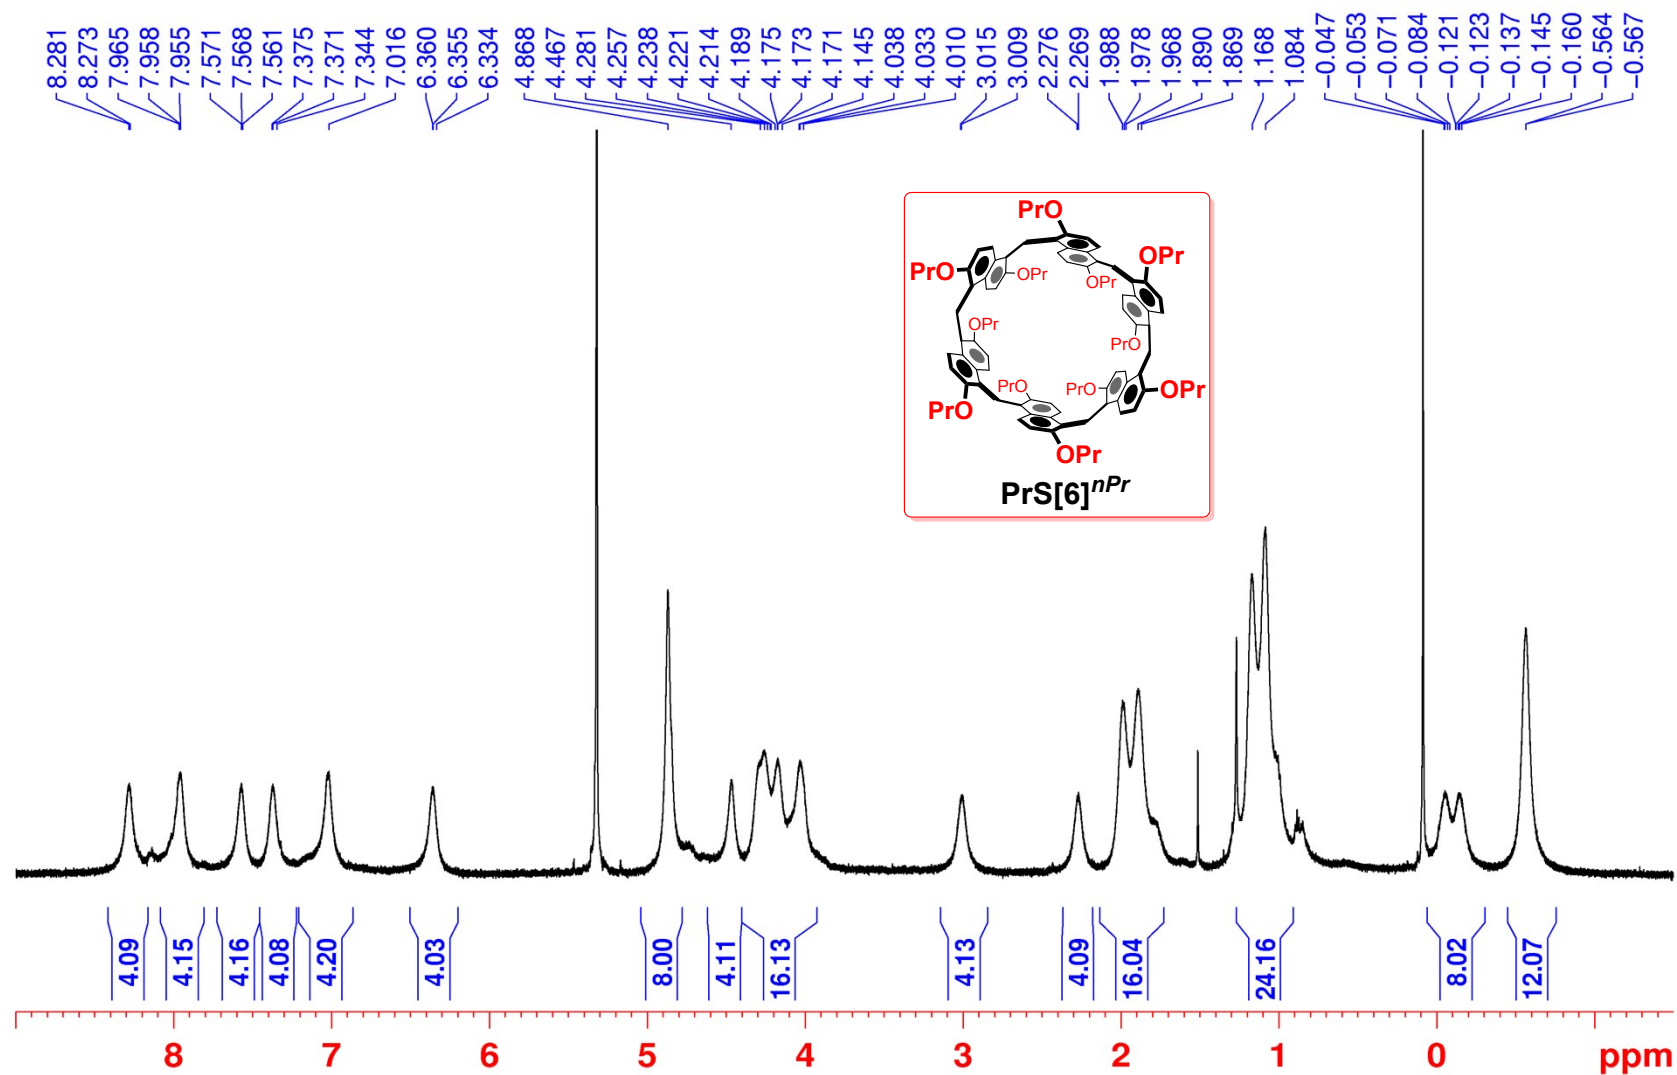

Figure S14: <sup>1</sup>H NMR spectrum of PrS[6]<sup>nPr</sup> (CD<sub>2</sub>Cl<sub>2</sub>, 600 MHz, 298 K).

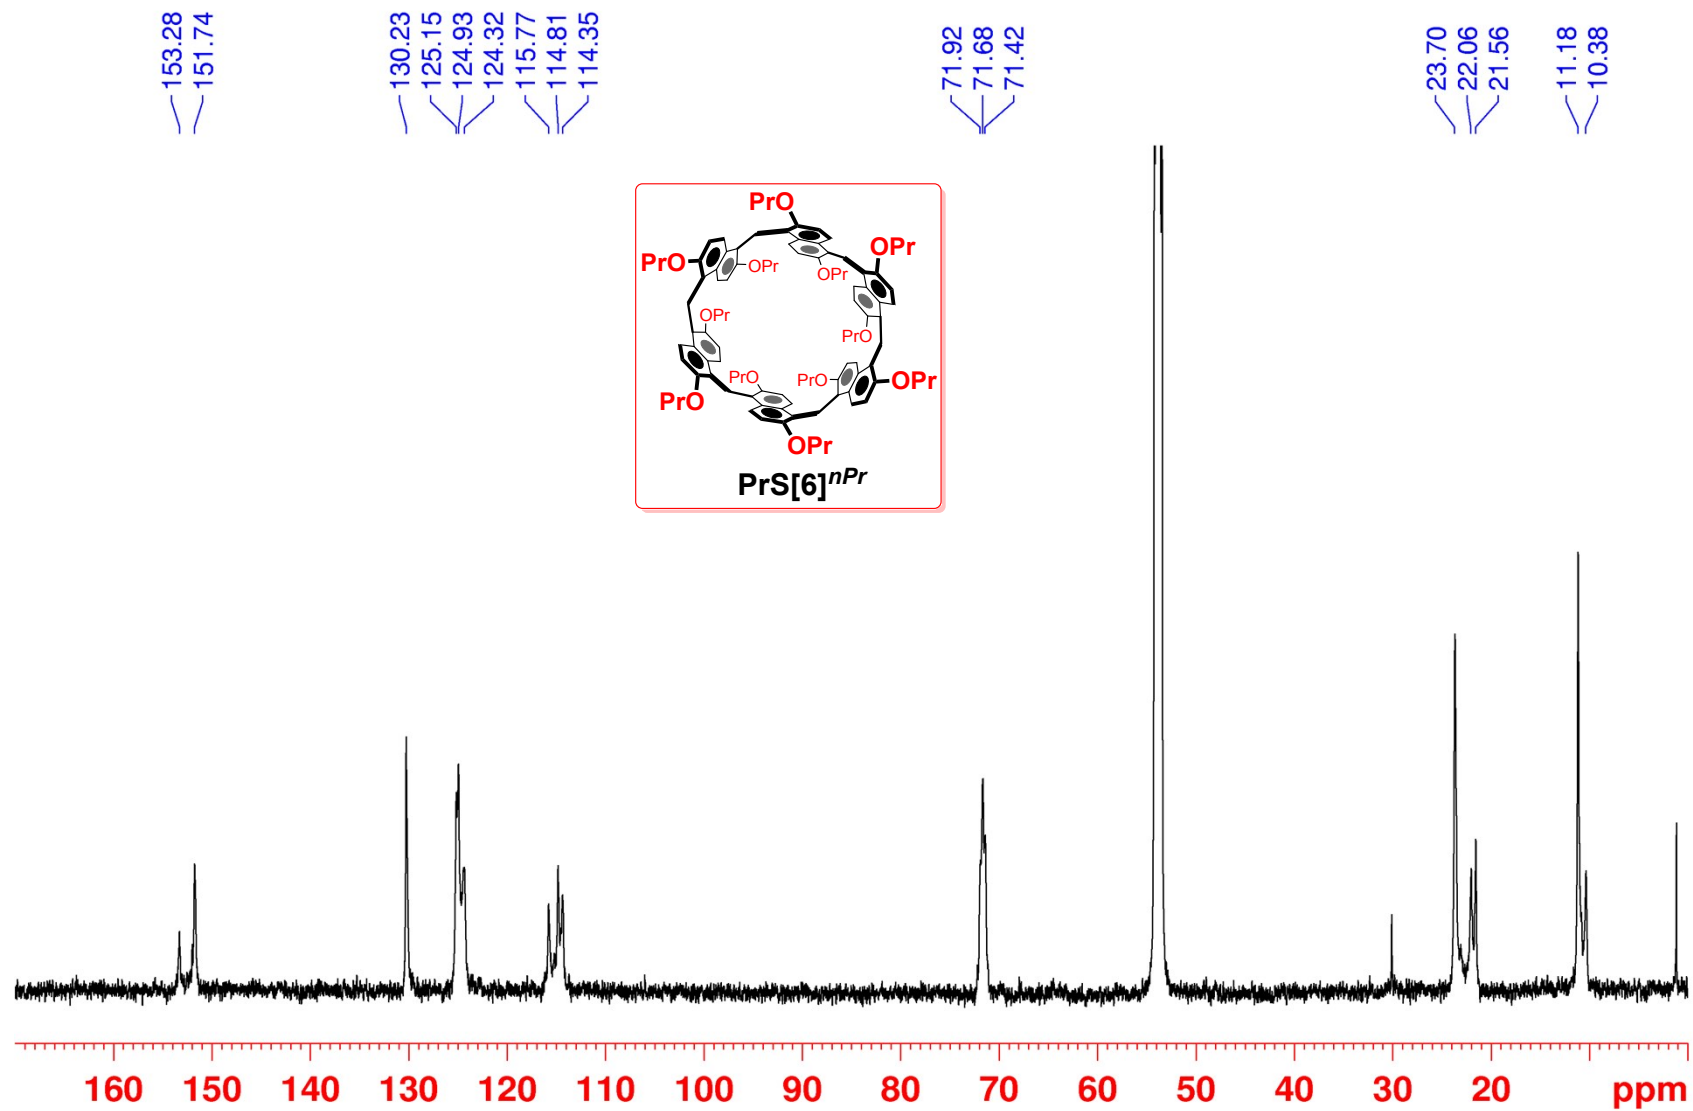

Figure S15:  $^{13}\text{C}$  NMR spectra of  $\text{PrS}[6]^{nPr}$  ( $\text{CD}_2\text{Cl}_2$ , 150 MHz, 298 K).

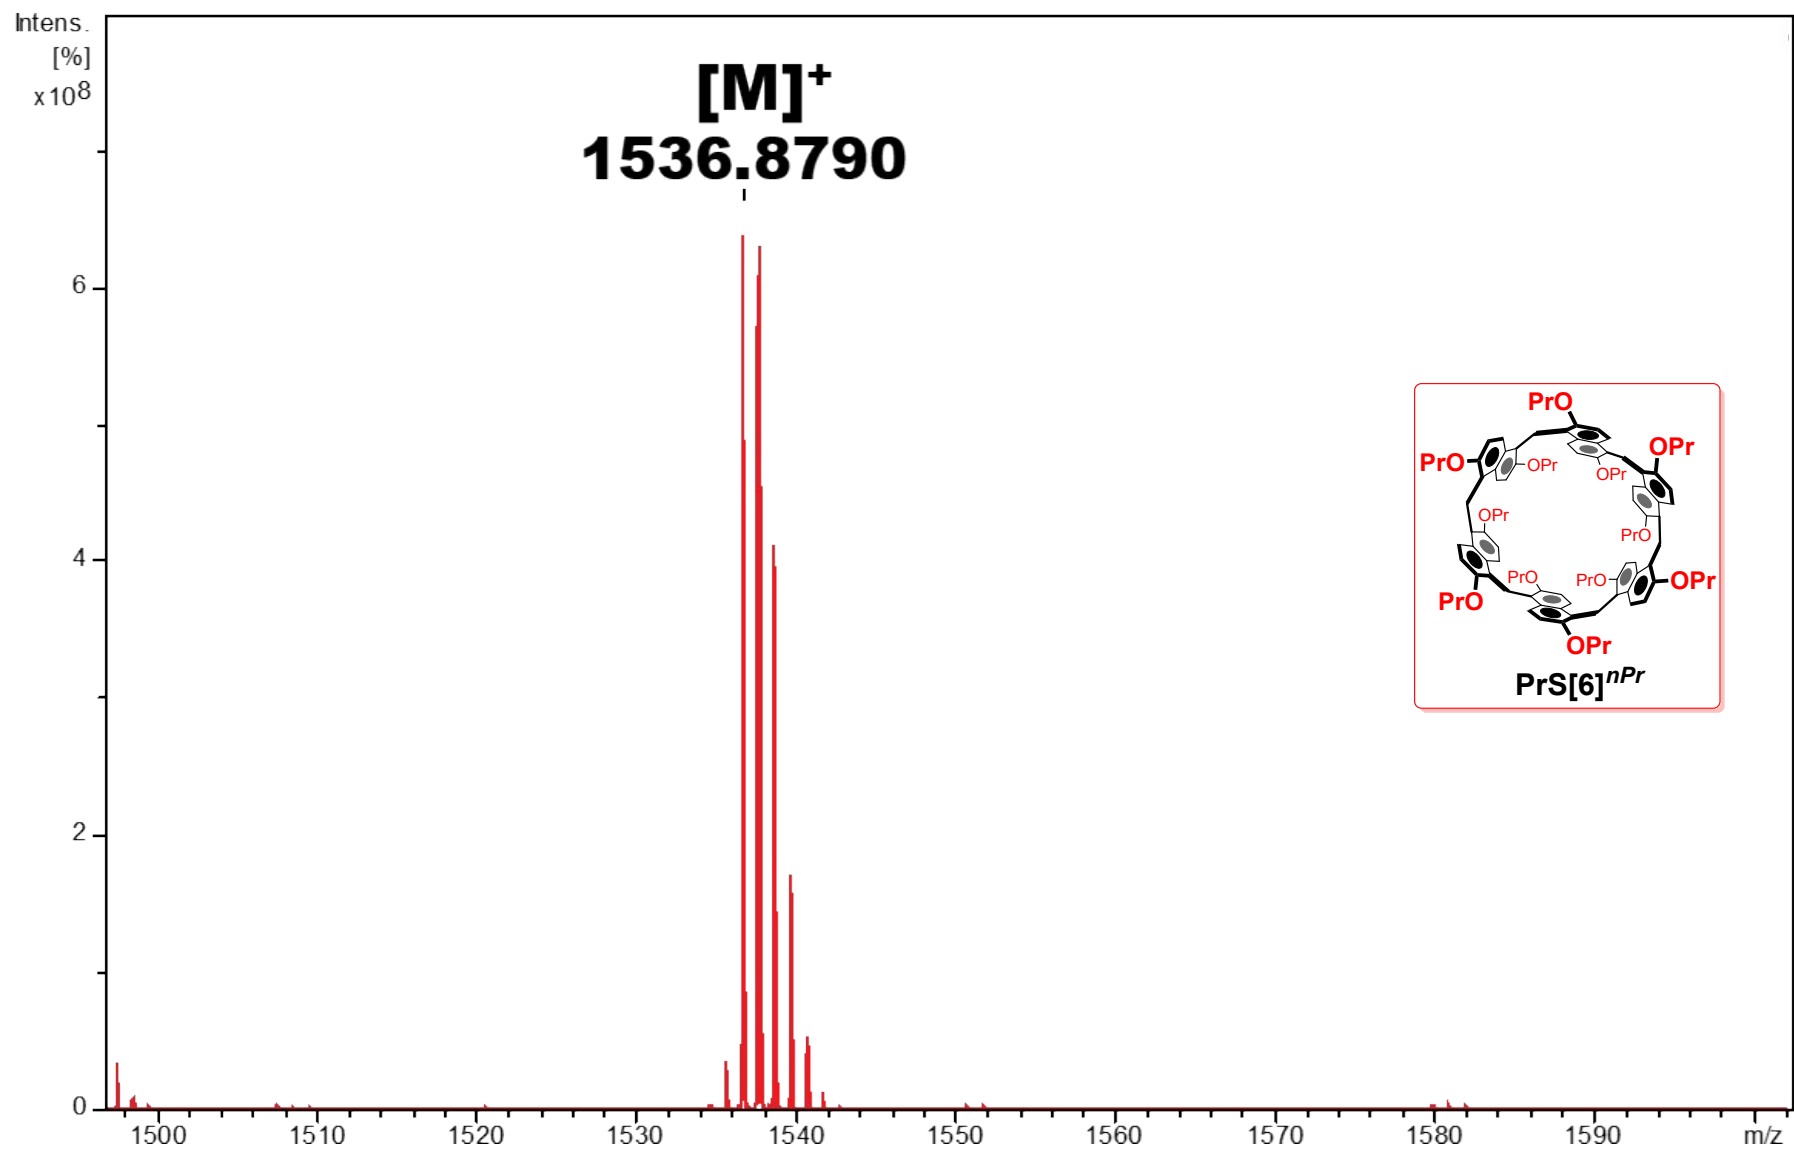

**Figure S16:** Significant portion of the HR MALDI FT-ICR mass spectrum of  $\text{PrS}[6]^{nPr} [M]^+$ .

Copies of NMR and HR mass spectrum of PrS[6]<sup>nBu</sup>

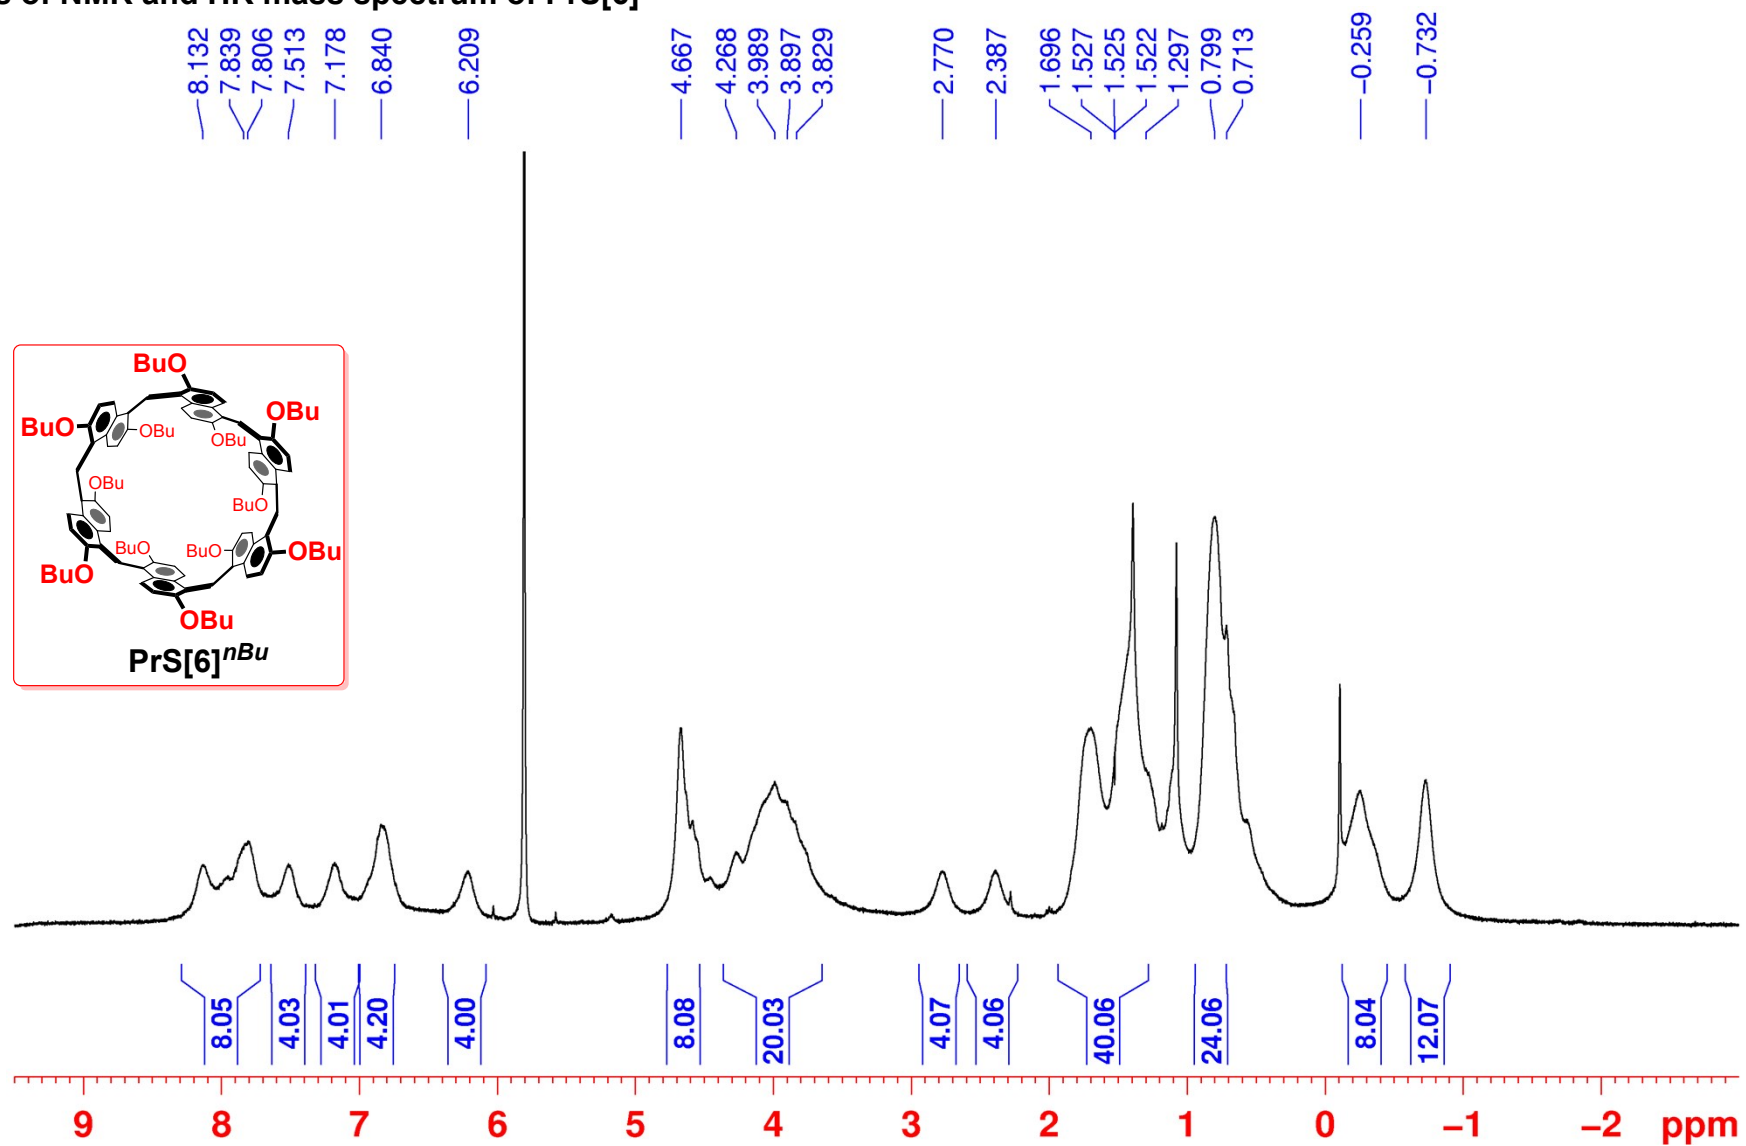

Figure S17: <sup>1</sup>H NMR spectrum of PrS[6]<sup>nBu</sup> (TCDE, 400 MHz, 298 K).

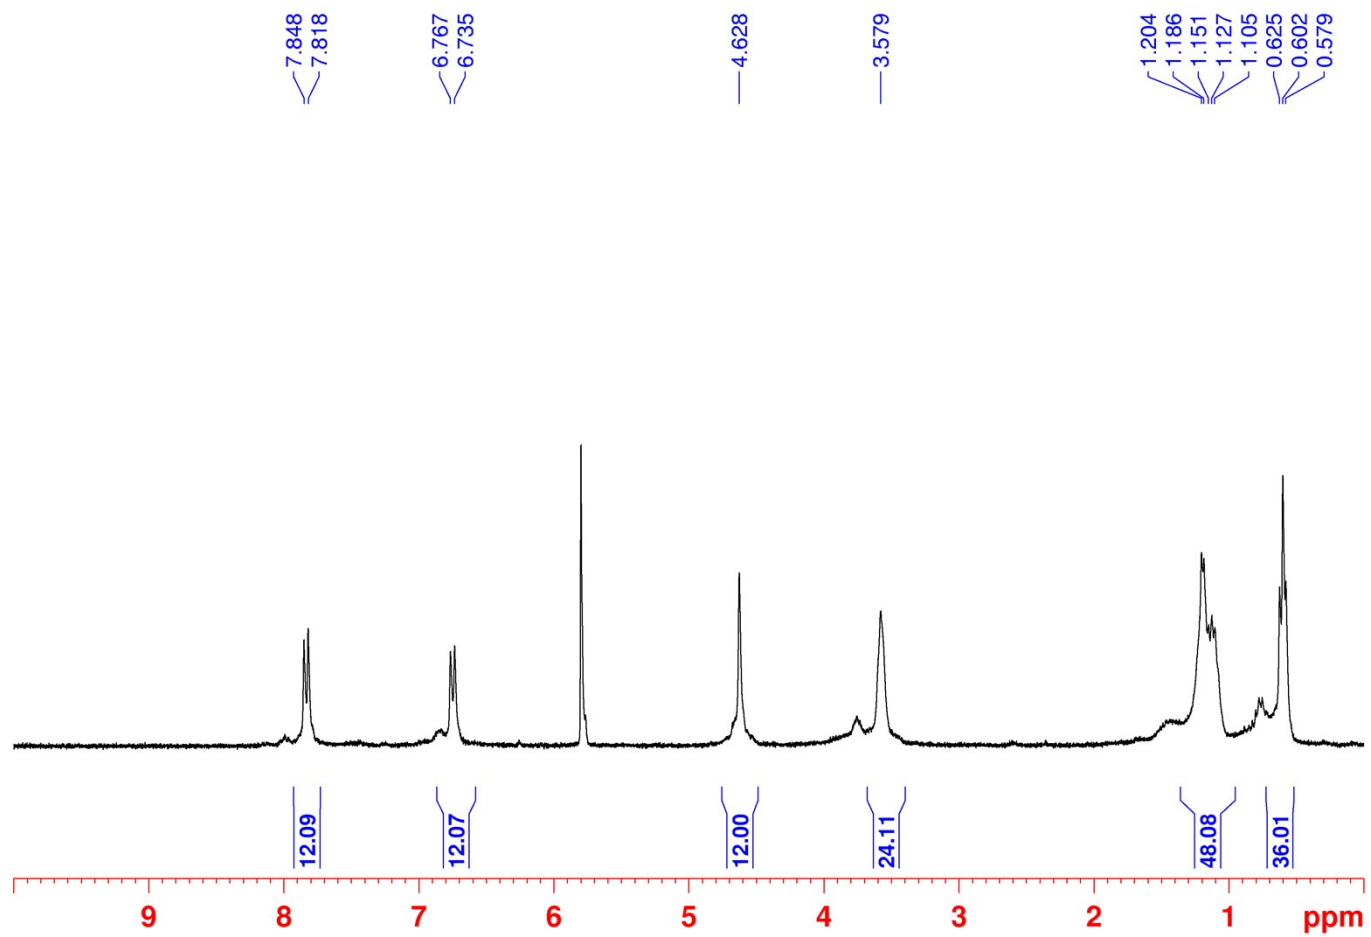

Figure S18: <sup>1</sup>H NMR spectrum of PrS[6]<sup>nBu</sup> (TCDE, 400 MHz, 393 K).

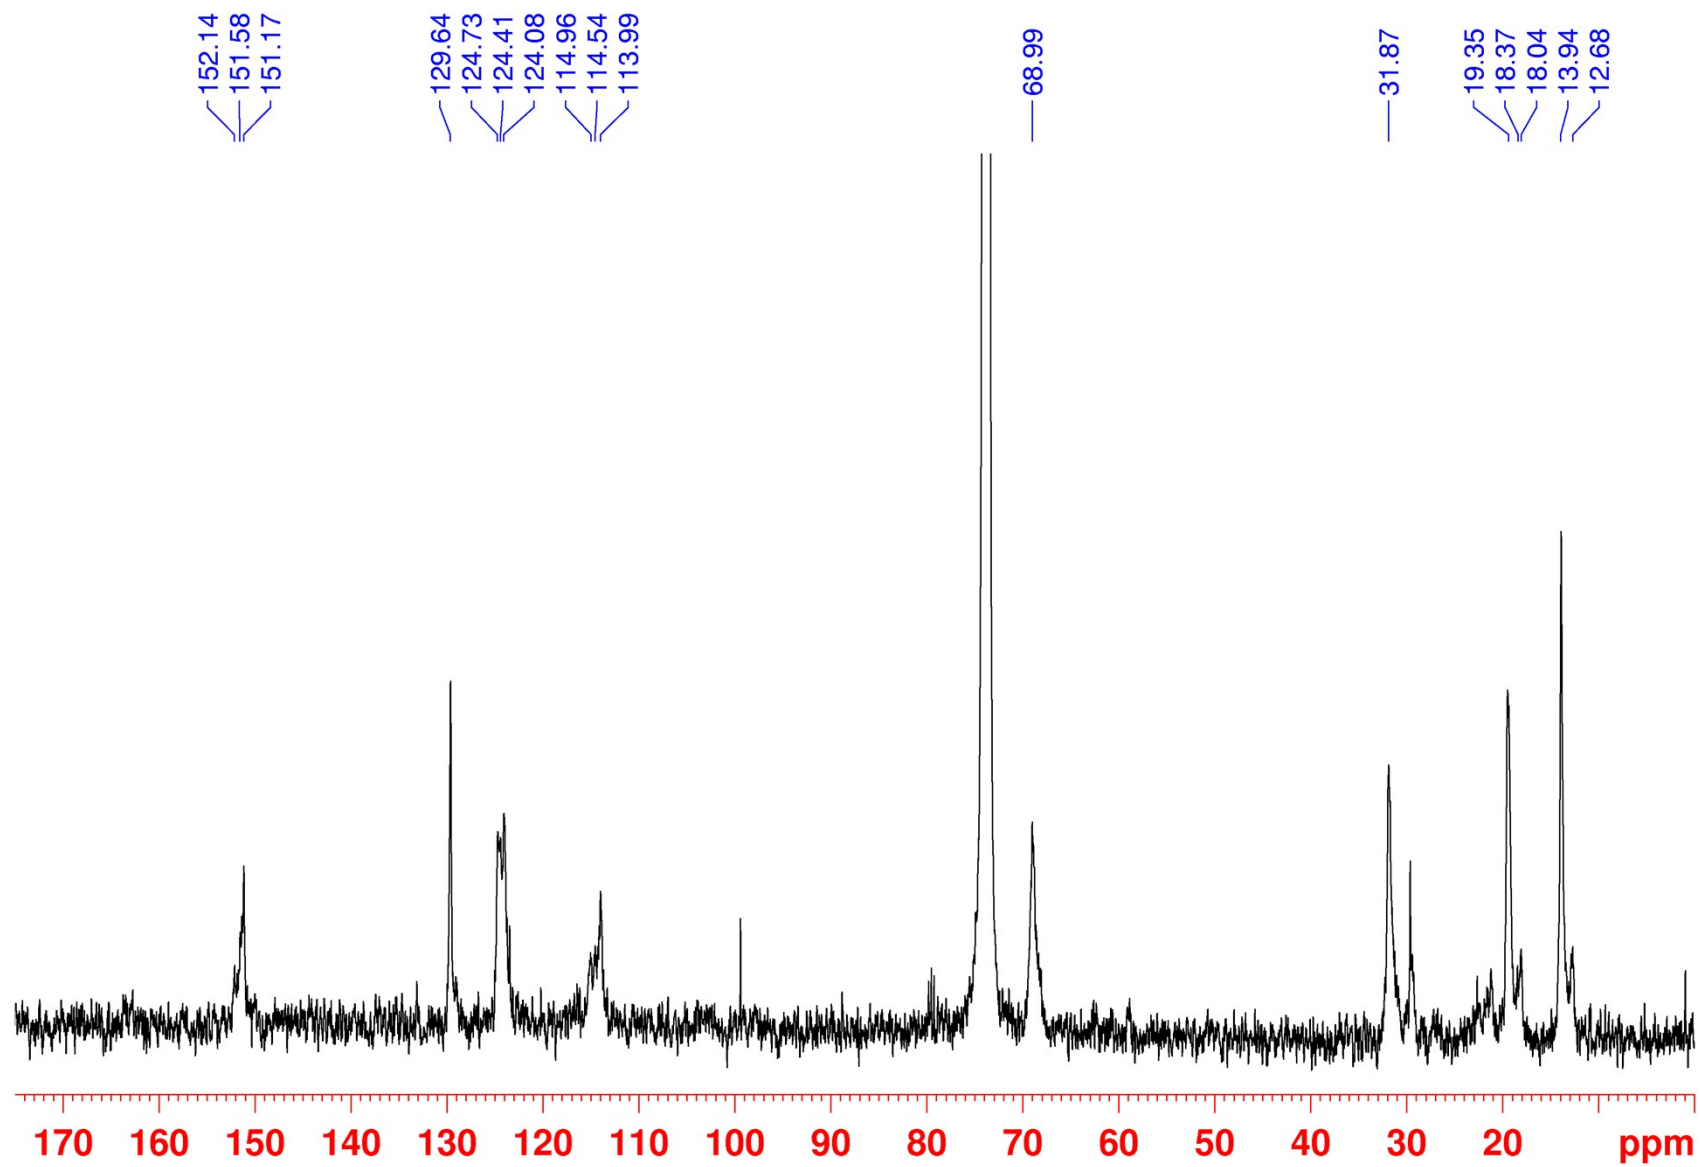

Figure S19:  $^{13}\text{C}$  NMR spectra of  $\text{PrS}[6]^{n\text{Bu}}$  (TCDE, 100 MHz, 298 K).



Copies of NMR and HR mass spectrum of PrS[6]<sup>nPn</sup>

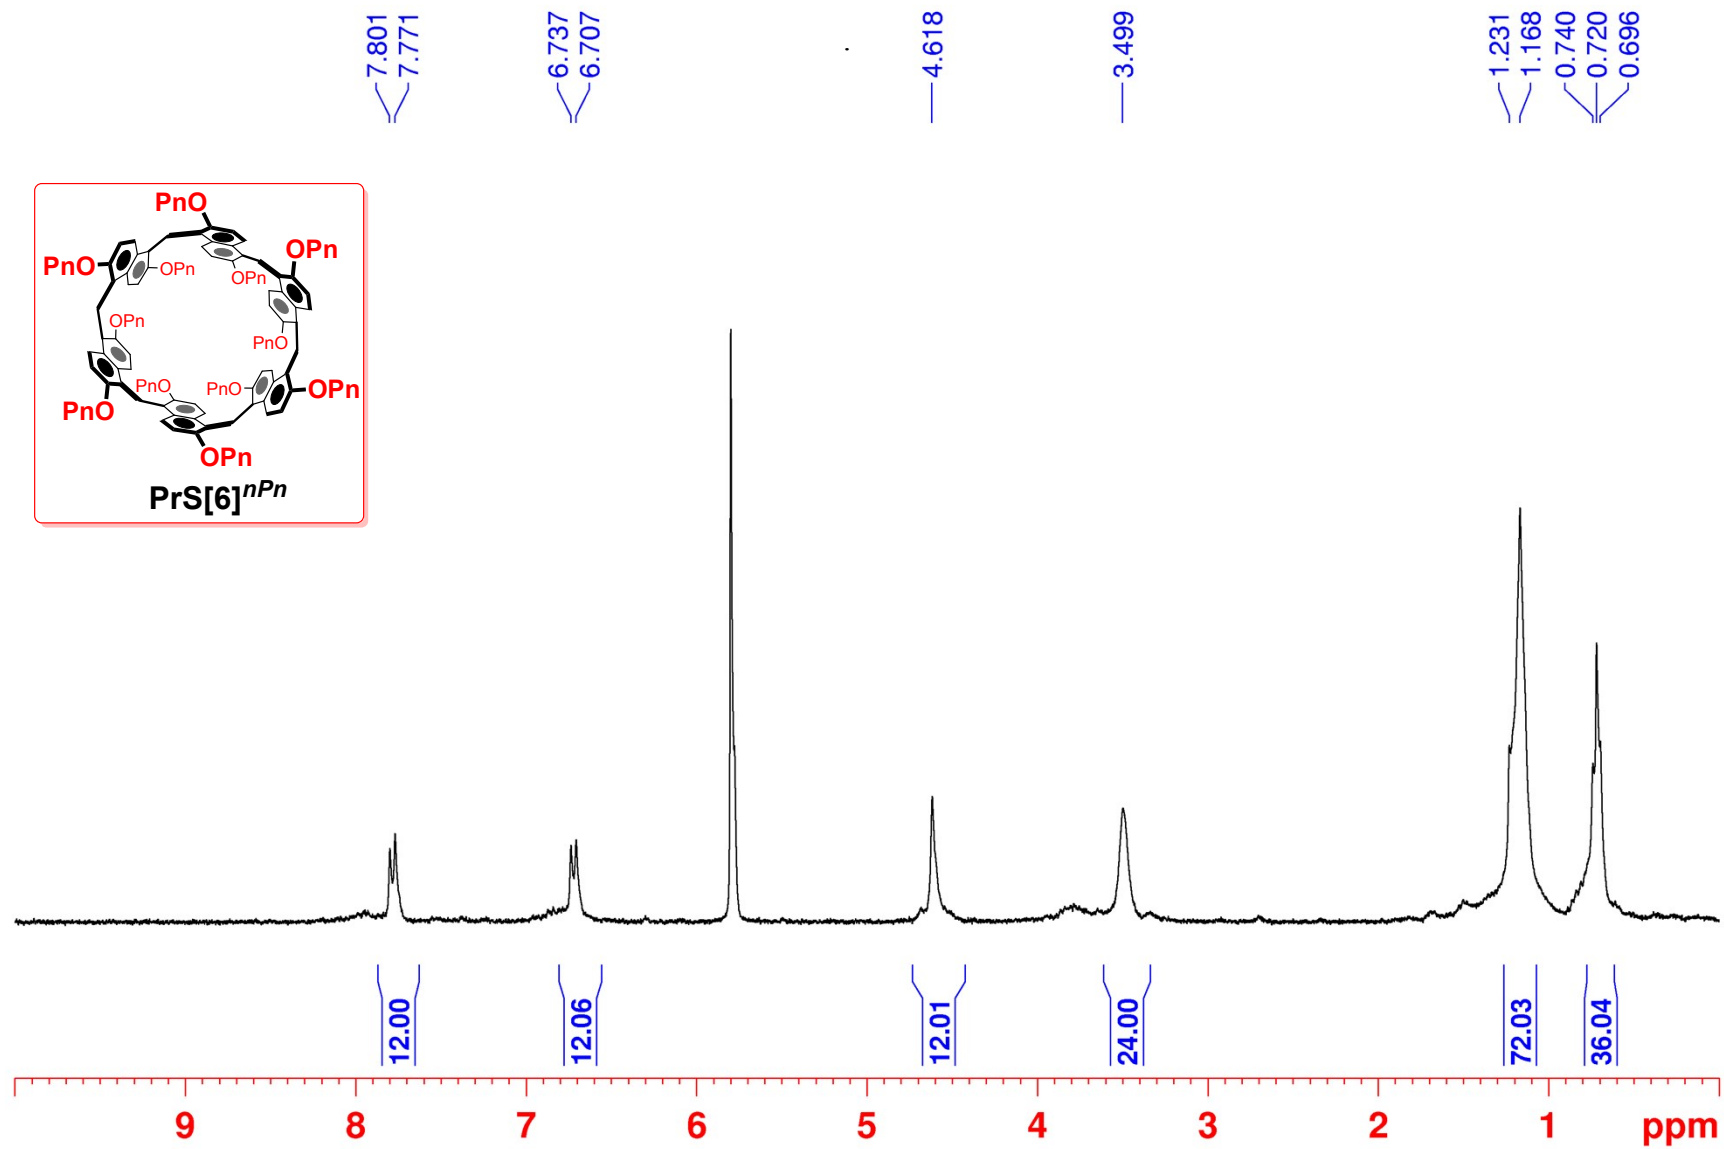

Figure S20: <sup>1</sup>H NMR spectrum of PrS[6]<sup>nPn</sup> (TCDE, 300 MHz, 393 K).

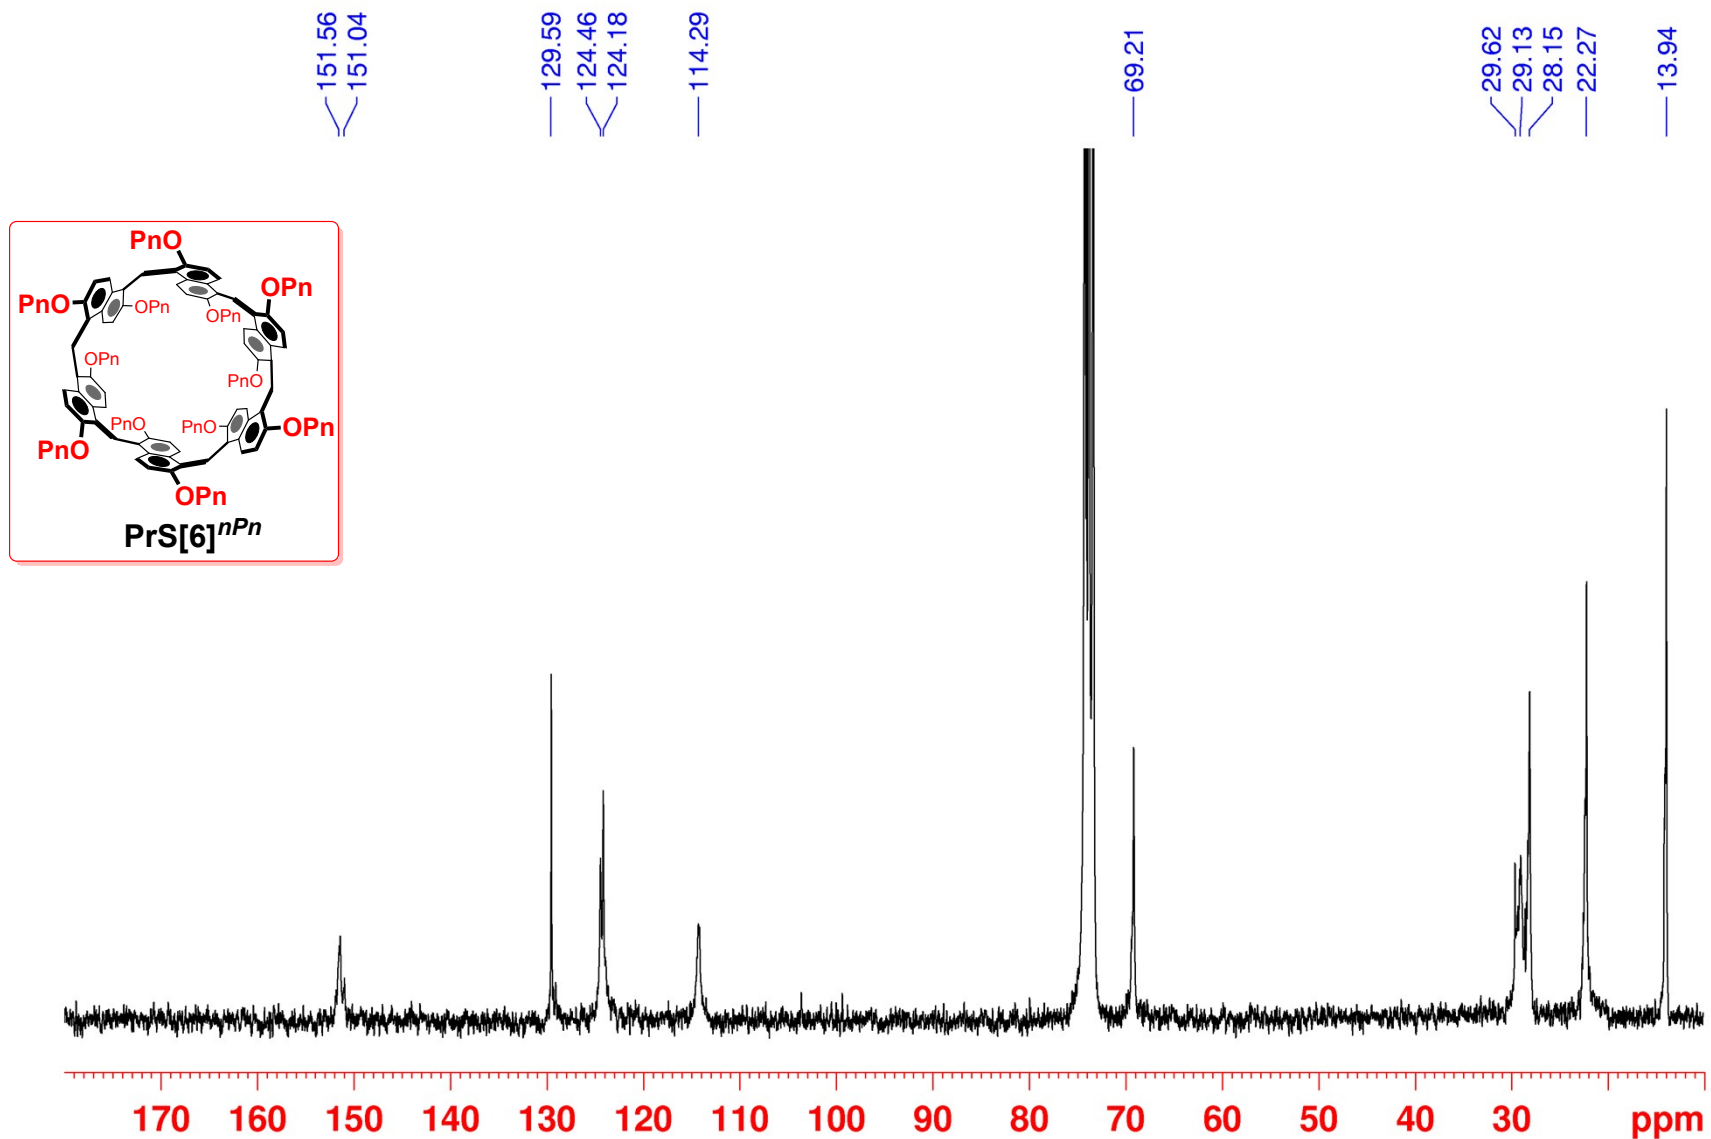

Figure S21:  $^{13}\text{C}$  NMR spectra of  $\text{PrS}[6]^{n\text{Pr}}$  (TCDE, 62.5 MHz, 298 K).

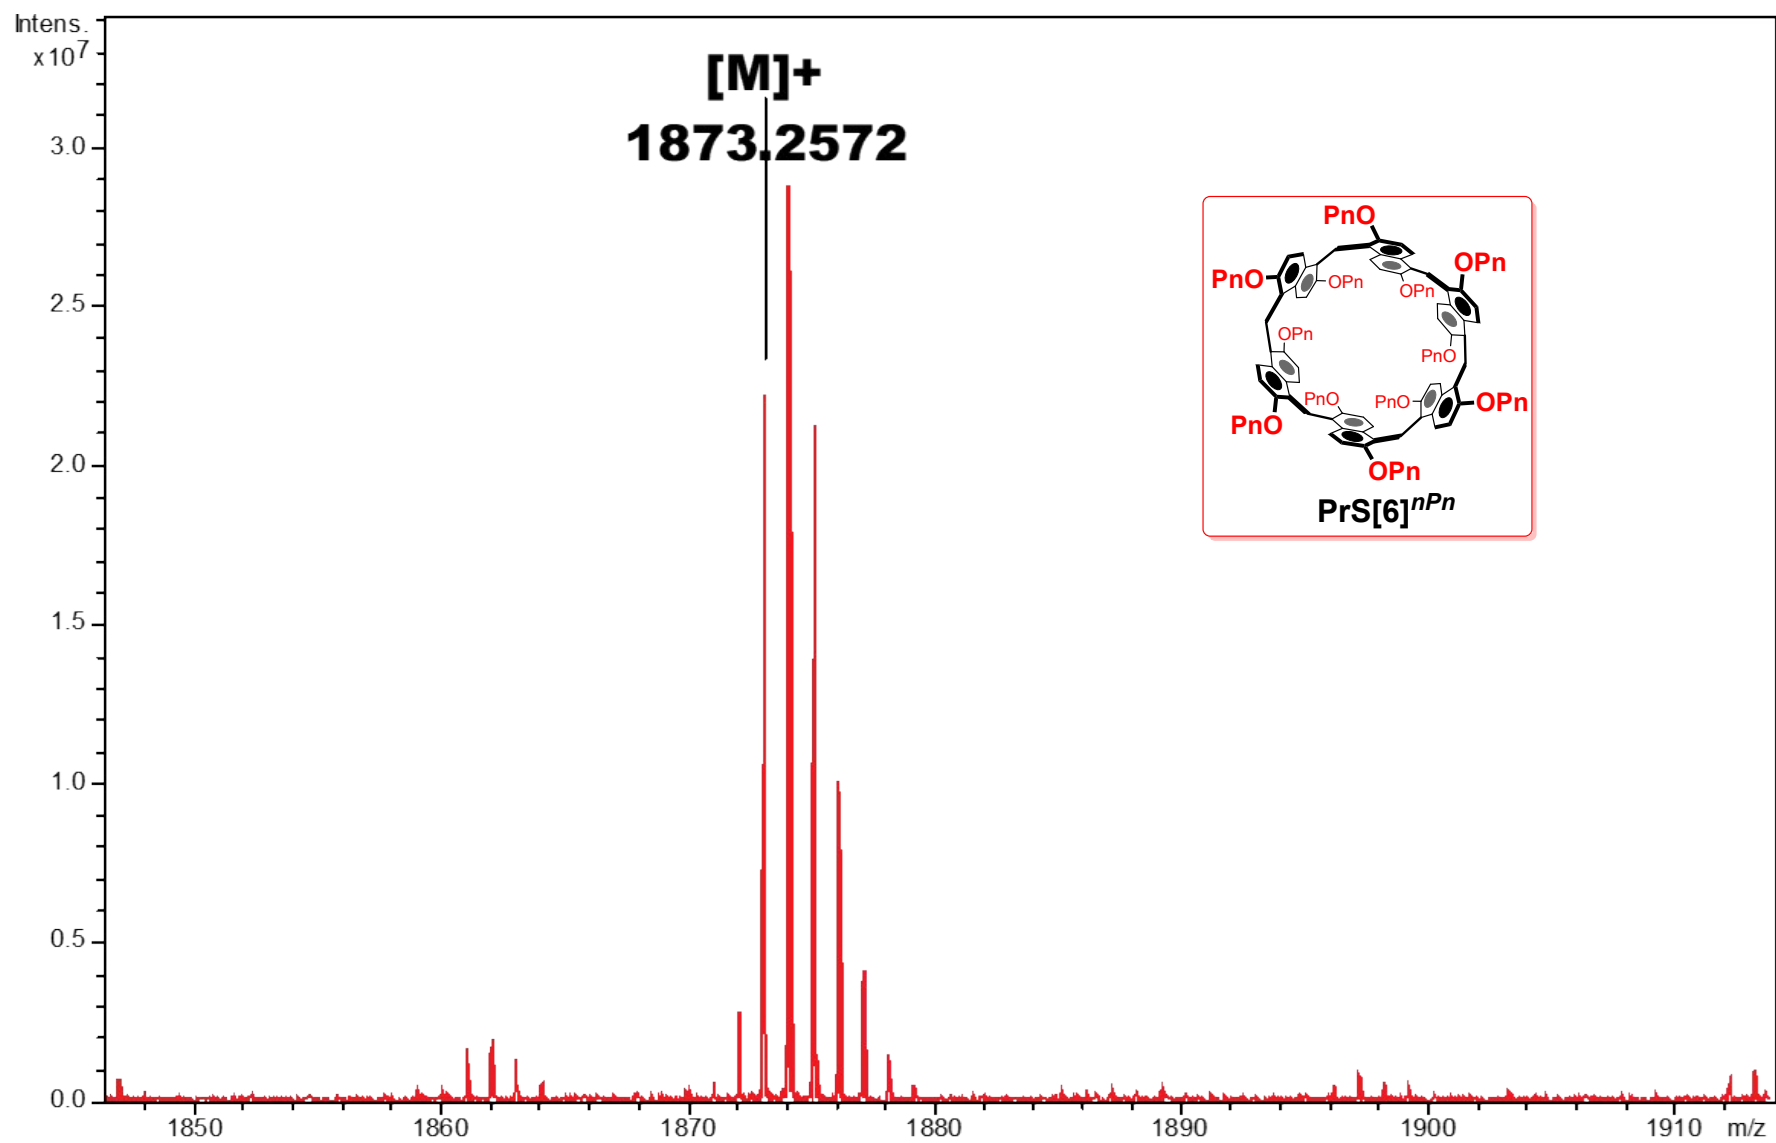

**Figure S22:** Significant portion of the HR MALDI FT-ICR mass spectrum of  $\text{PrS}[6]^{nPn} [M]^+$ .

# Low temperature 1D and 2D NMR spectra of PrS[6]<sup>Et</sup>

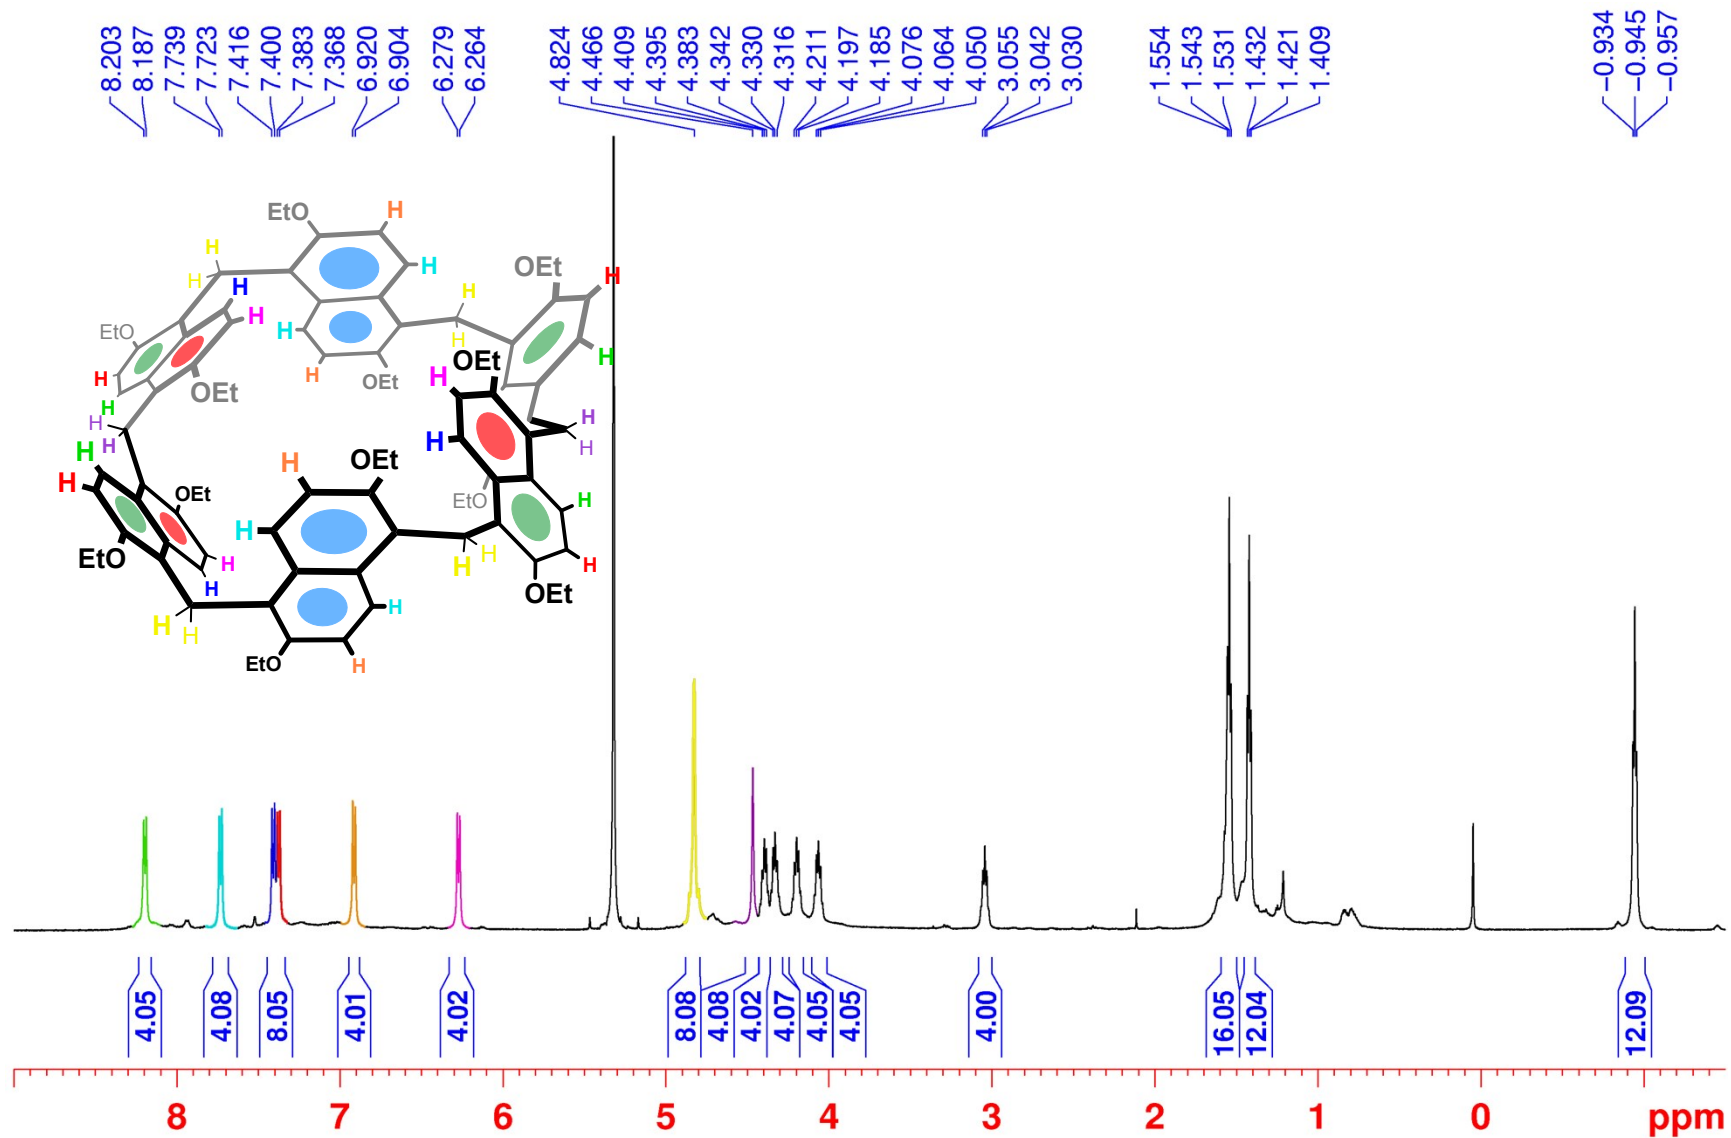

Figure S23: <sup>1</sup>H NMR spectrum of PrS[6]<sup>Et</sup> (CD<sub>2</sub>Cl<sub>2</sub>, 600 MHz, 243 K).

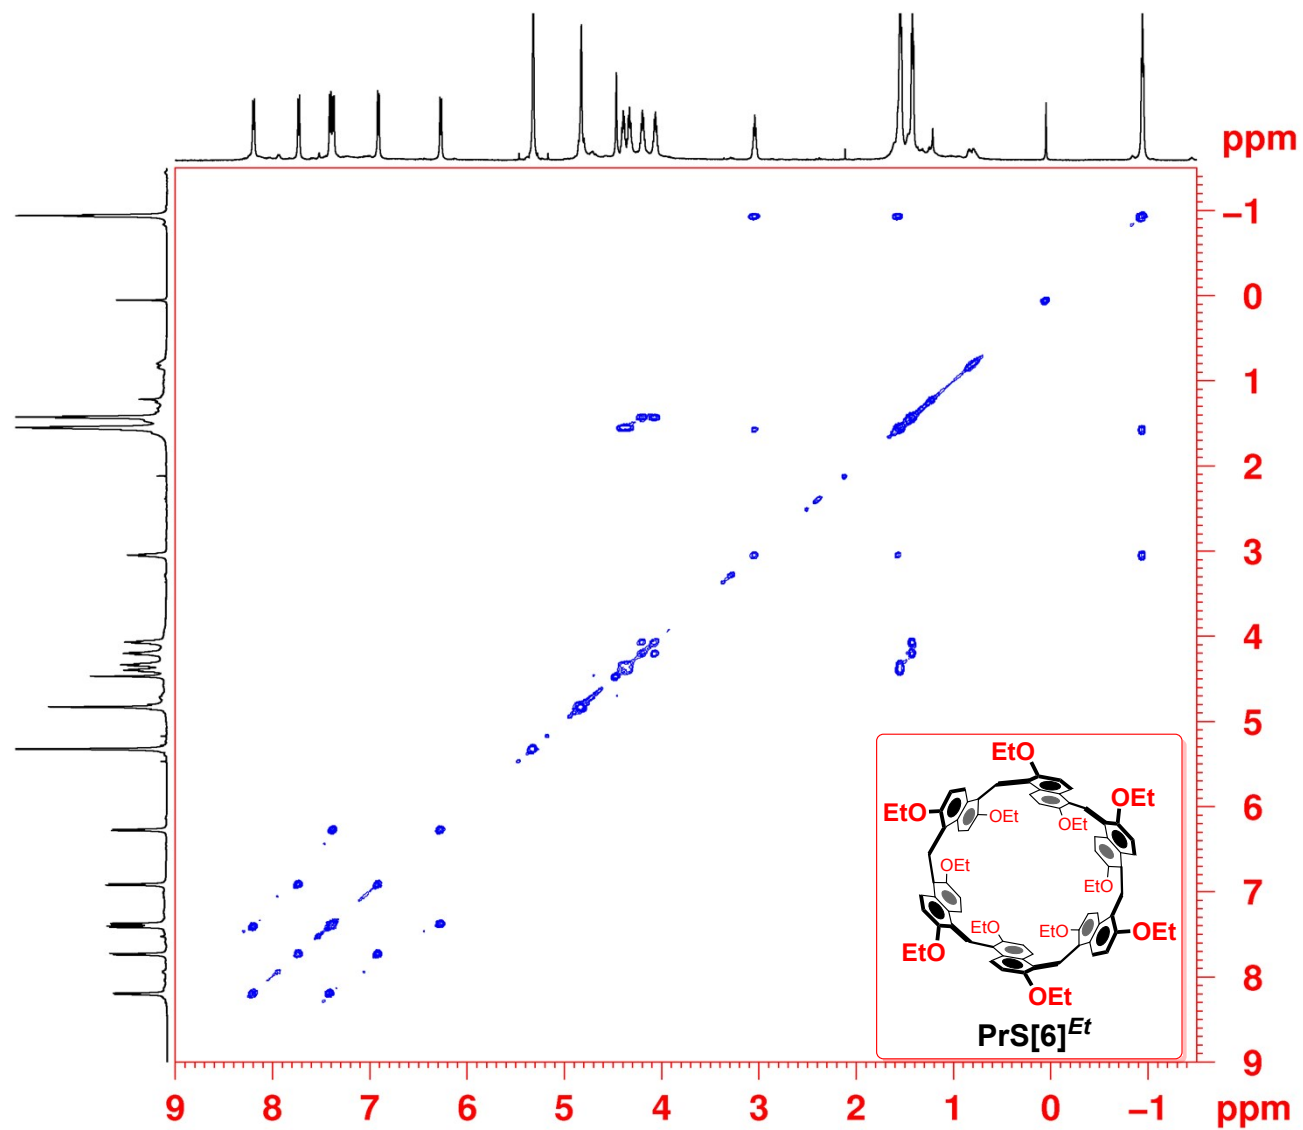

Figure S24: 2D-DQF COSY spectrum of  $\text{PrS}[6]^{\text{Et}}$  ( $\text{CD}_2\text{Cl}_2$ , 600 MHz, 243 K).

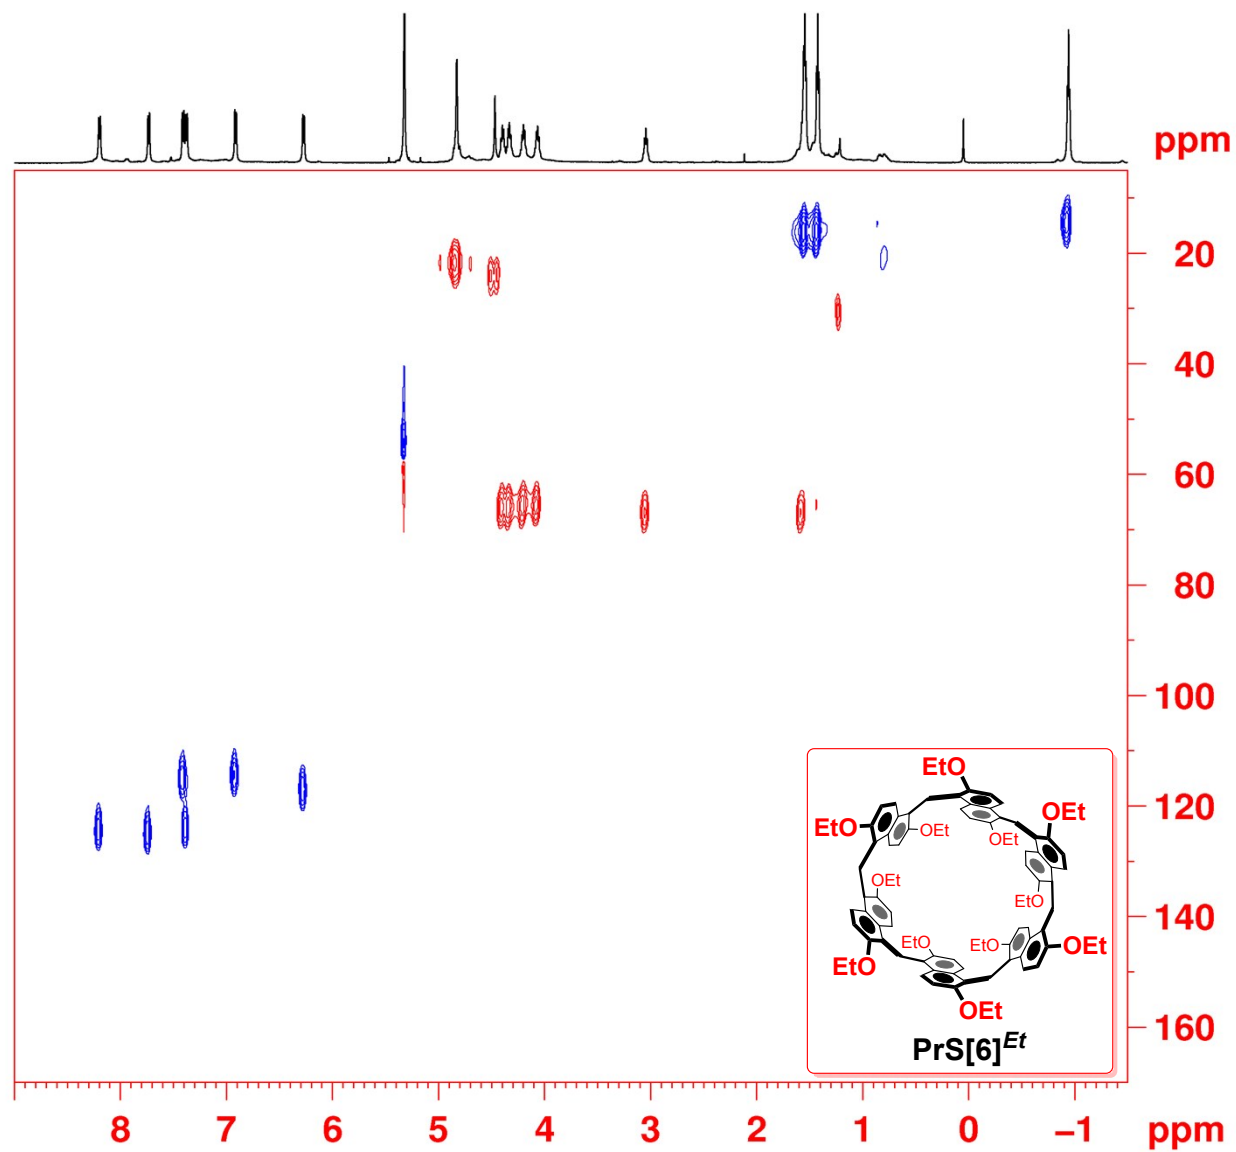

Figure S25: 2D-HSQC spectrum of  $\text{PrS}[6]^{\text{Et}}$  ( $\text{CD}_2\text{Cl}_2$ , 600 MHz, 243 K).

# Low temperature 1D and 2D NMR spectra of PrS[6]<sup>nPr</sup>

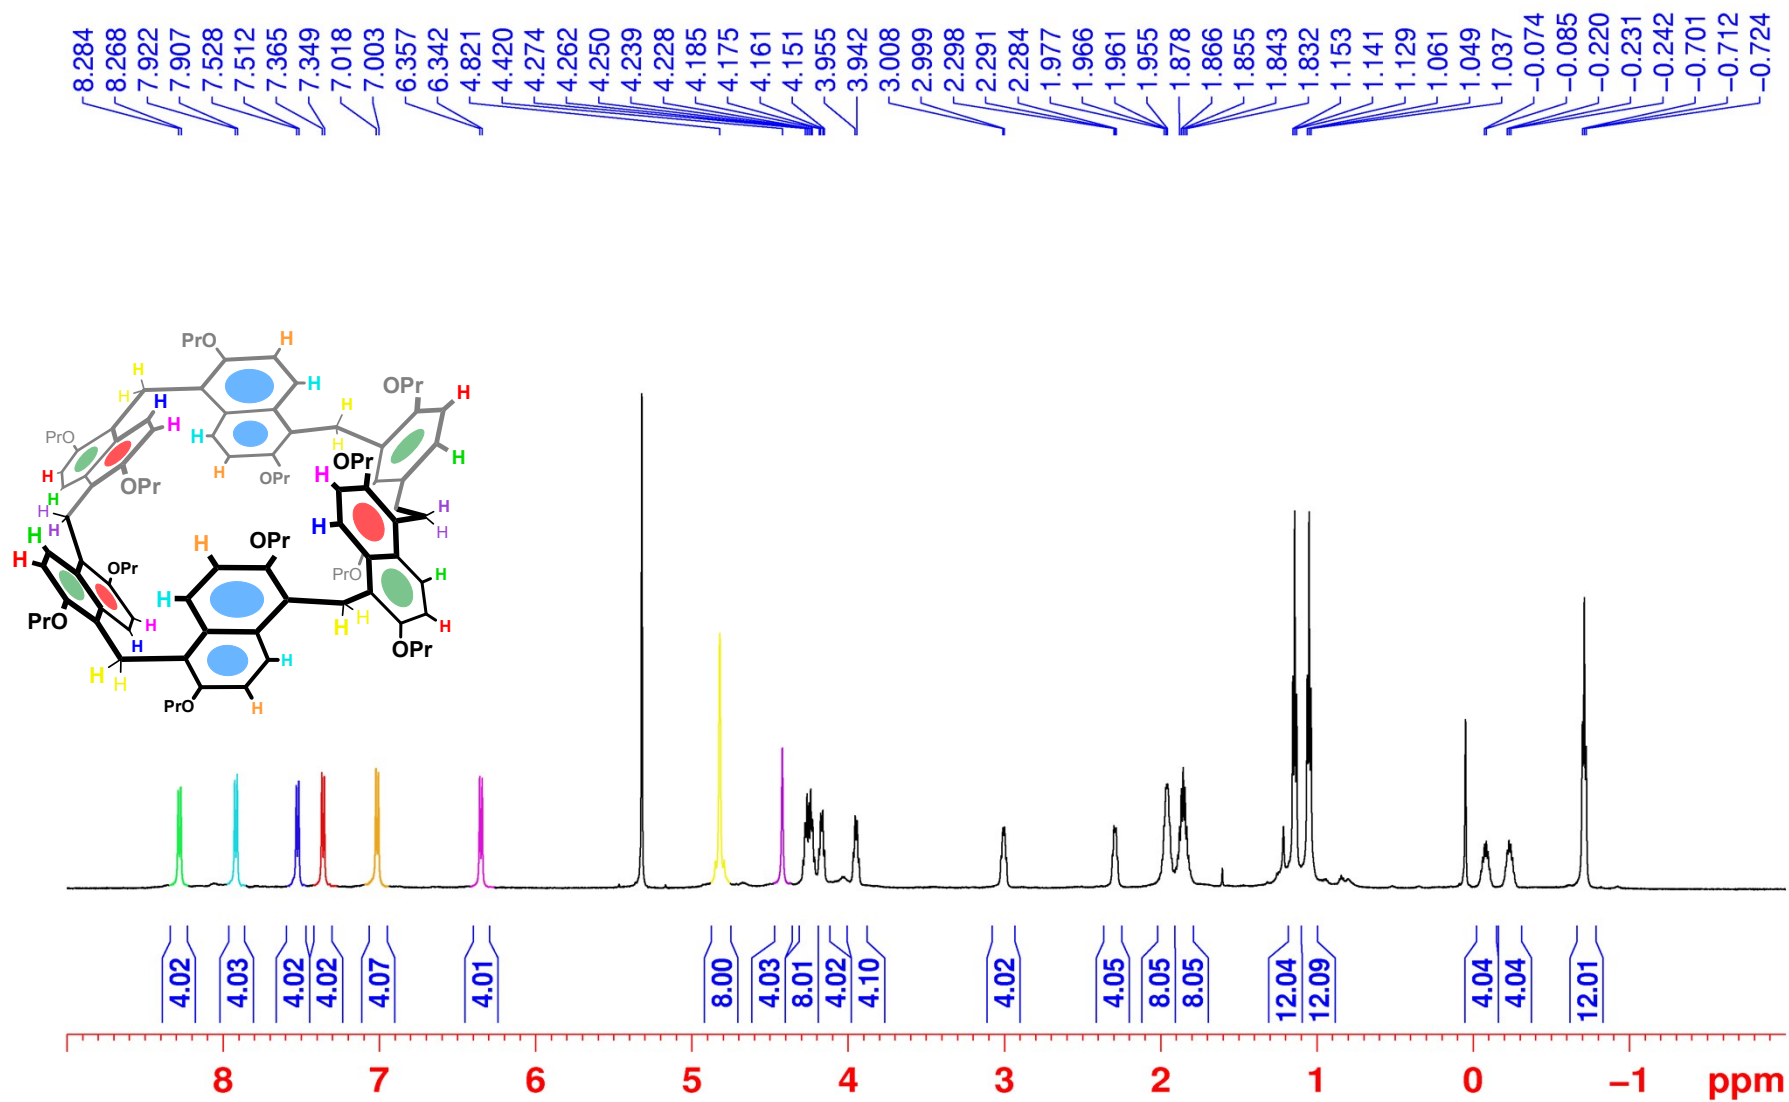

Figure S26: <sup>1</sup>H NMR spectrum of PrS[6]<sup>nPr</sup> (CD<sub>2</sub>Cl<sub>2</sub>, 600 MHz, 243 K).

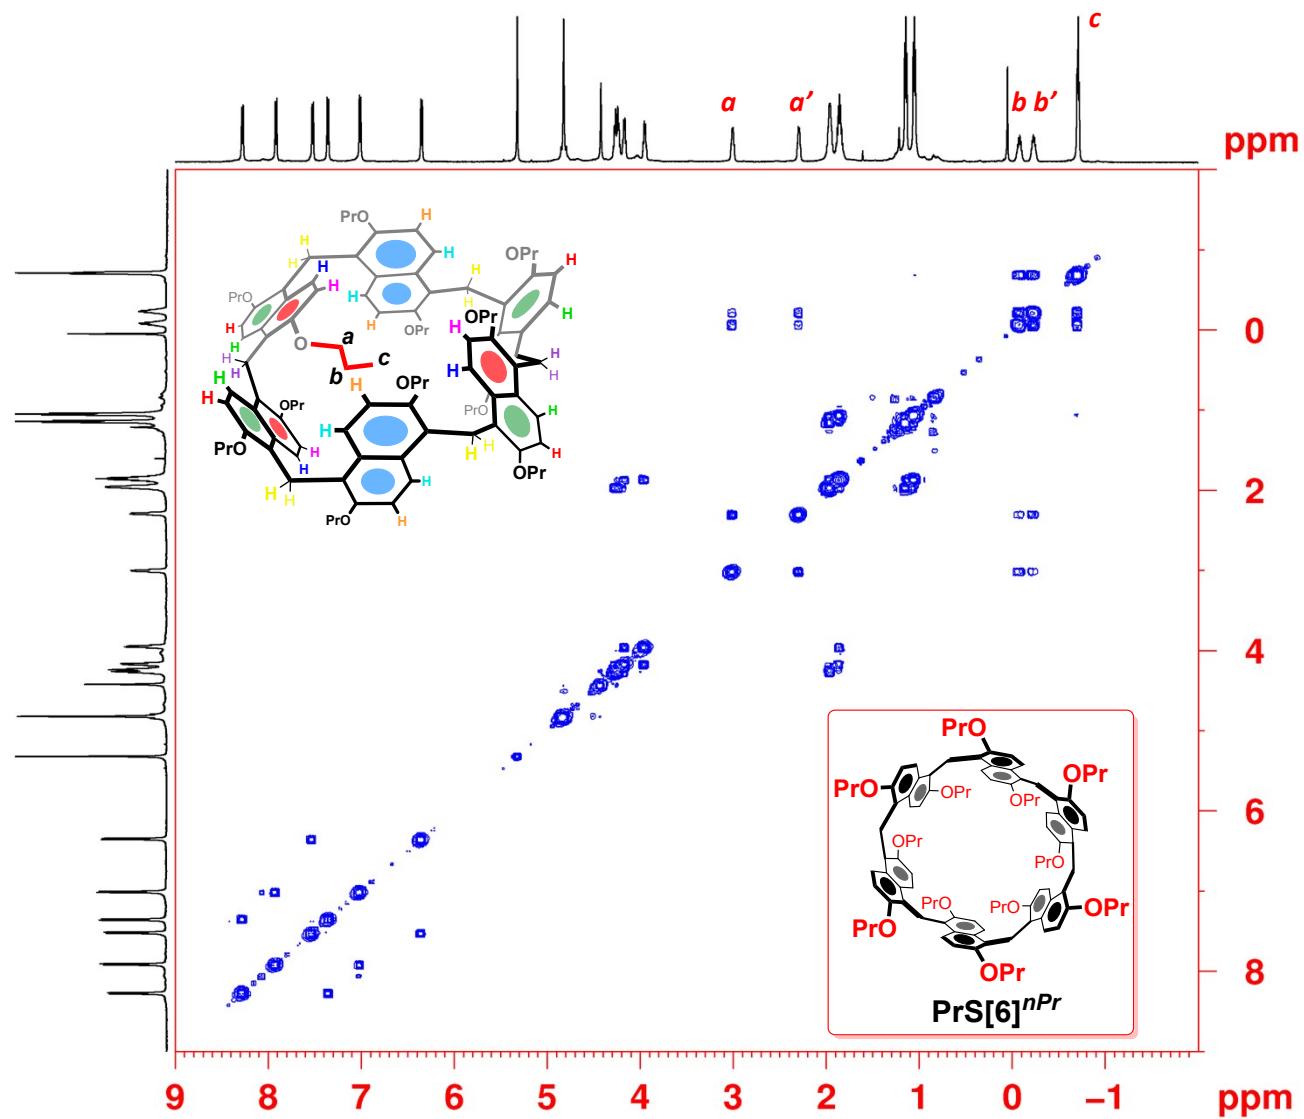

Figure S27: 2D-DQF COSY spectrum of  $\text{PrS}[6]^{n\text{Pr}}$  ( $\text{CD}_2\text{Cl}_2$ , 600 MHz, 243 K).



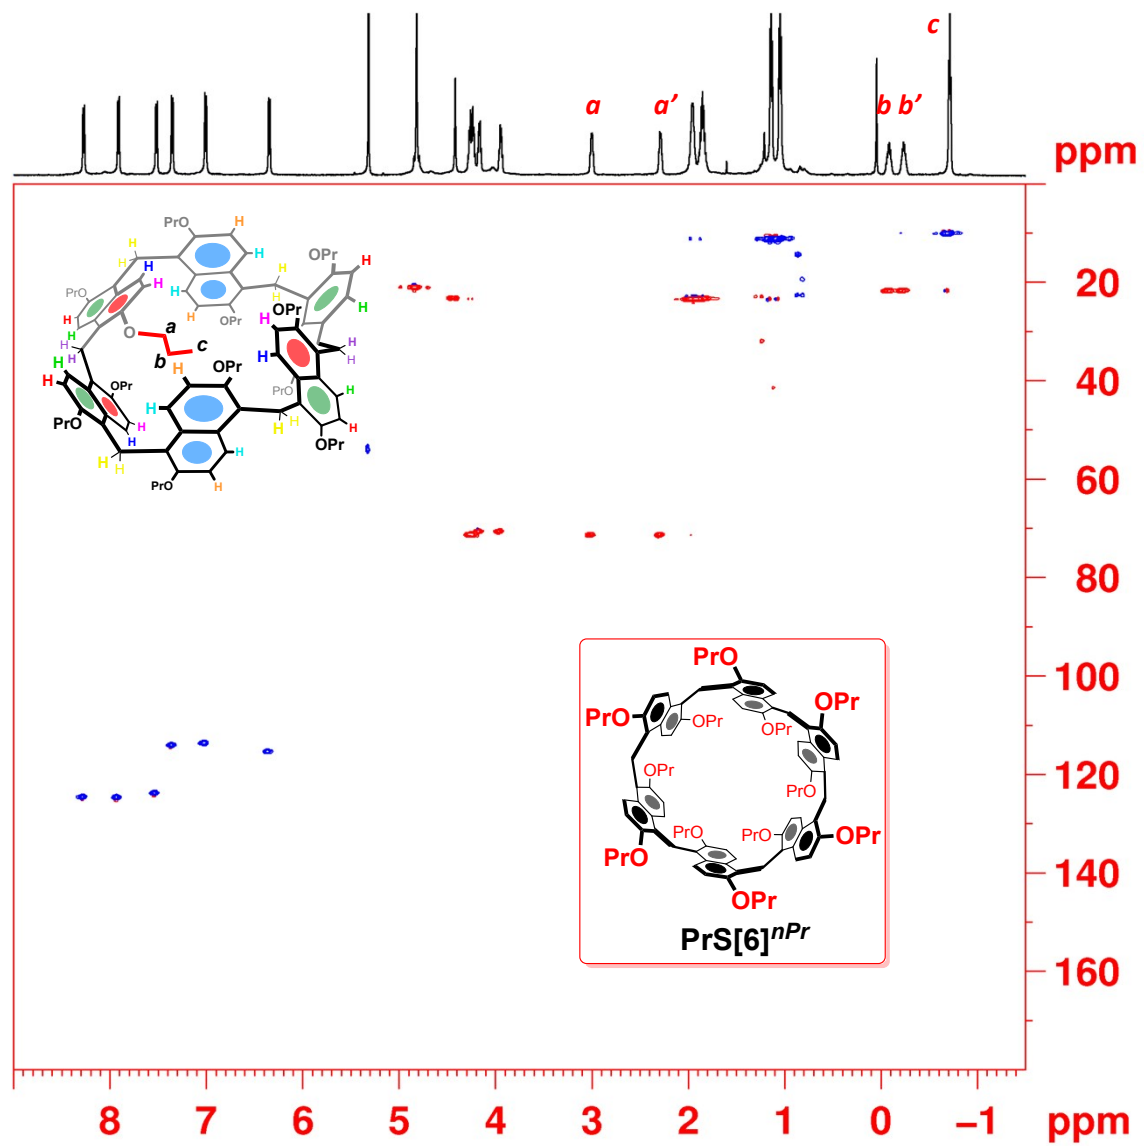

Figure S28: 2D-HSQC spectrum of  $\text{PrS}[6]^{n\text{Pr}}$  ( $\text{CD}_2\text{Cl}_2$ , 600 MHz, 243 K).

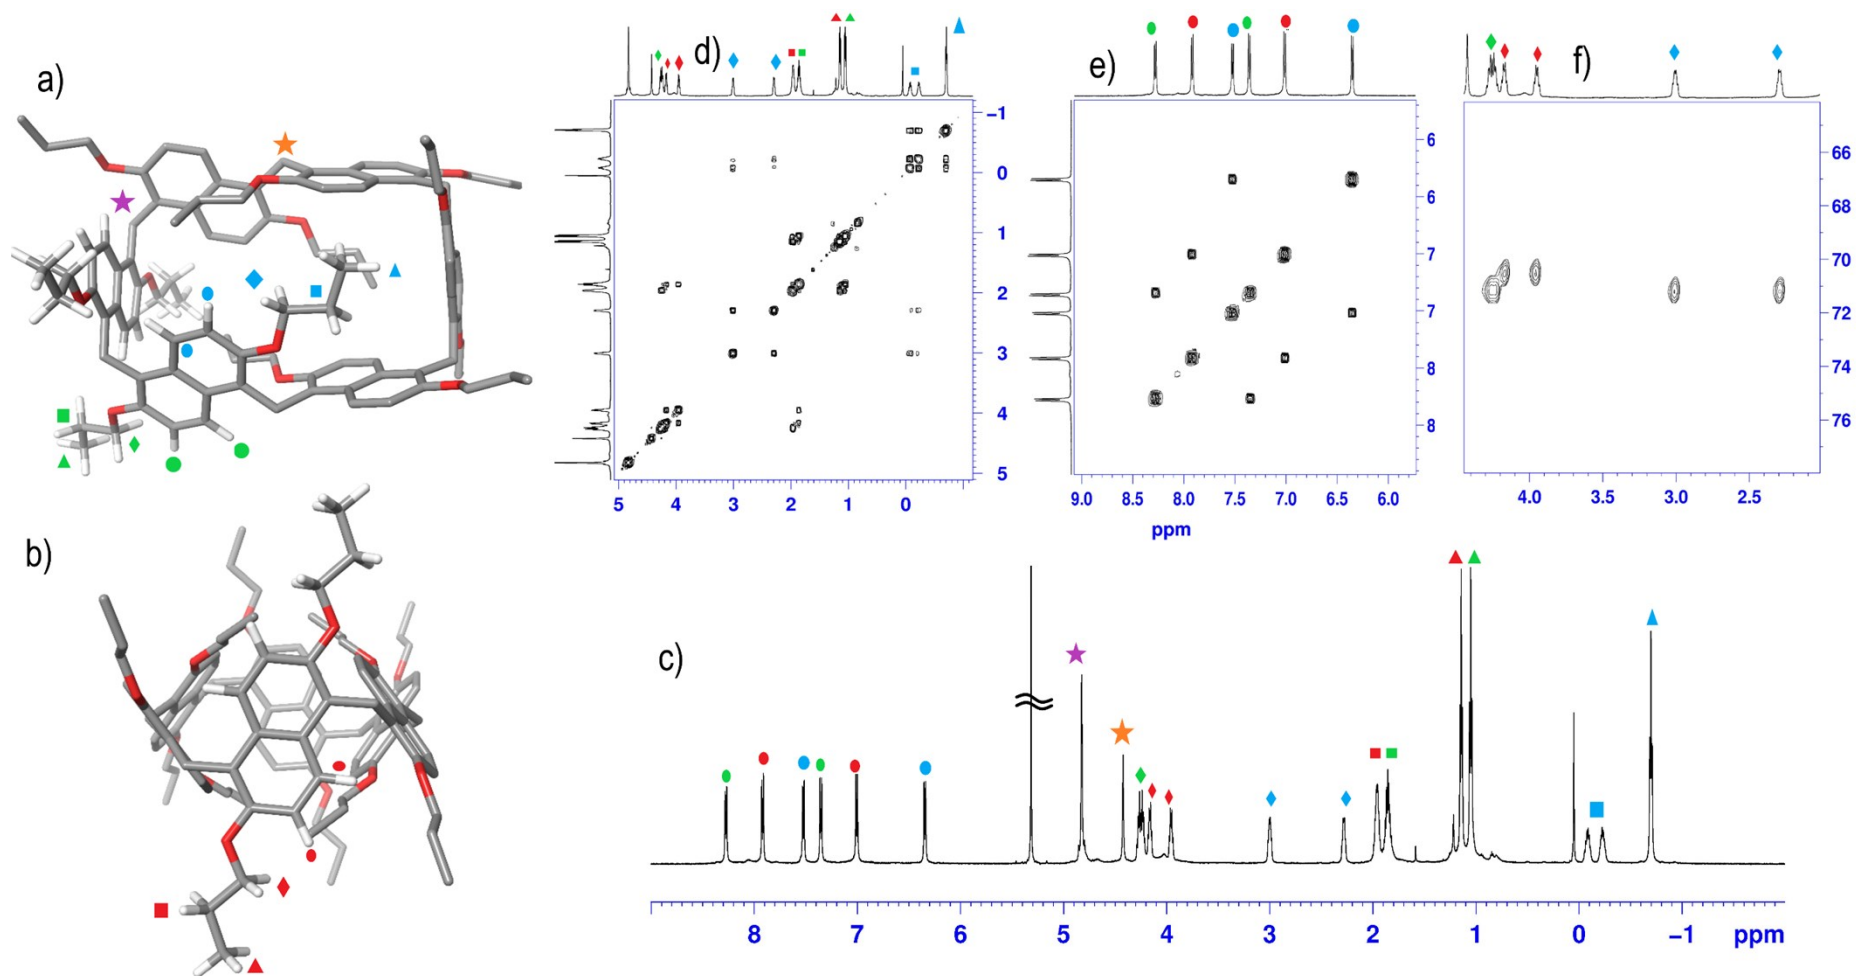

**Figure S29.** (a and b) Different views of the DFT-optimized structure of  $\text{PrS}[6]^{nPr}$  at the B97D3/SVP/SVPFIT level of theory. (c)  $^1\text{H}$  NMR spectrum of  $\text{PrS}[6]^{nPr}$  in  $\text{CD}_2\text{Cl}_2$  at 243 K (600 MHz). (d,e) Significant portions of the 2D COSY spectrum of  $\text{PrS}[6]^{nPr}$  (600 MHz,  $\text{CD}_2\text{Cl}_2$ , 243 K). (f) Significant portions of the 2D HSQC spectrum of  $\text{PrS}[6]^{nPr}$  in which the resonances of distereotopic  $\text{OCH}_2$  groups are reported. The assignment of  $^1\text{H}$  NMR signals is indicated by the colored symbols of (a and b).

## Copies of NMR titration experiments with reaction solvents

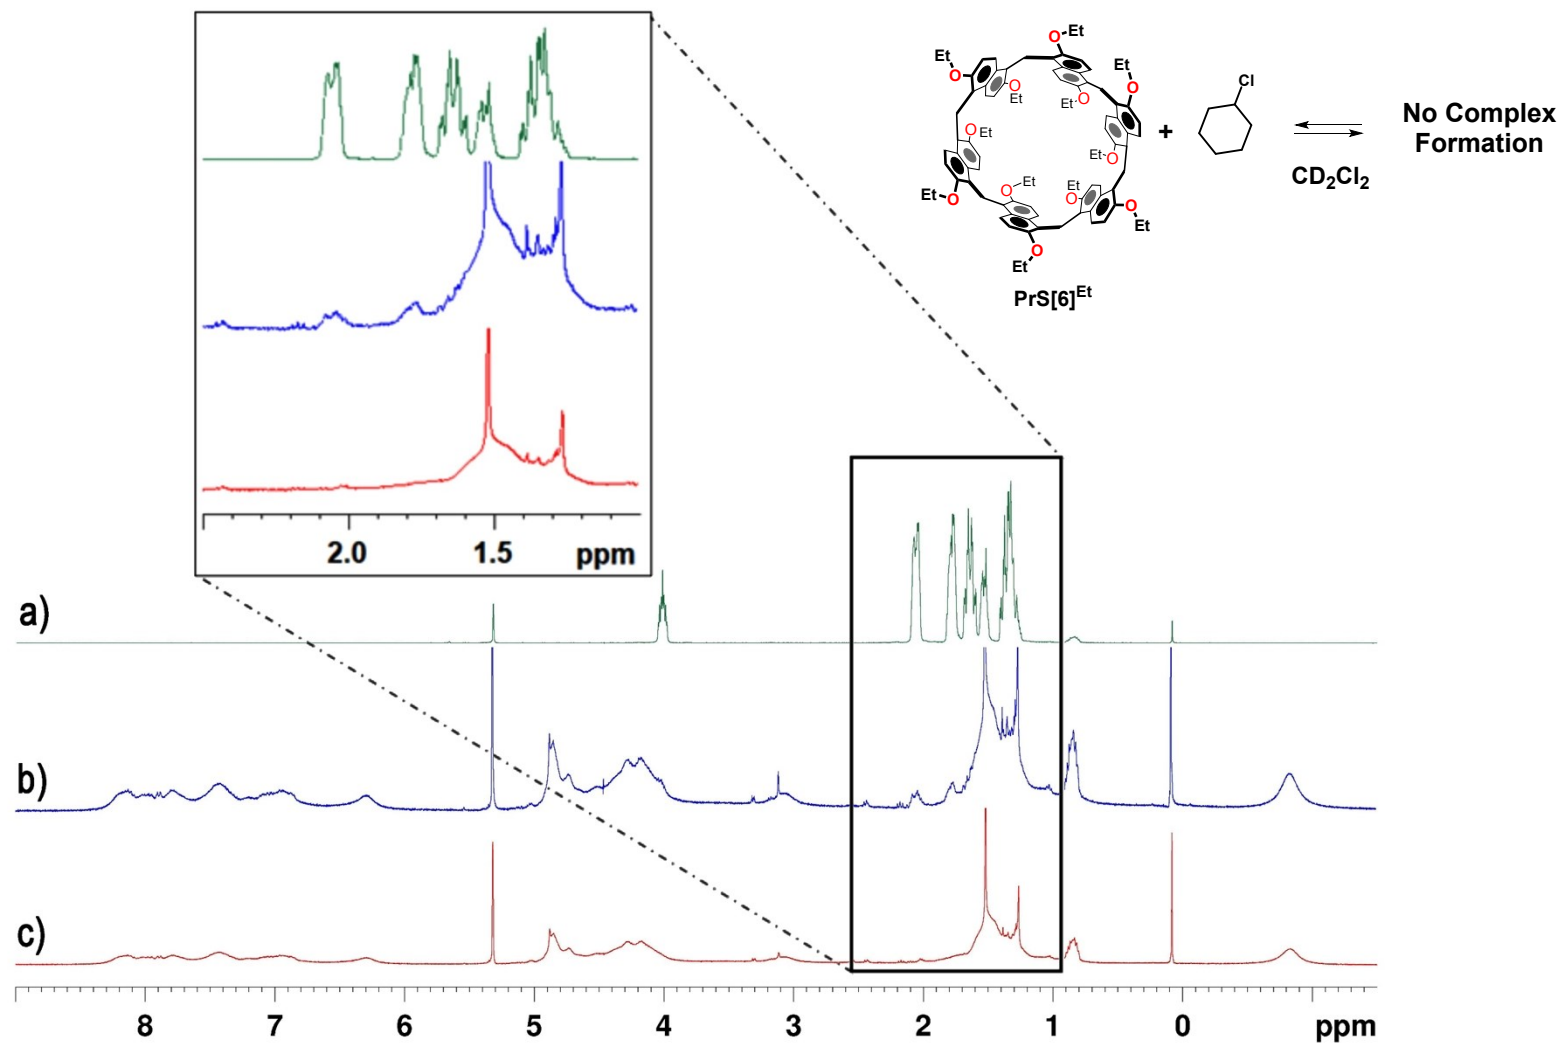

**Figure S30:** <sup>1</sup>H NMR spectra (400 MHz, CD<sub>2</sub>Cl<sub>2</sub>, 298 K) of: (a) chlorocyclohexane, (b) an equimolar solution of PrS[6]<sup>Et</sup> and chlorocyclohexane and (c) PrS[6]<sup>Et</sup>.

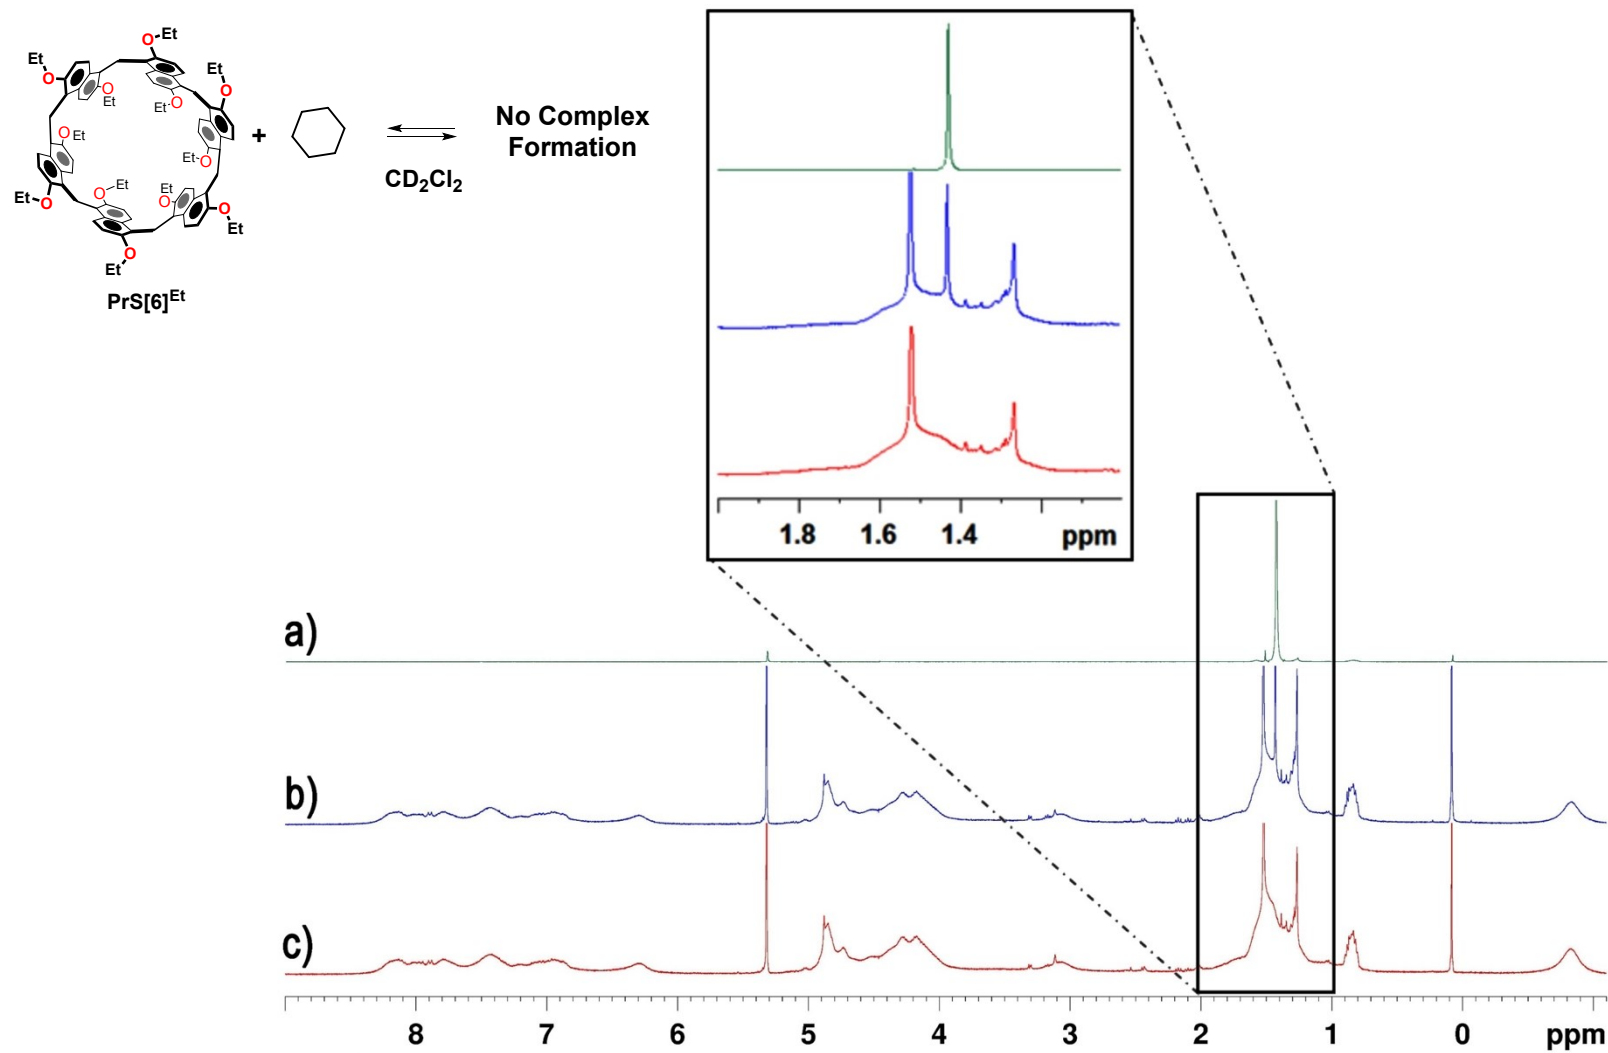

**Figure S31:**  $^1\text{H}$  NMR spectra (400 MHz,  $\text{CD}_2\text{Cl}_2$ , 298 K) of: (a) cyclohexane, (b) an equimolar solution of  $\text{PrS}[6]^{\text{Et}}$  and cyclohexane and (c)  $\text{PrS}[6]^{\text{Et}}$ .

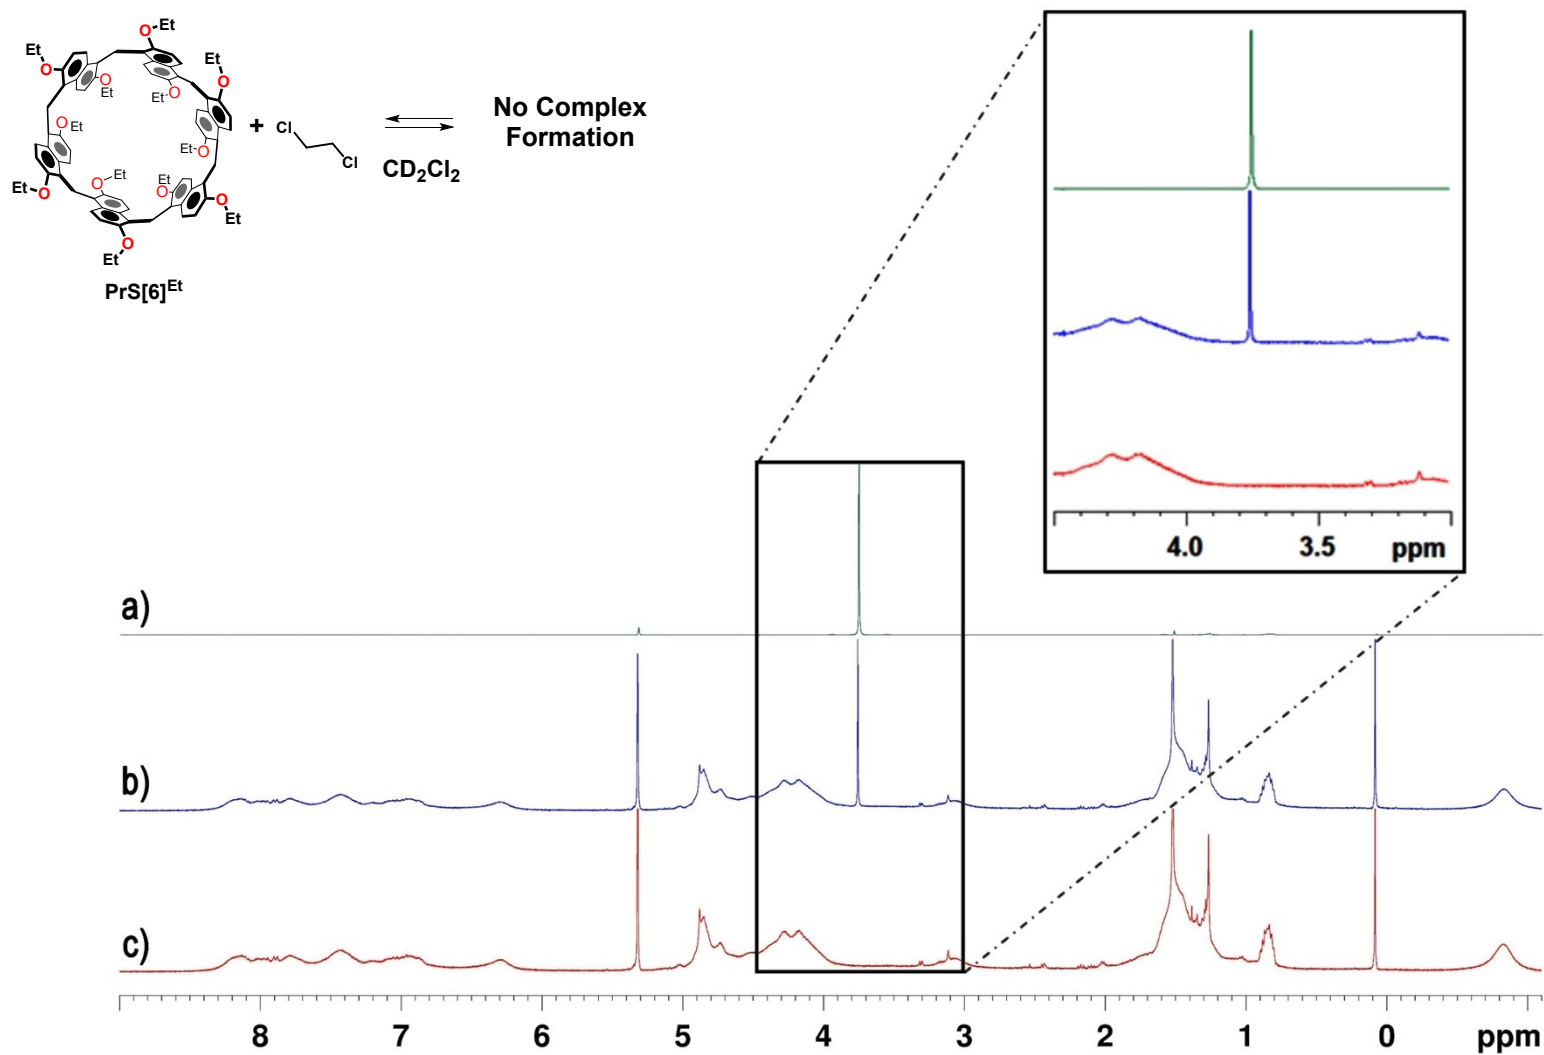

**Figure S32:**  $^1\text{H}$  NMR spectra (400 MHz,  $\text{CD}_2\text{Cl}_2$ , 298 K) of: (a) 1,2-dichloroethane, (b) an equimolar solution of  $\text{PrS}[6]^{\text{Et}}$  and 1,2-dichloroethane and (c)  $\text{PrS}[6]^{\text{Et}}$ .

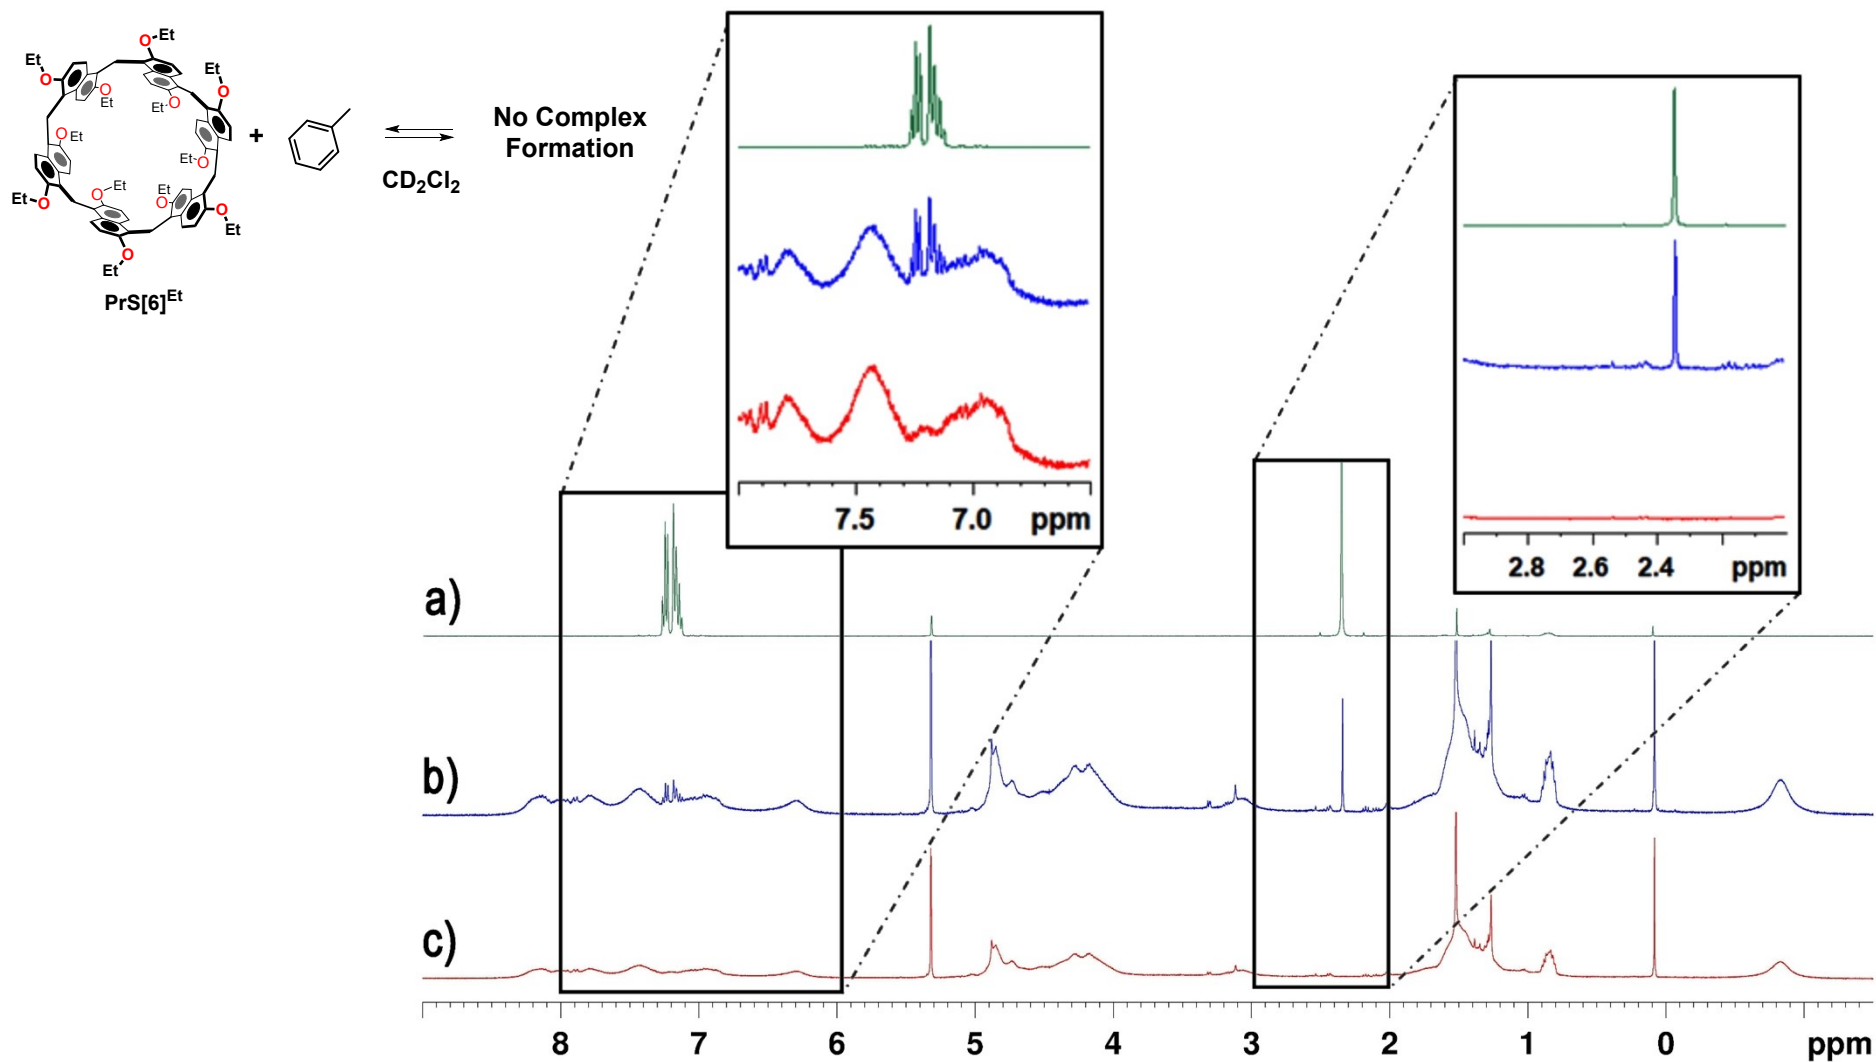

**Figure S33:**  $^1\text{H}$  NMR spectra (400 MHz,  $\text{CD}_2\text{Cl}_2$ , 298 K) of: (a) toluene, (b) an equimolar solution of  $\text{PrS}[6]^{\text{Et}}$  and Toluene and (c)  $\text{PrS}[6]^{\text{Et}}$ .

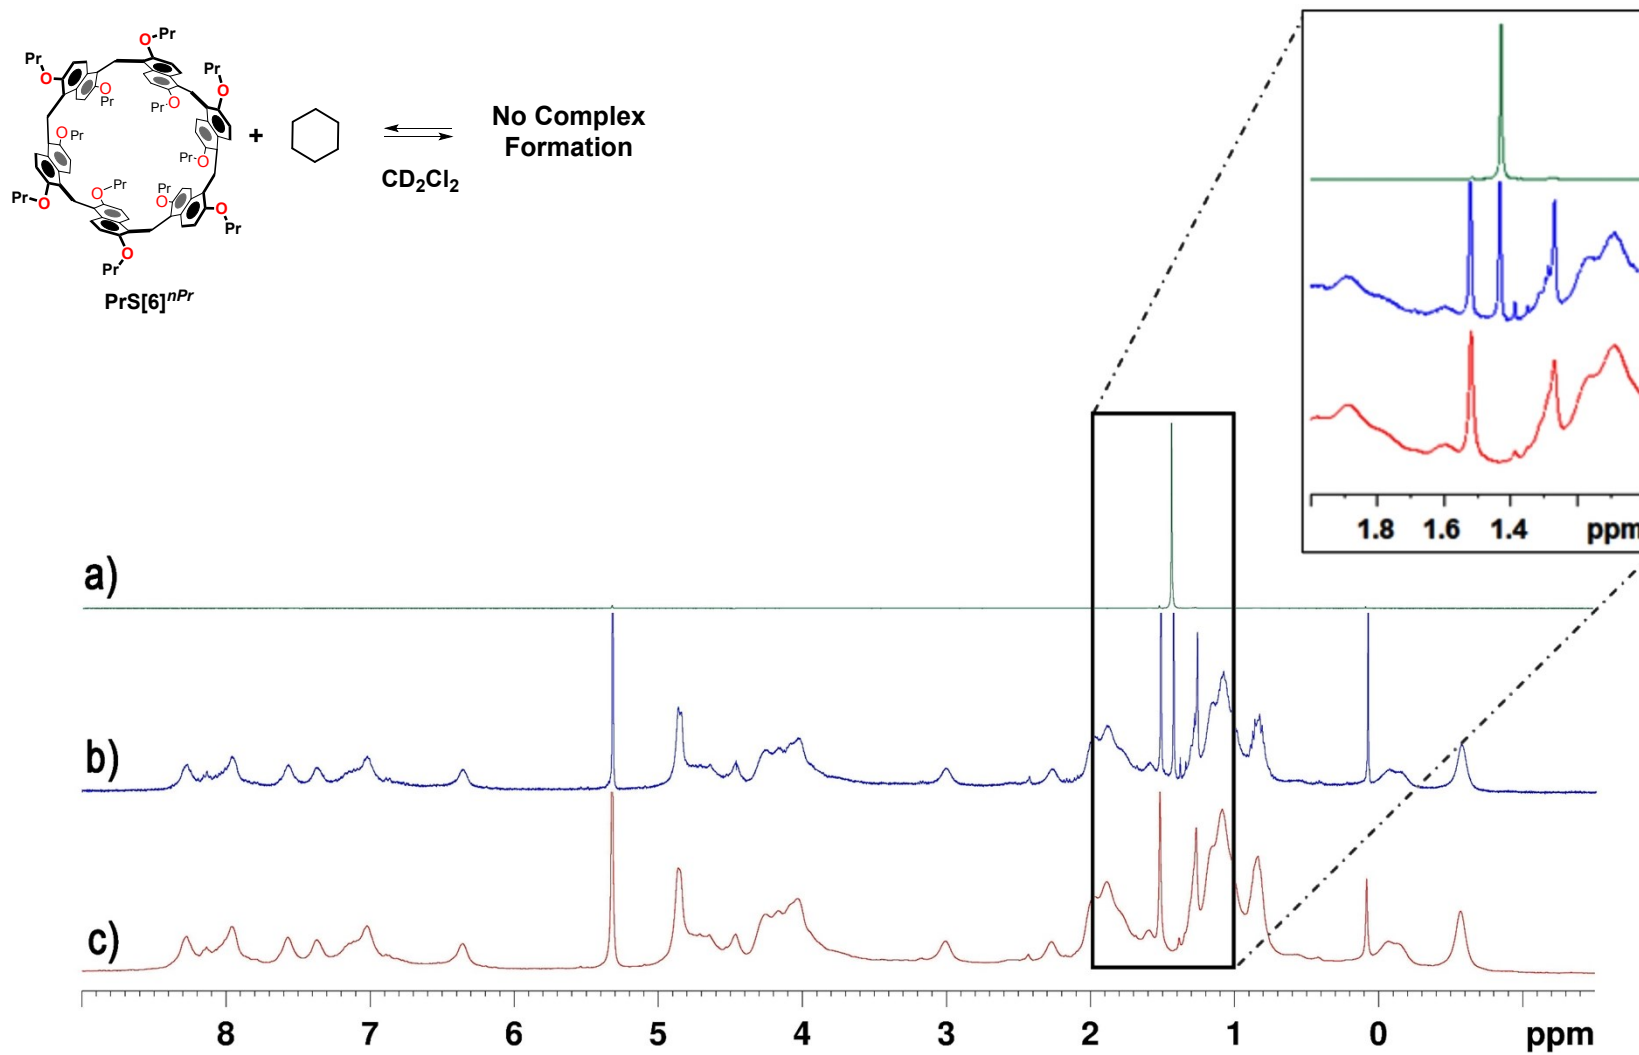

**Figure S34:**  $^1\text{H}$  NMR spectra (400 MHz,  $\text{CD}_2\text{Cl}_2$ , 298 K) of: (a) cyclohexane, (b) an equimolar solution of  $\text{PrS[6]}^{nPr}$  and cyclohexane and (c)  $\text{PrS[6]}^{nPr}$ .

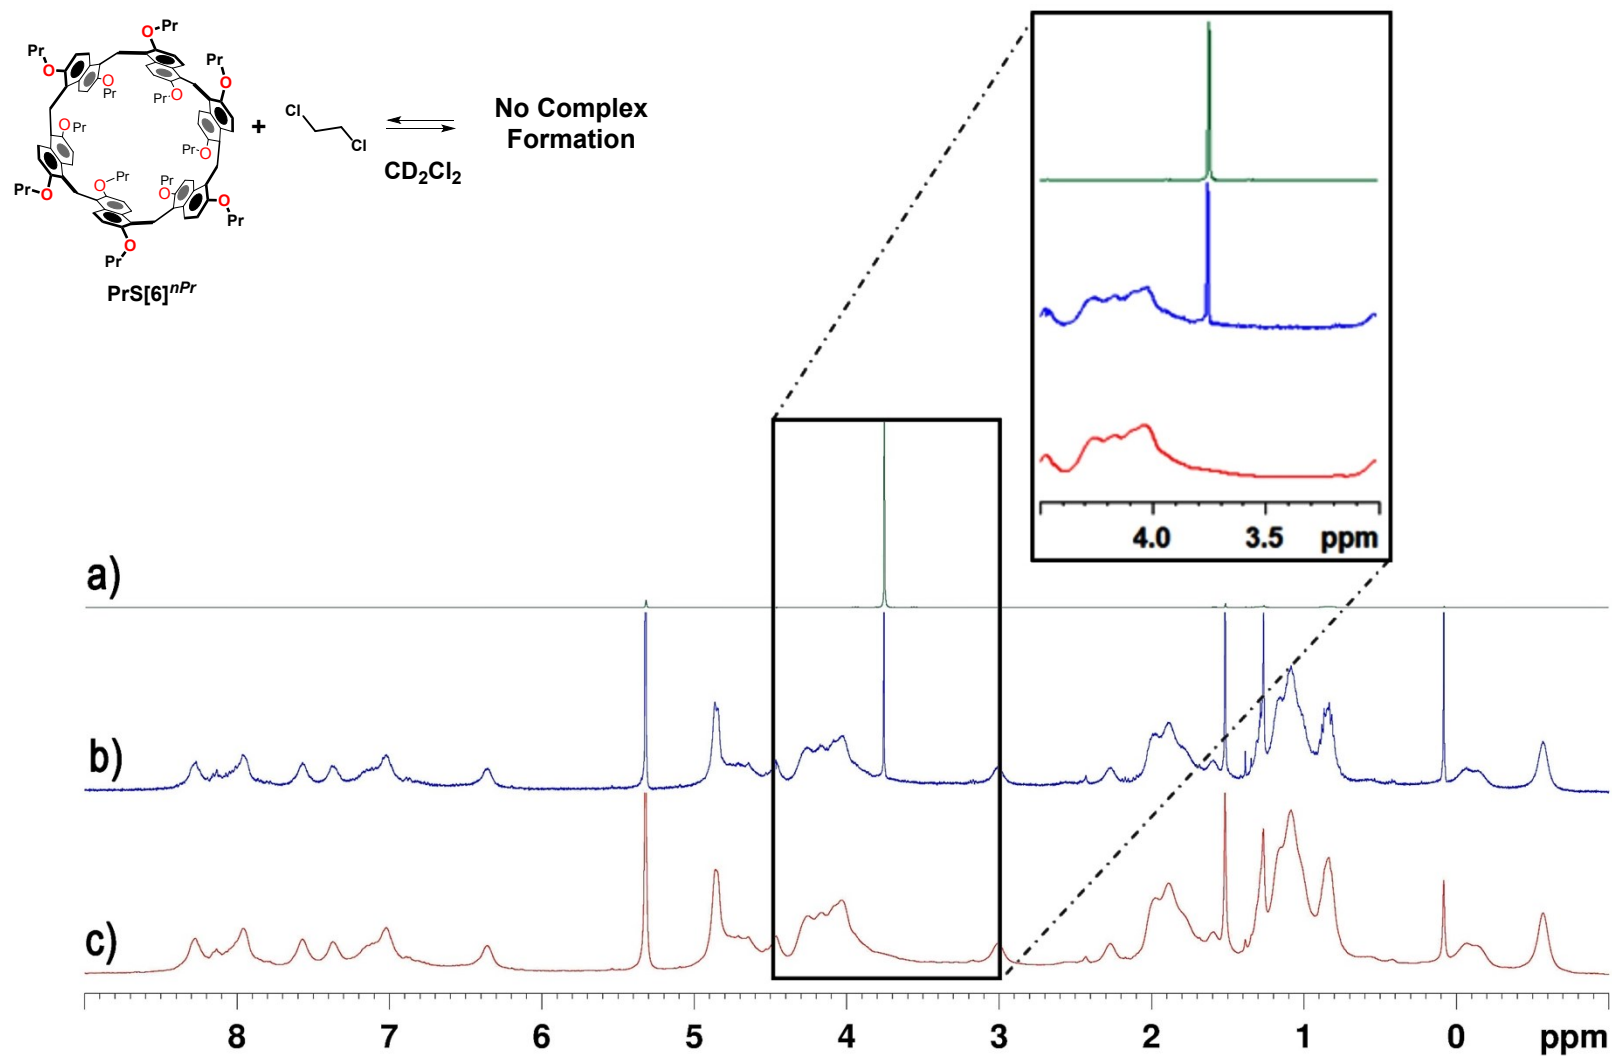

**Figure S35:**  $^1\text{H}$  NMR spectra (400 MHz,  $\text{CD}_2\text{Cl}_2$ , 298 K) of: (a) 1,2-dichloroethane, (b) an equimolar solution of  $\text{PrS}[6]^{nPr}$  and 1,2-dichloroethane and (c)  $\text{PrS}[6]^{nPr}$ .



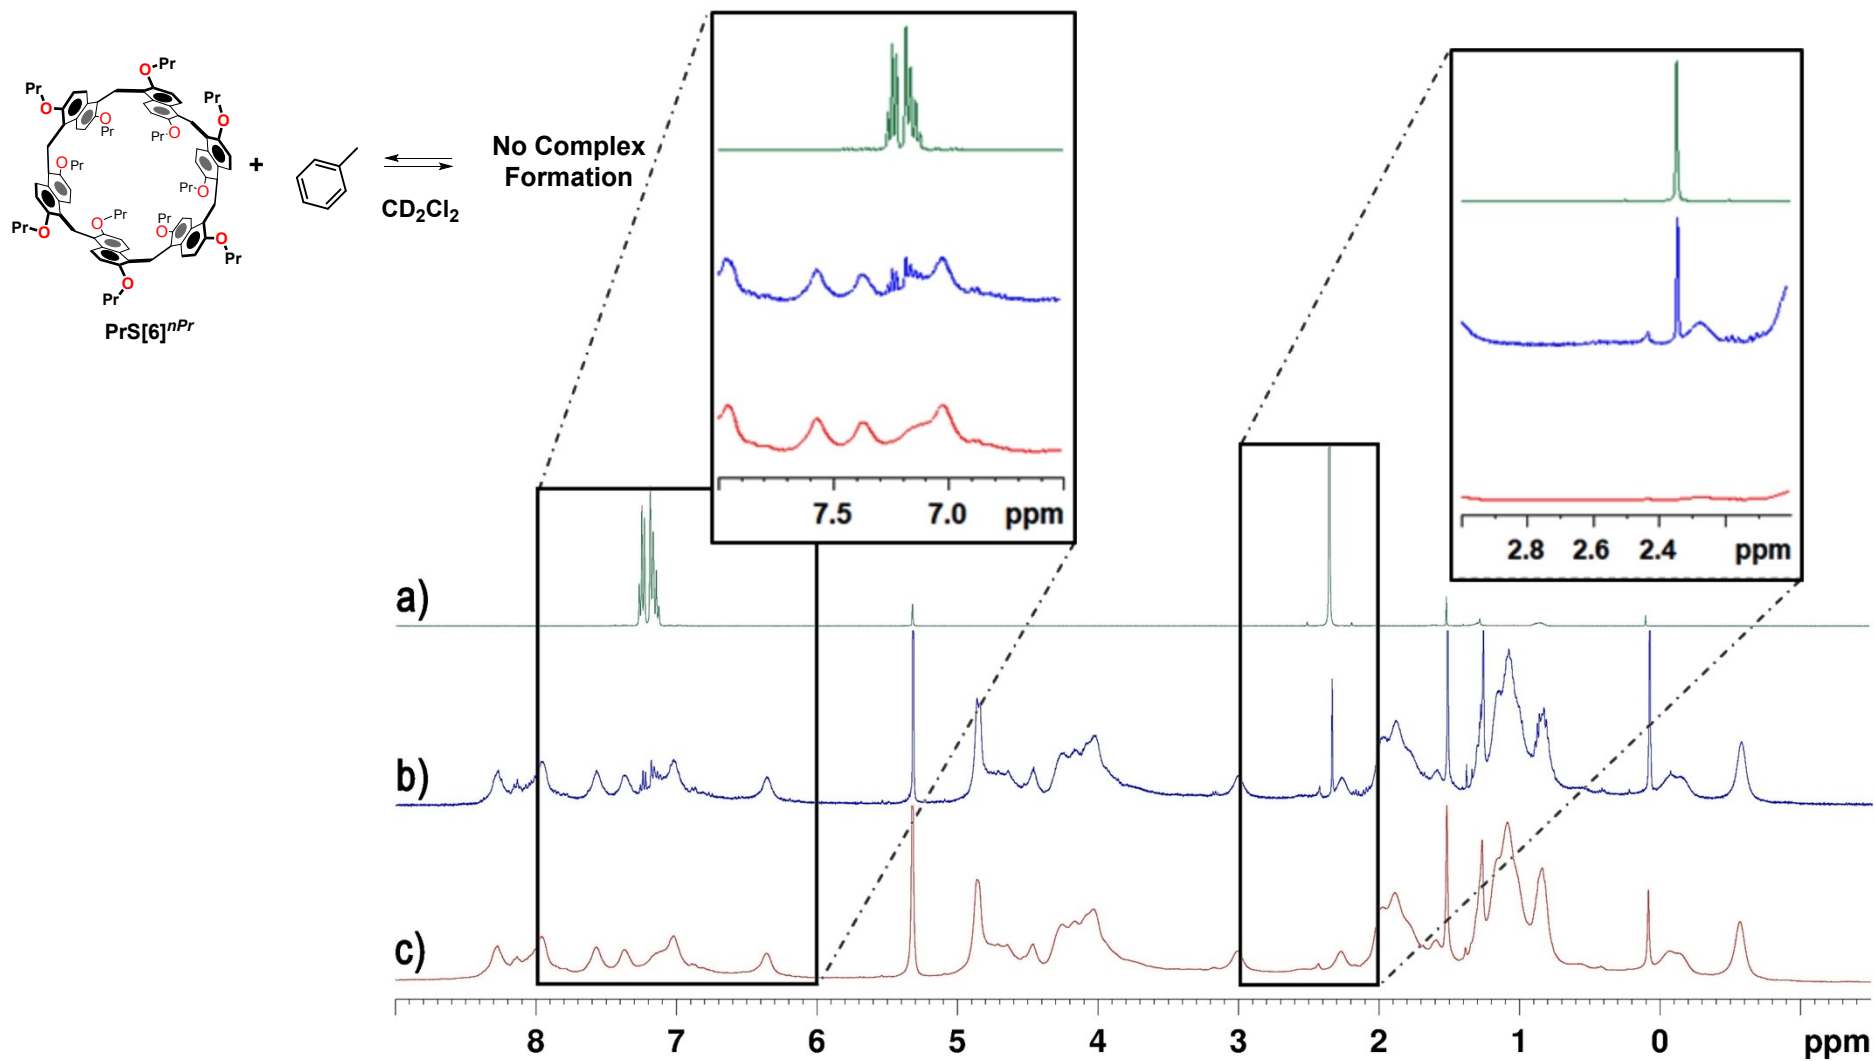

**Figure S36:**  $^1\text{H}$  NMR spectra (400 MHz,  $\text{CD}_2\text{Cl}_2$ , 298 K) of: (a) toluene, (b) an equimolar solution of  $\text{PrS}[6]^{nPr}$  and Toluene and (c)  $\text{PrS}[6]^{nPr}$

## Copies of 1D and 2D NMR spectra of prismarene complexes

### $5^{2+} @ \text{PrS}[5]^{Et}$

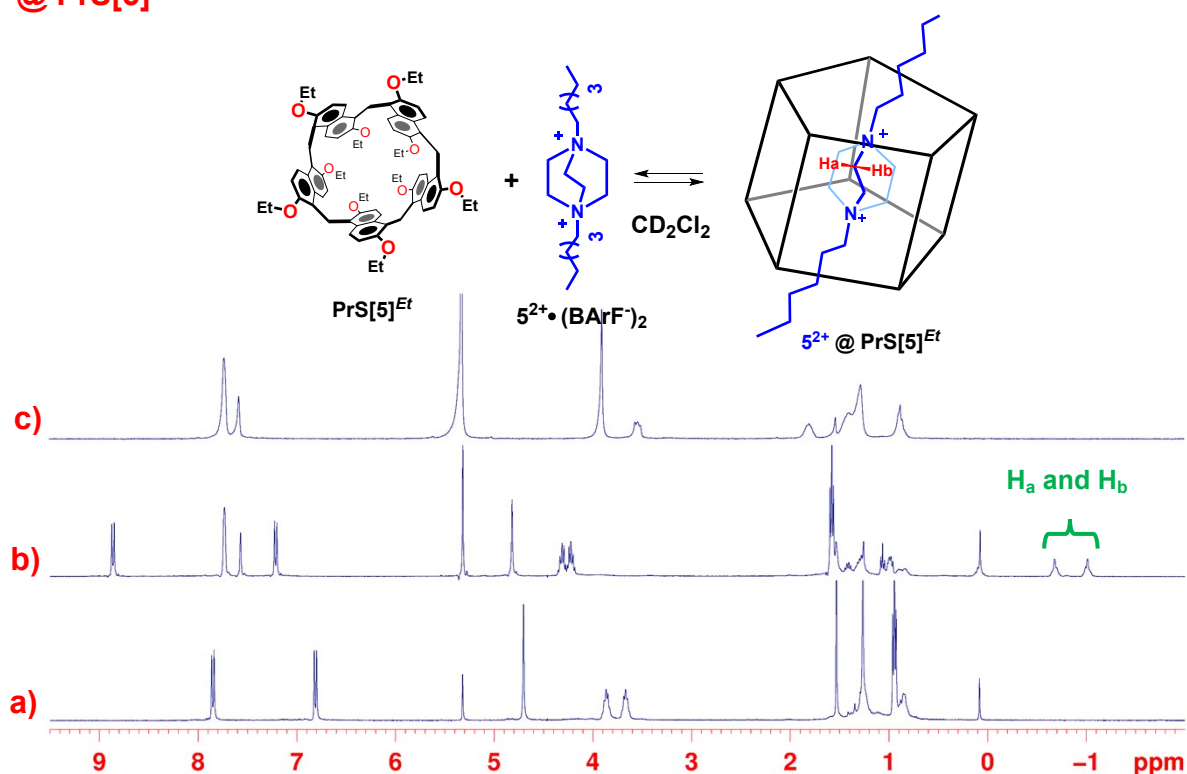

**Figure S37:**  $^1\text{H}$  NMR spectra (600 MHz,  $\text{CD}_2\text{Cl}_2$ , 298 K) of: (a)  $\text{PrS}[5]^{Et}$ , (b) an equimolar solution of  $\text{PrS}[5]^{Et}$  and  $5^{2+} \cdot (\text{BARF}^-)_2$  and (c)  $5^{2+} \cdot (\text{BARF}^-)_2$ .

### $6^+ @ \text{PrS}[5]^{Et}$

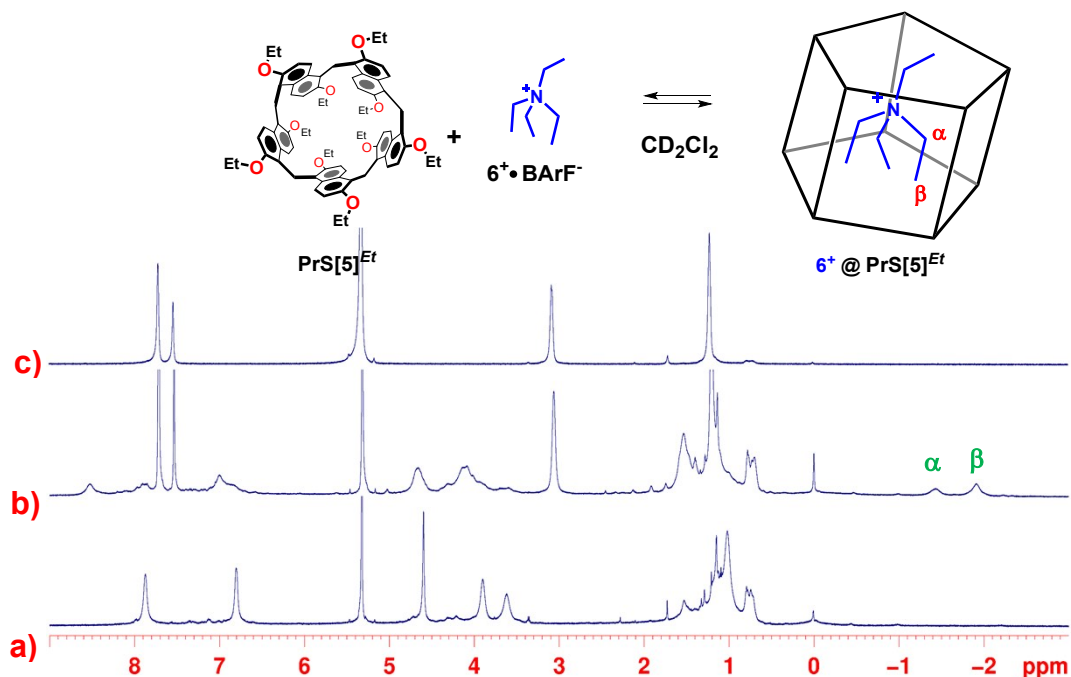

**Figure S38:**  $^1\text{H}$  NMR spectra (600 MHz,  $\text{CD}_2\text{Cl}_2$ , 183 K) of: (a)  $\text{PrS}[5]^{Et}$ , (b) an equimolar solution of  $\text{PrS}[5]^{Et}$  and  $6^+ \cdot (\text{BARF}^-)$  and (c)  $6^+ \cdot (\text{BARF}^-)$ .

### $7^{2+}@PrS[5]^{Et}$

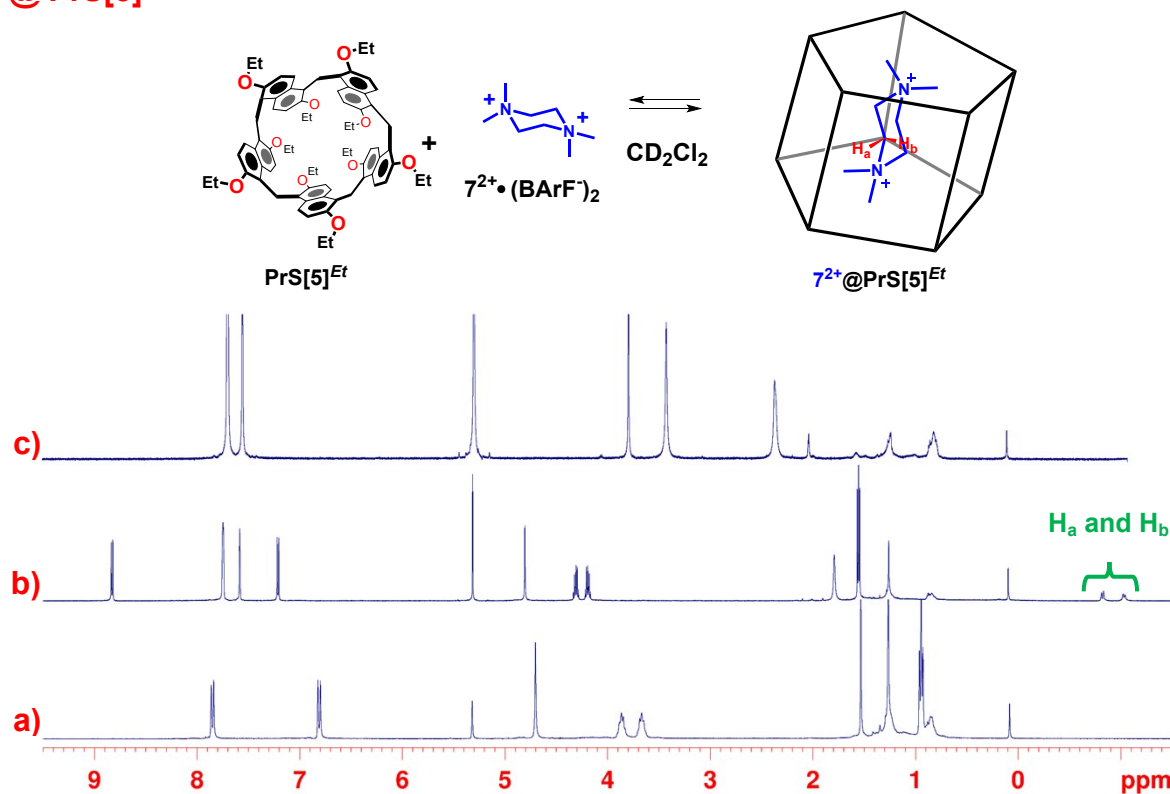

Figure S39:  $^1H$  NMR spectra (600 MHz,  $CD_2Cl_2$ , 298 K) of: (a)  $PrS[5]^{Et}$ , (b) an equimolar solution of  $PrS[5]^{Et}$  and  $7^{2+} \cdot (BARF^-)_2$  and (c)  $7^{2+} \cdot (BARF^-)_2$ .

### $8^{2+}@PrS[5]^{Et}$

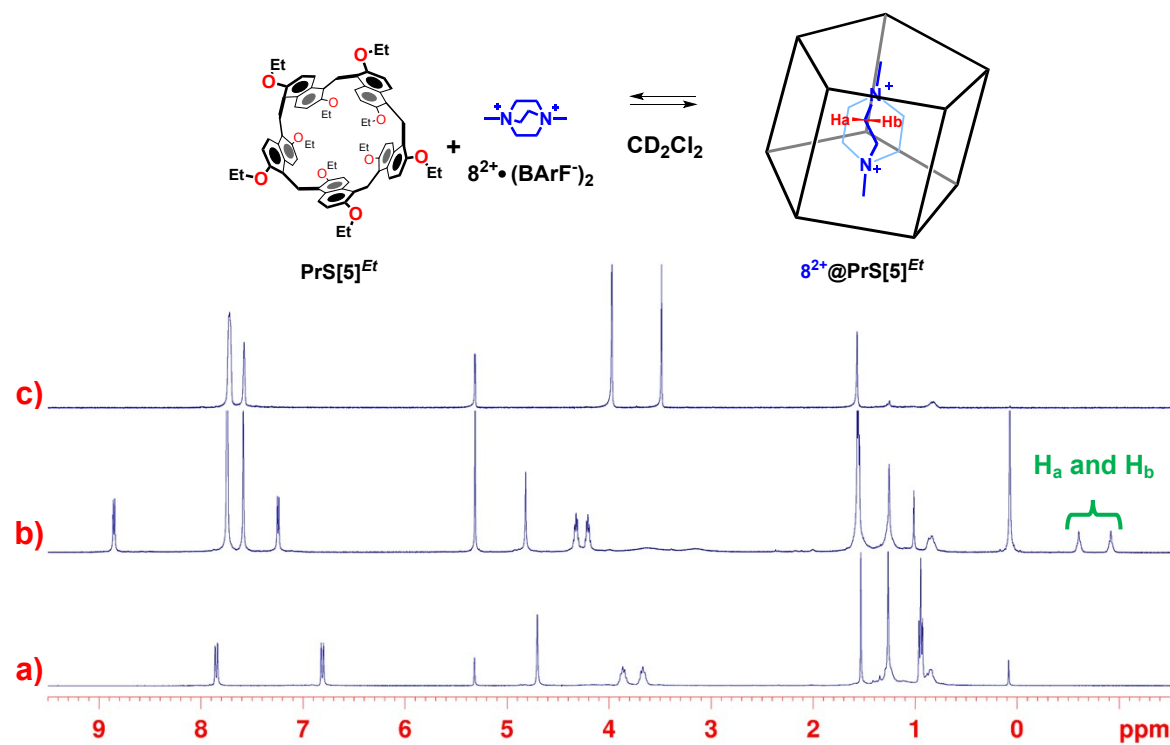

Figure S40:  $^1H$  NMR spectra (600 MHz,  $CD_2Cl_2$ , 298 K) of: (a)  $PrS[5]^{Et}$ , (b) an equimolar solution of  $PrS[5]^{Et}$  and  $8^{2+} \cdot (BARF^-)_2$  and (c)  $8^{2+} \cdot (BARF^-)_2$ .

### $9^{2+}@PrS[5]^{Et}$

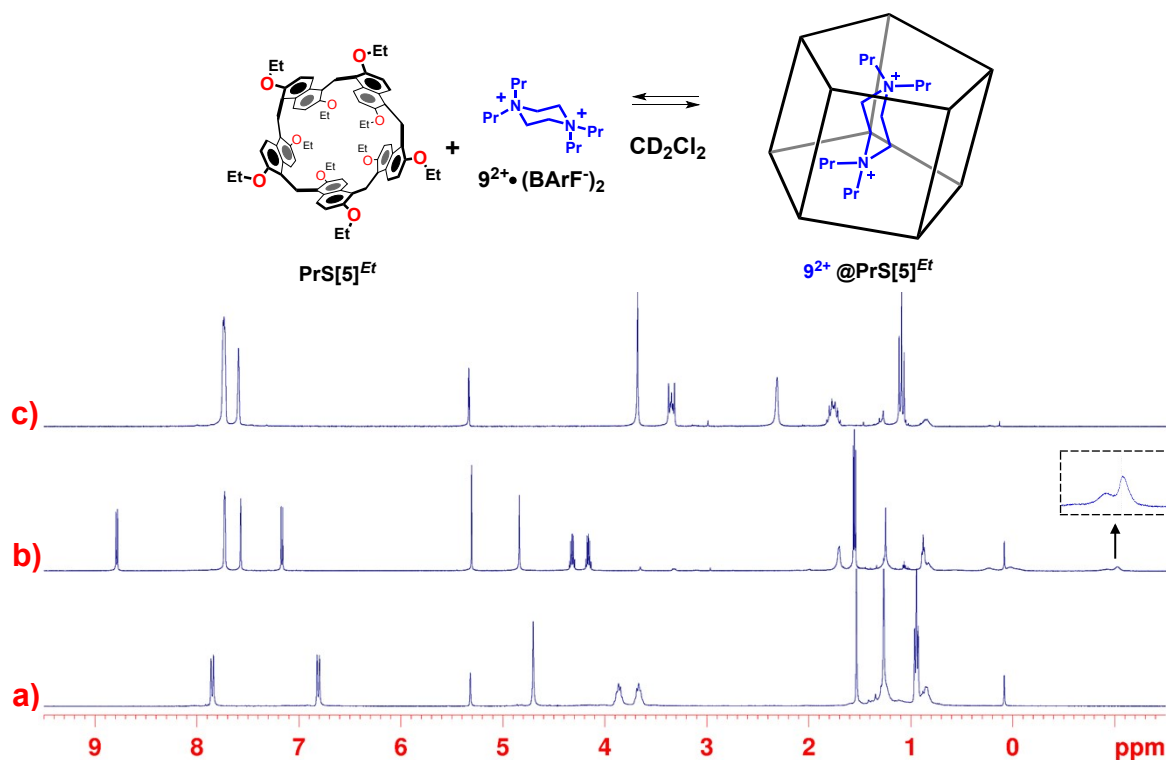

**Figure S41:**  $^1H$  NMR spectra (600 MHz,  $CD_2Cl_2$ , 298 K) of: (a)  $PrS[5]^{Et}$ , (b) an equimolar solution of  $PrS[5]^{Et}$  and  $9^{2+} \cdot (BARF^-)_2$  and (c)  $9^{2+} \cdot (BARF^-)_2$ .

### $5^{2+}@PrS[6]^{Et}$

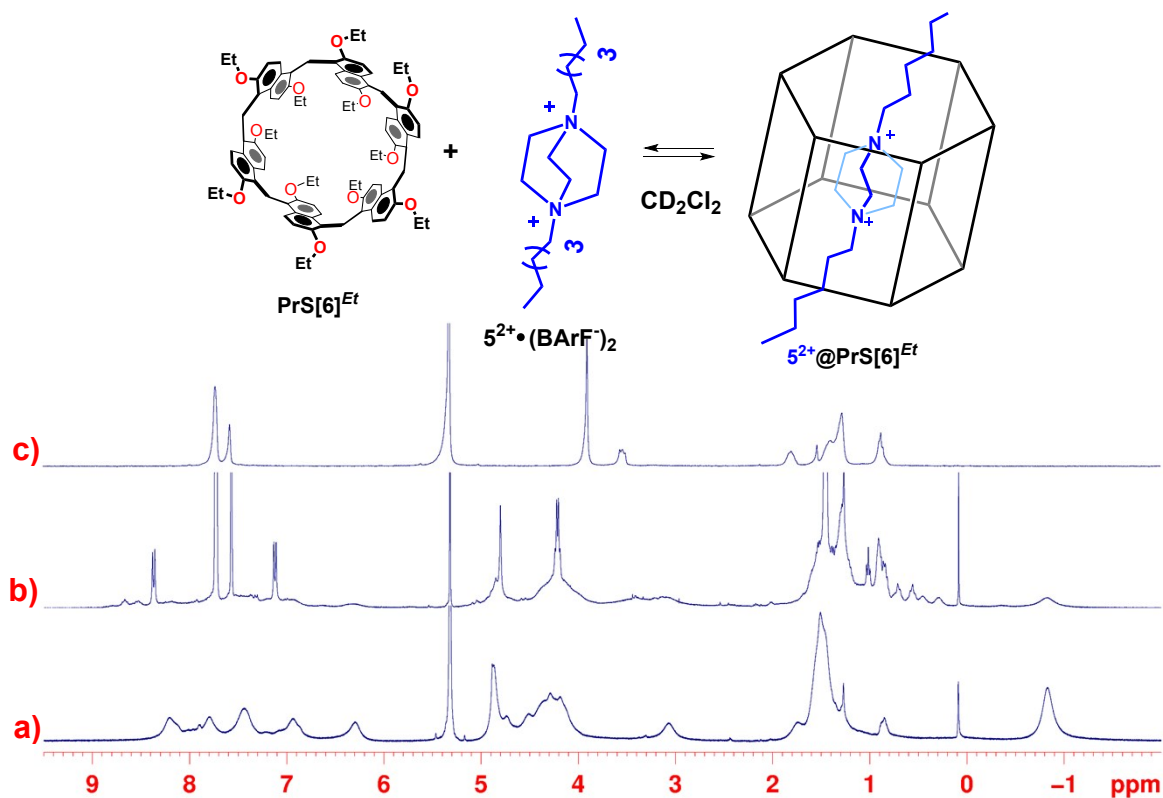

**Figure S42:**  $^1H$  NMR spectra (600 MHz,  $CD_2Cl_2$ , 298 K) of: (a)  $PrS[6]^{Et}$ , (b) an equimolar solution of  $PrS[6]^{Et}$  and  $5^{2+} \cdot (BARF^-)_2$  and (c)  $5^{2+} \cdot (BARF^-)_2$ .

### 6<sup>+</sup>@PrS[6]<sup>Et</sup>

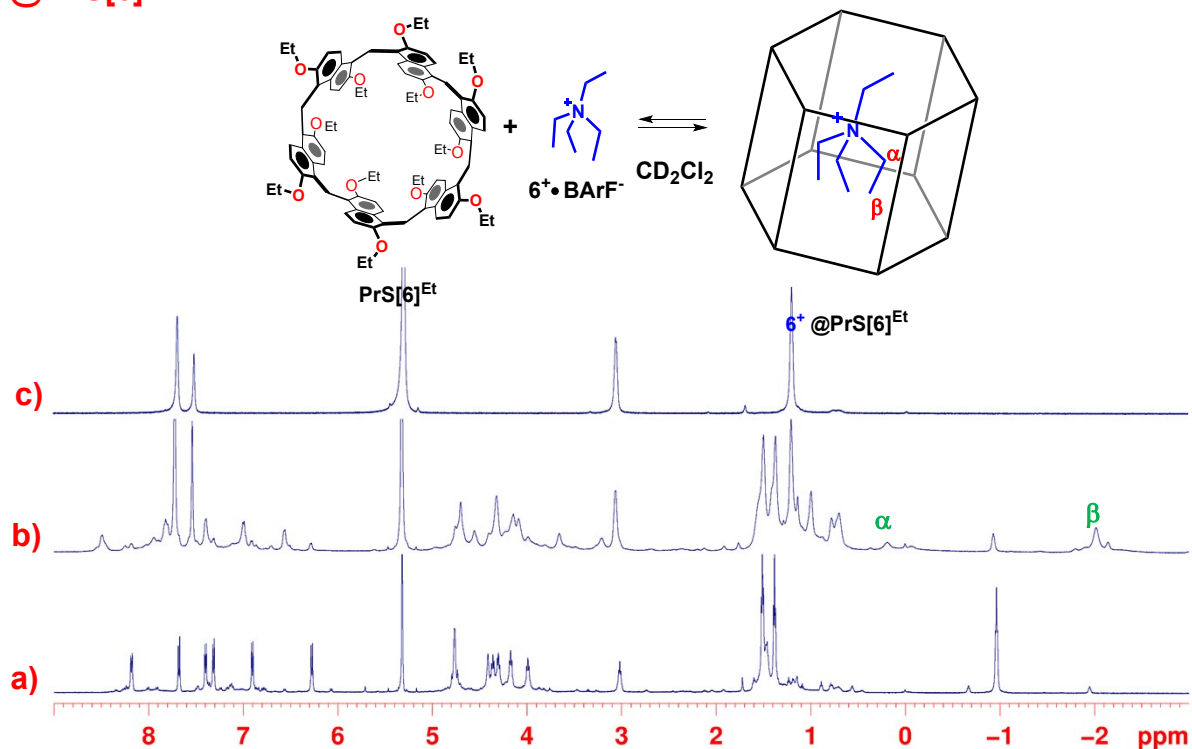

Figure S43: <sup>1</sup>H NMR spectra (600 MHz, CD<sub>2</sub>Cl<sub>2</sub>, 183 K) of: (a) PrS[6]<sup>Et</sup>, (b) an equimolar solution of PrS[6]<sup>Et</sup> and 6<sup>+</sup>·(BARF<sup>-</sup>) and (c) 6<sup>+</sup>·(BARF<sup>-</sup>).

### 7<sup>2+</sup>@PrS[6]<sup>Et</sup>

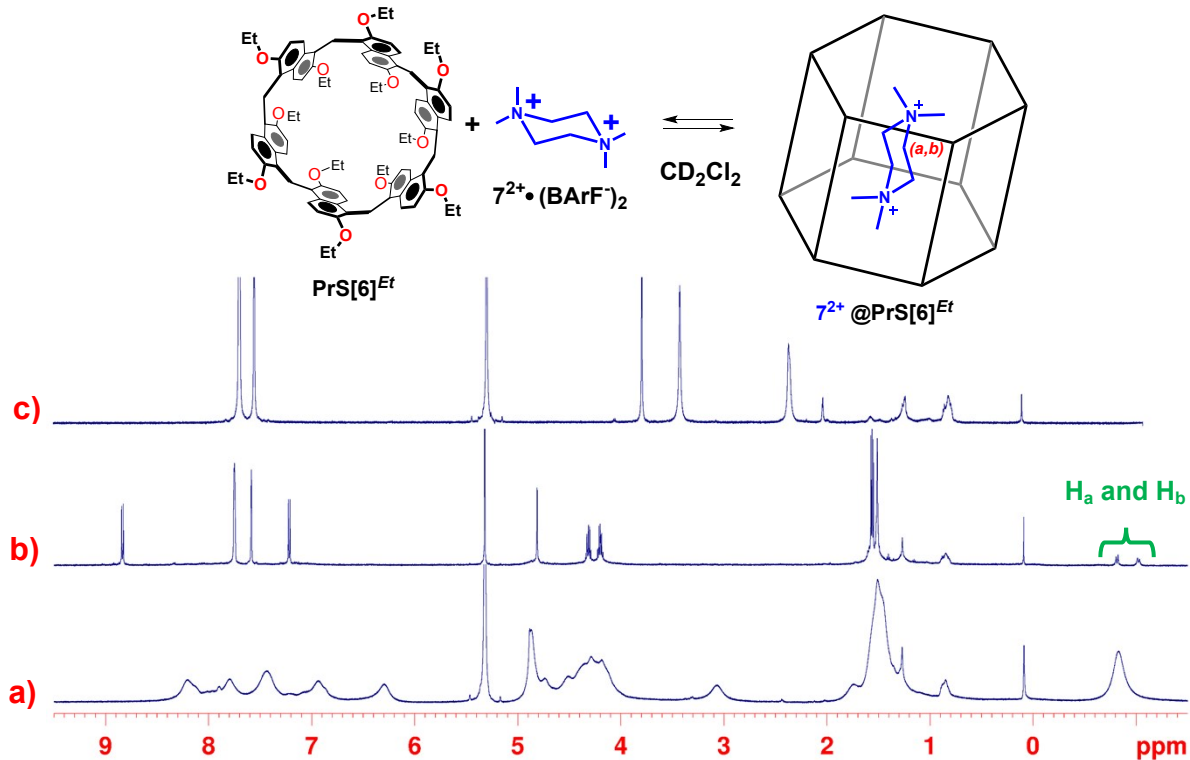

Figure S44: <sup>1</sup>H NMR spectra (600 MHz, CD<sub>2</sub>Cl<sub>2</sub>, 298 K) of: (a) PrS[6]<sup>Et</sup>, (b) an equimolar solution of PrS[6]<sup>Et</sup> and 7<sup>2+</sup>·(BARF<sup>-</sup>)<sub>2</sub> and (c) 7<sup>2+</sup>·(BARF<sup>-</sup>)<sub>2</sub>.

### $5^{2+}@PrS[5]^{nPr}$

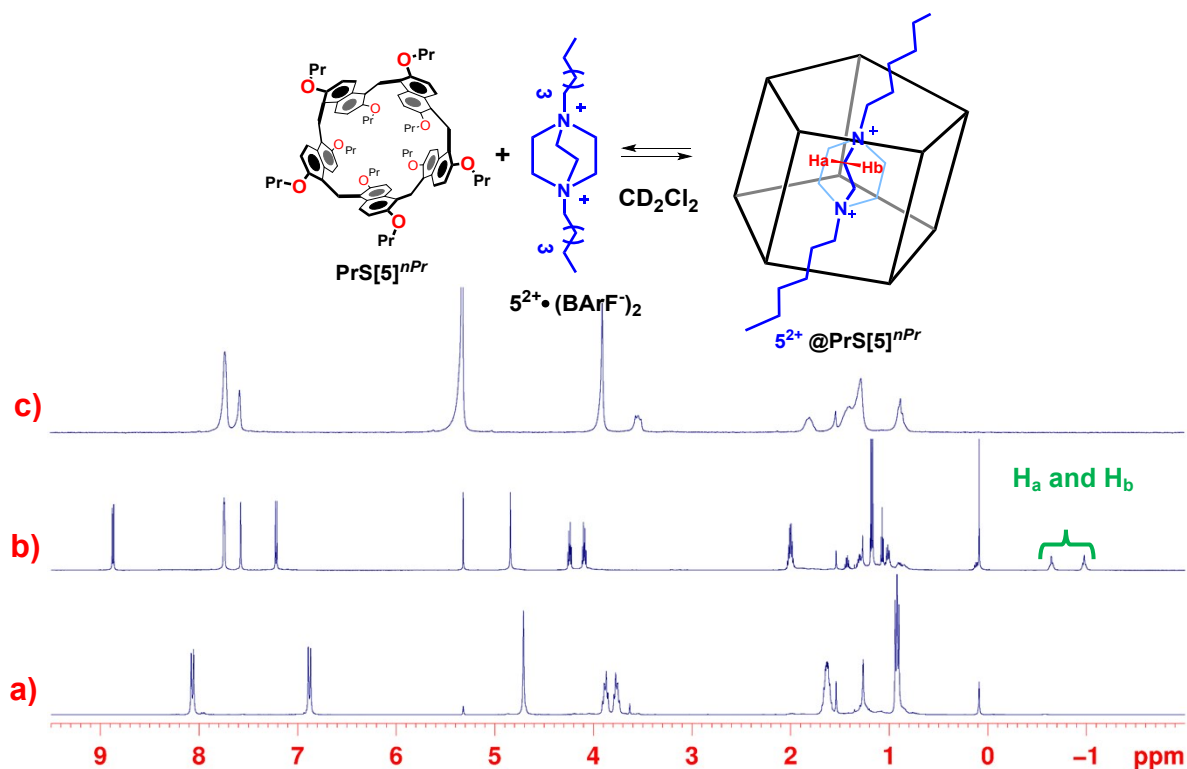

**Figure S45:**  $^1H$  NMR spectra (600 MHz,  $CD_2Cl_2$ , 298 K) of: (a)  $PrS[5]^{nPr}$ , (b) an equimolar solution of  $PrS[5]^{nPr}$  and  $5^{2+} \cdot (BARF^-)_2$  and (c)  $5^{2+} \cdot (BARF^-)_2$ .

### $7^{2+}@PrS[5]^{nPr}$

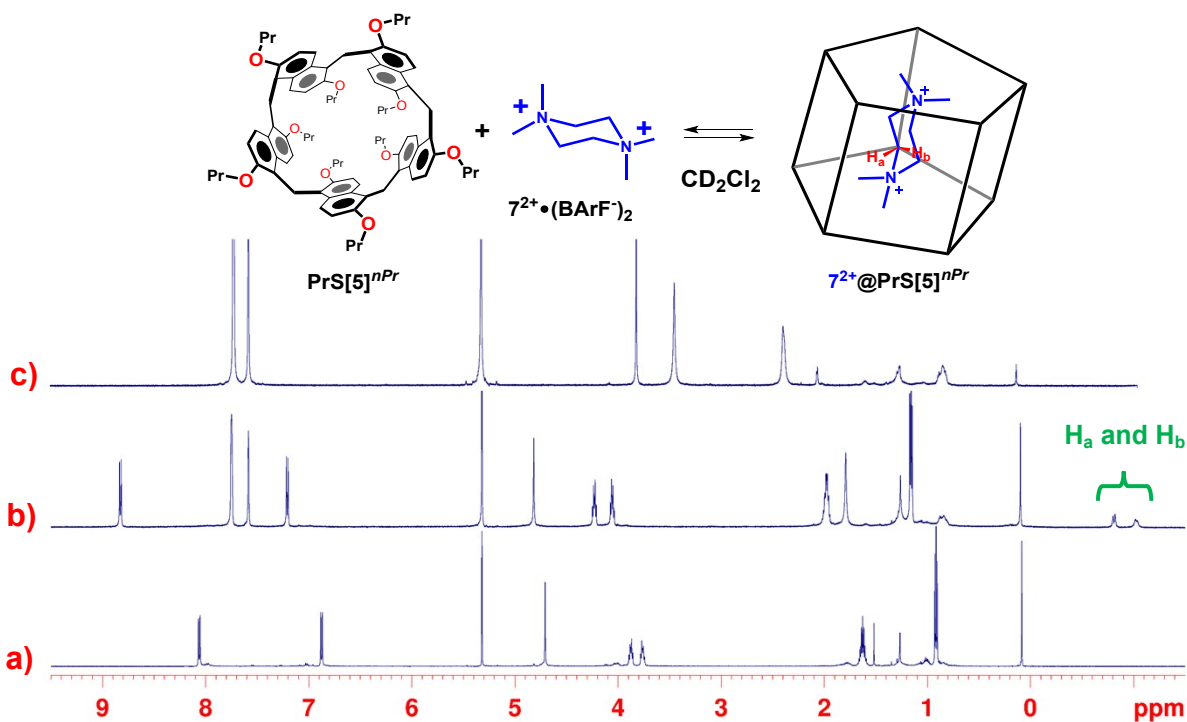

**Figure S46:**  $^1H$  NMR spectra (600 MHz,  $CD_2Cl_2$ , 298 K) of: (a)  $PrS[5]^{nPr}$ , (b) an equimolar solution of  $PrS[5]^{nPr}$  and  $7^{2+} \cdot (BARF^-)_2$  and (c)  $7^{2+} \cdot (BARF^-)_2$ .

### $8^{2+} @ \text{PrS}[5]^{nPr}$

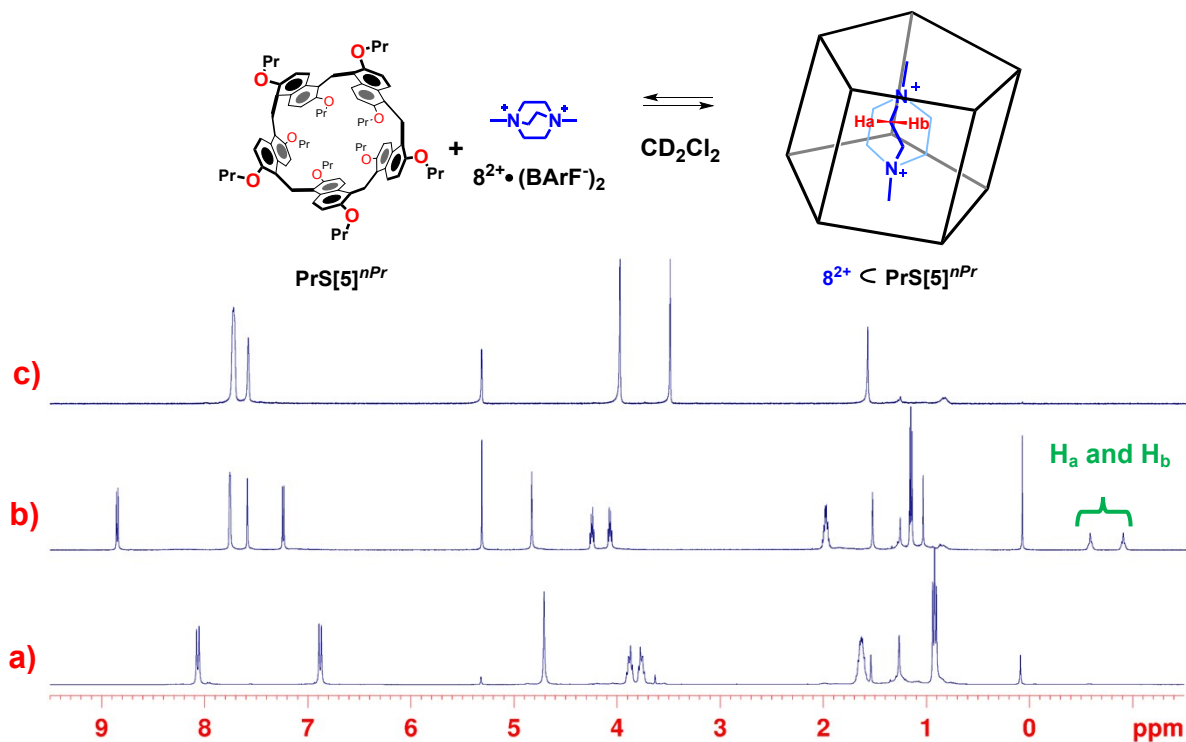

Figure S47:  $^1\text{H}$  NMR spectra (600 MHz,  $\text{CD}_2\text{Cl}_2$ , 298 K) of: (a)  $\text{PrS}[5]^{nPr}$ , (b) an equimolar solution of  $\text{PrS}[5]^{nPr}$  and  $8^{2+} \cdot (\text{BArF}^-)_2$  and (c)  $8^{2+} \cdot (\text{BArF}^-)_2$ .

### $9^{2+} @ \text{PrS}[5]^{nPr}$

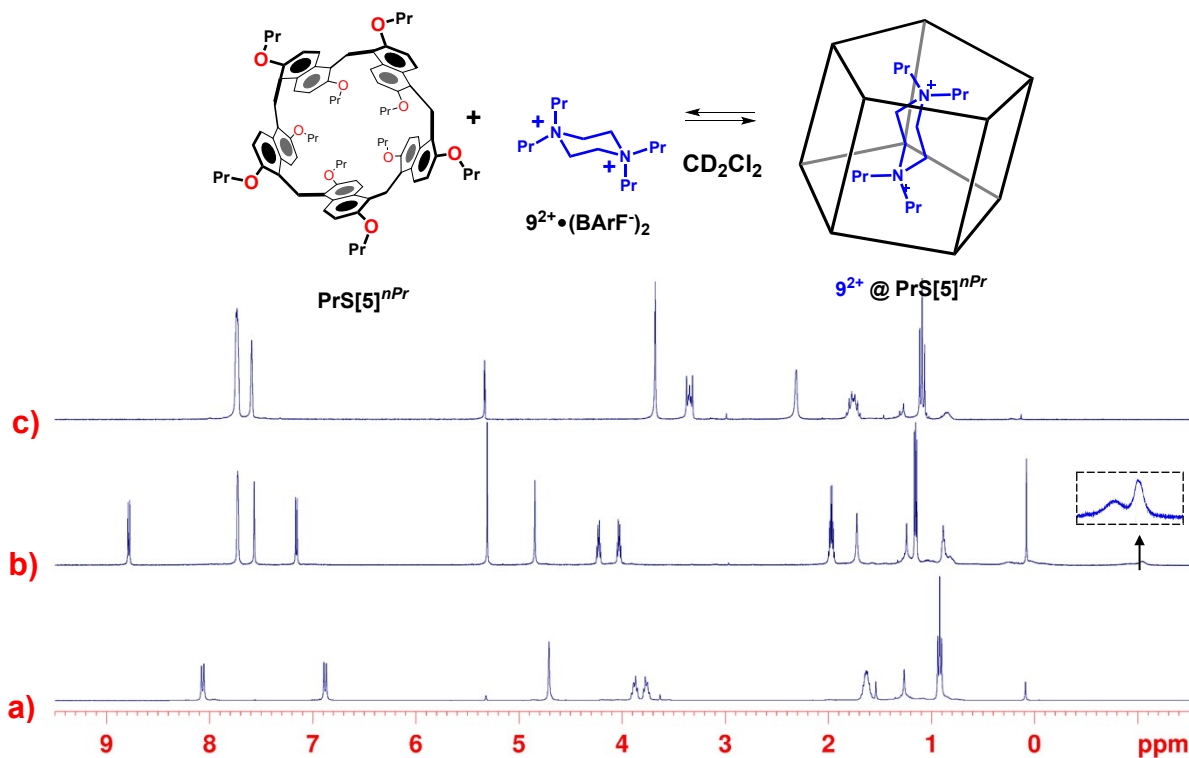

Figure 48.  $^1\text{H}$  NMR spectra (600 MHz,  $\text{CD}_2\text{Cl}_2$ , 298 K) of: (a)  $\text{PrS}[5]^{nPr}$ , (b) an equimolar solution of  $\text{PrS}[5]^{nPr}$  and  $9^{2+} \cdot (\text{BArF}^-)_2$  and (c)  $9^{2+} \cdot (\text{BArF}^-)_2$ .

### 6<sup>+</sup>@PrS[6]<sup>nPr</sup>

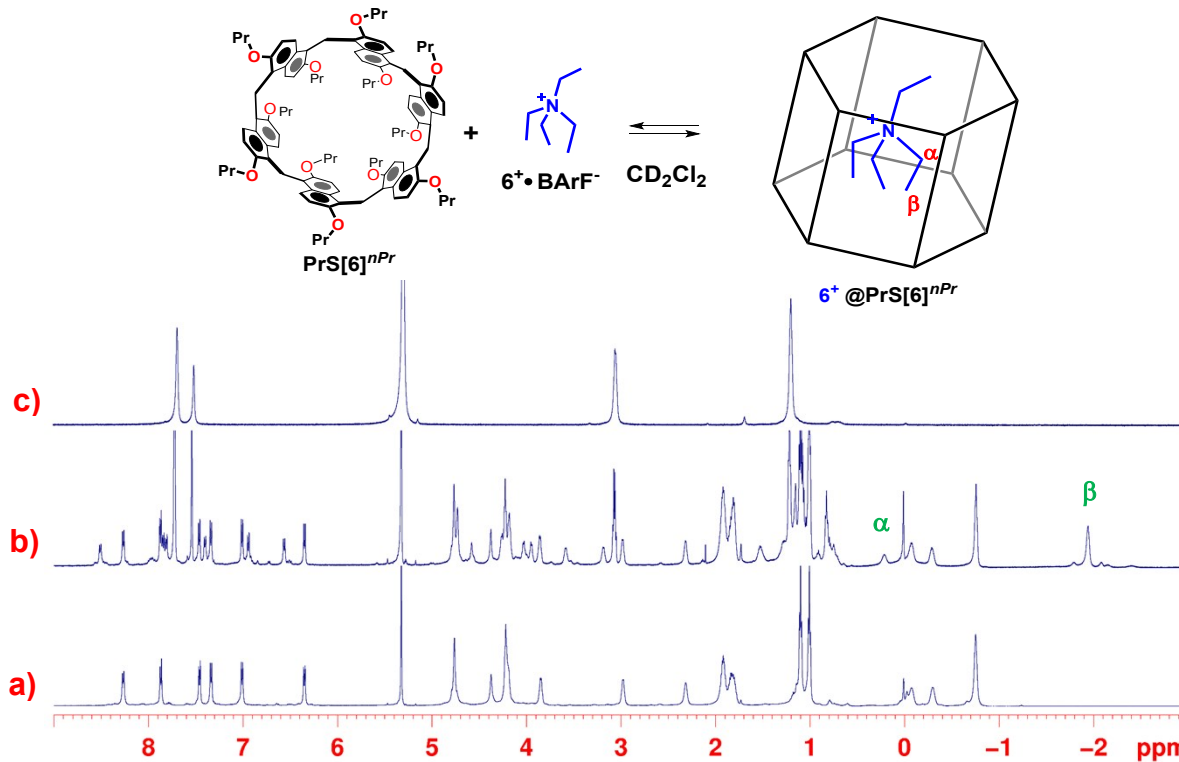

**Figure S49:**  $^1\text{H}$  NMR spectra (600 MHz,  $\text{CD}_2\text{Cl}_2$ , 183 K) of: (a)  $\text{PrS}[6]^{nPr}$ , (b) an equimolar solution of  $\text{PrS}[6]^{nPr}$  and  $6^+ \cdot (\text{BARF}^-)$  and (c)  $6^+ \cdot (\text{BARF}^-)$ .

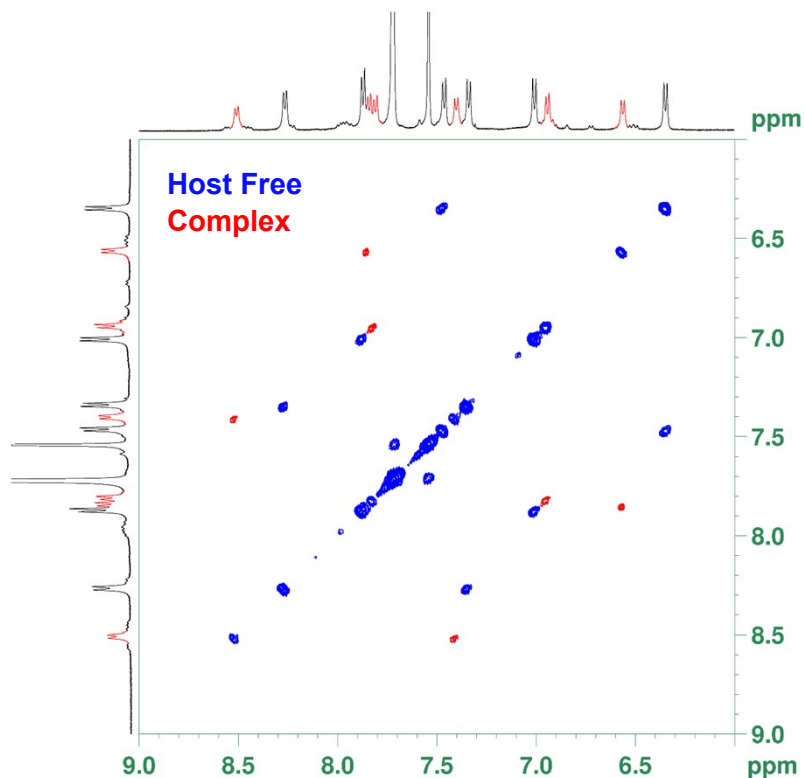

**Figure S50:** Significant portion of 2D-DQF COSY spectrum of  $6^+ @ \text{PrS}[6]^{nPr}$  ( $\text{CD}_2\text{Cl}_2$ , 600 MHz, 183 K).



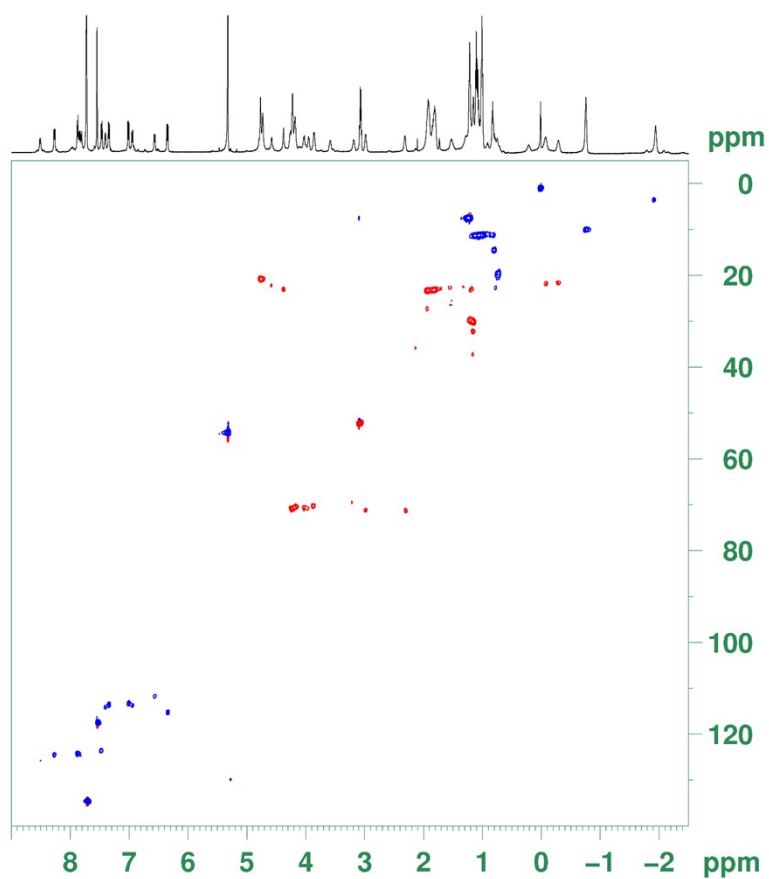

**Figure S51:** 2D-HSQC spectrum of  $6^+@ \text{PrS}[6]^{nPr}$  ( $\text{CD}_2\text{Cl}_2$ , 600 MHz, 183 K).

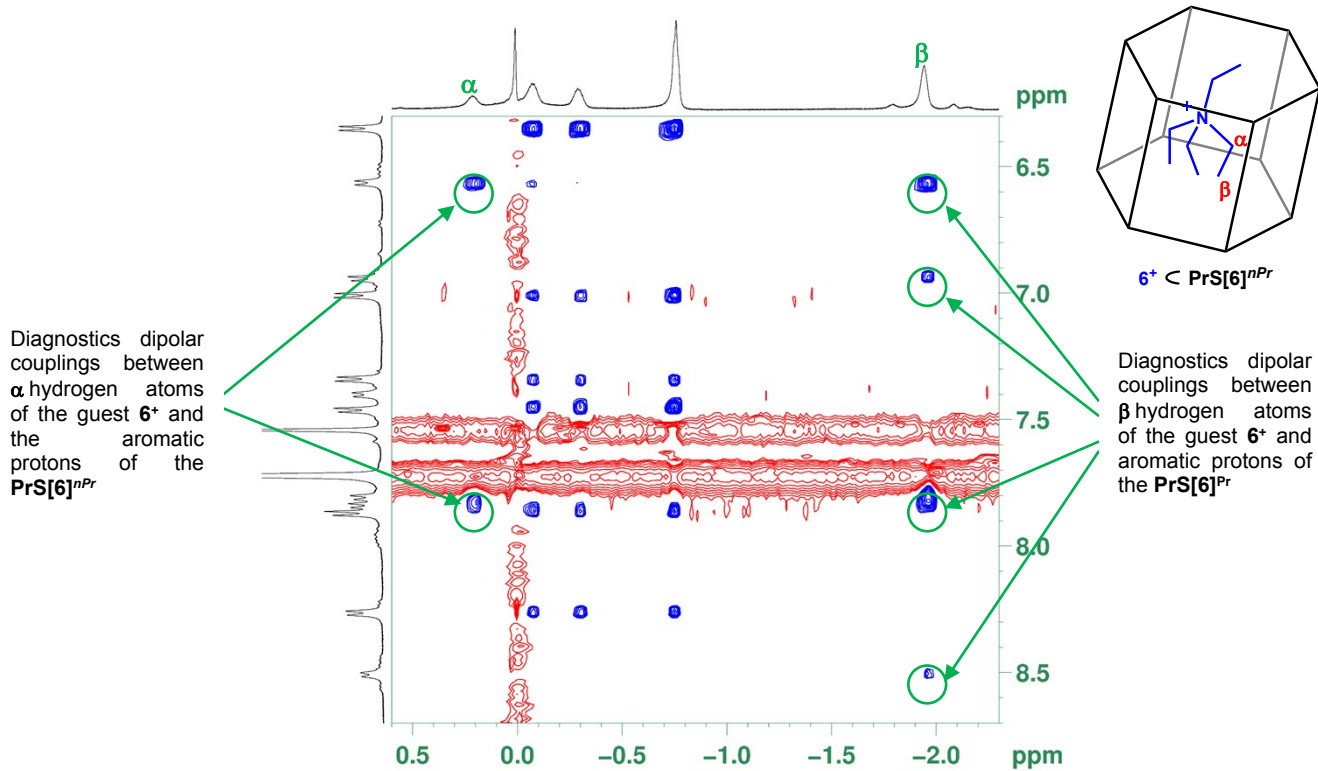

**Figure S52:** Significant portion of 2D-NOESY spectrum of  $6^+@ \text{PrS}[6]^{nPr}$  ( $\text{CD}_2\text{Cl}_2$ , 600 MHz, 183 K).

$7^{2+}@PrS[6]^{nPr}$

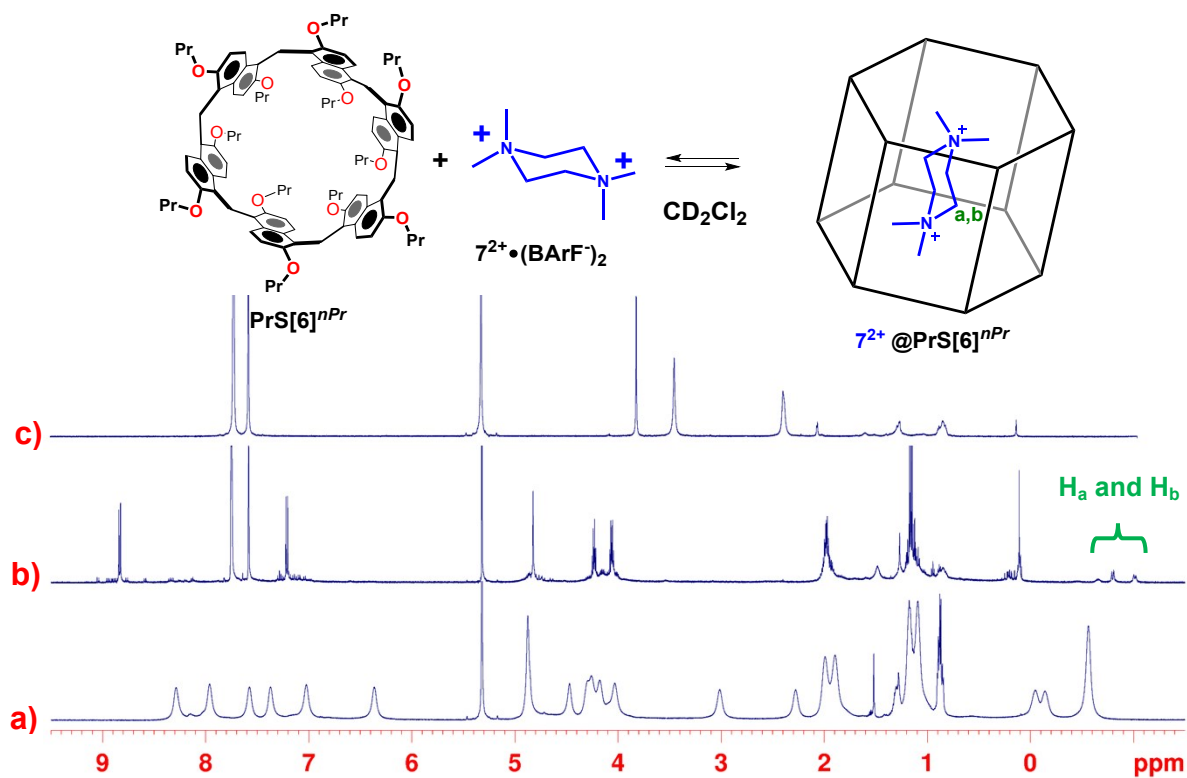

**Figure S53:**  $^1H$  NMR spectra (600 MHz,  $CD_2Cl_2$ , 298 K) of: (a)  $PrS[6]^{nPr}$ , (b) an equimolar solution of  $PrS[6]^{nPr}$  and  $7^{2+} \cdot (BARF^-)_2$  and (c)  $7^{2+} \cdot (BARF^-)_2$ .

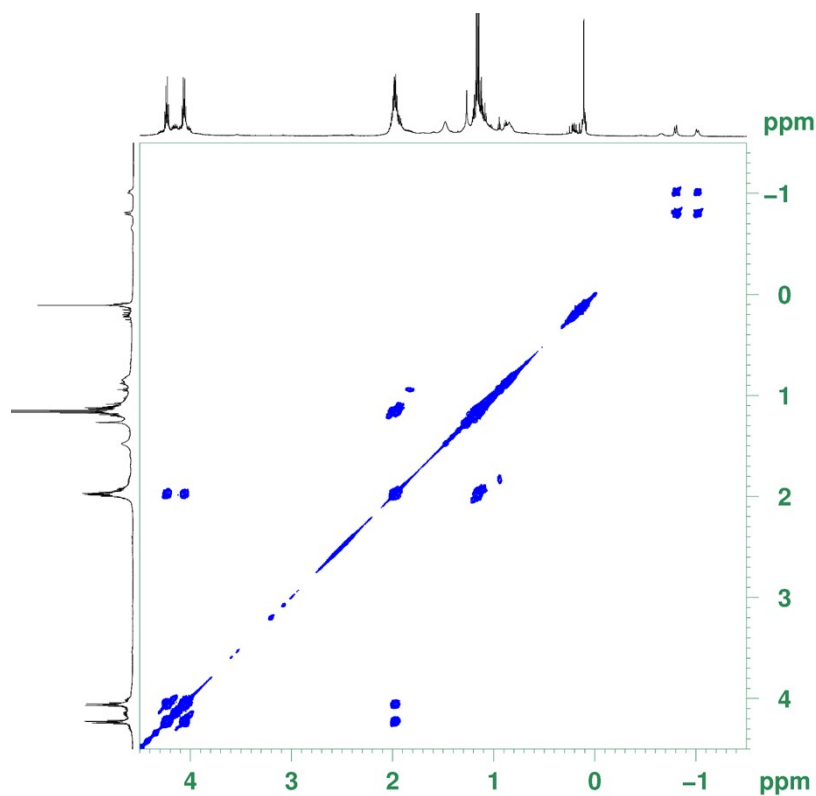

**Figure S54:** Significant portion of 2D-DQF COSY spectrum of  $7^{2+}@PrS[6]^{nPr}$  ( $CD_2Cl_2$ , 600 MHz, 298 K).

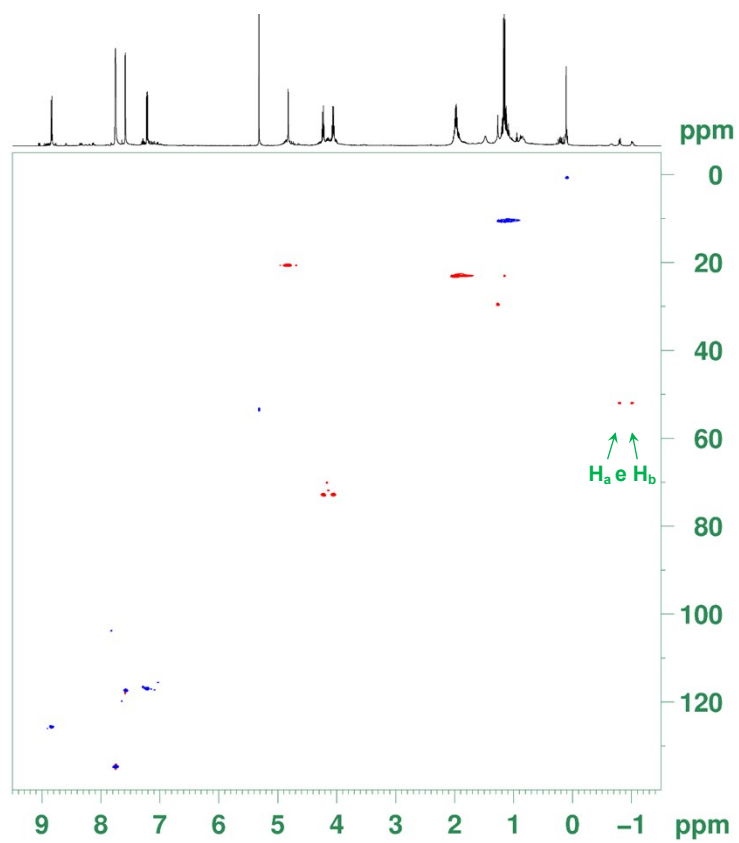

**Figure S55:** 2D-HSQC spectrum of  $7^{2+}@PrS[6]^{nPr}$  ( $CD_2Cl_2$ , 600 MHz, 298 K).

## <sup>1</sup>H NMR determination of $K_{\text{ass}}$ values.

The association constant values for the formation of the complexes were calculated by means of three methods<sup>2</sup>:

- Integration of free and complexed <sup>1</sup>H NMR signals of host or guest. In this case, an equimolar solution of hosts and guests was solubilized in CD<sub>2</sub>Cl<sub>2</sub> and equilibrated in NMR tube after mixing for 24-90 h at 40 °C.
- <sup>1</sup>H NMR competition experiments. In this case, was performed an analysis of a 1:1:1 mixture of host, and two guests in an NMR tube and CD<sub>2</sub>Cl<sub>2</sub> as solvent.
- Quantitative <sup>1</sup>H NMR experiments using TCE as the internal standard<sup>4</sup>. In this case, <sup>1</sup>H NMR experiments were carried out on a 1:1 mixture of host and guest in CD<sub>2</sub>Cl<sub>2</sub> containing 0.5 μL of 1,1,2,2-tetrachloroethane (d = 1.59 g/mL) as internal standard.  
*Further details are reported in the figure's captions*

**Table S2.** Association constant ( $K_{\text{ass}}$ , M<sup>-1</sup>) values for the formation of the complexes between the ammonium **5**<sup>2+</sup> - **9**<sup>2+</sup> cations as BARF<sup>-</sup> salts and the prism[n]arenes. Determined by <sup>1</sup>H NMR experiments in CD<sub>2</sub>Cl<sub>2</sub>. Errors < 15% calculated as mean values of three measures.

|                        | PrS[5] <sup>Me</sup>                          | PrS[6] <sup>Me</sup>                          | PrS[5] <sup>Et</sup>                          | PrS[6] <sup>Et</sup>                          | PrS[5] <sup>nPr</sup>                         | PrS[6] <sup>nPr</sup>                         |
|------------------------|-----------------------------------------------|-----------------------------------------------|-----------------------------------------------|-----------------------------------------------|-----------------------------------------------|-----------------------------------------------|
| <b>5</b> <sup>2+</sup> | <b>3.9·10<sup>7</sup> M<sup>-1</sup></b> [1]  | 50 M <sup>-1</sup> [1]                        | <b>1.4·10<sup>8</sup> M<sup>-1</sup></b> [2]  | 790 M <sup>-1</sup> [5]                       | <b>1.7·10<sup>8</sup> M<sup>-1</sup></b> [3]  | 400 M <sup>-1</sup> [4]                       |
| <b>6</b> <sup>+</sup>  | 90 M <sup>-1</sup> [1]                        | 2.7·10 <sup>3</sup> M <sup>-1</sup> [1]       | 50 M <sup>-1</sup> [6]                        | 2745 M <sup>-1</sup> [7]                      | 100 M <sup>-1</sup> [8]                       | 340 M <sup>-1</sup> [9]                       |
| <b>7</b> <sup>2+</sup> | <b>1.8·10<sup>7</sup> M<sup>-1</sup></b> [1]  | ----                                          | <b>2.8·10<sup>8</sup> M<sup>-1</sup></b> [10] | <b>1.0·10<sup>8</sup> M<sup>-1</sup></b> [11] | <b>1.4·10<sup>9</sup> M<sup>-1</sup></b> [12] | <b>1.2·10<sup>8</sup> M<sup>-1</sup></b> [13] |
| <b>8</b> <sup>2+</sup> | <b>6.6·10<sup>6</sup> M<sup>-1</sup></b> [14] | <b>4.2·10<sup>3</sup> M<sup>-1</sup></b> [19] | <b>2.9·10<sup>6</sup> M<sup>-1</sup></b> [15] | <b>420 M<sup>-1</sup></b> [21]                | <b>6.3·10<sup>7</sup> M<sup>-1</sup></b> [23] | <b>370 M<sup>-1</sup></b> [22]                |
| <b>9</b> <sup>2+</sup> | <b>5780 M<sup>-1</sup></b> [16]               | <b>3.7·10<sup>3</sup> M<sup>-1</sup></b> [18] | <b>1.0·10<sup>5</sup> M<sup>-1</sup></b> [17] | ----                                          | <b>4.8·10<sup>5</sup> M<sup>-1</sup></b> [20] | ----                                          |

[1] Reported in reference 2. [2] Calculated by competition experiment at 298 K with **PrS[5]<sup>Me</sup>** (see Figure S56 and its caption). [3] Calculated by competition experiment at 298 K with **PrS[5]<sup>Me</sup>** (see Figure S57 and its caption). [4] Calculated by integration at 298 K of <sup>1</sup>H NMR signals of free and complexed species (see Figure S58 and its caption). [5] Calculated by integration at 298 K of <sup>1</sup>H NMR signals of free and complexed species (see Figure S59 and its caption). [6] Calculated by quantitative <sup>1</sup>H NMR spectroscopy using TCE as internal standard. [7] Calculated by integration at 183 K of <sup>1</sup>H NMR signals of free and complexed species (see Figure S60 and its caption). [8] Calculated by quantitative <sup>1</sup>H NMR spectroscopy at 183 K. [9] Calculated by integration at 183 K of <sup>1</sup>H NMR signals of free and complexed species (see Figure S61 and its caption). [10] Calculated by competition experiment at 298 K with **PrS[5]<sup>Me</sup>** (see Figure S62 and its caption). [11] Calculated by competition experiment at 298 K with **PrS[5]<sup>Me</sup>** (see Figure S63 and its caption). [12] Calculated by competition experiment at 298 K with **PrS[5]<sup>Me</sup>** (see Figure S64 and its caption). [13] Calculated by competition experiment at 298 K with **PrS[6]<sup>Et</sup>** (see Figure S65 and its caption). [14] Calculated by competition experiment at 298 K with **5**<sup>2+</sup> (see Figure S66 and its caption). [15] Calculated by competition experiment at 298 K with **PrS[5]<sup>Me</sup>** (see Figure S67 and its caption). [16] Calculated by integration at 298 K of <sup>1</sup>H NMR signals of free and complexed species (see Figure S68 and its caption). [17] Calculated by competition experiment at 298 K with **PrS[5]<sup>Me</sup>** (see Figure S69 and its caption). [18] Calculated by competition experiment at 298 K with **PrS[5]<sup>Et</sup>** (see Figure S70 and its caption). [19] Calculated by competition experiment at 298 K with **9**<sup>2+</sup> (see Figure S71 and its caption). [20] Calculated by competition experiment at 298 K with **PrS[5]<sup>Me</sup>** (see Figure S72 and its caption). [21] Calculated by competition experiment at 298 K with **PrS[6]<sup>Me</sup>** (see Figure S74 and its caption). [22] Calculated by competition experiment at 298 K with **PrS[6]<sup>Me</sup>** (see Figure S75 and its caption). [23] Calculated by competition experiment at 298 K with **PrS[5]<sup>Me</sup>** (see Figure S73 and its caption).

<sup>2</sup> P. Della Sala, R. Del Regno, C. Talotta, A. Capobianco, N. Hickey, S. Geremia, M. De Rosa, A. Spinella, A. Soriente, P. Neri, C. Gaeta, *J. Am. Chem. Soc.* **2020**, *142*, 1752–1756.

The competition experiments in red and orange are described at pag S54

The competition experiments in purple are described at pag S67

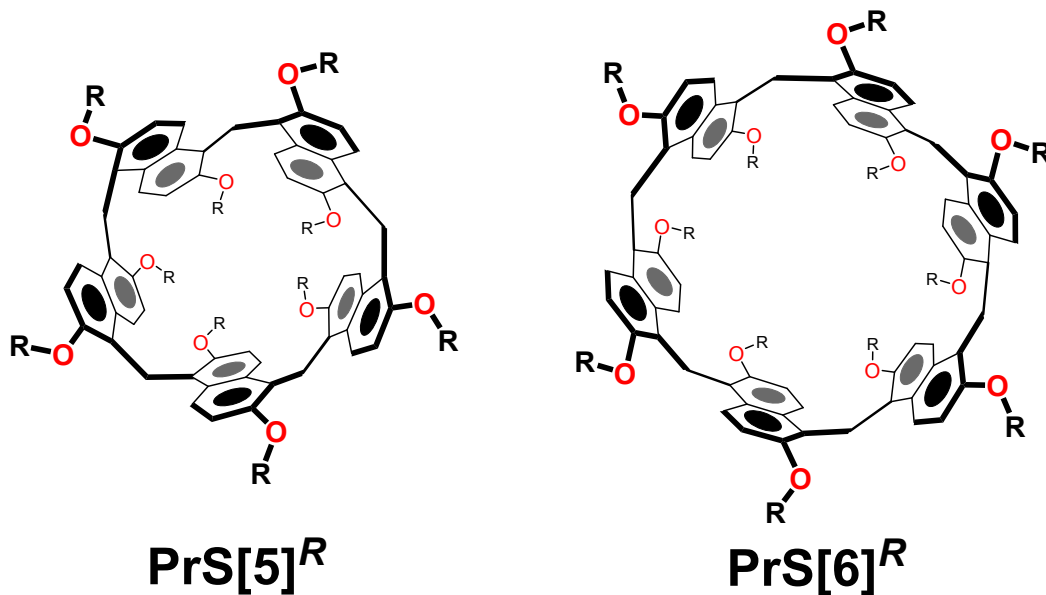

R = Me    R= Et    R= nPr

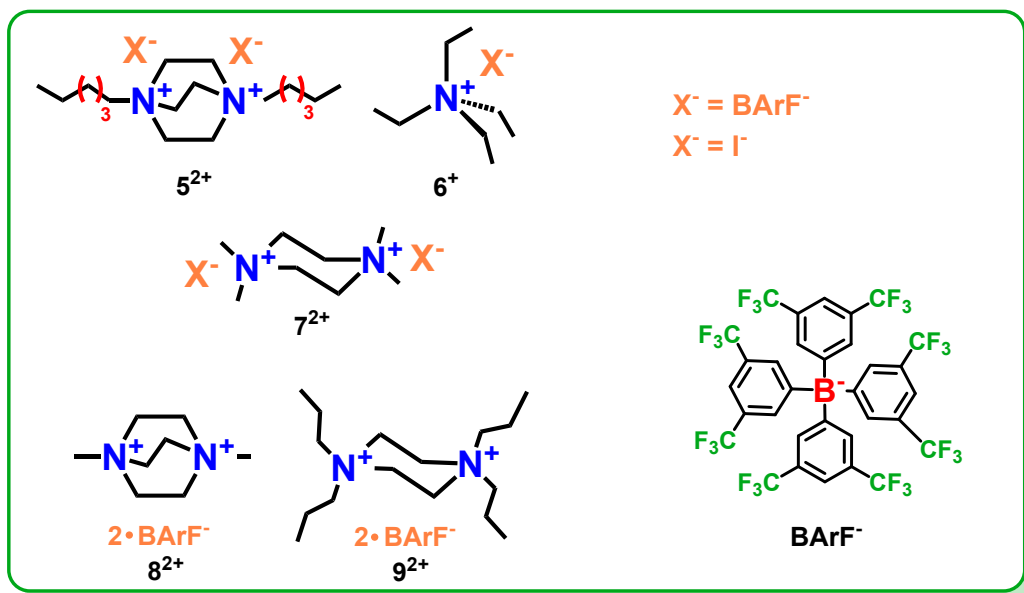

$K(5^{2+}@PrS[5]^{Me}) = 3.9 \cdot 10^7 \text{ M}^{-1}$  (by reference [2])

Competition experiment:  $5^{2+} + PrS[5]^{Me} + PrS[5]^{Et} = 5^{2+}@PrS[5]^{Me} + 5^{2+}@PrS[5]^{Et} \rightarrow K(5^{2+}@PrS[5]^{Et}) = 1.4 \cdot 10^8 \text{ M}^{-1}$  (figure S56)

Competition experiment:  $5^{2+} + PrS[5]^{Me} + PrS[5]^{nPr} = 5^{2+}@PrS[5]^{Me} + 5^{2+}@PrS[5]^{nPr} \rightarrow K(5^{2+}@PrS[5]^{nPr}) = 1.7 \cdot 10^8 \text{ M}^{-1}$  (figure S57)

Competition experiment:  $5^{2+} + PrS[5]^{Me} + 8^{2+} = 5^{2+}@PrS[5]^{Me} + 8^{2+}@PrS[5]^{Me} \rightarrow K(8^{2+}@PrS[5]^{Me}) = 6.6 \cdot 10^6 \text{ M}^{-1}$  (figure S66)

Competition experiment:  $8^{2+} + PrS[5]^{Me} + PrS[5]^{Et} = 8^{2+}@PrS[5]^{Me} + 8^{2+}@PrS[5]^{Et} \rightarrow K(8^{2+}@PrS[5]^{Et}) = 2.9 \cdot 10^6 \text{ M}^{-1}$  (figure S67)

$K(7^{2+}@PrS[5]^{Me}) = 1.8 \cdot 10^7 \text{ M}^{-1}$  (by reference [2])

Competition experiment:  $7^{2+} + PrS[5]^{Me} + PrS[5]^{Et} = 7^{2+}@PrS[5]^{Me} + 7^{2+}@PrS[5]^{Et} \rightarrow K(7^{2+}@PrS[5]^{Et}) = 2.8 \cdot 10^8 \text{ M}^{-1}$  (figure S62)

Competition experiment:  $7^{2+} + PrS[5]^{Me} + PrS[6]^{Et} = 7^{2+}@PrS[5]^{Me} + 7^{2+}@PrS[6]^{Et} \rightarrow K(7^{2+}@PrS[6]^{Et}) = 1.0 \cdot 10^8 \text{ M}^{-1}$  (figure S63)

Competition experiment:  $7^{2+} + PrS[5]^{Me} + PrS[5]^{nPr} = 7^{2+}@PrS[5]^{Me} + 7^{2+}@PrS[5]^{nPr} \rightarrow K(7^{2+}@PrS[5]^{nPr}) = 1.4 \cdot 10^9 \text{ M}^{-1}$  (figure S64)

Competition experiment:  $7^{2+} + PrS[6]^{nPr} + PrS[6]^{Et} = 7^{2+}@PrS[6]^{Et} + 7^{2+}@PrS[6]^{nPr} \rightarrow K(7^{2+}@PrS[6]^{nPr}) = 1.2 \cdot 10^8 \text{ M}^{-1}$  (figure S65)

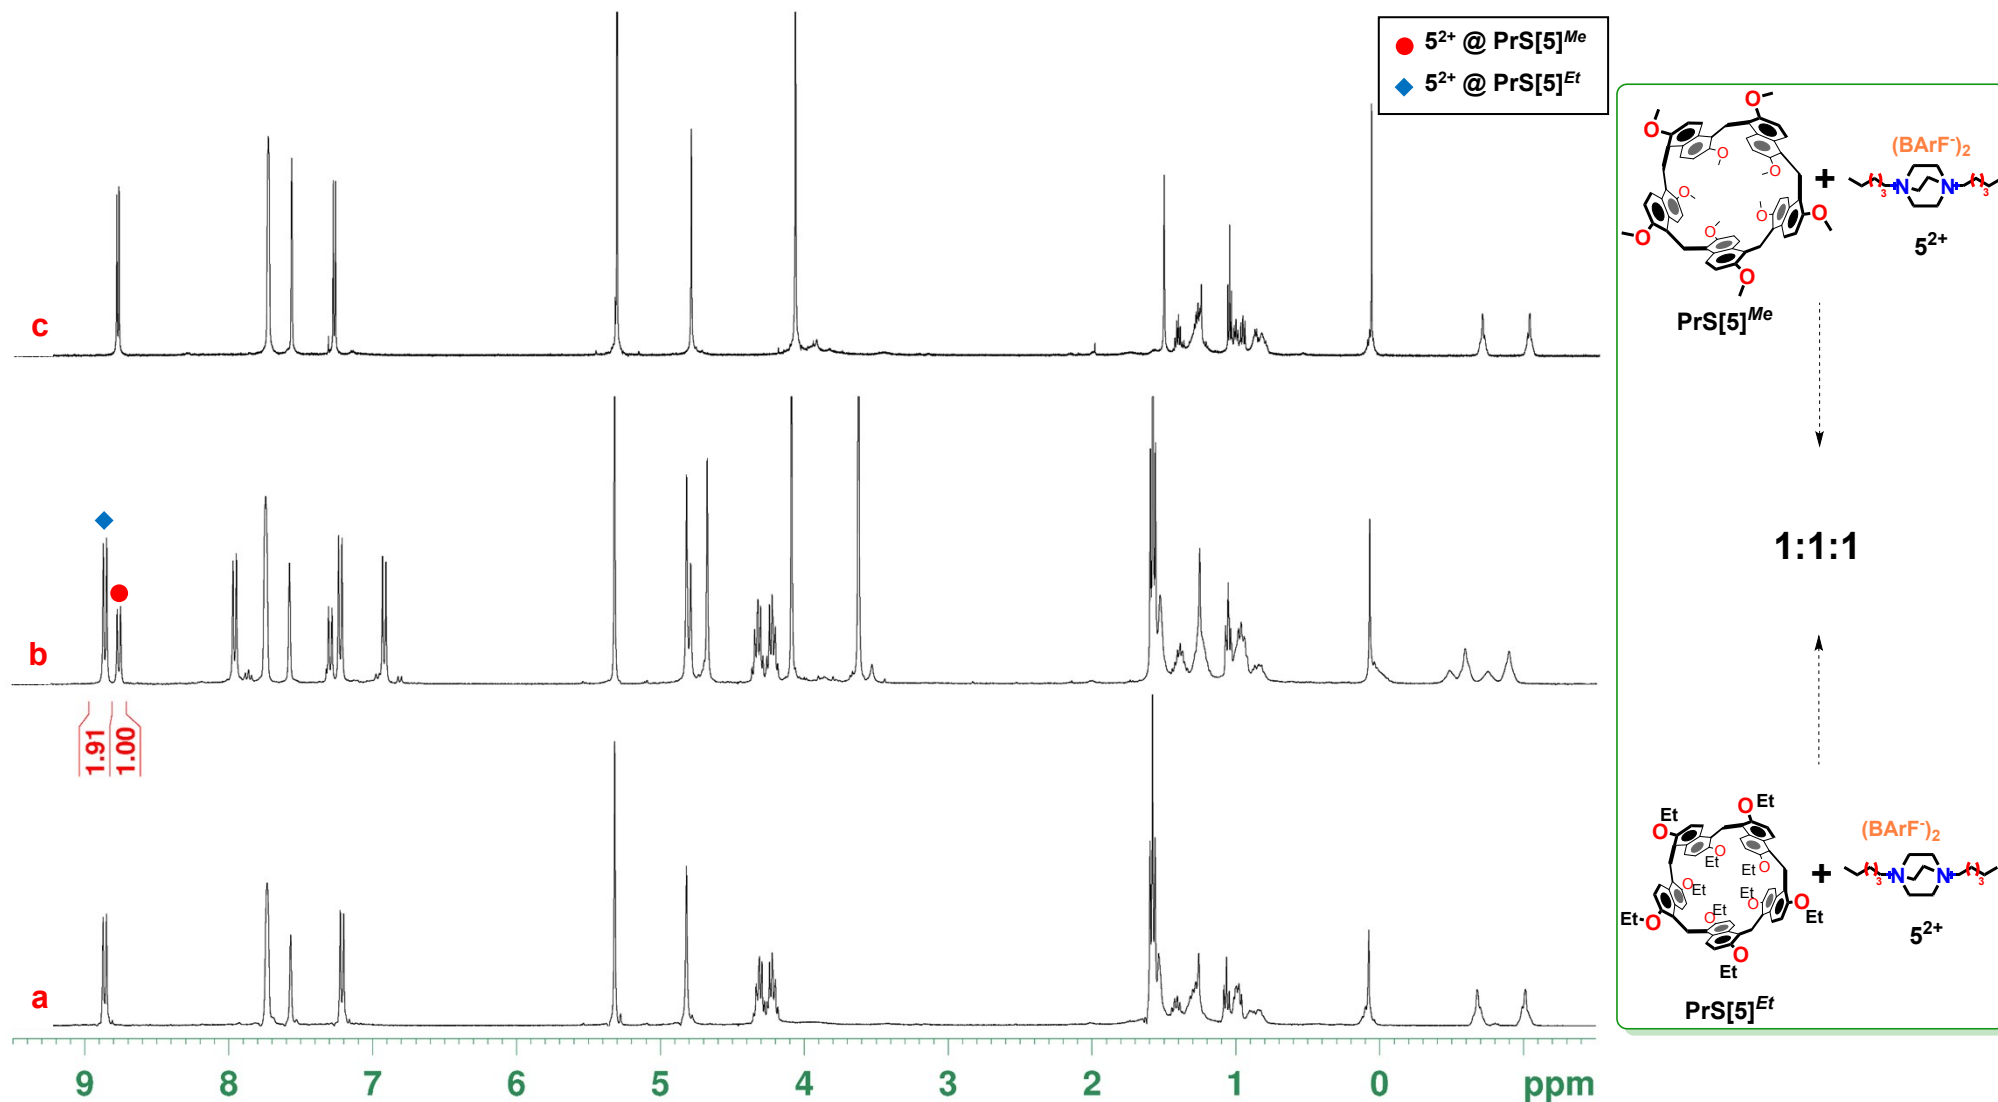

**Figure S56:**  $^1\text{H}$  NMR spectra (400 MHz,  $\text{CD}_2\text{Cl}_2$ , 298 K) of: (a) an equimolar solution (2.50 mM) of  $\text{PrS}[5]^{Et}$  and  $5(\text{BArF})_2$  in 0.7 mL of  $\text{CD}_2\text{Cl}_2$ , (b) of  $\text{PrS}[5]^{Me}$  in the presence of 1 equivalent of  $\text{PrS}[5]^{Et}$  and 1 equivalent of  $5(\text{BArF})_2$  and (c) an equimolar solution (2.50 mM) of  $\text{PrS}[5]^{Me}$  and  $5(\text{BArF})_2$  in 0.7 mL of  $\text{CD}_2\text{Cl}_2$ .

$$\text{Method B: } K_{\text{rel}} = K(5^{2+} @ \text{PrS}[5]^{Et}) / K(5^{2+} @ \text{PrS}[5]^{Me}) = K(5^{2+} @ \text{PrS}[5]^{Et}) / 3.9 \times 10^7 = [(1.91/2.91) \times 0.0025]^2 / [(1.00/2.91) \times 0.0025]^2$$

$$K(5^{2+} @ \text{PrS}[5]^{Et}) = 3.65 \times 3.9 \cdot 10^7 = 1.4 \cdot 10^8 \text{ M}^{-1}$$

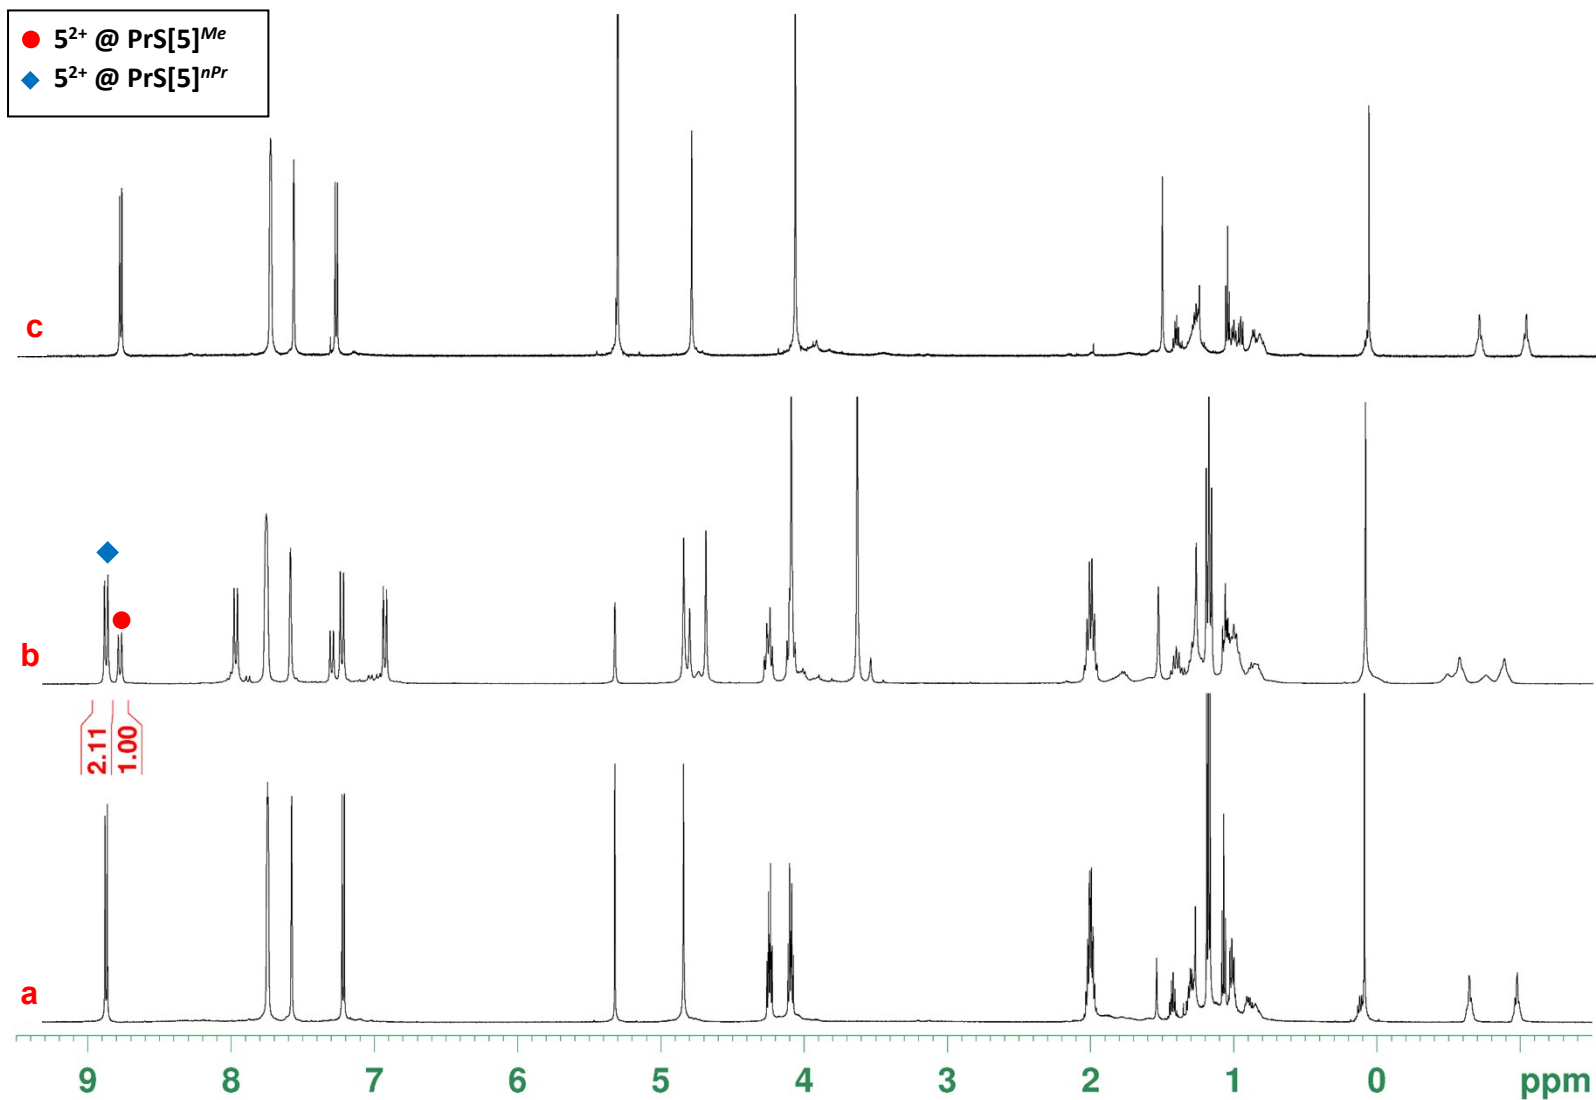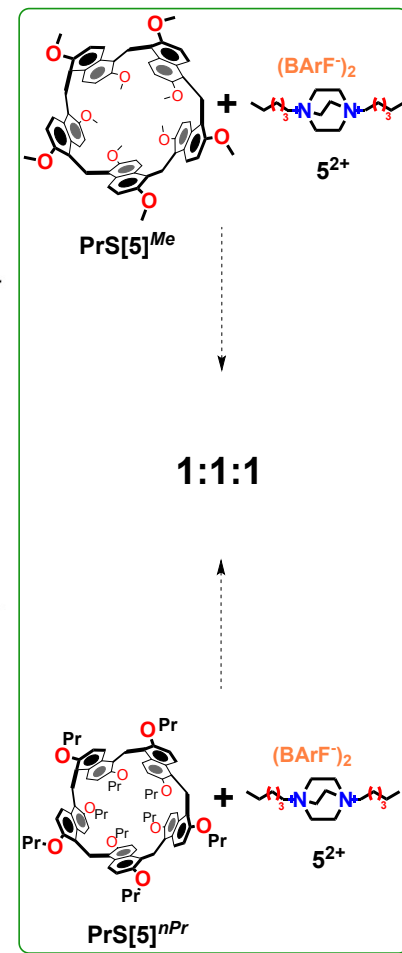

**Figure S57:**  $^1\text{H}$  NMR spectra (400 MHz,  $\text{CD}_2\text{Cl}_2$ , 298 K) of: (a) an equimolar solution (2.23 mM) of  $\text{PrS}[5]^{nPr}$  and  $5(\text{BArF})_2$  in 0.7 mL of  $\text{CD}_2\text{Cl}_2$ , (b) of  $\text{PrS}[5]^{Me}$  in the presence of 1 equivalent of  $\text{PrS}[5]^{nPr}$  and 1 equivalent of  $5(\text{BArF})_2$  and (c) an equimolar solution (2.23 mM) of  $\text{PrS}[5]^{Me}$  and  $5(\text{BArF})_2$  in 0.7 mL of  $\text{CD}_2\text{Cl}_2$ .

$$\text{Method B: } K_{\text{rel}} = K(5^{2+}@\text{PrS}[5]^{nPr}) / K(5^{2+}@\text{PrS}[5]^{Me}) = K(5^{2+}@\text{PrS}[5]^{nPr}) / 3.9 \times 10^7 = [(2.11/3.11) \times 0.0022]^2 / [(1.00/3.11) \times 0.0022]^2$$

$$K(5^{2+}@\text{PrS}[5]^{nPr}) = 4.46 \times 3.9 \cdot 10^7 = 1.7 \cdot 10^8 \text{ M}^{-1}$$



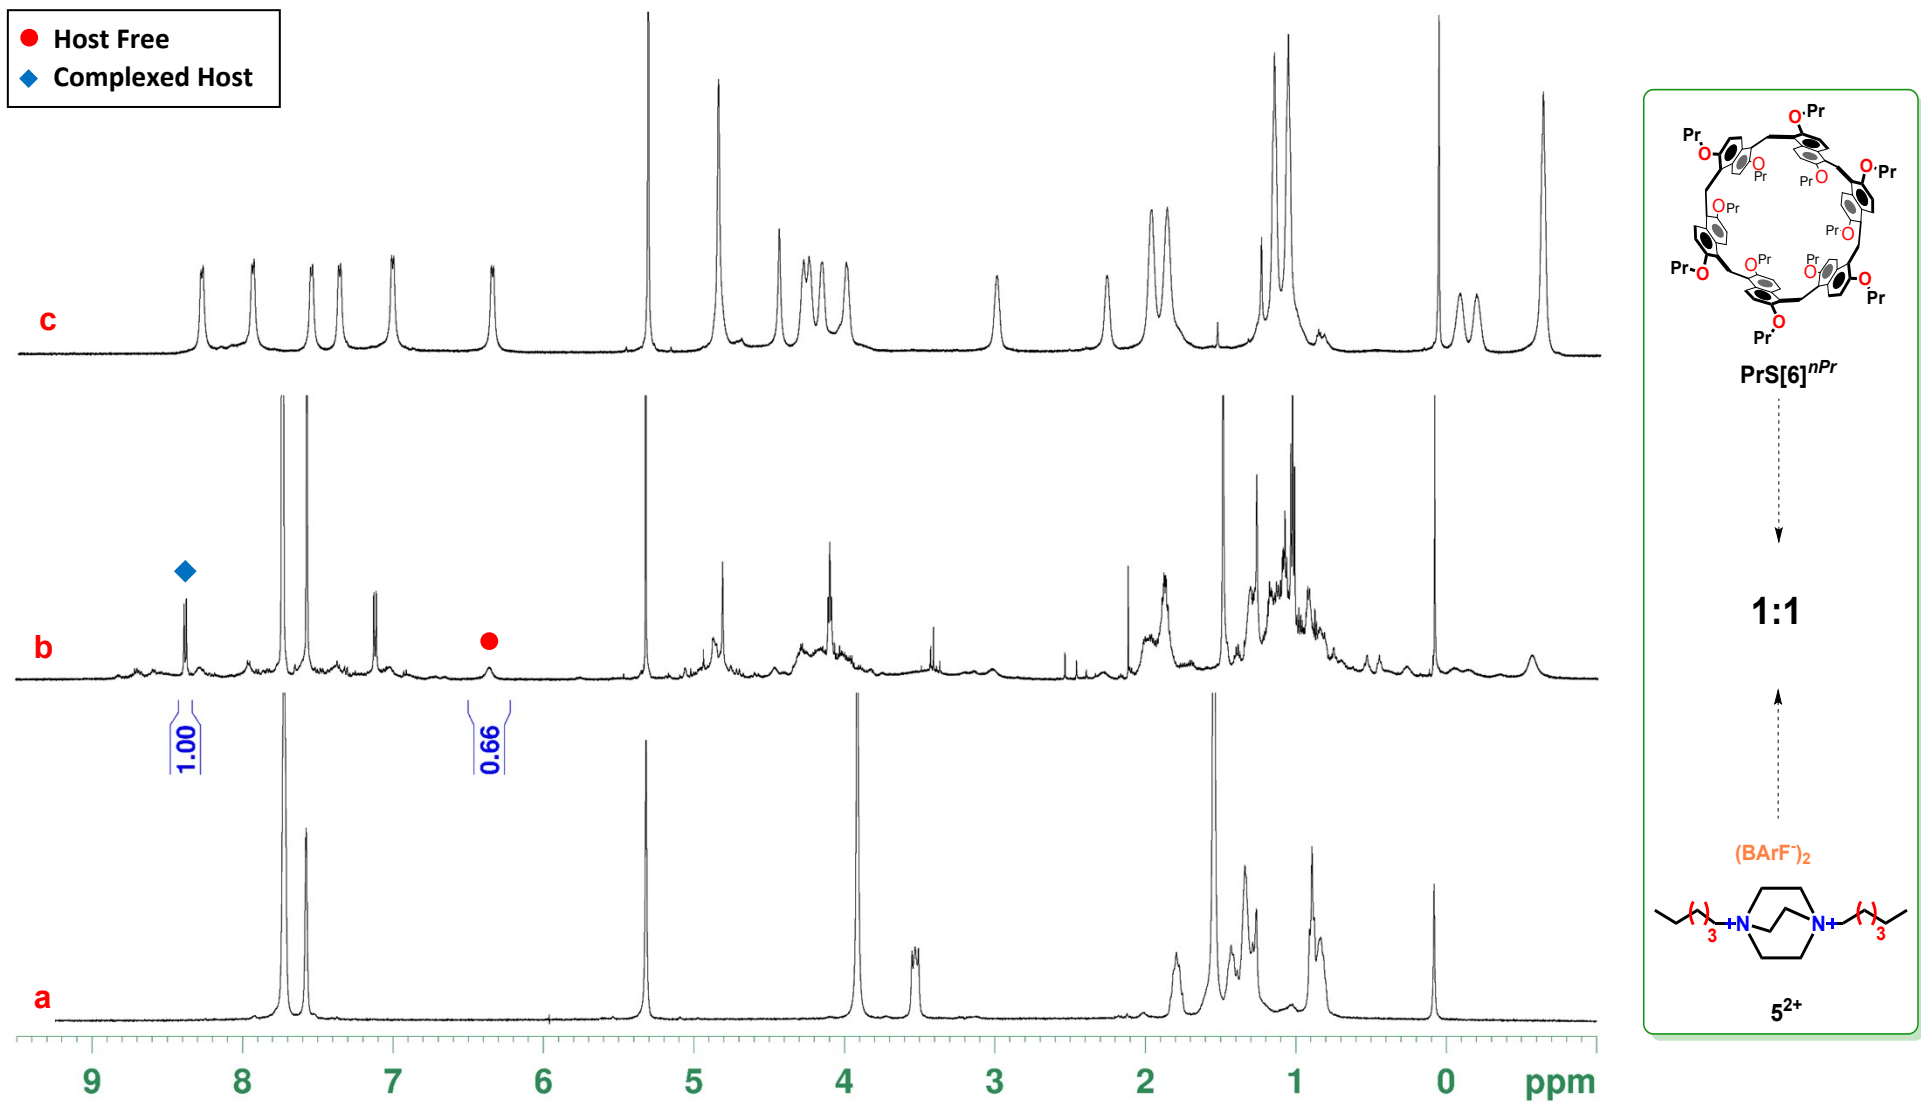

**Figure S58:**  $^1\text{H}$  NMR spectra (600 MHz,  $\text{CD}_2\text{Cl}_2$ , 298 K) of: (a) a solution of  $5(\text{BArF})_2$  (b) an equimolar solution (2.00 mM) of  $\text{PrS}[6]^{nPr}$  and  $5(\text{BArF})_2$  in 0.7 mL of  $\text{CD}_2\text{Cl}_2$  and (c) a solution of  $\text{PrS}[6]^{nPr}$ .

**Method A:** Integral normalization:  $1/12 = 0.08$  and  $0.66/4 = 0.16$ .  $[\text{5}^{2+}@\text{PrS}[6]^{nPr}] = [(0.08/0.24) \times 0.002] = 6.7 \cdot 10^{-4}$ ;  $[\text{PrS}[6]^{nPr}]_{\text{free}} = [\text{5}^{2+}]_{\text{free}} = 0.0013$ ;  $K(\text{5}^{2+}@\text{PrS}[6]^{nPr}) = 6.7 \cdot 10^{-4} / 1.7 \cdot 10^{-6} = 400 \text{ M}^{-1}$

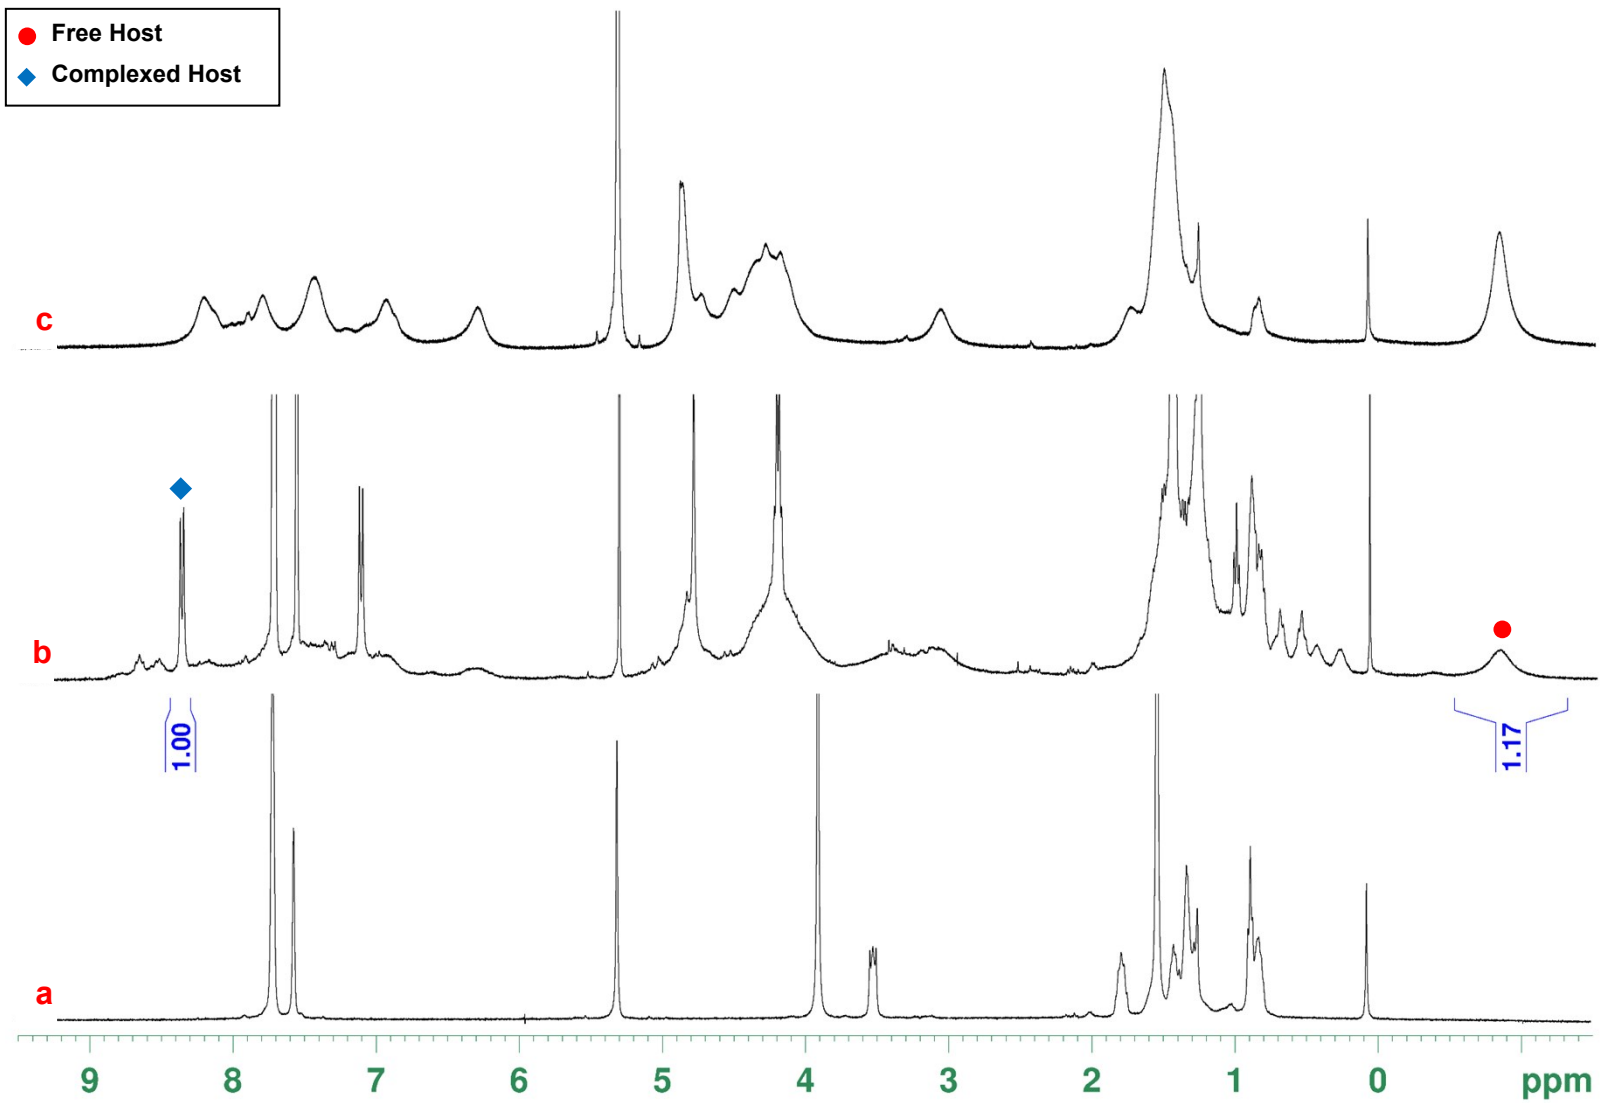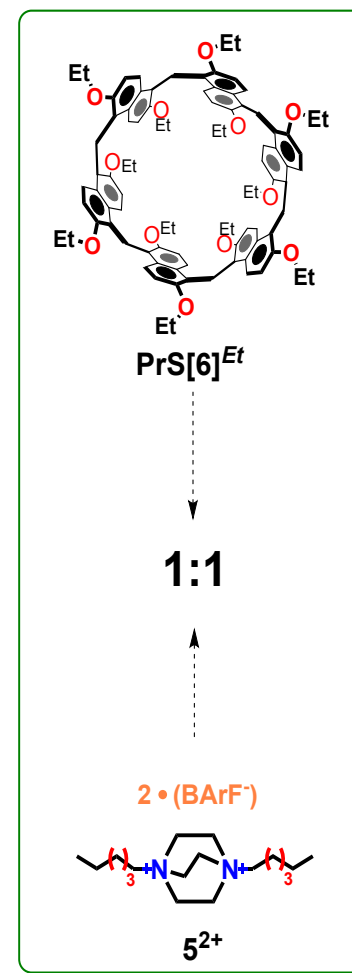

Figure S59:  $^1\text{H}$  NMR spectra (600 MHz,  $\text{CD}_2\text{Cl}_2$ , 298 K) of: (a) a solution of  $\text{PrS}[6]^{\text{Et}}$  (b) an equimolar solution (2.00 mM) of  $\text{PrS}[6]^{\text{Et}}$  and  $5(\text{BArF})_2$  in 0.7 mL of  $\text{CD}_2\text{Cl}_2$  and (c) a solution of  $5(\text{BArF})_2$ .

$$\text{Method A: } [5^{2+} @ \text{PrS}[6]^{\text{Et}}] = [(1.00/2.17) \times 0.002] = 9.21 \cdot 10^{-4}; [\text{PrS}[6]^{\text{Et}}]_{\text{free}} = [5^{2+}]_{\text{free}} = 0.0011; K(5^{2+} @ \text{PrS}[6]^{\text{Et}}) =$$

$$9.21 \cdot 10^{-4} / 1.16 \cdot 10^{-6} = 790 \text{ M}^{-1}$$

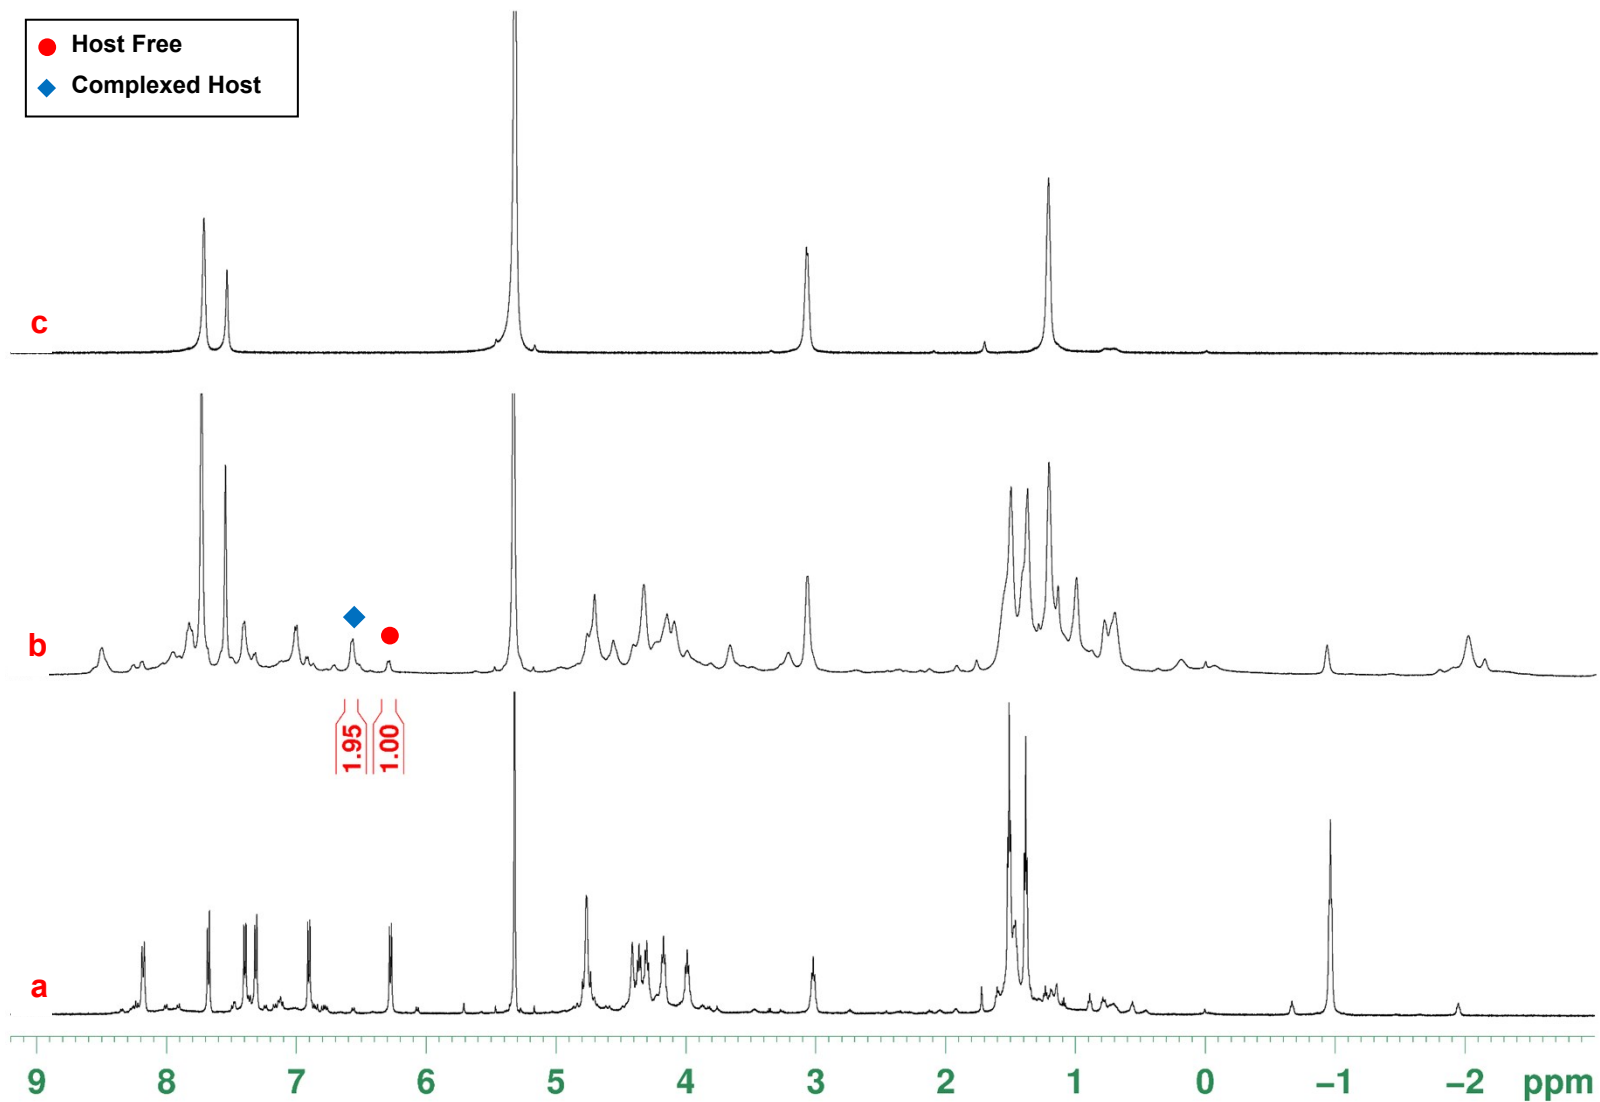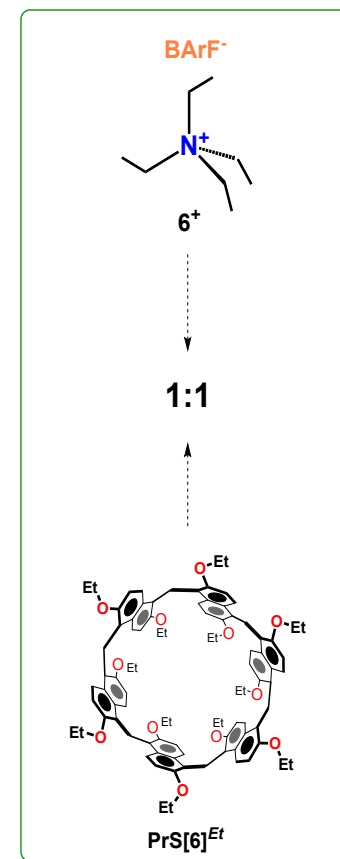

**Figure S60:** <sup>1</sup>H NMR spectra (600 MHz, CD<sub>2</sub>Cl<sub>2</sub>, 183 K) of: (a) a solution of PrS[6]<sup>Et</sup> (b) an equimolar solution (2.1 mM) of PrS[6]<sup>Et</sup> and 6(BArF) in 0.7 mL of CD<sub>2</sub>Cl<sub>2</sub> and (c) a solution of 6(BArF).

**Method A:**  $[6^+@PrS[6]^{Et}] = [(1.95/2.95) \times 0.0021] = 0.0014$ ;  $[PrS[6]^{Et}]_{free} = [6^+]_{free} = 7.1 \cdot 10^{-4}$ ;  $K(6^+@PrS[6]^{Et}) = 0.0014/5.1 \cdot 10^{-7} = 2745 \text{ M}^{-1}$

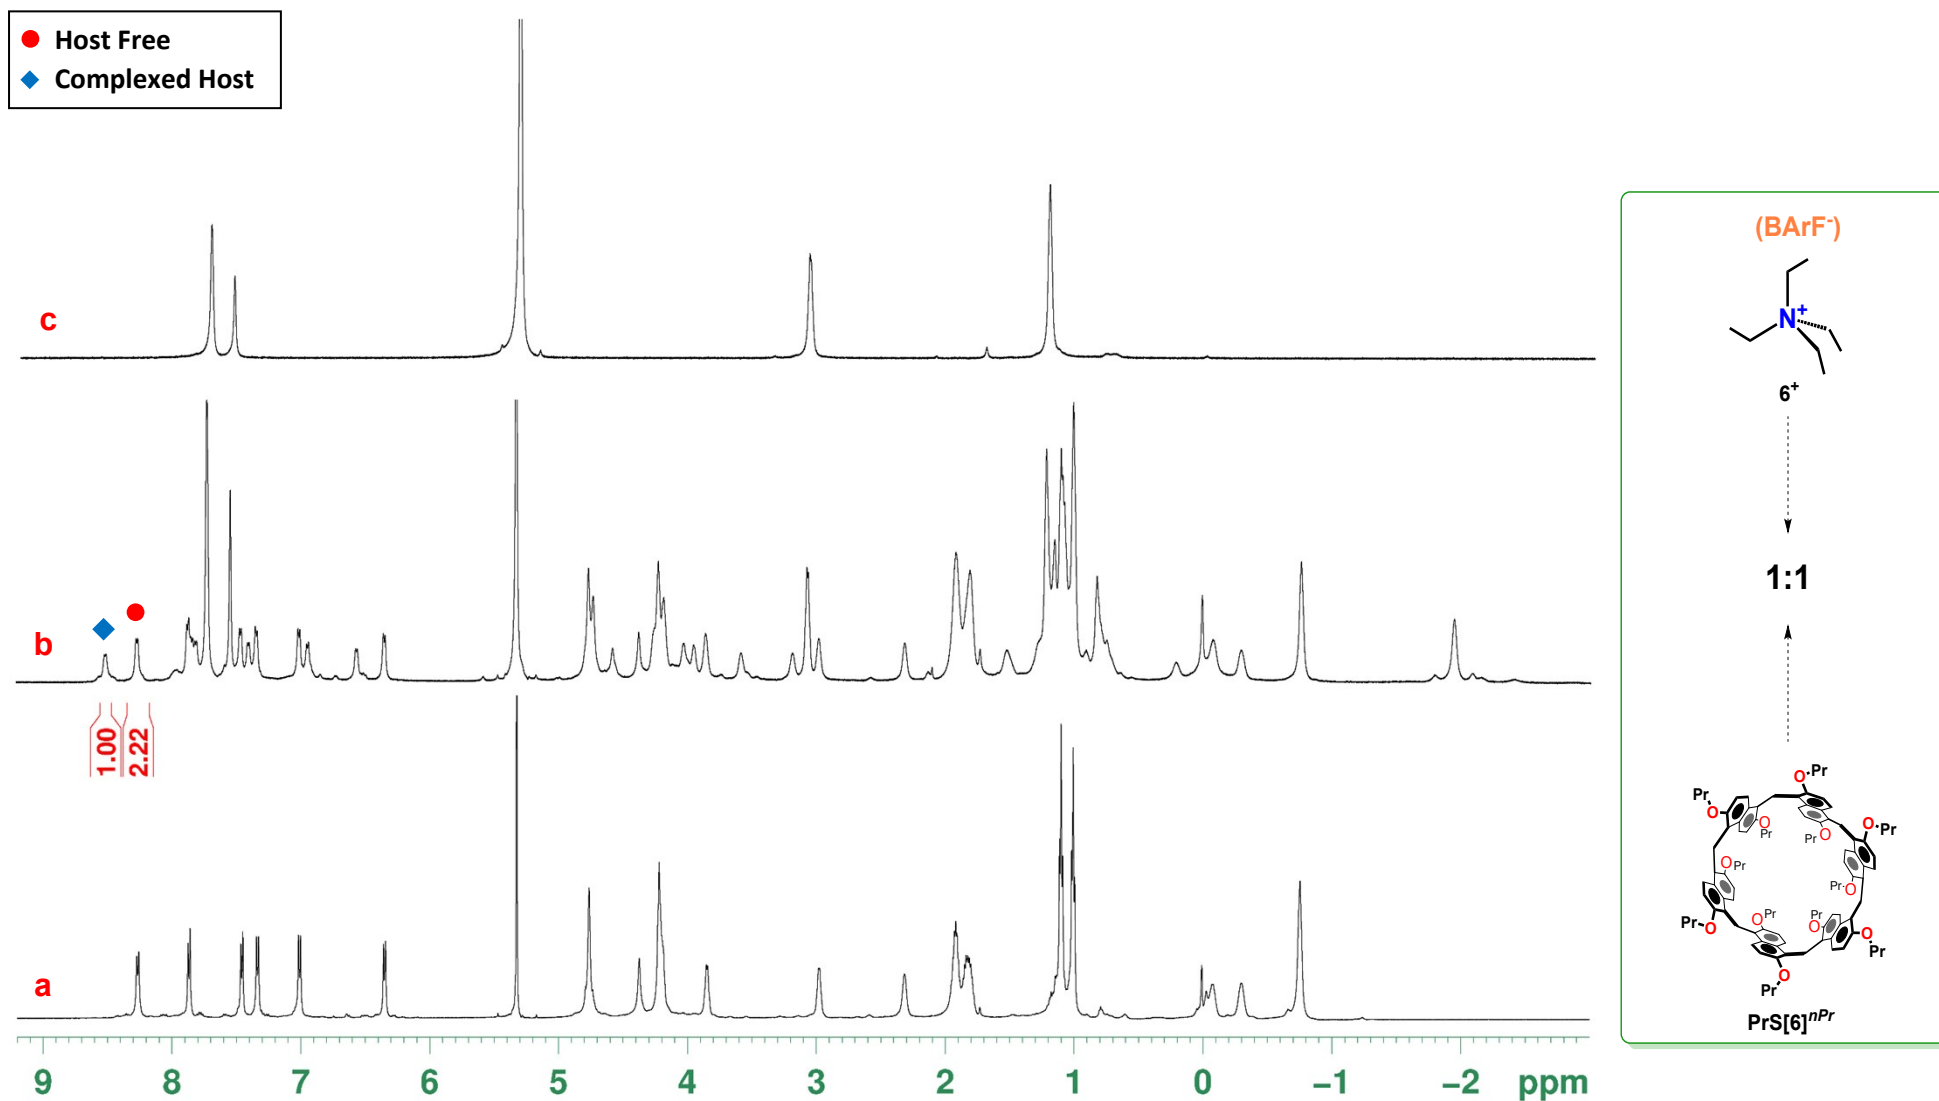

**Figure S61:**  $^1\text{H}$  NMR spectra (600 MHz,  $\text{CD}_2\text{Cl}_2$ , 183 K) of: (a) a solution of  $\text{PrS}[6]^{nPr}$  (b) an equimolar solution (1.86 mM) of  $\text{PrS}[6]^{nPr}$  and  $6(\text{BArF})$  in 0.7 mL of  $\text{CD}_2\text{Cl}_2$  and (c) a solution of  $6(\text{BArF})$ .

**Method A:**  $[\text{6}^+@ \text{PrS}[6]^{nPr}] = [(1.00/3.22) \times 0.00186] = 5.8 \cdot 10^{-4}$ ;  $[\text{PrS}[6]^{nPr}]_{\text{free}} = [\text{6}^+]_{\text{free}} = 0.0013$ ;  $K(\text{6}^+@ \text{PrS}[6]^{nPr}) = 5.8 \cdot 10^{-4} / 1.7 \cdot 10^{-6} = 340 \text{ M}^{-1}$

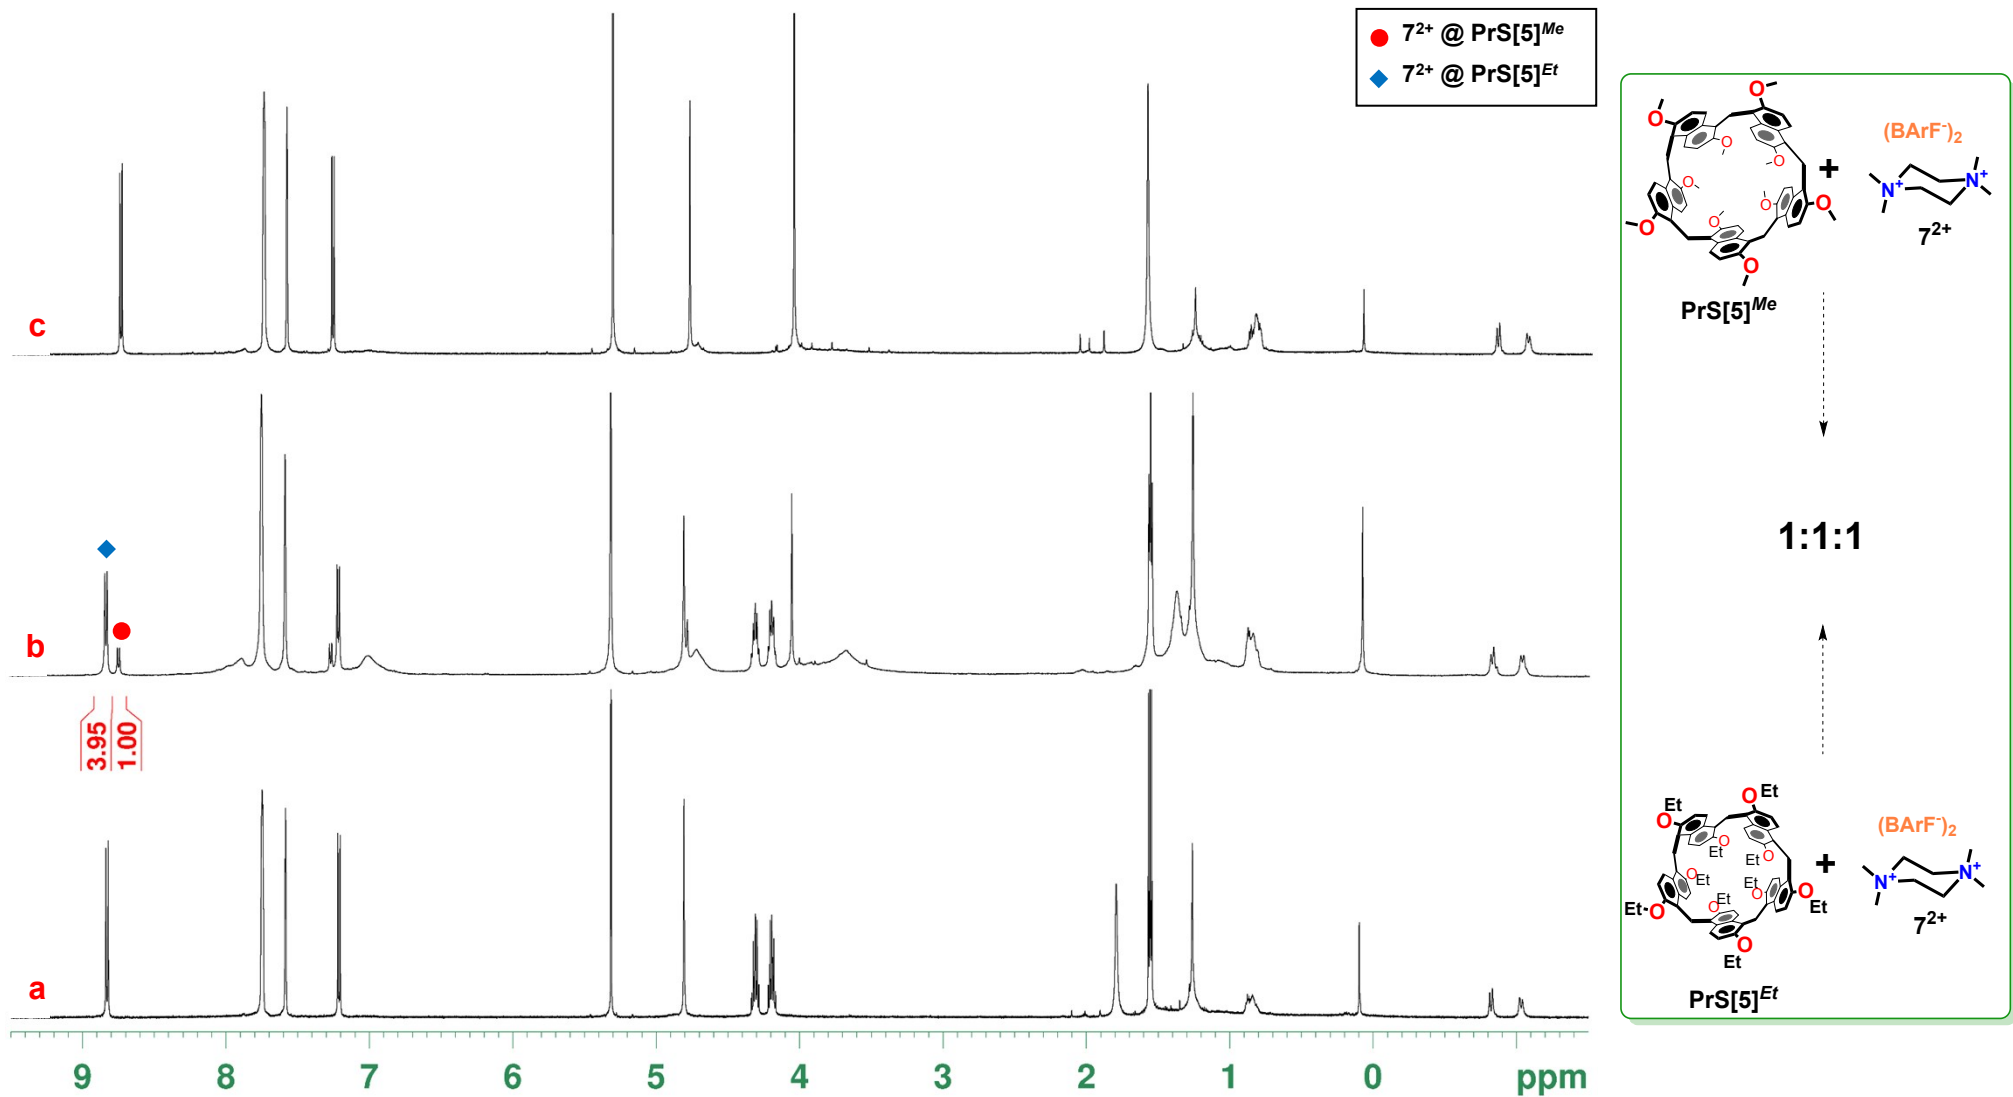

**Figure S62:**  $^1\text{H}$  NMR spectra (600 MHz,  $\text{CD}_2\text{Cl}_2$ , 298 K) of: (a) an equimolar solution (2.50 mM) of  $\text{PrS}[5]^{\text{Et}}$  and  $7(\text{BArF})_2$  in 0.7 mL of  $\text{CD}_2\text{Cl}_2$ , (b) of  $\text{PrS}[5]^{\text{Me}}$  in the presence of 1 equivalent of  $\text{PrS}[5]^{\text{Et}}$  and 1 equivalent of  $7(\text{BArF})_2$  and (c) an equimolar solution (2.50 mM) of  $\text{PrS}[5]^{\text{Me}}$  and  $7(\text{BArF})_2$  in 0.7 mL of  $\text{CD}_2\text{Cl}_2$ .

$$\text{Method B: } K_{\text{rel}} = K(7^{2+} @ \text{PrS}[5]^{\text{Et}}) / K(7^{2+} @ \text{PrS}[5]^{\text{Me}}) = K(7^{2+} @ \text{PrS}[5]^{\text{Et}}) / 1.8 \times 10^7 = [(3.95/4.95) \times 0.0025]^2 / [(1.00/4.95) \times 0.0025]^2$$

$$K(7^{2+} @ \text{PrS}[5]^{\text{Et}}) = 16 \times 1.8 \cdot 10^7 = 2.8 \cdot 10^8 \text{ M}^{-1}$$

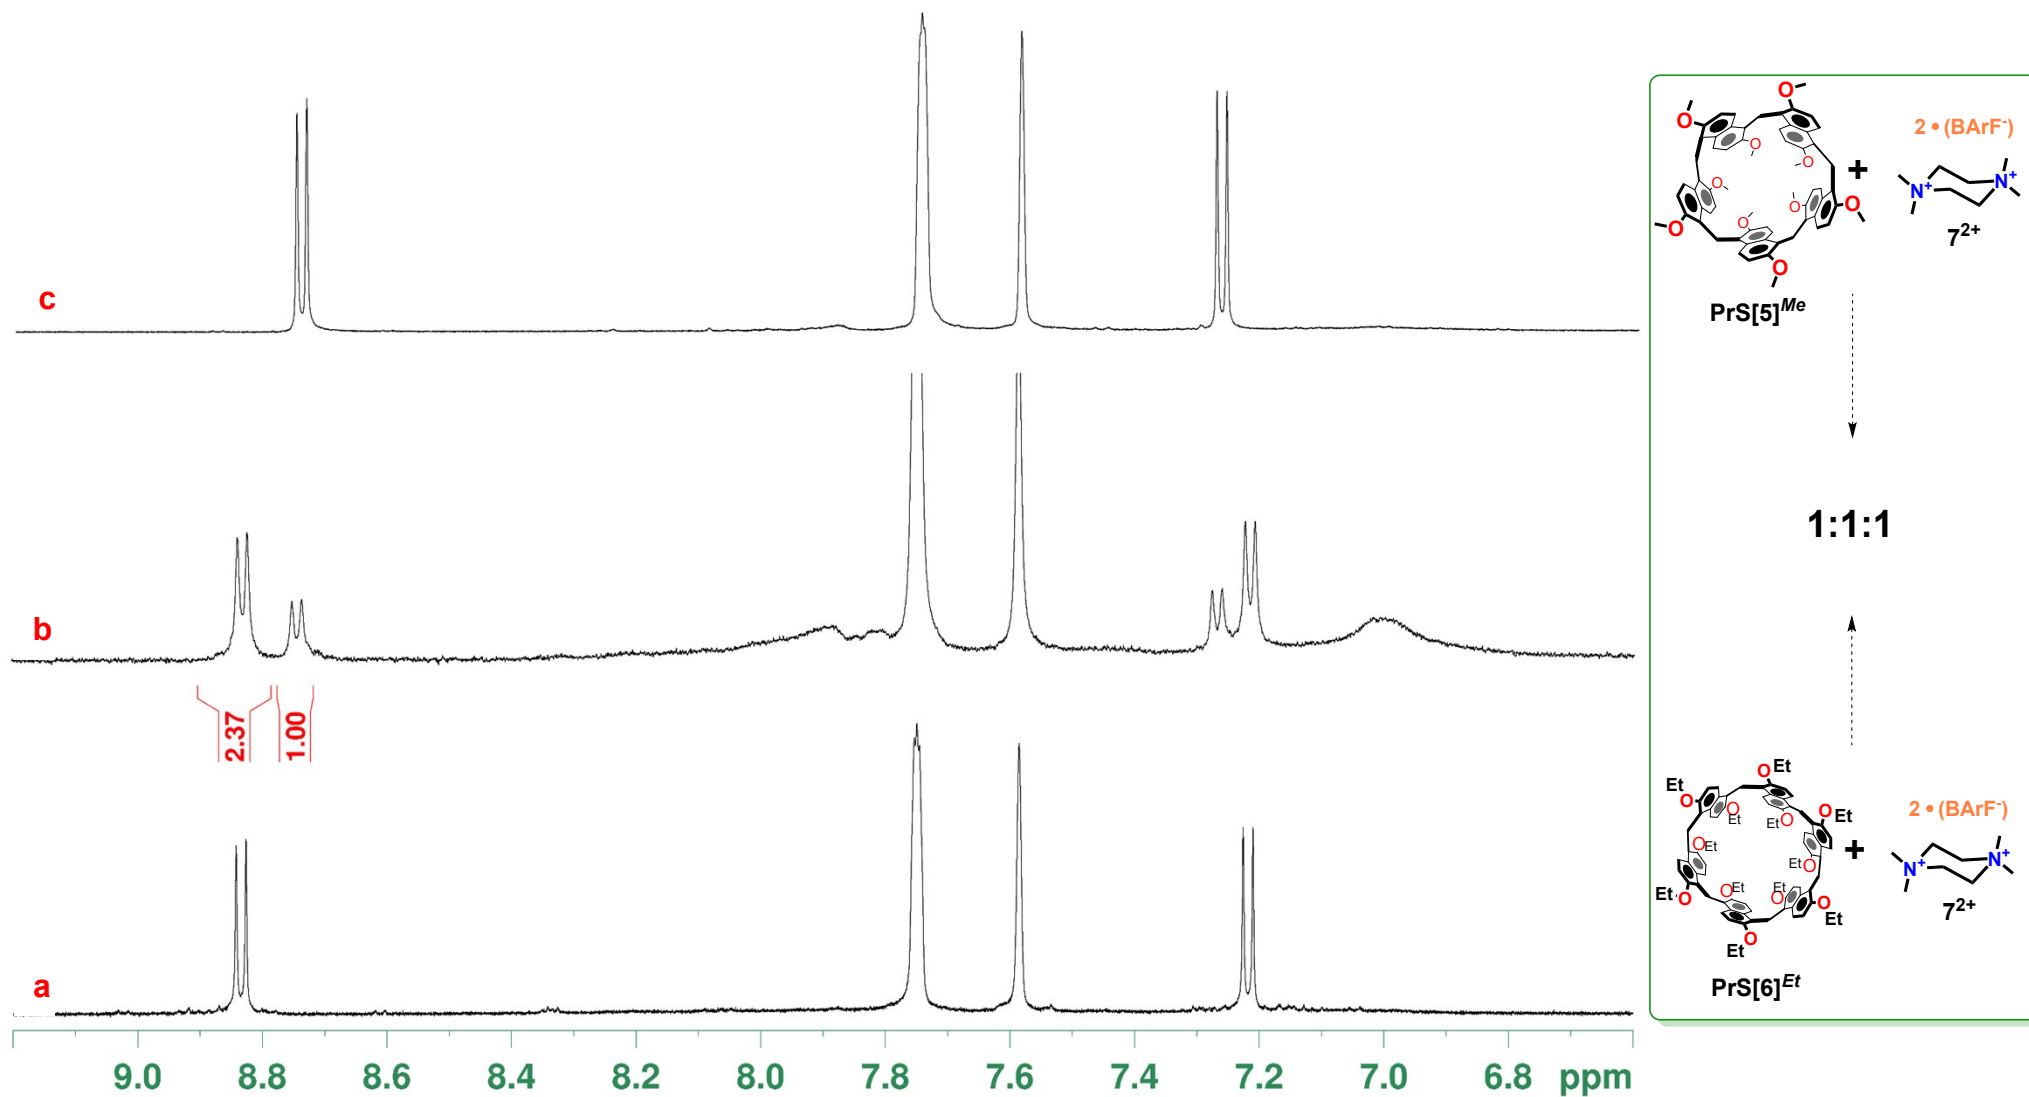

**Figure S63:** Significant portion of  $^1\text{H}$  NMR spectra (600 MHz,  $\text{CD}_2\text{Cl}_2$ , 298 K) of: (a) an equimolar solution (2.10 mM) of  $\text{PrS}[6]^{\text{Et}}$  and  $7(\text{BArF})_2$  in 0.7 mL of  $\text{CD}_2\text{Cl}_2$ , (b) of  $\text{PrS}[5]^{\text{Me}}$  in the presence of 1 equivalent of  $\text{PrS}[6]^{\text{Et}}$  and 1 equivalent of  $7(\text{BArF})_2$  and (c) an equimolar solution (2.10 mM) of  $\text{PrS}[5]^{\text{Me}}$  and  $7(\text{BArF})_2$  in 0.7 mL of  $\text{CD}_2\text{Cl}_2$ .

$$\text{Method B: } K_{\text{rel}} = K(7^{2+}@\text{PrS}[6]^{\text{Et}}) / K(7^{2+}@\text{PrS}[5]^{\text{Me}}) = K(5^{2+}@\text{PrS}[6]^{\text{Et}}) / 1.8 \times 10^7 = [(2.37/3.37) \times 0.0021]^2 / [(1.00/3.37) \times 0.0021]^2$$

$$K(7^{2+}@\text{PrS}[6]^{\text{Et}}) = 5.6 \times 1.8 \cdot 10^7 = 1.0 \cdot 10^8 \text{ M}^{-1}$$

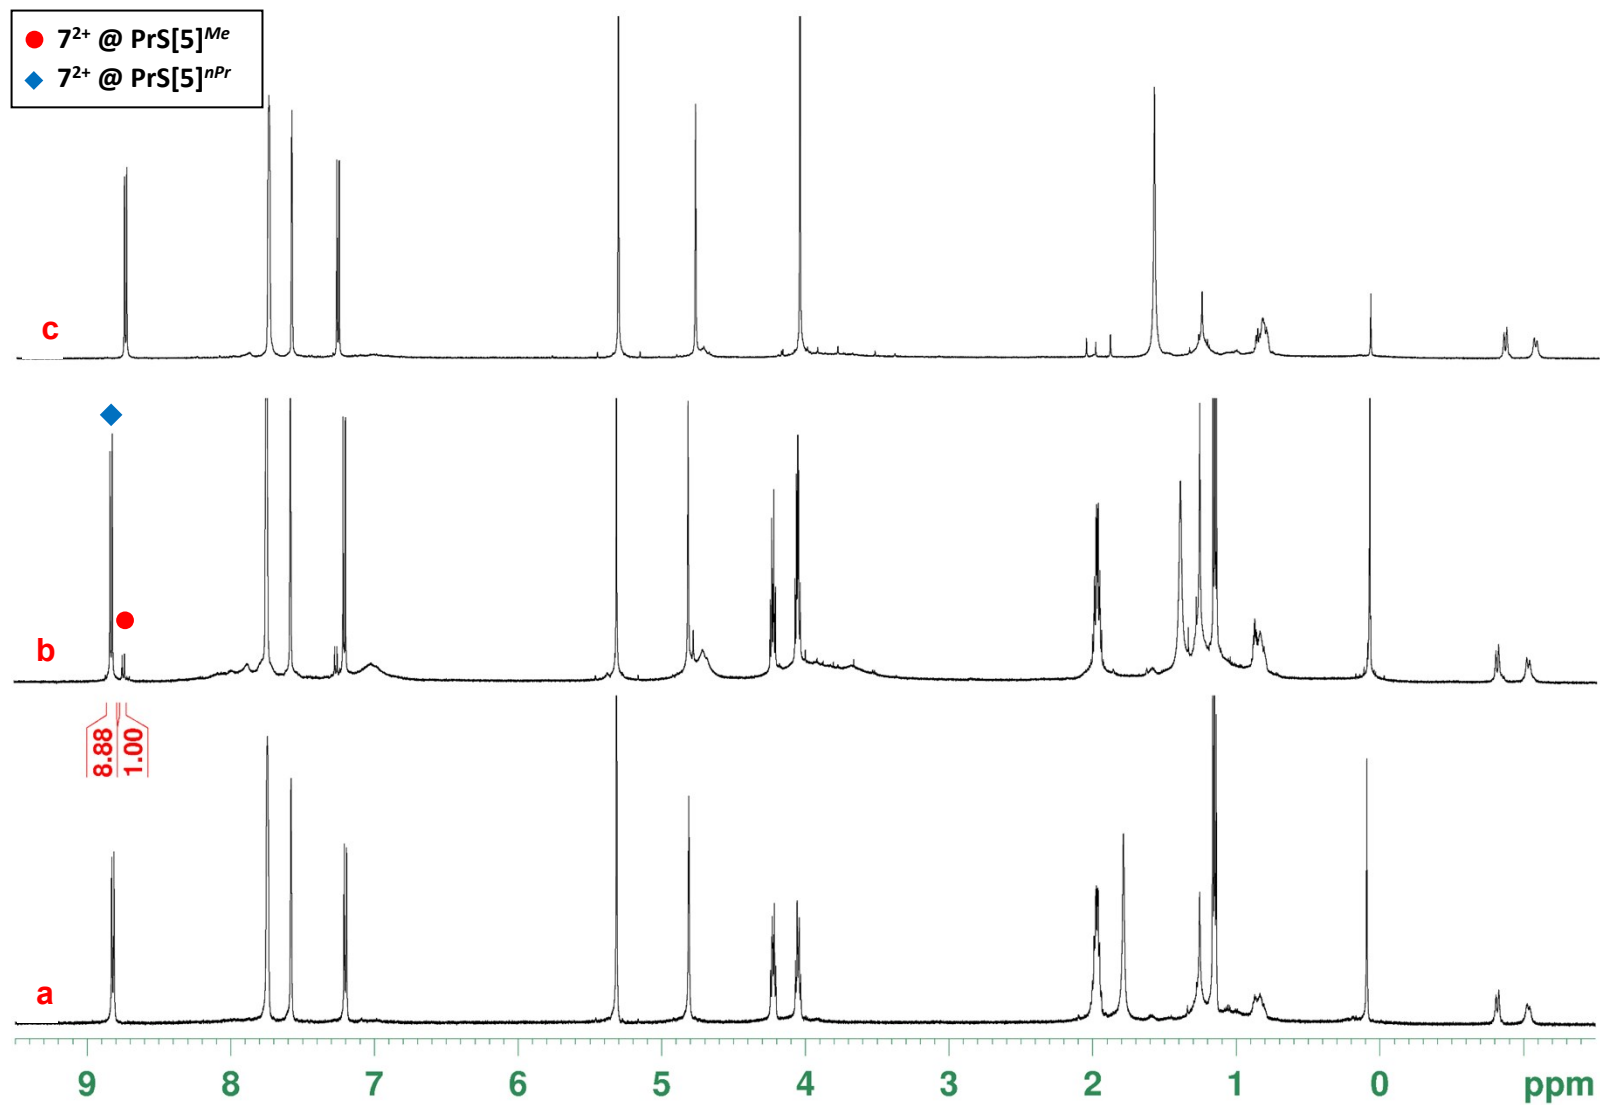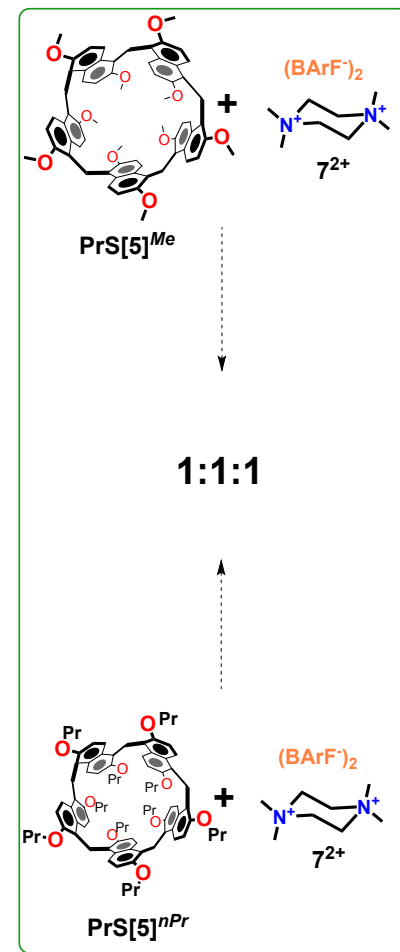

**Figure S64:**  $^1\text{H}$  NMR spectra (600 MHz,  $\text{CD}_2\text{Cl}_2$ , 298 K) of: (a) an equimolar solution (2.10 mM) of  $\text{PrS}[5]^{nPr}$  and  $7(\text{BarF})_2$  in 0.7 mL of  $\text{CD}_2\text{Cl}_2$ , (b) of  $\text{PrS}[5]^{Me}$  in the presence of 1 equivalent of  $\text{PrS}[5]^{nPr}$  and 1 equivalent of  $7(\text{BarF})_2$  and (c) an equimolar solution (2.10 mM) of  $\text{PrS}[5]^{Me}$  and  $7(\text{BarF})_2$  in 0.7 mL of  $\text{CD}_2\text{Cl}_2$ .

$$\text{Method B: } K_{\text{rel}} = K(7^{2+}@\text{PrS}[5]^{nPr}) / K(7^{2+}@\text{PrS}[5]^{Me}) = K(5^{2+}@\text{PrS}[5]^{nPr}) / 1.8 \times 10^7 = [(8.88/9.88) \times 0.0021]^2 / [(1.00/9.88) \times 0.0021]^2$$

$$K(7^{2+}@\text{PrS}[5]^{nPr}) = 79 \times 1.8 \cdot 10^7 = 1.4 \cdot 10^9 \text{ M}^{-1}$$

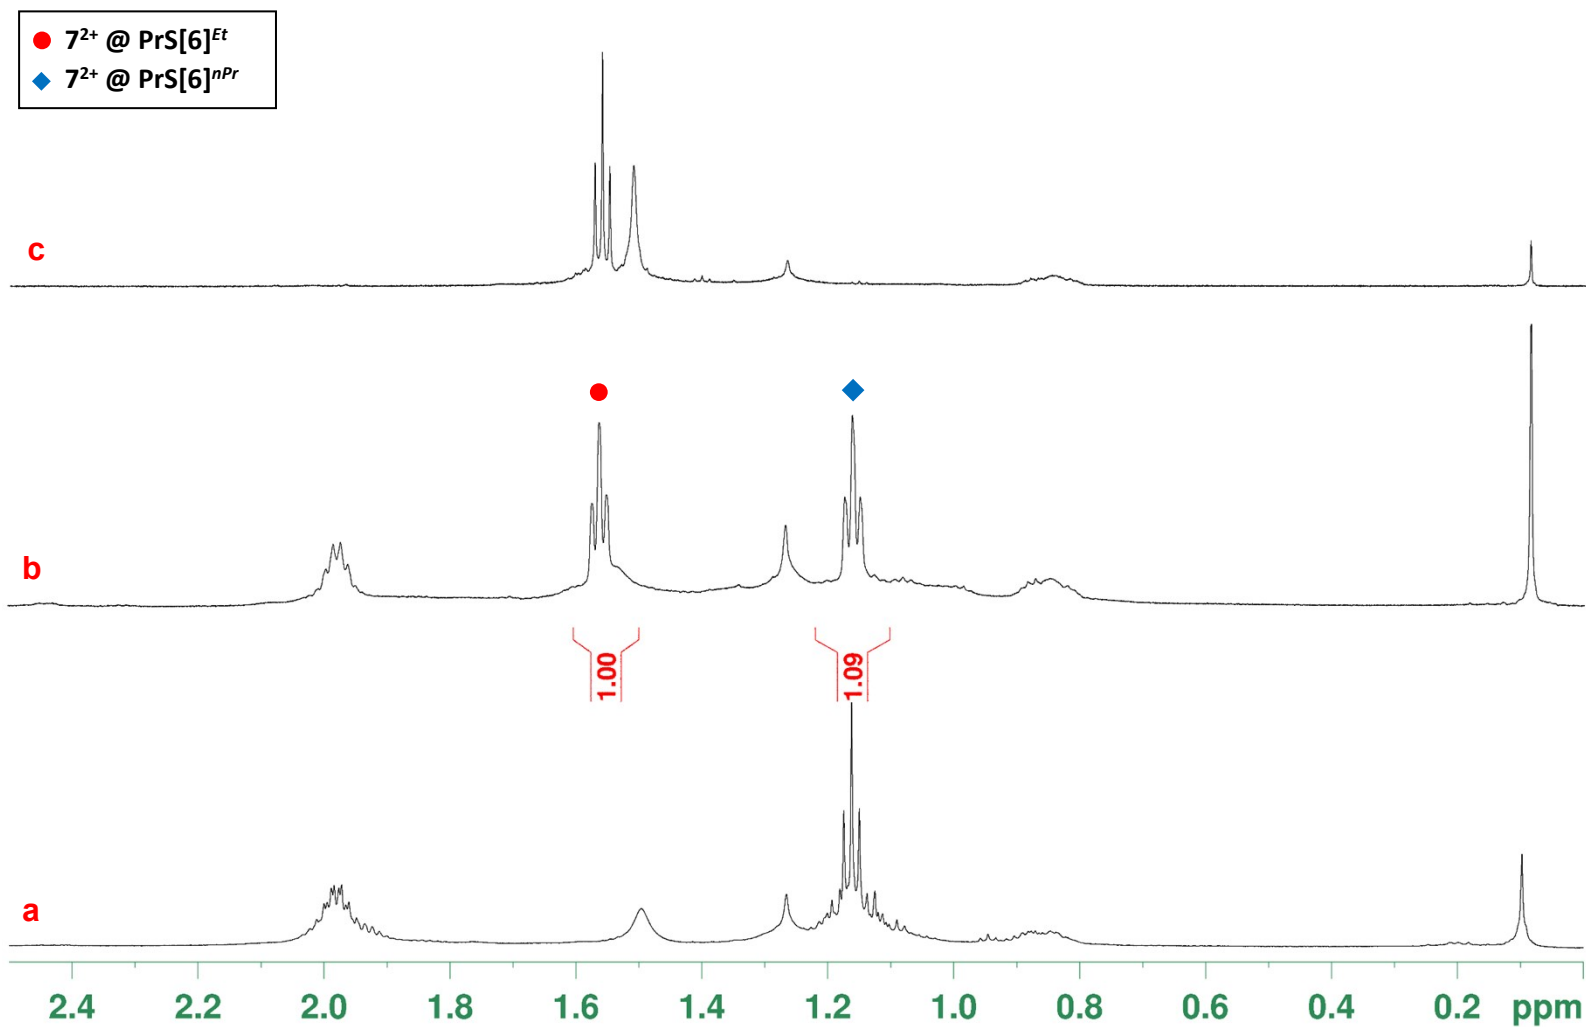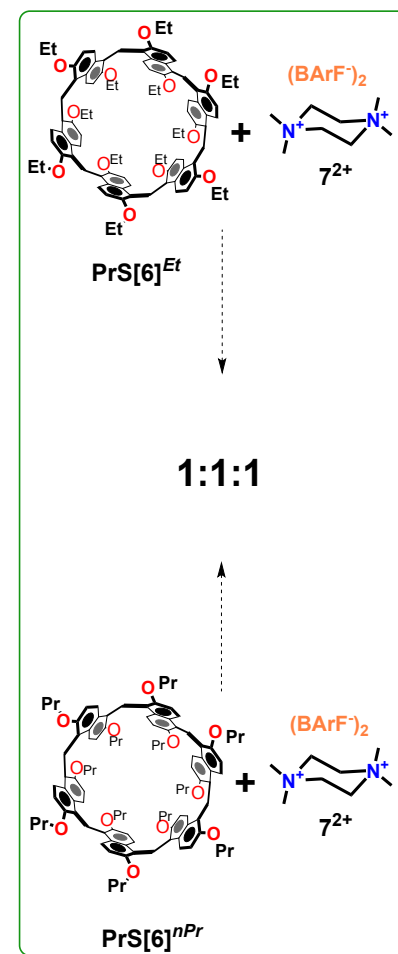

**Figure S65:** Significant portion of  $^1\text{H}$  NMR spectra (600 MHz,  $\text{CD}_2\text{Cl}_2$ , 298 K) of: (a) an equimolar solution (2.40 mM) of  $\text{PrS}[6]^{nPr}$  and  $7(\text{BArF})_2$  in 0.7 mL of  $\text{CD}_2\text{Cl}_2$ , (b) of  $\text{PrS}[6]^{Et}$  in the presence of 1 equivalent of  $\text{PrS}[6]^{nPr}$  and 1 equivalent of  $7(\text{BArF})_2$  and (c) an equimolar solution (2.40 mM) of  $\text{PrS}[6]^{Et}$  and  $7(\text{BArF})_2$  in 0.7 mL of  $\text{CD}_2\text{Cl}_2$ .

$$\text{Method B: } K_{\text{rel}} = K(7^{2+}@\text{PrS}[6]^{nPr}) / K(7^{2+}@\text{PrS}[6]^{Et}) = K(7^{2+}@\text{PrS}[6]^{nPr}) / 1.0 \times 10^8 = [(1.09/2.09) \times 0.0024]^2 / [(1.00/2.09) \times 0.0024]^2$$

$$K(7^{2+}@\text{PrS}[6]^{nPr}) = 79 \times 1.0 \cdot 10^8 = 1.2 \cdot 10^8 \text{ M}^{-1}$$



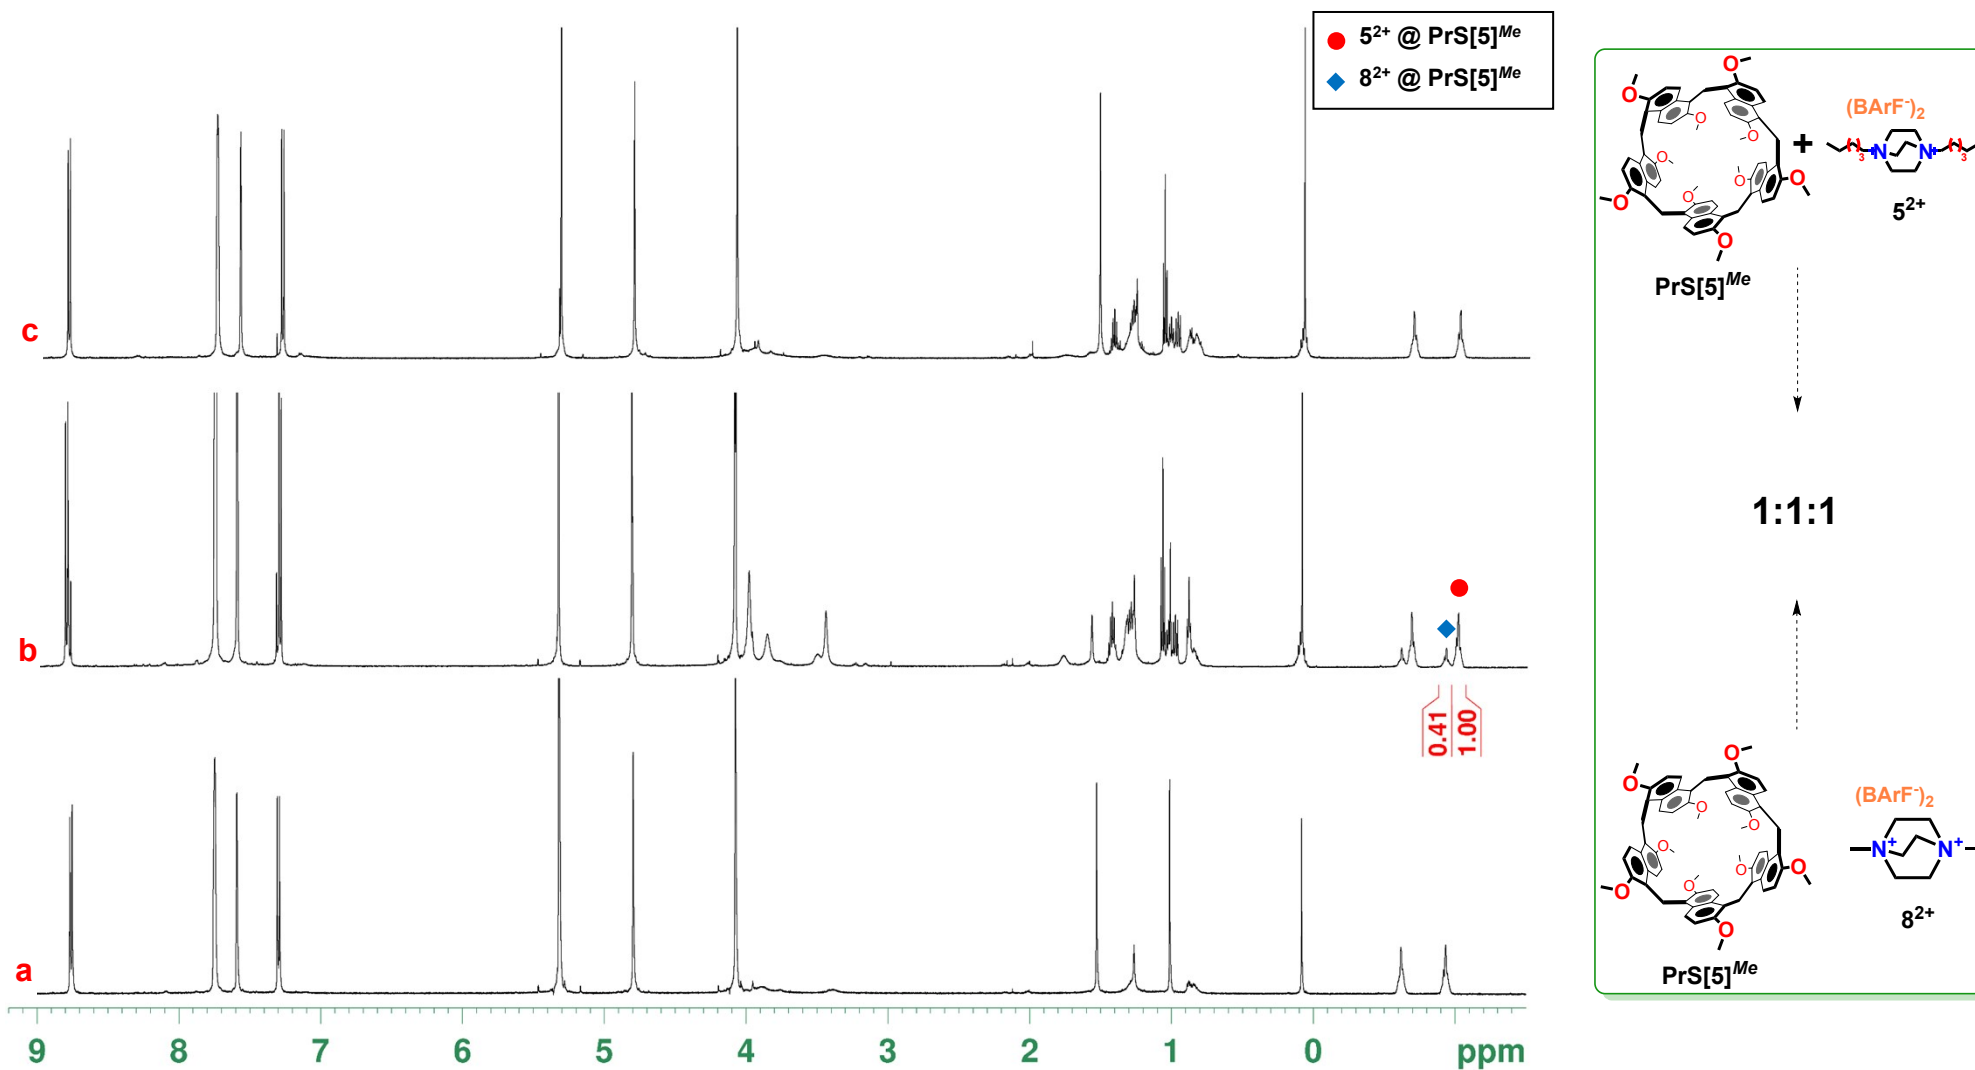

**Figure S66:**  $^1\text{H}$  NMR spectra (600 MHz,  $\text{CD}_2\text{Cl}_2$ , 298 K) of: (a) an equimolar solution (2.85 mM) of  $\text{PrS}[5]^{\text{Me}}$  and  $8(\text{BArF})_2$  in 0.7 mL of  $\text{CD}_2\text{Cl}_2$ , (b) of  $\text{PrS}[5]^{\text{Me}}$  in the presence of 1 equivalent of  $8(\text{BArF})_2$  and 1 equivalent of  $5(\text{BArF})_2$  and (c) an equimolar solution (2.85 mM) of  $\text{PrS}[5]^{\text{Me}}$  and  $5(\text{BArF})_2$  in 0.7 mL of  $\text{CD}_2\text{Cl}_2$ .

$$\text{Method B: } K_{\text{rel}} = K(8^{2+}@\text{PrS}[5]^{\text{Me}}) / K(5^{2+}@\text{PrS}[5]^{\text{Me}}) = K(8^{2+}@\text{PrS}[5]^{\text{Me}}) / 3.9 \times 10^7 = [(0.41/1.41) \times 0.0028]^2 / [(1.00/1.41) \times 0.0028]^2$$

$$K(8^{2+}@\text{PrS}[5]^{\text{Me}}) = 0.17 \times 3.9 \times 10^7 = 6.6 \cdot 10^6 \text{ M}^{-1}$$

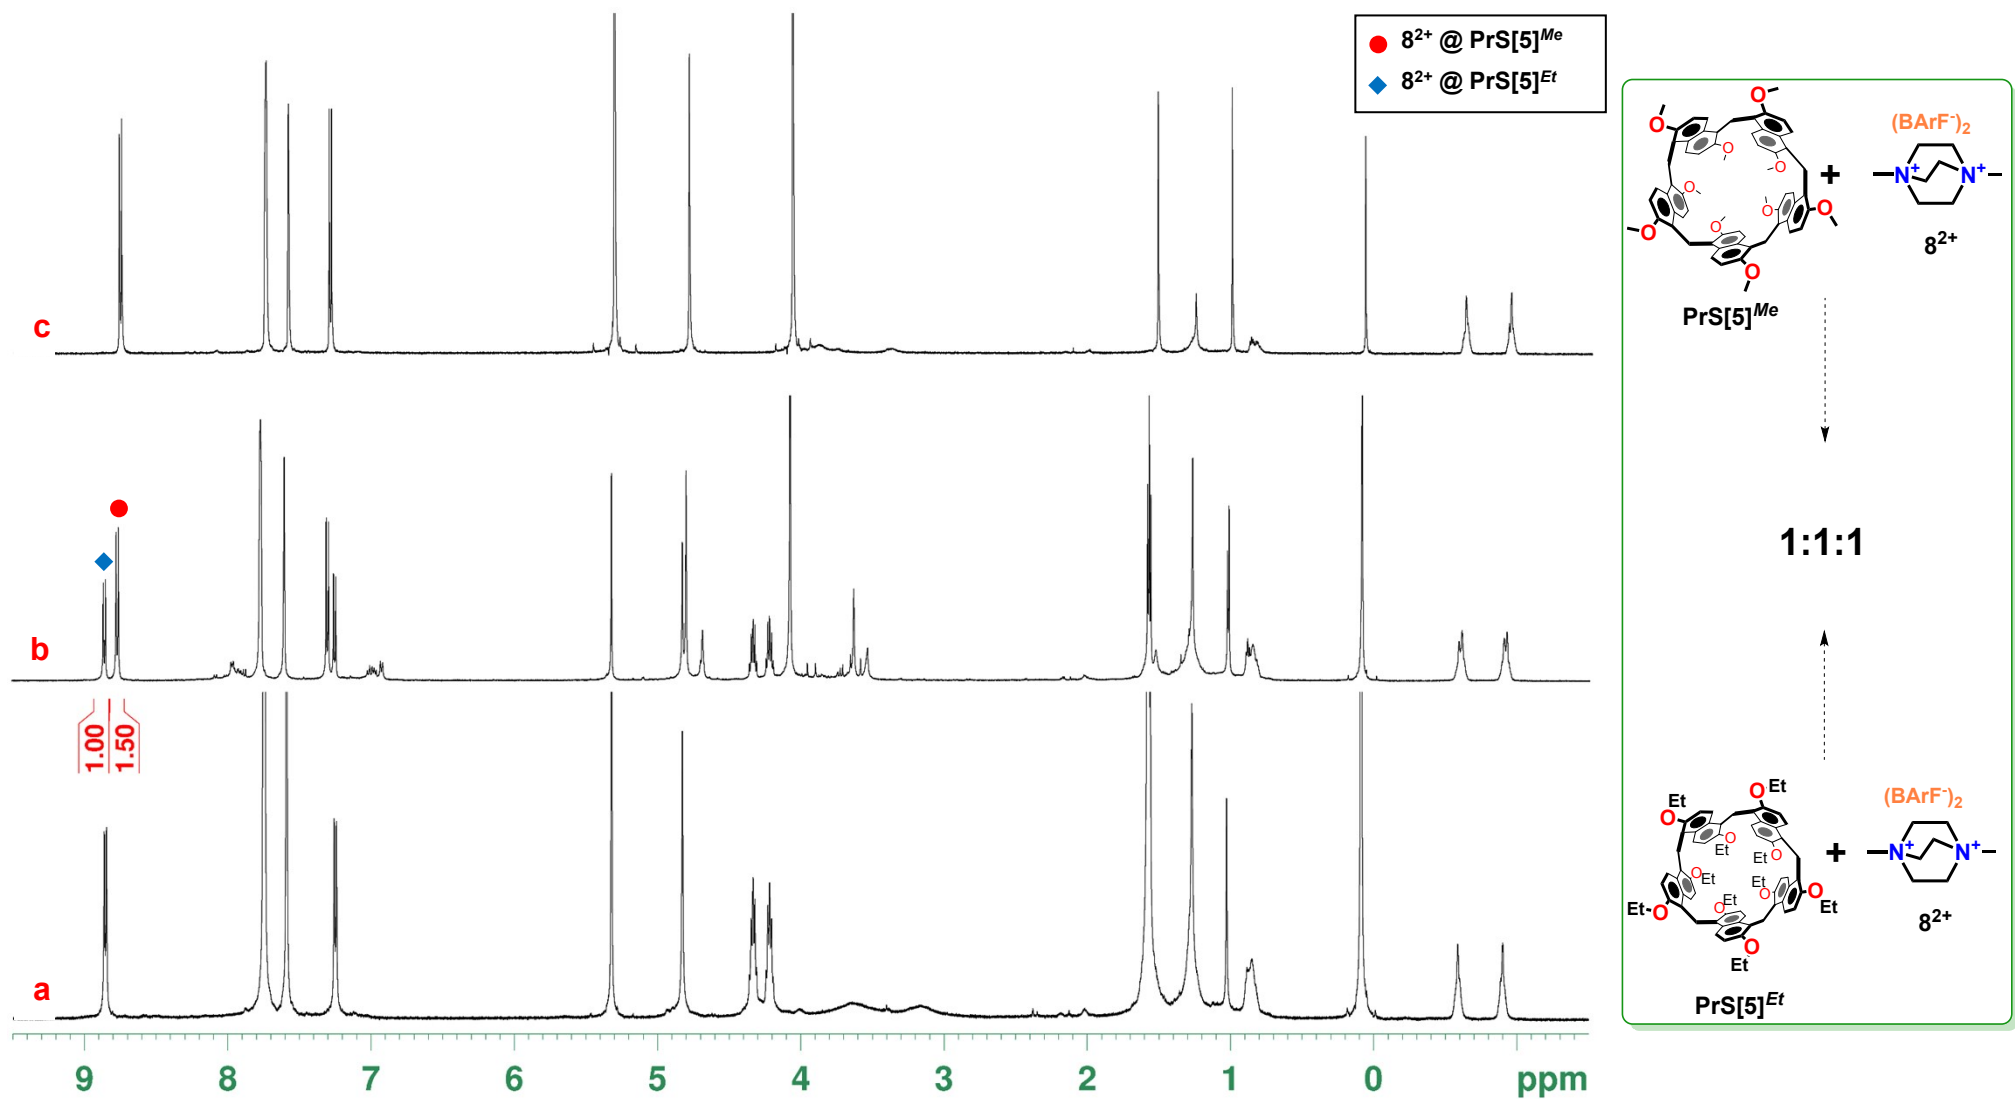

**Figure S67:**  $^1\text{H}$  NMR spectra (600 MHz,  $\text{CD}_2\text{Cl}_2$ , 298 K) of: (a) an equimolar solution (7.25 mM) of  $\text{PrS}[5]^{\text{Et}}$  and  $8(\text{BARF})_2$  in 0.7 mL of  $\text{CD}_2\text{Cl}_2$ , (b) of  $\text{PrS}[5]^{\text{Me}}$  in the presence of 1 equivalent of  $\text{PrS}[5]^{\text{Et}}$  and 1 equivalent of  $8(\text{BARF})_2$  and (c) an equimolar solution (7.25 mM) of  $\text{PrS}[5]^{\text{Me}}$  and  $8(\text{BARF})_2$  in 0.7 mL of  $\text{CD}_2\text{Cl}_2$ .

$$\text{Method B: } K_{\text{rel}} = K(8^{2+} @ \text{PrS}[5]^{\text{Et}}) / K(8^{2+} @ \text{PrS}[5]^{\text{Me}}) = K(8^{2+} @ \text{PrS}[5]^{\text{Et}}) / 6.6 \times 10^6 = [(1.00/2.50) \times 0.0072]^2 / [(1.50/2.50) \times 0.0072]^2$$

$$K(8^{2+} @ \text{PrS}[5]^{\text{Et}}) = 0.45 \times 6.6 \times 10^6 = 2.9 \cdot 10^6 \text{ M}^{-1}$$

$K(9^{2+}@PrS[5]^{Me}) = 5780 \text{ M}^{-1}$  (by integration, see Figure S68)

Competition experiment:  $9^{2+} + PrS[5]^{Me} + PrS[5]^{Et} = 9^{2+}@PrS[5]^{Me} + 9^{2+}@PrS[5]^{Et} \rightarrow K(9^{2+}@PrS[5]^{Et}) = 1.0 \cdot 10^5 \text{ M}^{-1}$  (figure S69)

Competition experiment:  $9^{2+} + PrS[6]^{Me} + PrS[5]^{Et} = 9^{2+}@PrS[6]^{Me} + 9^{2+}@PrS[5]^{Et} \rightarrow K(9^{2+}@PrS[6]^{Me}) = 3.7 \cdot 10^3 \text{ M}^{-1}$  (figure S70)

Competition experiment:  $9^{2+} + PrS[6]^{Me} + 8^{2+} = 9^{2+}@PrS[6]^{Me} + 8^{2+}@PrS[6]^{Me} \rightarrow K(8^{2+}@PrS[6]^{Me}) = 4.2 \cdot 10^3 \text{ M}^{-1}$  (figure S71)

Competition experiment:  $9^{2+} + PrS[5]^{Me} + PrS[5]^{nPr} = 9^{2+}@PrS[5]^{Me} + 9^{2+}@PrS[5]^{nPr} \rightarrow K(9^{2+}@PrS[5]^{nPr}) = 4.8 \cdot 10^5 \text{ M}^{-1}$  (figure S72)

Competition experiment:  $8^{2+} + PrS[5]^{Me} + PrS[5]^{nPr} = 8^{2+}@PrS[5]^{Me}$  (Figure S59) +  $8^{2+}@PrS[5]^{nPr} \rightarrow K(8^{2+}@PrS[5]^{nPr}) = 6.3 \cdot 10^7 \text{ M}^{-1}$  (figure S73)

Competition experiment:  $8^{2+} + PrS[6]^{Me} + PrS[6]^{Et} = 8^{2+}@PrS[6]^{Me} + 8^{2+}@PrS[6]^{Et} \rightarrow K(8^{2+}@PrS[6]^{Et}) = 420 \text{ M}^{-1}$  (figure S74)

Competition experiment:  $8^{2+} + PrS[6]^{Me} + PrS[6]^{nPr} = 8^{2+}@PrS[6]^{Me} + 8^{2+}@PrS[6]^{nPr} \rightarrow K(8^{2+}@PrS[6]^{nPr}) = 370 \text{ M}^{-1}$  (figure S75)

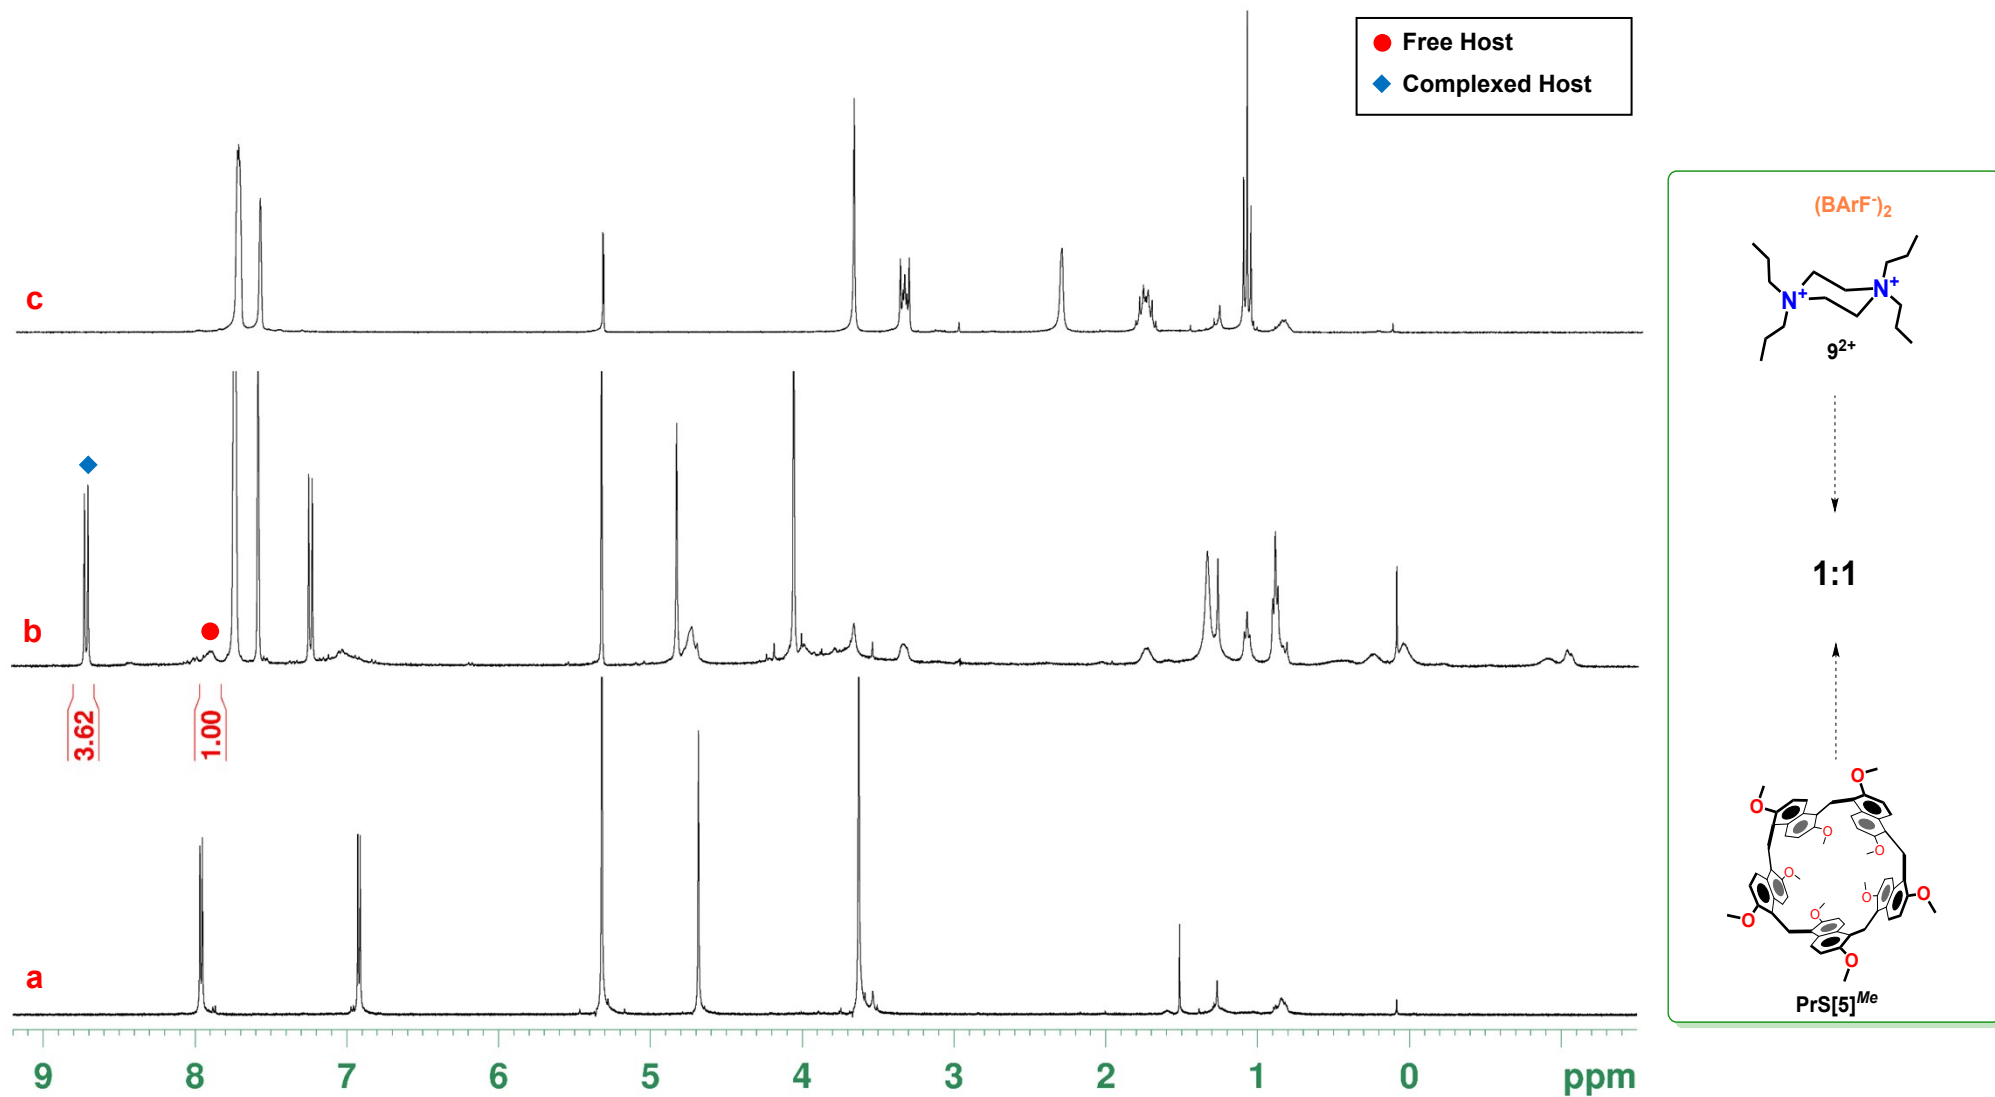

**Figure S68:**  $^1\text{H}$  NMR spectra (400 MHz,  $\text{CD}_2\text{Cl}_2$ , 298 K) of: (a) a solution of  $\text{PrS}[5]^{\text{Me}}$  (b) an equimolar solution (2.85 mM) of  $\text{PrS}[5]^{\text{Me}}$  and  $9(\text{BArF})_2$  in 0.7 mL of  $\text{CD}_2\text{Cl}_2$  and (c) a solution of  $9(\text{BArF})_2$ .

**Method A:**  $[\text{9}^{2+}@\text{PrS}[5]^{\text{Me}}] = [(3.62/4.62) \times 0.0028] = 0.0022$ ;  $[\text{PrS}[6]^{n\text{Pr}}]_{\text{free}} = [\text{9}^{2+}]_{\text{free}} = 0.0006$ ;  $K (6^+@\text{PrS}[6]^{\text{Et}}) = 0.0022/3.8 \cdot 10^{-7} = 5780 \text{ M}^{-1}$

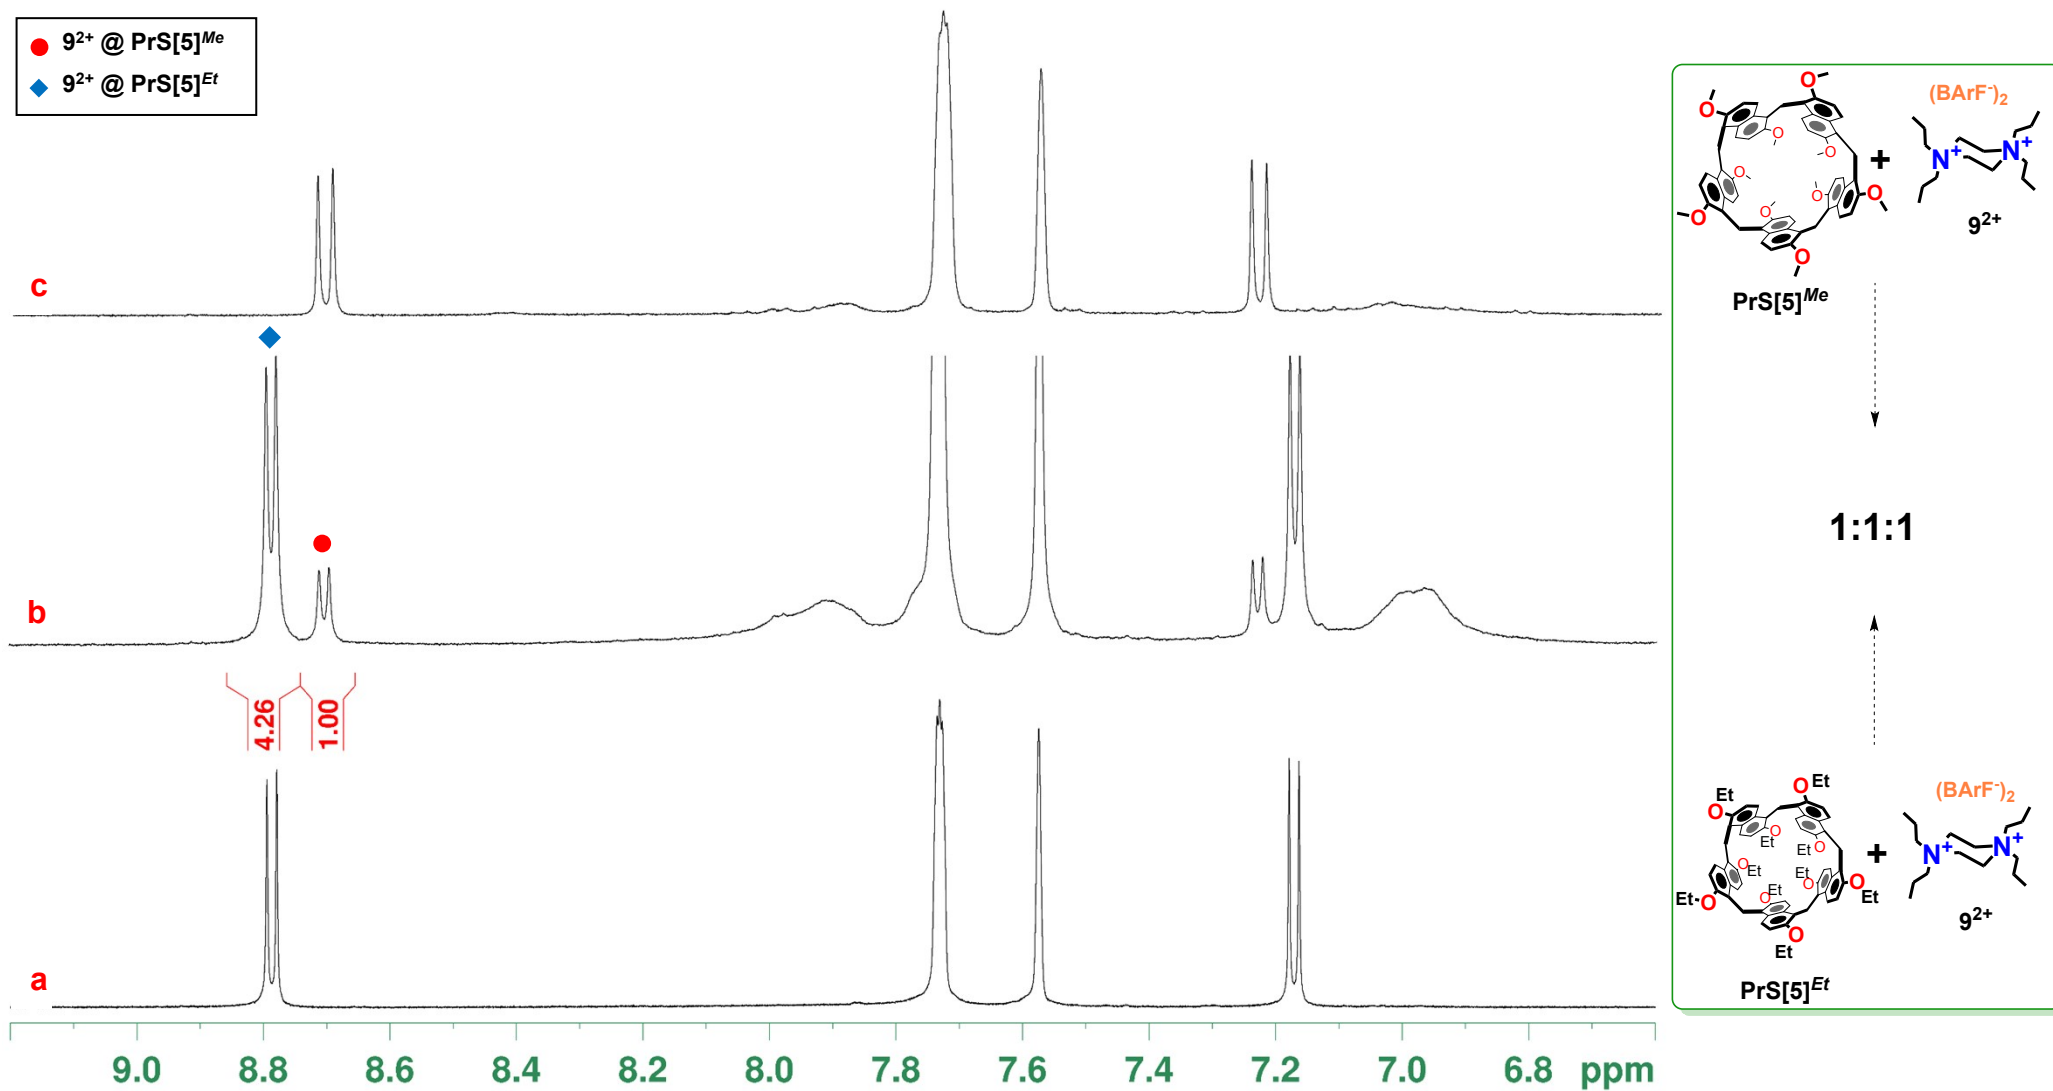

**Figure S69:** Significant portion of  $^1\text{H}$  NMR spectra (600 MHz,  $\text{CD}_2\text{Cl}_2$ , 298 K) of: (a) an equimolar solution (2.50 mM) of  $\text{PrS}[5]^{Et}$  and  $9(\text{BArF})_2$  in 0.7 mL of  $\text{CD}_2\text{Cl}_2$ , (b) of  $\text{PrS}[5]^{Me}$  in the presence of 1 equivalent of  $\text{PrS}[5]^{Et}$  and 1 equivalent of  $9(\text{BArF})_2$  and (c) an equimolar solution (2.50 mM) of  $\text{PrS}[5]^{Me}$  and  $9(\text{BArF})_2$  in 0.7 mL of  $\text{CD}_2\text{Cl}_2$ .

$$\text{Method B: } K_{\text{rel}} = K(9^{2+} @ \text{PrS}[5]^{Et}) / K(9^{2+} @ \text{PrS}[5]^{Me}) = K(9^{2+} @ \text{PrS}[5]^{Et}) / 5780 = [(4.26/5.26) \times 0.0025]^2 / [(1.00/5.26) \times 0.0025]^2$$

$$K(9^{2+} @ \text{PrS}[5]^{Et}) = 18 \times 5780 = 1.0 \cdot 10^5 \text{ M}^{-1}$$

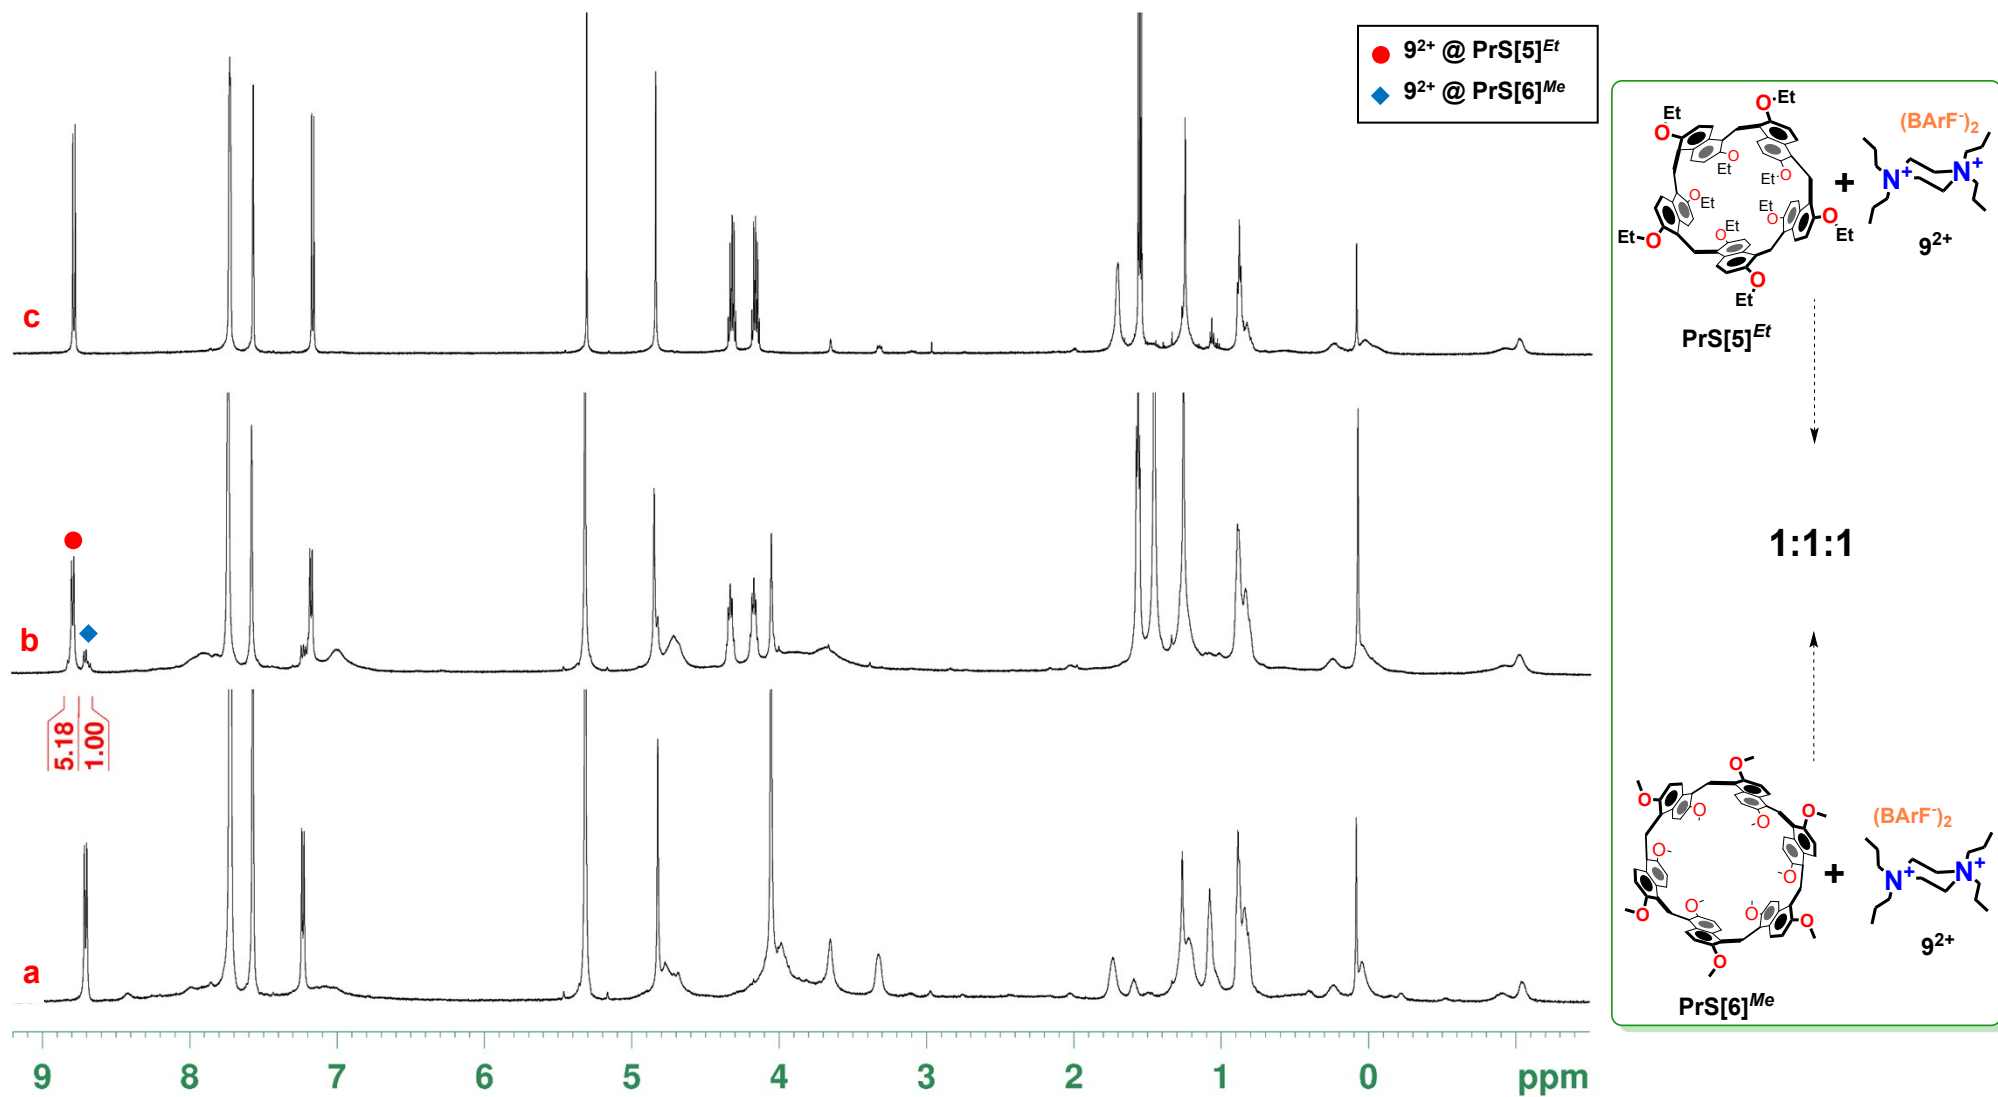

**Figure S70:**  $^1\text{H}$  NMR spectra (600 MHz,  $\text{CD}_2\text{Cl}_2$ , 298 K) of: (a) an equimolar solution (2.38 mM) of  $\text{PrS}[6]^{\text{Me}}$  and  $9(\text{BArF})_2$  in 0.7 mL of  $\text{CD}_2\text{Cl}_2$ , (b) of  $\text{PrS}[5]^{\text{Et}}$  in the presence of 1 equivalent of  $\text{PrS}[6]^{\text{Me}}$  and 1 equivalent of  $9(\text{BArF})_2$  and (c) an equimolar solution (2.38 mM) of  $\text{PrS}[5]^{\text{Et}}$  and  $9(\text{BArF})_2$  in 0.7 mL of  $\text{CD}_2\text{Cl}_2$ .

$$\text{Method B: } K_{\text{rel}} = K(9^{2+}@\text{PrS}[6]^{\text{Me}}) / K(9^{2+}@\text{PrS}[5]^{\text{Et}}) = K(9^{2+}@\text{PrS}[6]^{\text{Me}}) / 1.0 \cdot 10^5 = [(1.00/6.18) \times 0.0024]^2 / [(5.18/6.18) \times 0.0024]^2$$

$$K(9^{2+}@\text{PrS}[6]^{\text{Me}}) = 0.04 \times 1.0 \cdot 10^5 = 3700 \text{ M}^{-1}$$

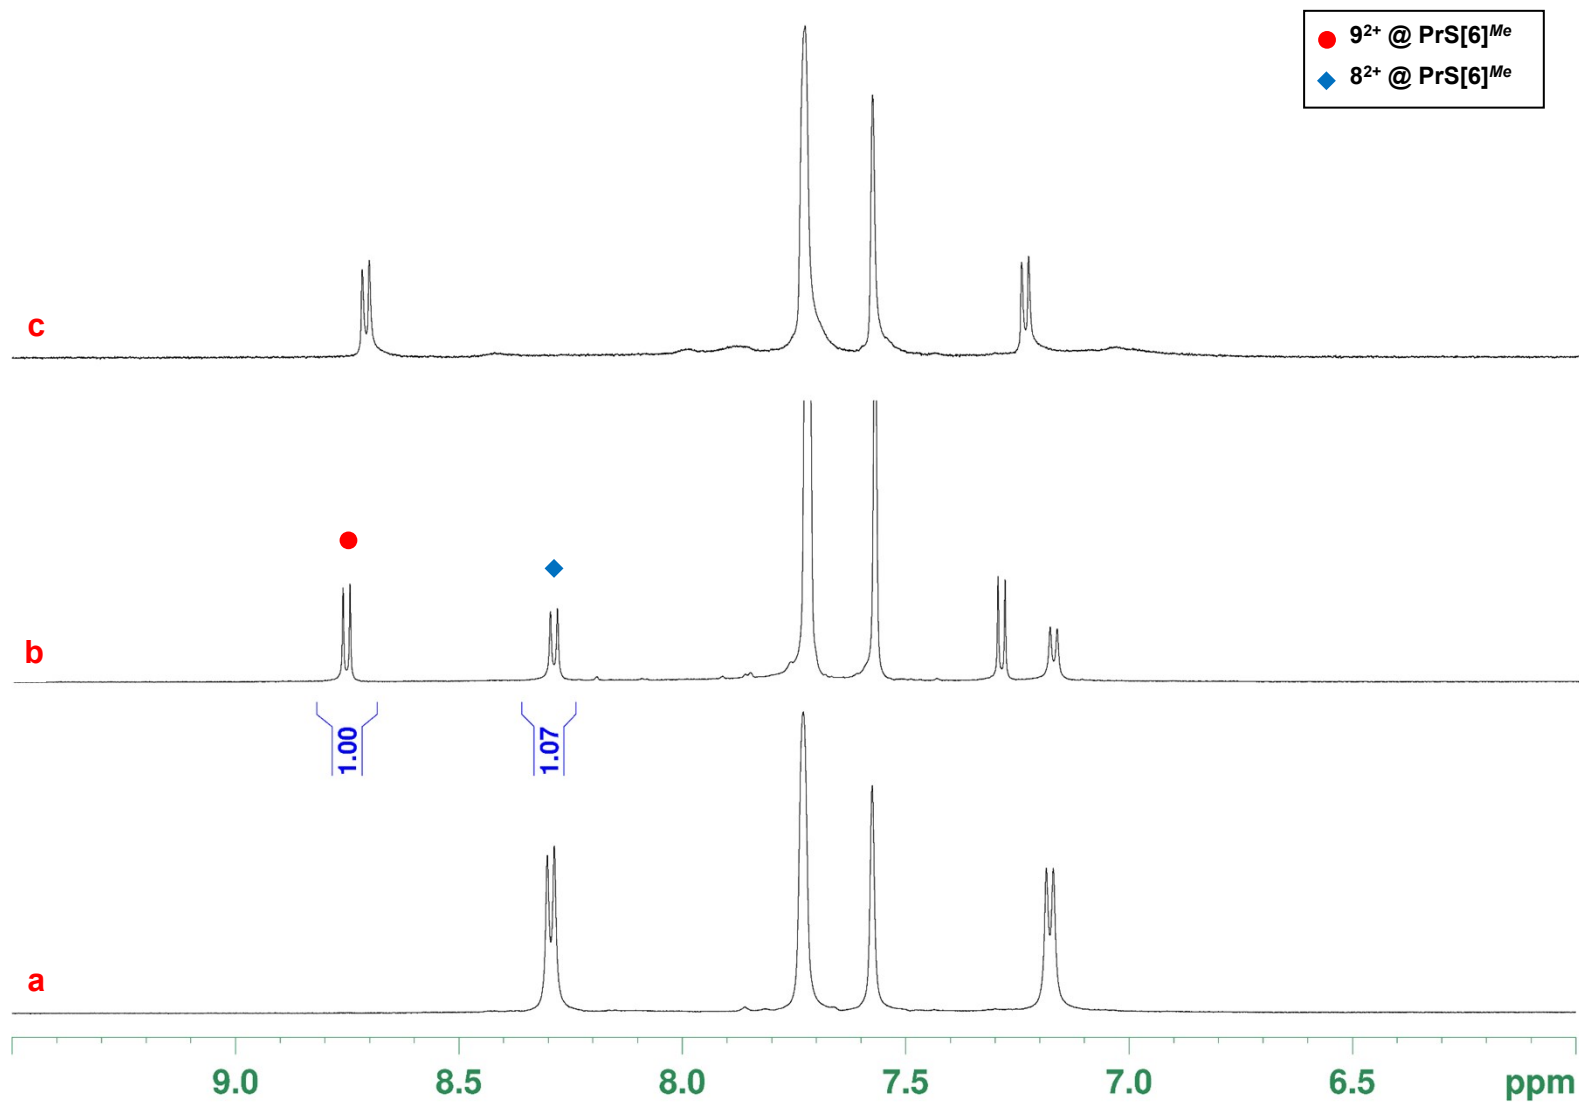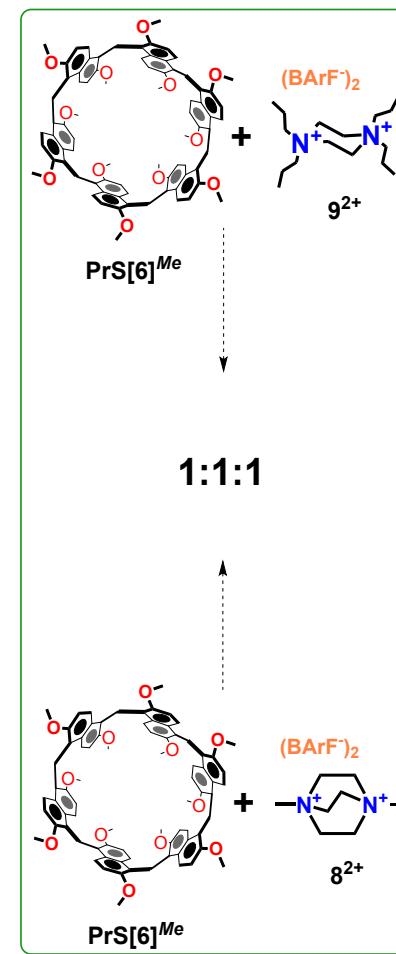

**Figure S71:** <sup>1</sup>H NMR spectra (600 MHz, CD<sub>2</sub>Cl<sub>2</sub>, 298 K) of: (a) an equimolar solution (2.38 mM) of PrS[6]<sup>Me</sup> and 8(BArF)<sub>2</sub> in 0.7 mL of CD<sub>2</sub>Cl<sub>2</sub>, (b) of PrS[6]<sup>Me</sup> in the presence of 1 equivalent of 8(BArF)<sub>2</sub> and 1 equivalent of 9(BArF)<sub>2</sub> and (c) an equimolar solution (2.38 mM) of PrS[6]<sup>Me</sup> and 9(BArF)<sub>2</sub> in 0.7 mL of CD<sub>2</sub>Cl<sub>2</sub>.

$$\text{Method B: } K_{\text{rel}} = K(8^{2+}@\text{PrS}[6]^{Me}) / K(9^{2+}@\text{PrS}[6]^{Me}) = K(8^{2+}@\text{PrS}[6]^{Me}) / 3700 = [(1.07/2.07) \times 0.0024]^2 / [(1.00/2.07) \times 0.0024]^2$$

$$K(8^{2+}@\text{PrS}[6]^{Me}) = 1.14 \times 3700 = 4200 \text{ M}^{-1}$$

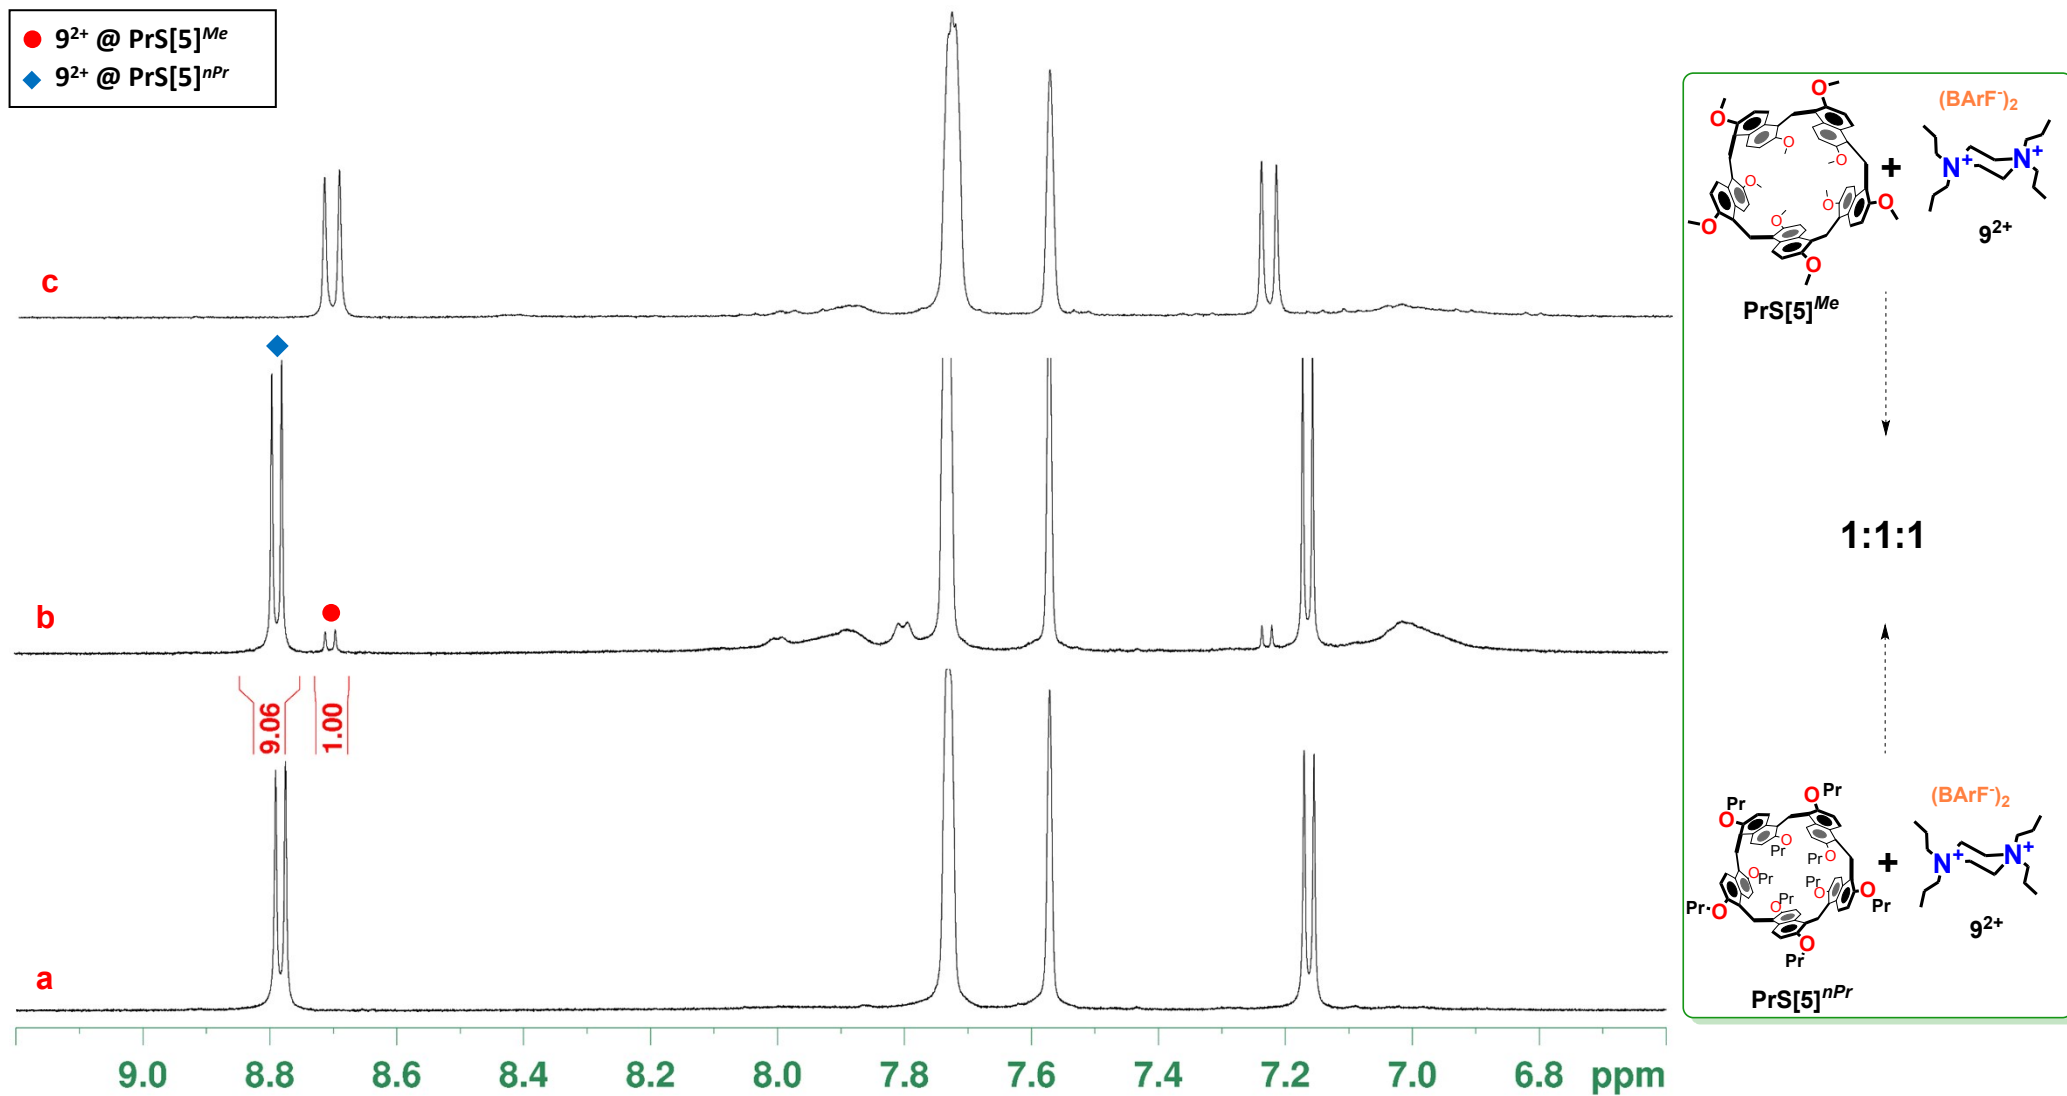

**Figure S72:** Significant portion of <sup>1</sup>H NMR spectra (600 MHz, CD<sub>2</sub>Cl<sub>2</sub>, 298 K) of: (a) an equimolar solution (3.12 mM) of **PrS[5]<sup>nPr</sup>** and **9(BArF)<sub>2</sub>** in 0.7 mL of CD<sub>2</sub>Cl<sub>2</sub>, (b) of **PrS[5]<sup>Me</sup>** in the presence of 1 equivalent of **PrS[5]<sup>nPr</sup>** and 1 equivalent of **9(BArF)<sub>2</sub>** and (c) an equimolar solution (3.12 mM) of **PrS[5]<sup>Me</sup>** and **9(BArF)<sub>2</sub>** in 0.7 mL of CD<sub>2</sub>Cl<sub>2</sub>.

$$\text{Method B: } K_{\text{rel}} = K(9^{2+} @ \text{PrS}[5]^{nPr}) / K(9^{2+} @ \text{PrS}[5]^{Me}) = K(9^{2+} @ \text{PrS}[5]^{nPr}) / 5780 = [(9.1/10.1) \times 0.0031]^2 / [(1.00/10.1) \times 0.0031]^2$$

$$K(9^{2+} @ \text{PrS}[5]^{nPr}) = 82 \times 5780 = 4.8 \cdot 10^5 \text{ M}^{-1}$$



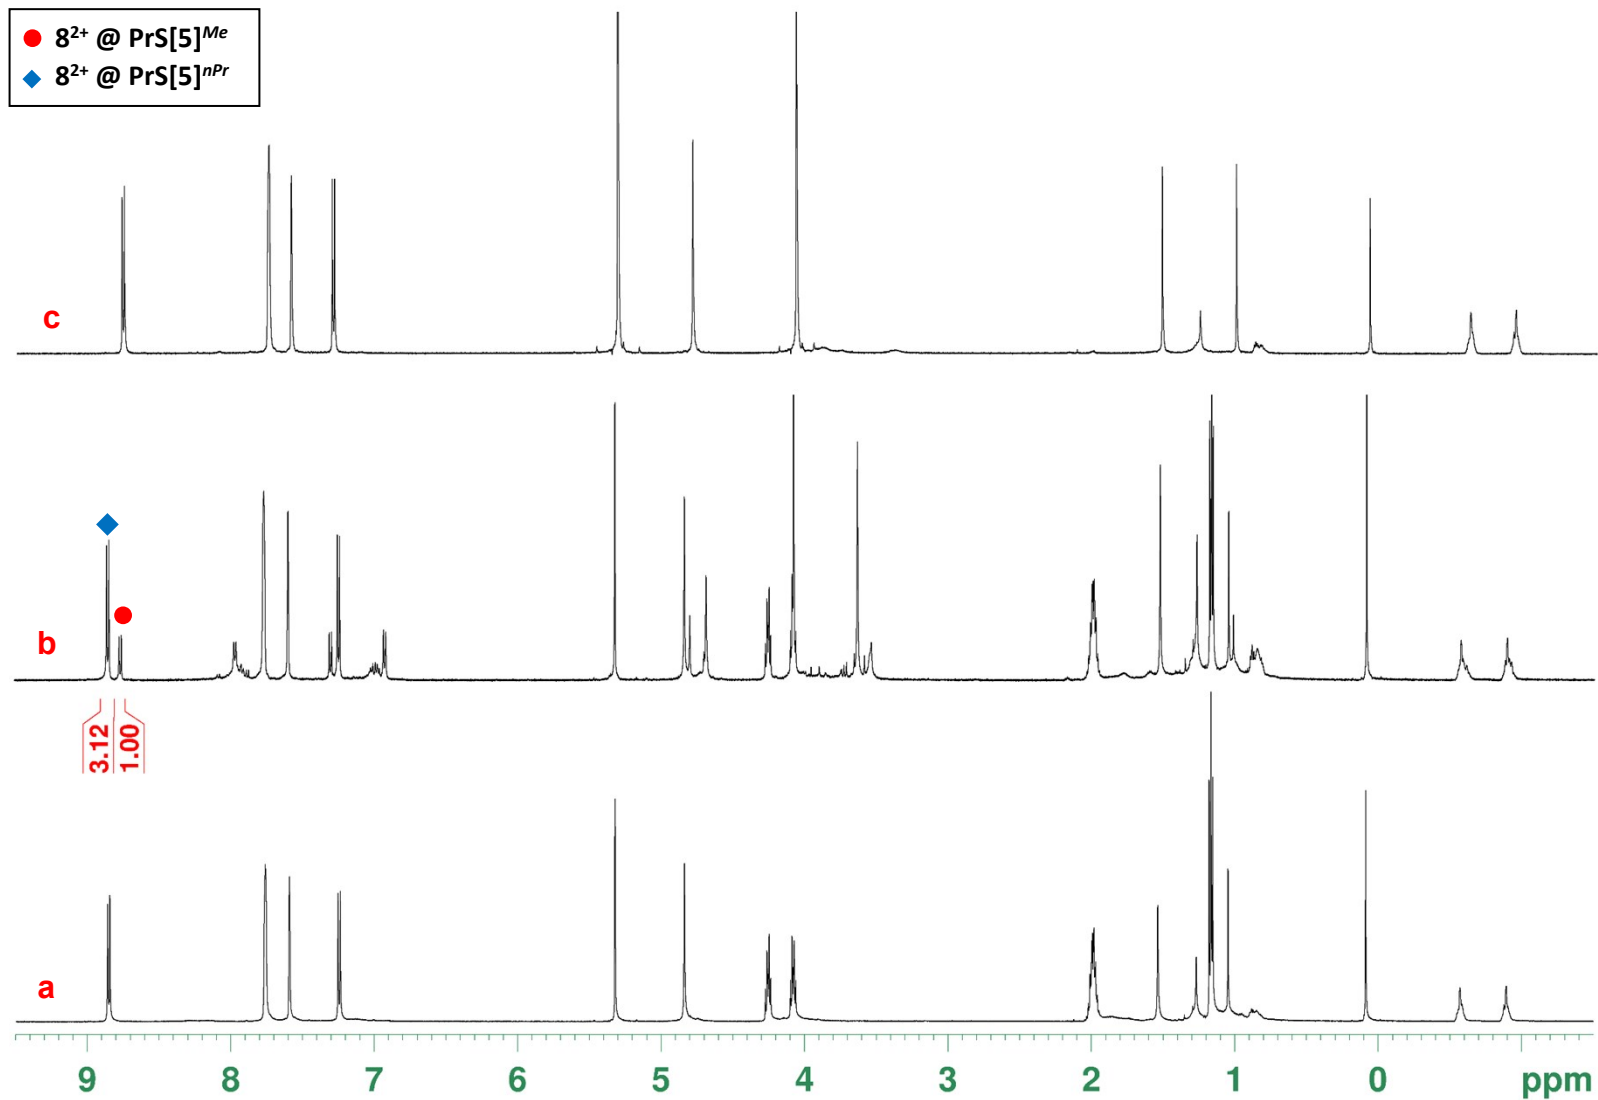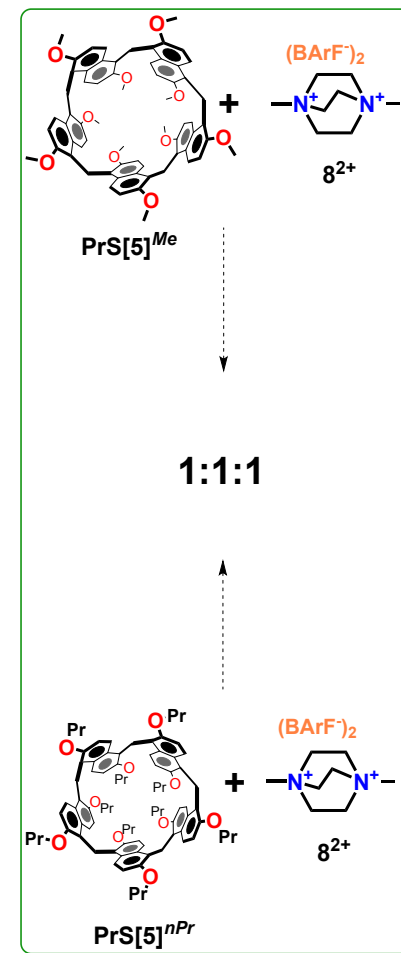

**Figure S73:**  $^1\text{H}$  NMR spectra (600 MHz,  $\text{CD}_2\text{Cl}_2$ , 298 K) of: (a) an equimolar solution (4.68 mM) of  $\text{PrS[5]}^{\text{nPr}}$  and  $8(\text{BARF})_2$  in 0.7 mL of  $\text{CD}_2\text{Cl}_2$ , (b) of  $\text{PrS[5]}^{\text{Me}}$  in the presence of 1 equivalent of  $\text{PrS[5]}^{\text{nPr}}$  and 1 equivalent of  $8(\text{BARF})_2$  and (c) an equimolar solution (4.68 mM) of  $\text{PrS[5]}^{\text{Me}}$  and  $8(\text{BARF})_2$  in 0.7 mL of  $\text{CD}_2\text{Cl}_2$ .

$$\text{Method B: } K_{\text{rel}} = K(8^{2+}@\text{PrS[5]}^{\text{nPr}}) / K(8^{2+}@\text{PrS[5]}^{\text{Me}}) = K(8^{2+}@\text{PrS[5]}^{\text{nPr}}) / 6.6 \cdot 10^6 = [(3.12/4.12) \times 0.0047]^2 / [(1.00/4.12) \times 0.0047]^2$$

$$K(8^{2+}@\text{PrS[5]}^{\text{nPr}}) = 9.6 \times 6.6 \cdot 10^6 = \mathbf{6.3 \cdot 10^7 \text{ M}^{-1}}$$

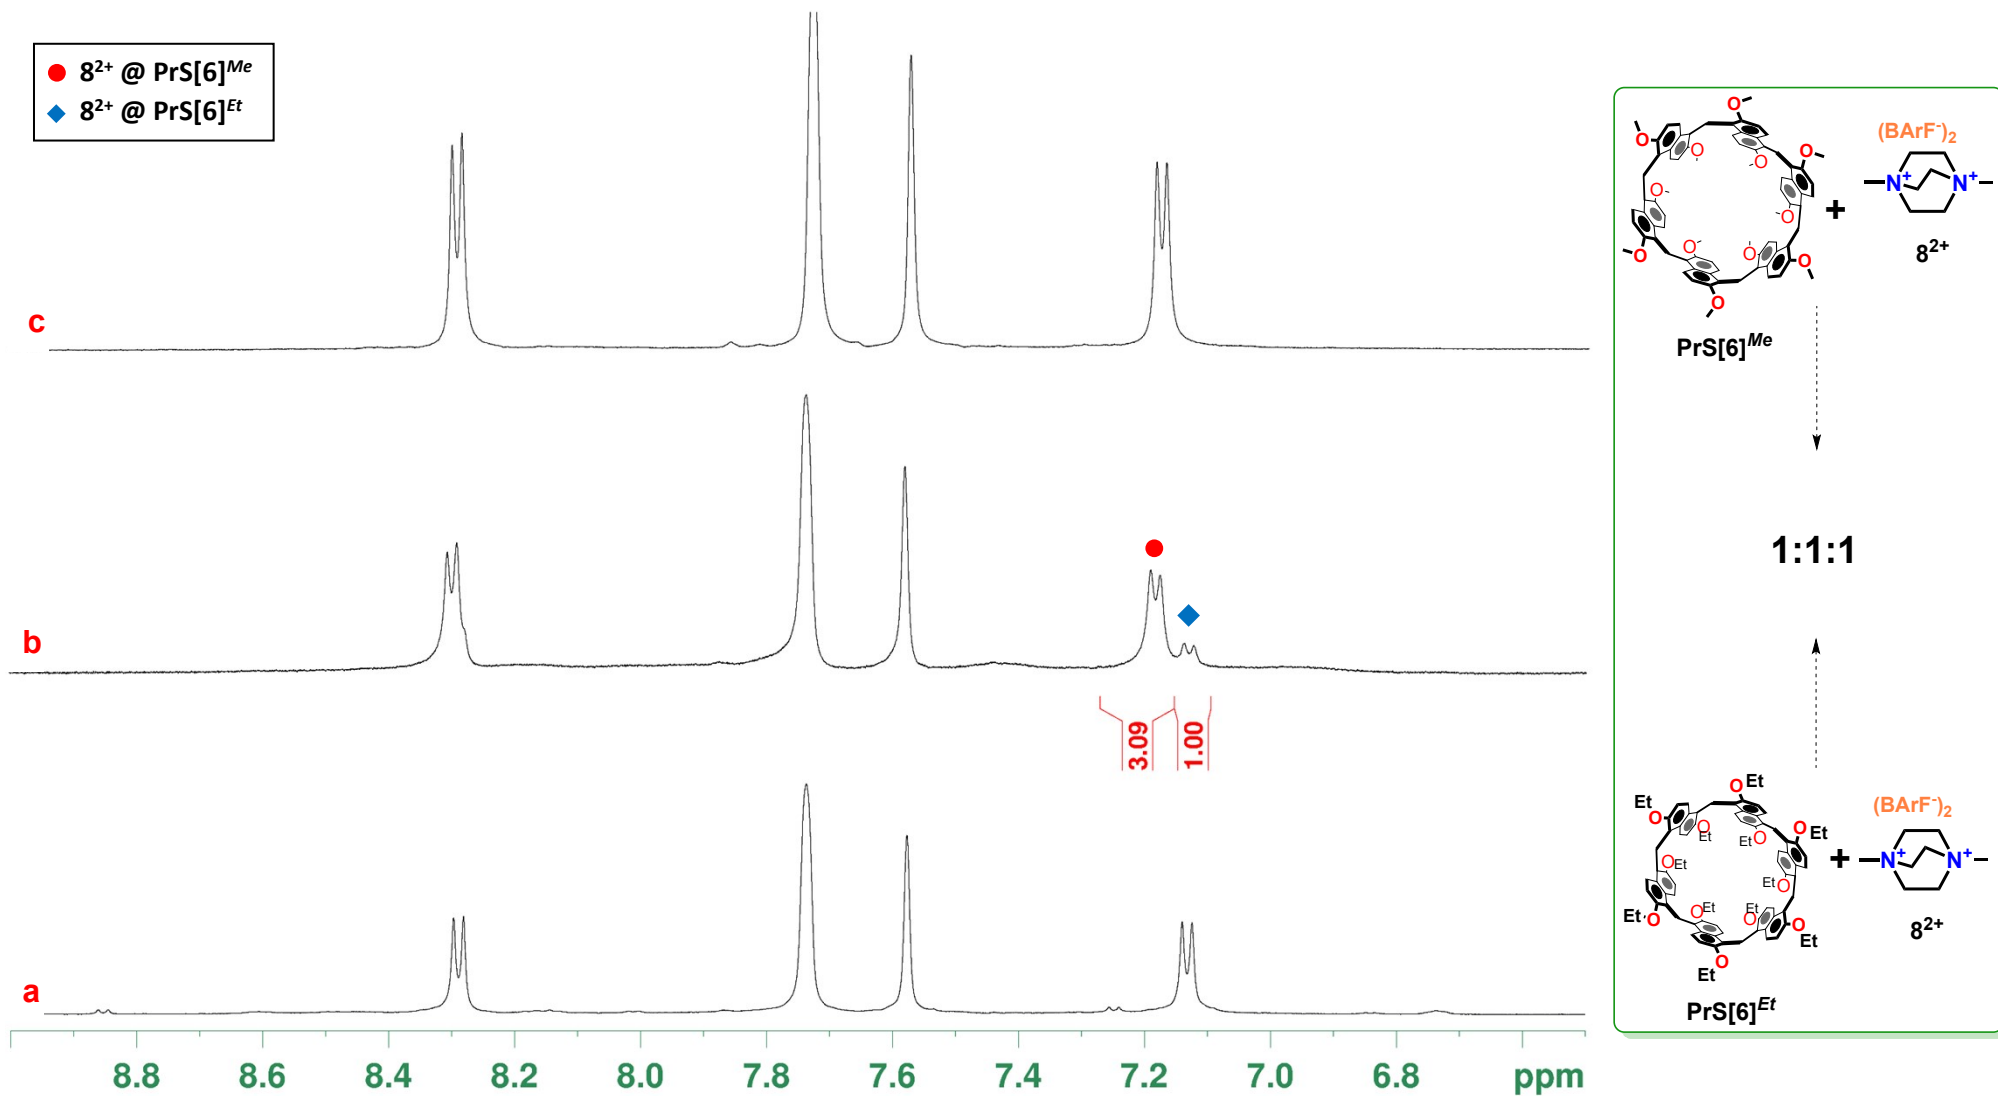

**Figure S74:** Significant portion of  $^1\text{H}$  NMR spectra (600 MHz,  $\text{CD}_2\text{Cl}_2$ , 298 K) of: (a) an equimolar solution (2.38 mM) of  $\text{PrS}[6]^{\text{Et}}$  and  $8(\text{BArF})_2$  in 0.7 mL of  $\text{CD}_2\text{Cl}_2$ , (b) of  $\text{PrS}[6]^{\text{Me}}$  in the presence of 1 equivalent of  $\text{PrS}[6]^{\text{Et}}$  and 1 equivalent of  $8(\text{BArF})_2$  and (c) an equimolar solution (2.38 mM) of  $\text{PrS}[6]^{\text{Me}}$  and  $8(\text{BArF})_2$  in 0.7 mL of  $\text{CD}_2\text{Cl}_2$ .

$$\text{Method B: } K_{\text{rel}} = K(8^{2+}@\text{PrS}[6]^{\text{Et}}) / K(8^{2+}@\text{PrS}[6]^{\text{Me}}) = K(8^{2+}@\text{PrS}[6]^{\text{Et}}) / 4.2 \cdot 10^3 = [(1.00/4.10) \times 0.0024]^2 / [(3.10/4.10) \times 0.0024]^2$$

$$K(8^{2+}@\text{PrS}[6]^{\text{Et}}) = 0.1 \times 4.2 \cdot 10^3 = 420 \text{ M}^{-1}$$

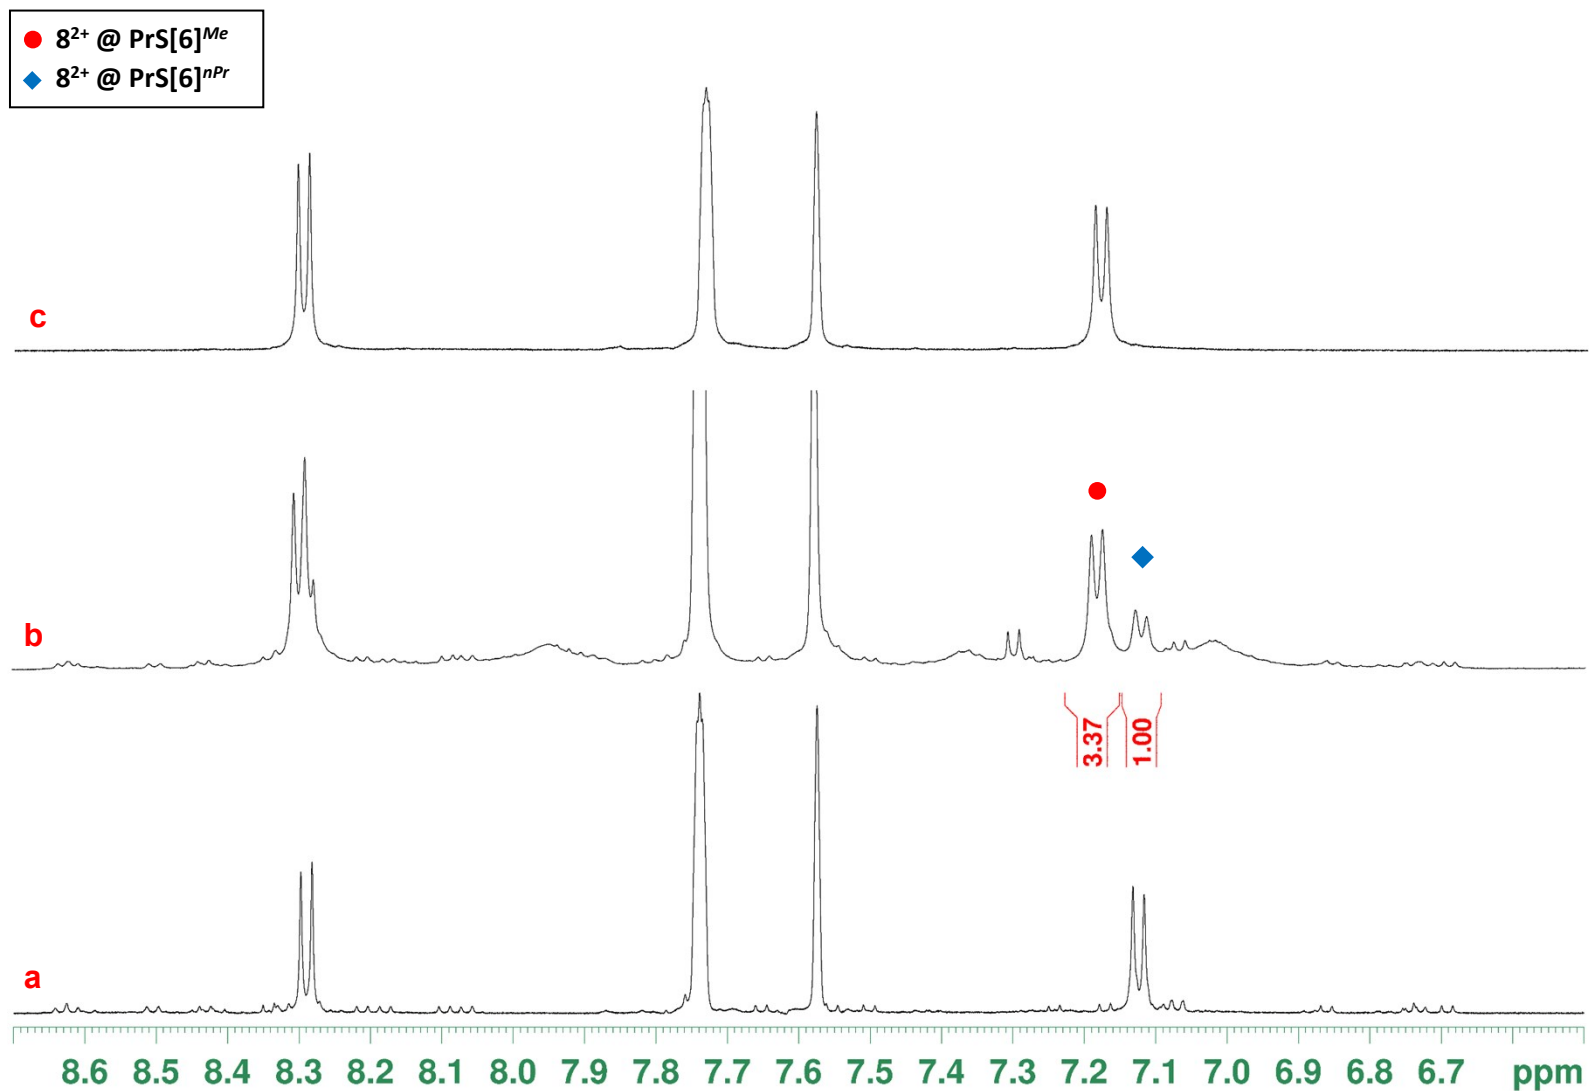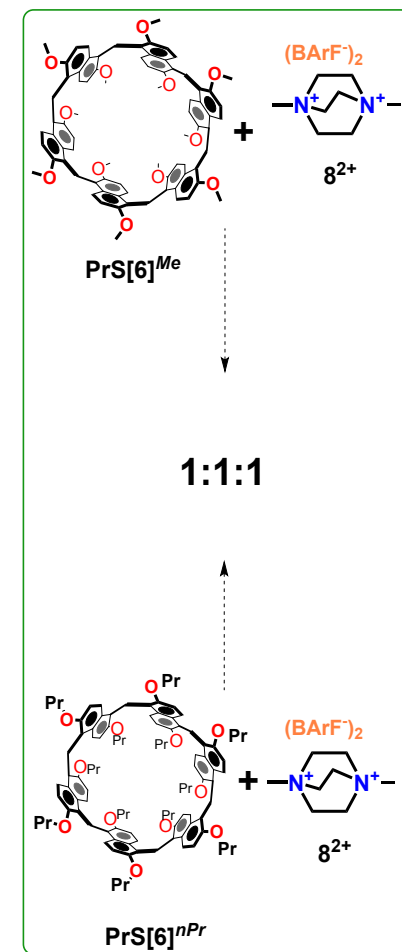

**Figure S75:** Significant portion of  $^1\text{H}$  NMR spectra (600 MHz,  $\text{CD}_2\text{Cl}_2$ , 298 K) of: (a) an equimolar solution (2.38 mM) of  $\text{PrS}[6]^{nPr}$  and  $8(\text{BArF})_2$  in 0.7 mL of  $\text{CD}_2\text{Cl}_2$ , (b) of  $\text{PrS}[6]^{Me}$  in the presence of 1 equivalent of  $\text{PrS}[6]^{nPr}$  and 1 equivalent of  $8(\text{BArF})_2$  and (c) an equimolar solution (2.38 mM) of  $\text{PrS}[6]^{Me}$  and  $8(\text{BArF})_2$  in 0.7 mL of  $\text{CD}_2\text{Cl}_2$ .

$$\text{Method B: } K_{\text{rel}} = K(8^{2+}@\text{PrS}[6]^{nPr}) / K(8^{2+}@\text{PrS}[6]^{Me}) = K(8^{2+}@\text{PrS}[6]^{nPr}) / 4200 = [(1.00/4.37) \times 0.0024]^2 / [(3.37/4.37) \times 0.0024]^2$$

$$K(8^{2+}@\text{PrS}[6]^{nPr}) = 0.09 \times 4.2 \cdot 10^3 = 370 \text{ M}^{-1}$$

## Fluorescence Titration

Determination of association constant by fluorescence titration was performed at 298 K in a 1 cm Quartz cuvette in dichloromethane. The increase in the fluorescent intensity of **PrS[5]<sup>nPr</sup>** at 383 nm were recorded after excitation at 350 nm.

The host concentration was kept constant (2  $\mu\text{M}$ ) while the **[7(BArF)<sub>2</sub>]** was varied from 0.0 - 4.0  $\mu\text{M}$  (0.0 - 2.0 equivalents). Binding Constant (K) was determined by fitting of experimental data according to literature<sup>3</sup> and experiment was repeated three time. Error is smaller of  $\pm 15\%$ .

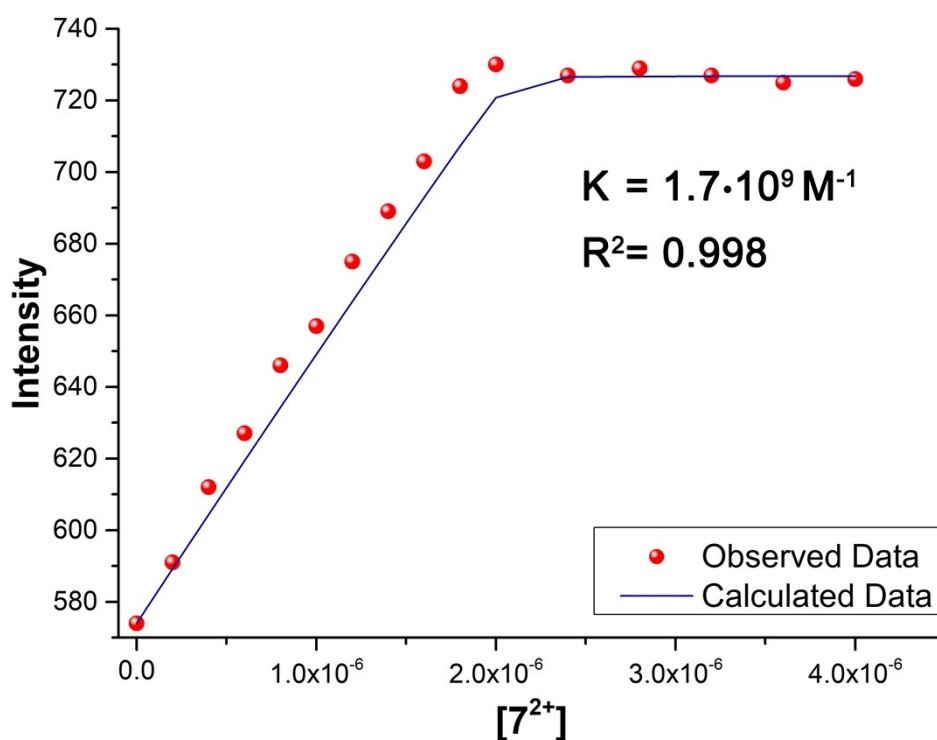

**Figure S76:** Correlation of [7<sup>2+</sup>] on the fluorescence intensity of **PrS[5]<sup>nPr</sup>** for obtaining K.

<sup>3</sup> H. Yao, H. Ke, X. Zhang, S.-J. Pan, M.-S. Li, L.-P. Yang, G. Schreckenbach and W. Jiang, *J. Am. Chem. Soc.*, **2018**, *140*, 13466-13477.

## DFT Calculations

Conformational studies have been performed using the DFT method incorporated in the Gaussian 16 package,<sup>4</sup> and using B97D3/SVP/SVPFIT level of theory in CH<sub>2</sub>Cl<sub>2</sub> as solvent. The starting structure for DFT calculations were obtained by molecular mechanics calculation performed by YASARA software. All optimized structures were characterized by 0 imaginary frequency.

Guess structures for the transition states were located by using a homemade docking program able to manage dependent dihedrals and based on the MMFF94 force field. Starting from the reactive carbocation of the last closure step, initial structures of the final transition state were generated for the attack of the CH<sub>2</sub> moiety at both the Re and Si faces of the naphthyl unit, by activating all the rotatable bonds. All the guessed structures were optimized at the B97D3/SVP level of density functional theory (DFT).<sup>5</sup> Located transition states exhibit one large imaginary frequency associated to a normal coordinate corresponding to the stretching vibration of the forming (C-C) bond. Solvent (1,2-dichloroethane) effects were included via the polarizable continuum model.<sup>6</sup>

Gibbs free energy was evaluated at T = 298.15 K, assuming the standard state c<sub>0</sub> = 1 M.<sup>7,8,9</sup> The so-called  $\Delta G_{50}$  approach was adopted according to which free energies are estimated by halving gas-phase computed entropic terms.<sup>6,10,11</sup> Indeed previous investigations suggest that including half of the 'gas-phase' (based on the particle in a box, rigid rotor, harmonic oscillator model) predicted entropy ( $\Delta S_{\text{soln}} = 0.5 \Delta S_{\text{gas}}$ ) is expected to yield solvation Gibbs free energies in good agreement with experimental data.<sup>12</sup> All DFT computations were carried out by using the Gaussian 16 software.<sup>3</sup>

---

<sup>4</sup> M. J. Frisch, G. W. Trucks, H. B. Schlegel, G. E. Scuseria, M. A. Robb, J. R. Cheeseman, G. Scalmani, V. Barone, B. Mennucci, G. A. Petersson, H. Nakatsuji, M. Caricato, X. Li, H. P. Hratchian, A. F. Izmaylov, J. Bloino, G. Zheng, J. L. Sonnenberg, M. Hada, M. Ehara, K. Toyota, R. Fukuda, J. Hasegawa, M. Ishida, T. Nakajima, Y. Honda, O. Kitao, H. Nakai, T. Vreven, J. A. Montgomery, J. E. Peralta, F. Ogliaro, M. Bearpark, J. J. Heyd, E. Brothers, K. N. Kudin, V. N. Staroverov, R. Kobayashi, J. Normand, K. Raghavachari, A. Rendell, J. C. Burant, S. S. Iyengar, J. Tomasi, M. Cossi, N. Rega, J. M. Millam, M. Klene, J. E. Knox, J. B. Cross, V. Bakken, C. Adamo, J. Jaramillo, R. Gomperts, R. E. Stratmann, O. Yazyev, A. J. Austin, R. Cammi, C. Pomelli, J. W. Ochterski, R. L. Martin, K. Morokuma, V. G. Zakrzewski, G. A. Voth, P. Salvador, J. J. Dannenberg, S. Dapprich, A. D. Daniels, Farkas, J. B. Foresman, J. V. Ortiz, J. Cioslowski, D. J. Fox, Gaussian 16 revision A.03.

<sup>5</sup> S. Grimme, S. Ehrlich, L. Goerigk, *J. Comp. Chem.* 2011, **32**, 1456-1465.

<sup>6</sup> J. Tomasi, B. Mennucci, R. Cammi, *Chem. Rev.* 2005, **105**, 2999-3094.

<sup>7</sup> R. E. Plata, D. A. Singleton, *J. Am. Chem. Soc.* 2015, **137**, 3811-3826.

<sup>8</sup> A. J. Garza, *J. Chem. Theory Comput.* 2019, **15**, 3204-3214.

<sup>9</sup> J. H. Jensen, *Phys. Chem. Chem. Phys.* 2015, **17**, 12441-12451.

<sup>10</sup> X. Huang, K. K. Zhang, Y. Shao, Y. Li, F. Gu, Qu, C. L.-B. Zhao, Z. Ke, *ACS Catal.* 2019, **9**, 5279-5289.

<sup>11</sup> A. Capobianco, S. Meninno, A. Lattanzi, *Catal. Sci. Technol.* 2020, **10**, 1422-1430.

<sup>12</sup> M. H. Abraham, *J. Am. Chem. Soc.* 1981, **103**, 6742-6744.

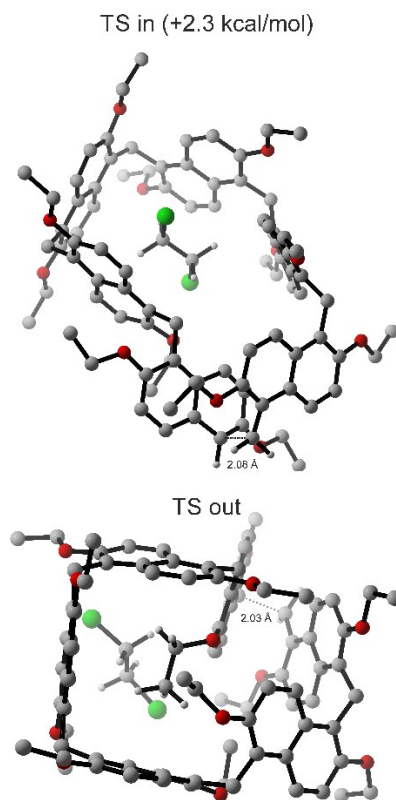

**Figure S77.** The most stable transition states for the closure step of **PrS[6]Et**: TS holding DCE inside the cavity (TS in, top); TS holding DCE outside the cavity and an ethyl group inside the cavity (TS out, bottom). Noncritical hydrogen atoms have been omitted for clarity. Gibbs free energy (B97D3/SVP, kcal/mol, in parentheses) refers to the most stable TS. Distances of the forming bond are given in Å.

## DFT optimized structure of PrS[6]<sup>nPr</sup>

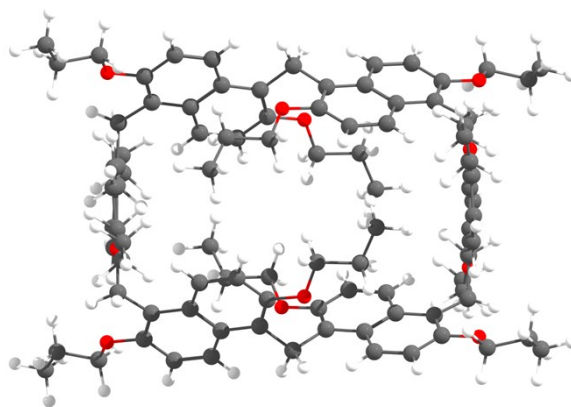

**Figure S78.** DFT-optimized structure (B97D3/SVP/SVPFIT) of PrS[6]<sup>nPr</sup>.

|   |             |             |             |
|---|-------------|-------------|-------------|
| C | -2.50566300 | 4.31649500  | -0.10690400 |
| C | -3.58851700 | 3.60603100  | -0.76371100 |
| C | -4.94062800 | 3.72539300  | -0.29225400 |
| C | -5.19367000 | 4.52824600  | 0.82897000  |
| C | -4.13859800 | 5.21993800  | 1.48271700  |
| C | -2.83985200 | 5.11775800  | 1.02224500  |
| C | -1.15660800 | 4.19263900  | -0.58378700 |
| C | -0.90039400 | 3.35550500  | -1.67624900 |
| C | -1.95605100 | 2.65960200  | -2.32471200 |
| C | -3.26320800 | 2.79515100  | -1.89004800 |
| O | -6.49189700 | 4.61117200  | 1.26315600  |
| C | -6.77447300 | 5.10222200  | 2.57465400  |
| C | -8.23500900 | 4.80362900  | 2.88871500  |
| C | -8.64181800 | 5.30564100  | 4.27665700  |
| O | 0.39195100  | 3.28977800  | -2.11012100 |
| C | 0.82382600  | 2.15679900  | -2.86414700 |
| C | 2.34214100  | 2.19510500  | -2.96823900 |
| C | 2.89042700  | 1.01049100  | -3.76459100 |
| C | -0.00007200 | 4.98972400  | 0.00000200  |
| H | -4.34628600 | 5.84038400  | 2.35826100  |
| H | -2.05626500 | 5.64878100  | 1.56619200  |
| H | -1.74271000 | 2.03450300  | -3.19576600 |
| H | -4.05268800 | 2.27425900  | -2.43183700 |
| H | -6.58104900 | 6.19361000  | 2.62499400  |
| H | -6.10815300 | 4.60893900  | 3.31207200  |
| H | -8.39559800 | 3.71154800  | 2.81185700  |
| H | -8.86596200 | 5.27122600  | 2.10935600  |
| H | -9.70221400 | 5.07939400  | 4.48360700  |
| H | -8.03597100 | 4.83006300  | 5.07026300  |
| H | -8.50827800 | 6.39976500  | 4.36501900  |
| H | 0.37217900  | 2.17120400  | -3.87847800 |
| H | 0.48684500  | 1.22630100  | -2.36253000 |
| H | 2.77267600  | 2.20837800  | -1.95096400 |
| H | 2.63783700  | 3.15023300  | -3.44043900 |
| H | 3.98241100  | 1.09408400  | -3.87763800 |
| H | 2.68872000  | 0.05504100  | -3.24981100 |
| H | 2.44557300  | 0.95408800  | -4.77600300 |
| C | 2.50561100  | -4.31656000 | -0.10668500 |
| C | 3.58847200  | -3.60612600 | -0.76351600 |
| C | 4.94057300  | -3.72542600 | -0.29201900 |
| C | 5.19361200  | -4.52821100 | 0.82925300  |
| C | 4.13853900  | -5.21987600 | 1.48302500  |

|   |             |             |             |
|---|-------------|-------------|-------------|
| C | 2.83980200  | -5.11774000 | 1.02252600  |
| C | 1.15655900  | -4.19274200 | -0.58360200 |
| C | 0.90037100  | -3.35573300 | -1.67616000 |
| C | 1.95603400  | -2.65985900 | -2.32463200 |
| C | 3.26318100  | -2.79532500 | -1.88991200 |
| O | 6.49183400  | -4.61107600 | 1.26346500  |
| C | 6.77443800  | -5.10223000 | 2.57491600  |
| C | 8.23499300  | -4.80370500 | 2.88894600  |
| C | 8.64182000  | -5.30579300 | 4.27685500  |
| O | -0.39195300 | -3.29006100 | -2.11010700 |
| C | -0.82376500 | -2.15706600 | -2.86414700 |
| C | -2.34201800 | -2.19572100 | -2.96895500 |
| C | -2.89025600 | -1.01088900 | -3.76503100 |
| C | 0.00000000  | -4.98973500 | 0.00025300  |
| H | 4.34621200  | -5.84025300 | 2.35862000  |
| H | 2.05622100  | -5.64872400 | 1.56651300  |
| H | 1.74269600  | -2.03483600 | -3.19573900 |
| H | 4.05266300  | -2.27443700 | -2.43170800 |
| H | 6.58097700  | -6.19361500 | 2.62518600  |
| H | 6.10816200  | -4.60897400 | 3.31239400  |
| H | 8.39561900  | -3.71162600 | 2.81213300  |
| H | 8.86590700  | -5.27128900 | 2.10954800  |
| H | 9.70222900  | -5.07959100 | 4.48378800  |
| H | 8.03600900  | -4.83022600 | 5.07049700  |
| H | 8.50824300  | -6.39991600 | 4.36517400  |
| H | -0.37168400 | -2.17119300 | -3.87828600 |
| H | -0.48721600 | -1.22656600 | -2.36223500 |
| H | -2.77301000 | -2.20956200 | -1.95188900 |
| H | -2.63724000 | -3.15071200 | -3.44174100 |
| H | -3.98211000 | -1.09495500 | -3.87899600 |
| H | -2.68941700 | -0.05564800 | -3.24952000 |
| H | -2.44465200 | -0.95367100 | -4.77606900 |
| C | -6.16818400 | 0.72235700  | 0.05620600  |
| C | -6.16810100 | -0.72173600 | -0.05655100 |
| C | -6.13544200 | -1.54938100 | 1.11449300  |
| C | -6.19637300 | -0.93556400 | 2.37461100  |
| C | -6.28761600 | 0.47856000  | 2.48951500  |
| C | -6.25256600 | 1.28206900  | 1.36348600  |
| C | -6.13555500 | 1.55002200  | -1.11482500 |
| C | -6.19636800 | 0.93621300  | -2.37494500 |
| C | -6.28741200 | -0.47792500 | -2.48986400 |
| C | -6.25233700 | -1.28145000 | -1.36384500 |
| O | -6.15535800 | -1.75813600 | 3.46879800  |
| C | -6.14512000 | -1.20972200 | 4.78644500  |
| C | -5.97620100 | -2.35620600 | 5.77479400  |
| C | -5.94646300 | -1.86702000 | 7.22519700  |
| O | -6.15538500 | 1.75880200  | -3.46912500 |
| C | -6.14492900 | 1.21040300  | -4.78678200 |
| C | -5.97609000 | 2.35692800  | -5.77509600 |
| C | -5.94618600 | 1.86778100  | -7.22550700 |
| C | -6.10787000 | 3.06915200  | -1.01974600 |
| H | -6.38440700 | 0.94730800  | 3.47197100  |
| H | -6.32732100 | 2.36208900  | 1.48680100  |
| H | -6.38408600 | -0.94667100 | -3.47232900 |
| H | -6.32695600 | -2.36148100 | -1.48719600 |
| H | -7.09205100 | -0.66388700 | 4.97804900  |
| H | -5.31310100 | -0.48565700 | 4.89099800  |
| H | -5.04084500 | -2.89437200 | 5.53013300  |
| H | -6.80306100 | -3.07626000 | 5.62684100  |
| H | -5.82142400 | -2.71144800 | 7.92500000  |



|   |             |             |             |
|---|-------------|-------------|-------------|
| H | -5.11051600 | -1.16321600 | 7.39526200  |
| H | -6.88314600 | -1.34420100 | 7.49368300  |
| H | -7.09176500 | 0.66443400  | -4.97847700 |
| H | -5.31279800 | 0.48645900  | -4.89126900 |
| H | -5.04082400 | 2.89521800  | -5.53036300 |
| H | -6.80305700 | 3.07686600  | -5.62718000 |
| H | -5.82119900 | 2.71224100  | -7.92528000 |
| H | -5.11013800 | 1.16408600  | -7.39552700 |
| H | -6.88278300 | 1.34485100  | -7.49407700 |
| C | 6.16812100  | -0.72232500 | 0.05628700  |
| C | 6.16810200  | 0.72176300  | -0.05656300 |
| C | 6.13541900  | 1.54948400  | 1.11443200  |
| C | 6.19631500  | 0.93574500  | 2.37458900  |
| C | 6.28750600  | -0.47837100 | 2.48958200  |
| C | 6.25244600  | -1.28195200 | 1.36360600  |
| C | 6.13550500  | -1.55006800 | -1.11469100 |
| C | 6.19640900  | -0.93634200 | -2.37484800 |
| C | 6.28758400  | 0.47778300  | -2.48985300 |
| C | 6.25247400  | 1.28138800  | -1.36389000 |
| O | 6.15526700  | 1.75837900  | 3.46872300  |
| C | 6.14501900  | 1.21003800  | 4.78640000  |
| C | 5.97609600  | 2.35657700  | 5.77468400  |
| C | 5.94636500  | 1.86747700  | 7.22511500  |
| O | 6.15542400  | -1.75899800 | -3.46897900 |
| C | 6.14522200  | -1.21069000 | -4.78667600 |
| C | 5.97640300  | -2.35726700 | -5.77493200 |
| C | 5.94674200  | -1.86821500 | -7.22538100 |
| C | 6.10781100  | -3.06919700 | -1.01953000 |
| H | 6.38428000  | -0.94705700 | 3.47206800  |
| H | 6.32717900  | -2.36196300 | 1.48699500  |
| H | 6.38440800  | 0.94645700  | -3.47233900 |
| H | 6.32719300  | 2.36140600  | -1.48731300 |
| H | 7.09194900  | 0.66420800  | 4.97802600  |
| H | 5.31299800  | 0.48598500  | 4.89100000  |
| H | 5.04073400  | 2.89471800  | 5.52999400  |
| H | 6.80294700  | 3.07663300  | 5.62668600  |
| H | 5.82131400  | 2.71194400  | 7.92486800  |
| H | 5.11042700  | 1.16367200  | 7.39522200  |
| H | 6.88305400  | 1.34468600  | 7.49363400  |
| H | 7.09214000  | -0.66483500 | -4.97827900 |
| H | 5.31318000  | -0.48666300 | -4.89132900 |
| H | 5.04105200  | -2.89544800 | -5.53028600 |
| H | 6.80328000  | -3.07727700 | -5.62685800 |
| H | 5.82177800  | -2.71271100 | -7.92511500 |
| H | 5.11078100  | -1.16445700 | -7.39556500 |
| H | 6.88342300  | -1.34538700 | -7.49385500 |
| C | -3.58831200 | -3.60540500 | 0.76342200  |
| C | -2.50550900 | -4.31612700 | 0.10681200  |
| C | -1.15645900 | -4.19230700 | 0.58372400  |
| C | -0.90017900 | -3.35489500 | 1.67596300  |
| C | -1.95577300 | -2.65864400 | 2.32415400  |
| C | -3.26293900 | -2.79421600 | 1.88951500  |
| C | -4.94043400 | -3.72482000 | 0.29201800  |
| C | -5.19352900 | -4.52788000 | -0.82904900 |
| C | -4.13850000 | -5.21978500 | -1.48264300 |
| C | -2.83975600 | -5.11761800 | -1.02215900 |
| O | 0.39215200  | -3.28930000 | 2.10989000  |
| C | 0.82417100  | -2.15645000 | 2.86399900  |
| C | 2.34238000  | -2.19581700 | 2.96927600  |
| C | 2.89102000  | -1.01133300 | 3.76559000  |

|   |             |             |             |
|---|-------------|-------------|-------------|
| O | -6.49175900 | -4.61068200 | -1.26323100 |
| C | -6.77460200 | -5.10335000 | -2.57404200 |
| C | -8.23530000 | -4.80545600 | -2.88800700 |
| C | -8.64237100 | -5.30903000 | -4.27530500 |
| C | -6.10766100 | -3.06850800 | 1.01946700  |
| H | -1.74238800 | -2.03325400 | 3.19498800  |
| H | -4.05238700 | -2.27307800 | 2.43112000  |
| H | -4.34619600 | -5.84037600 | -2.35807800 |
| H | -2.05621200 | -5.64883400 | -1.56597500 |
| H | 0.37177100  | -2.17033200 | 3.87800200  |
| H | 0.48818000  | -1.22582700 | 2.36193800  |
| H | 2.77370000  | -2.20983600 | 1.95234900  |
| H | 2.63696200  | -3.15098600 | 3.44209600  |
| H | 3.98276900  | -1.09613900 | 3.88005900  |
| H | 2.69106200  | -0.05596100 | 3.24998200  |
| H | 2.44499600  | -0.95381500 | 4.77642400  |
| H | -6.58093800 | -6.19475300 | -2.62314600 |
| H | -6.10862900 | -4.61079100 | -3.31225900 |
| H | -8.39613600 | -3.71333300 | -2.81225200 |
| H | -8.86591700 | -5.27238500 | -2.10797700 |
| H | -9.70288500 | -5.08328100 | -4.48218900 |
| H | -8.03687500 | -4.83412200 | -5.06958100 |
| H | -8.50856500 | -6.40321100 | -4.36255800 |
| C | 3.58826600  | 3.60549800  | 0.76328600  |
| C | 2.50545900  | 4.31619000  | 0.10664700  |
| C | 1.15640500  | 4.19239200  | 0.58356400  |
| C | 0.90014000  | 3.35509400  | 1.67588100  |
| C | 1.95573300  | 2.65887400  | 2.32410200  |
| C | 3.26289400  | 2.79438600  | 1.88943800  |
| C | 4.94038700  | 3.72486900  | 0.29185100  |
| C | 5.19347100  | 4.52787000  | -0.82926300 |
| C | 4.13843600  | 5.21972500  | -1.48289700 |
| C | 2.83969800  | 5.11758800  | -1.02239000 |
| O | -0.39217500 | 3.28957400  | 2.10989600  |
| C | -0.82425200 | 2.15654400  | 2.86372400  |
| C | -2.34243300 | 2.19606500  | 2.96922700  |
| C | -2.89108800 | 1.01138600  | 3.76523400  |
| O | 6.49170100  | 4.61065000  | -1.26344900 |
| C | 6.77458100  | 5.10347200  | -2.57419300 |
| C | 8.23531700  | 4.80570400  | -2.88809600 |
| C | 8.64243300  | 5.30940100  | -4.27533700 |
| C | 6.10762900  | 3.06861100  | 1.01932600  |
| H | 1.74233700  | 2.03355100  | 3.19498300  |
| H | 4.05232600  | 2.27325900  | 2.43106900  |
| H | 4.34611900  | 5.84026100  | -2.35837400 |
| H | 2.05615500  | 5.64878300  | -1.56622900 |
| H | -0.37173300 | 2.17006700  | 3.87767500  |
| H | -0.48841700 | 1.22603700  | 2.36134300  |
| H | -2.77388700 | 2.21046100  | 1.95236300  |
| H | -2.63682200 | 3.15111900  | 3.44240800  |
| H | -3.98279400 | 1.09632800  | 3.88000200  |
| H | -2.69141500 | 0.05617700  | 3.24922200  |
| H | -2.44482800 | 0.95341700  | 4.77593900  |
| H | 6.58084700  | 6.19486600  | -2.62319400 |
| H | 6.10868500  | 4.61094100  | -3.31250000 |
| H | 8.39622500  | 3.71358600  | -2.81240900 |
| H | 8.86585900  | 5.27262200  | -2.10799900 |
| H | 9.70297900  | 5.08375000  | -4.48217000 |
| H | 8.03702400  | 4.83449600  | -5.06968000 |
| H | 8.50854700  | 6.40357700  | -4.36252600 |

|   |             |             |             |
|---|-------------|-------------|-------------|
| H | -6.14096800 | -3.46719300 | 2.04560100  |
| H | -7.03531700 | -3.40313400 | 0.52831800  |
| H | -7.03551500 | 3.40373300  | -0.52854400 |
| H | -6.14122800 | 3.46788500  | -2.04585700 |
| H | -0.37524700 | 5.65710500  | 0.79031700  |
| H | 0.37514700  | 5.65733000  | -0.79010000 |
| H | 6.14094400  | 3.46734900  | 2.04543800  |
| H | 7.03527700  | 3.40322800  | 0.52815600  |
| H | 7.03546000  | -3.40374800 | -0.52831200 |
| H | 6.14117300  | -3.46798000 | -2.04562000 |
| H | 0.37514700  | -5.65705100 | 0.79063400  |
| H | -0.37523000 | -5.65740900 | -0.78978500 |

1 2 1.0 6 1.5 7 1.5  
2 3 1.5 10 1.5  
3 4 1.5 93 1.0  
4 5 1.5 11 1.0  
5 6 2.0 20 1.0  
6 21 1.0  
7 8 1.5 19 1.0  
8 9 1.5 15 1.0  
9 10 2.0 22 1.0  
10 23 1.0  
11 12 1.0  
12 13 1.0 24 1.0 25 1.0  
13 14 1.0 26 1.0 27 1.0  
14 28 1.0 29 1.0 30 1.0  
15 16 1.0  
16 17 1.0 31 1.0 32 1.0  
17 18 1.0 33 1.0 34 1.0  
18 35 1.0 36 1.0 37 1.0  
19 188 1.0 227 1.0 228 1.0  
20  
21  
22  
23  
24  
25  
26  
27  
28  
29  
30  
31  
32  
33  
34  
35  
36  
37  
38 39 1.0 43 1.5 44 1.5  
39 40 1.5 47 1.5  
40 41 1.5 130 1.0  
41 42 1.5 48 1.0  
42 43 2.0 57 1.0  
43 58 1.0  
44 45 1.5 56 1.0  
45 46 1.5 52 1.0  
46 47 2.0 59 1.0  
47 60 1.0

48 49 1.0  
49 50 1.0 61 1.0 62 1.0  
50 51 1.0 63 1.0 64 1.0  
51 65 1.0 66 1.0 67 1.0  
52 53 1.0  
53 54 1.0 68 1.0 69 1.0  
54 55 1.0 70 1.0 71 1.0  
55 72 1.0 73 1.0 74 1.0  
56 151 1.0 233 1.0 234 1.0  
57  
58  
59  
60  
61  
62  
63  
64  
65  
66  
67  
68  
69  
70  
71  
72  
73  
74  
75 76 1.0 80 1.5 81 1.5  
76 77 1.5 84 1.5  
77 78 1.5 167 1.0  
78 79 1.5 85 1.0  
79 80 2.0 94 1.0  
80 95 1.0  
81 82 1.5 93 1.0  
82 83 1.5 89 1.0  
83 84 2.0 96 1.0  
84 97 1.0  
85 86 1.0  
86 87 1.0 98 1.0 99 1.0  
87 88 1.0 100 1.0 101 1.0  
88 102 1.0 103 1.0 104 1.0  
89 90 1.0  
90 91 1.0 105 1.0 106 1.0  
91 92 1.0 107 1.0 108 1.0  
92 109 1.0 110 1.0 111 1.0  
93 225 1.0 226 1.0  
94  
95  
96  
97  
98  
99  
100  
101  
102  
103  
104  
105  
106  
107

108  
109  
110  
111  
112 113 1.0 117 1.5 118 1.5  
113 114 1.5 121 1.5  
114 115 1.5 204 1.0  
115 116 1.5 122 1.0  
116 117 2.0 131 1.0  
117 132 1.0  
118 119 1.5 130 1.0  
119 120 1.5 126 1.0  
120 121 2.0 133 1.0  
121 134 1.0  
122 123 1.0  
123 124 1.0 135 1.0 136 1.0  
124 125 1.0 137 1.0 138 1.0  
125 139 1.0 140 1.0 141 1.0  
126 127 1.0  
127 128 1.0 142 1.0 143 1.0  
128 129 1.0 144 1.0 145 1.0  
129 146 1.0 147 1.0 148 1.0  
130 231 1.0 232 1.0  
131  
132  
133  
134  
135  
136  
137  
138  
139  
140  
141  
142  
143  
144  
145  
146  
147  
148  
149 150 1.0 154 1.5 155 1.5  
150 151 1.5 158 1.5  
151 152 1.5  
152 153 1.5 159 1.0  
153 154 2.0 168 1.0  
154 169 1.0  
155 156 1.5 167 1.0  
156 157 1.5 163 1.0  
157 158 2.0 170 1.0  
158 171 1.0  
159 160 1.0  
160 161 1.0 172 1.0 173 1.0  
161 162 1.0 174 1.0 175 1.0  
162 176 1.0 177 1.0 178 1.0  
163 164 1.0  
164 165 1.0 179 1.0 180 1.0  
165 166 1.0 181 1.0 182 1.0  
166 183 1.0 184 1.0 185 1.0  
167 223 1.0 224 1.0

168  
169  
170  
171  
172  
173  
174  
175  
176  
177  
178  
179  
180  
181  
182  
183  
184  
185  
186 187 1.0 191 1.5 192 1.5  
187 188 1.5 195 1.5  
188 189 1.5  
189 190 1.5 196 1.0  
190 191 2.0 205 1.0  
191 206 1.0  
192 193 1.5 204 1.0  
193 194 1.5 200 1.0  
194 195 2.0 207 1.0  
195 208 1.0  
196 197 1.0  
197 198 1.0 209 1.0 210 1.0  
198 199 1.0 211 1.0 212 1.0  
199 213 1.0 214 1.0 215 1.0  
200 201 1.0  
201 202 1.0 216 1.0 217 1.0  
202 203 1.0 218 1.0 219 1.0  
203 220 1.0 221 1.0 222 1.0  
204 229 1.0 230 1.0  
205  
206  
207  
208  
209  
210  
211  
212  
213  
214  
215  
216  
217  
218  
219  
220  
221  
222  
223  
224  
225  
226  
227

228  
229  
230  
231  
232  
233  
234

---

0 imaginary frequency

### DFT optimized structure of the PrS[5]<sup>nPr</sup>

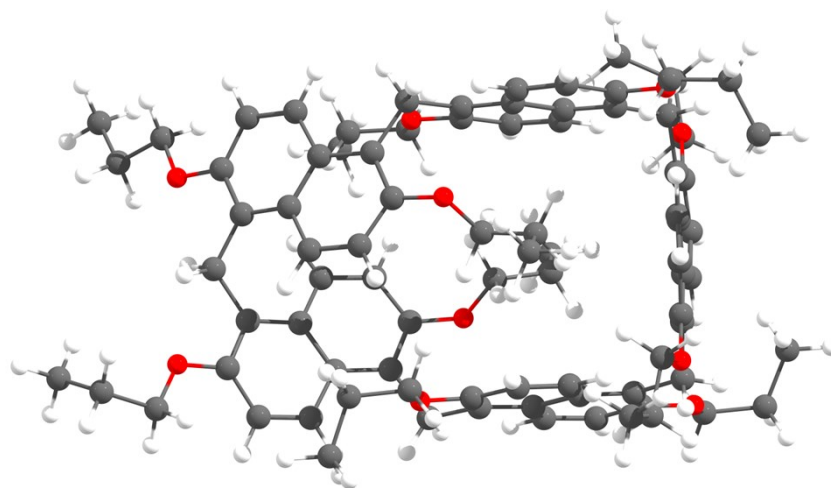

**Figure S79.** DFT-optimized structure (B97D3/SVP/SVPFIT) of the PrS[5]<sup>nPr</sup>.

|   |             |             |             |
|---|-------------|-------------|-------------|
| C | -4.05515200 | -0.18062000 | 1.50819400  |
| C | -2.43087900 | 2.10928700  | 2.00701800  |
| C | -1.95650500 | 0.81841600  | 2.23826400  |
| C | -2.79267200 | -0.31336400 | 2.04261800  |
| H | -4.67592300 | -1.06546800 | 1.36269700  |
| H | -2.40822000 | -1.29438100 | 2.33200300  |
| C | -4.55536800 | 1.09996400  | 1.12767100  |
| C | -3.76367600 | 2.26396300  | 1.47650700  |
| C | -4.34325600 | 3.53836000  | 1.23319600  |
| C | -5.56949000 | 3.67430700  | 0.60727700  |
| C | -6.26857500 | 2.53007400  | 0.14258100  |
| C | -5.77199300 | 1.23897600  | 0.38159400  |
| H | -3.81032600 | 4.44516600  | 1.52607400  |
| H | -5.97170800 | 4.67604100  | 0.44000900  |
| C | -6.53771300 | 0.06184000  | -0.20800000 |
| H | -7.24149600 | -0.32587400 | 0.54905200  |
| H | -7.18758400 | 0.46481800  | -1.00447900 |
| C | -1.53895800 | 3.30193100  | 2.33372800  |
| H | -1.34887800 | 3.30349500  | 3.41732100  |
| H | -2.07965400 | 4.23510000  | 2.12056900  |
| O | -7.43372200 | 2.62316300  | -0.57125500 |
| O | -0.67956100 | 0.61886300  | 2.71012700  |
| C | -7.92943100 | 3.89426300  | -0.97273400 |
| H | -8.15716400 | 4.51452300  | -0.07949000 |
| H | -7.16119400 | 4.43159000  | -1.56763700 |
| C | 0.20217400  | -0.01084800 | 1.75874000  |
| H | -0.28280600 | -0.92177500 | 1.35311900  |

|   |             |             |             |
|---|-------------|-------------|-------------|
| H | 0.36103500  | 0.68660800  | 0.91556000  |
| C | 2.16484500  | 3.45049200  | 0.04424800  |
| C | -0.22227300 | 3.35086200  | 1.57734700  |
| C | -0.25996100 | 3.59598800  | 0.19746000  |
| C | 0.93792600  | 3.64484900  | -0.56333200 |
| H | 3.06464200  | 3.51527500  | -0.56337600 |
| H | 0.90673500  | 3.84300500  | -1.63703600 |
| C | 1.05125500  | 3.18704800  | 2.21913700  |
| C | 2.27430100  | 3.21027200  | 1.44188000  |
| C | 3.55375300  | 3.01205100  | 2.06373400  |
| C | 3.60533900  | 2.86305600  | 3.45524400  |
| C | 2.41226200  | 2.85296600  | 4.22860100  |
| C | 1.17738300  | 2.99257900  | 3.62393800  |
| H | 2.45684100  | 2.71314800  | 5.31138100  |
| O | -1.49173600 | 3.80315100  | -0.35688000 |
| O | 4.84530600  | 2.70454900  | 4.02389300  |
| C | 4.83771100  | 2.98602400  | 1.24179200  |
| H | 5.68858100  | 2.92363000  | 1.93792800  |
| H | 4.94331600  | 3.94408500  | 0.70925000  |
| C | 5.05907200  | -0.20022500 | -1.73989500 |
| C | 5.12478100  | 1.12747700  | -2.11763500 |
| C | 5.04558100  | 2.16237600  | -1.14793600 |
| C | 4.94315200  | 1.86303100  | 0.21658900  |
| H | 5.11438200  | -0.96761100 | -2.51020500 |
| H | 5.23287400  | 1.37407500  | -3.17711900 |
| C | 4.95417000  | -0.57446000 | -0.37028100 |
| C | 4.95180600  | 0.48421700  | 0.61646500  |
| C | 4.98635800  | 0.10752700  | 1.98771800  |
| C | 4.99369800  | -1.22155800 | 2.36820100  |
| C | 4.92196900  | -2.25505900 | 1.39614200  |
| C | 4.88722700  | -1.95155000 | 0.02778300  |
| H | 5.02848400  | 0.87342100  | 2.76073600  |
| H | 5.04332600  | -1.46525400 | 3.43201900  |
| O | 5.05748100  | 3.48838800  | -1.50453700 |
| O | 4.86837200  | -3.58158300 | 1.74517600  |
| H | 4.84943100  | -4.03213000 | -0.46825200 |
| H | 5.70668200  | -3.03548400 | -1.64102200 |
| C | 4.80915600  | -3.07075300 | -1.00385300 |
| C | 1.32696100  | -2.99465500 | -3.63846900 |
| C | 3.58492200  | -3.05959900 | -1.91232800 |
| C | 3.73903600  | -2.92688400 | -3.29805500 |
| C | 2.60496100  | -2.89310200 | -4.15465200 |
| H | 0.48350900  | -2.92206100 | -4.32734400 |
| H | 2.73052900  | -2.76725200 | -5.23278700 |
| C | 2.26002100  | -3.21453700 | -1.38074700 |
| C | 1.09612800  | -3.16964400 | -2.24441400 |
| C | -0.22353500 | -3.29802900 | -1.69462400 |
| C | -0.36374700 | -3.53078200 | -0.31921900 |
| C | 0.77447900  | -3.60450200 | 0.52492200  |
| C | 2.04591000  | -3.43741900 | 0.00771200  |
| H | 0.66136200  | -3.79996800 | 1.59327900  |
| H | 2.89534200  | -3.51066600 | 0.68376700  |
| O | 5.02003700  | -2.80829400 | -3.77834500 |
| O | -1.63652700 | -3.69604000 | 0.14765900  |
| C | -1.48177600 | -3.22897800 | -2.54421600 |
| H | -2.04434700 | -4.16060100 | -2.38615000 |
| H | -1.21274000 | -3.21547500 | -3.61039900 |
| C | -4.01130600 | 0.27052200  | -1.84851600 |
| C | -2.72853600 | 0.39178500  | -2.33661300 |
| C | -1.89190000 | -0.74653100 | -2.48601400 |



|   |             |             |             |
|---|-------------|-------------|-------------|
| C | -2.38431100 | -2.03265300 | -2.26650800 |
| H | -4.62959200 | 1.16185900  | -1.73104200 |
| H | -2.32989700 | 1.36895300  | -2.62107900 |
| C | -3.73705400 | -2.17651000 | -1.78762600 |
| C | -4.53177000 | -1.00450700 | -1.47584900 |
| C | -5.76756200 | -1.12978400 | -0.75846200 |
| C | -6.27175900 | -2.41535400 | -0.51024000 |
| C | -5.57341400 | -3.56778600 | -0.95664600 |
| C | -4.33214800 | -3.44637600 | -1.55383400 |
| H | -5.99017800 | -4.56472300 | -0.79178200 |
| H | -3.79417500 | -4.35944900 | -1.81717100 |
| O | -0.59078900 | -0.56136400 | -2.89619600 |
| O | -7.44602300 | -2.50139300 | 0.19197300  |
| C | 4.72176700  | 3.86081100  | -2.83836200 |
| H | 3.83355200  | 3.28979000  | -3.17716300 |
| H | 5.55754400  | 3.61822700  | -3.52867100 |
| C | 4.96231200  | 2.42397500  | 5.41464300  |
| H | 4.54374100  | 3.26380200  | 6.00668500  |
| H | 4.38028900  | 1.51120600  | 5.66574000  |
| C | -1.60609400 | 4.00533800  | -1.76235600 |
| H | -1.00373400 | 4.88545600  | -2.07297100 |
| H | -1.20242700 | 3.12307100  | -2.29787000 |
| C | 4.77243600  | -3.95436400 | 3.11672700  |
| H | 5.69299200  | -3.64843100 | 3.65567000  |
| H | 3.91404200  | -3.43320100 | 3.58994100  |
| C | 5.24284500  | -2.52602000 | -5.15583200 |
| H | 4.70020600  | -1.59982800 | -5.44327700 |
| H | 4.84979500  | -3.35439600 | -5.78065200 |
| C | -7.84492200 | -3.74540400 | 0.75209800  |
| H | -7.00210100 | -4.19761600 | 1.31772600  |
| H | -8.12519800 | -4.46102600 | -0.05028900 |
| C | 0.24937500  | 0.05442100  | -1.89922100 |
| H | -0.23616300 | 0.97956600  | -1.52740700 |
| H | 0.34212900  | -0.63919900 | -1.04349100 |
| C | -1.85712000 | -3.95749700 | 1.52788900  |
| H | -1.36207800 | -4.90718800 | 1.82388900  |
| H | -1.40858900 | -3.15130600 | 2.14463100  |
| H | 0.28532300  | 2.93442400  | 4.25007800  |
| C | -9.19299500 | 3.67335200  | -1.79700000 |
| H | -8.92912300 | 3.06939700  | -2.68627100 |
| H | -9.52062300 | 4.66169700  | -2.17362100 |
| C | 1.52897100  | -0.36155200 | 2.40805300  |
| H | 2.06088900  | 0.56495300  | 2.67640500  |
| H | 2.14451100  | -0.85333300 | 1.63317100  |
| C | 4.43195100  | 5.35674300  | -2.85994000 |
| H | 3.61281700  | 5.56529500  | -2.14620300 |
| H | 5.32142900  | 5.89495800  | -2.48182100 |
| C | 6.43636700  | 2.22421100  | 5.74834500  |
| H | 6.98376400  | 3.14827700  | 5.48104700  |
| H | 6.51000200  | 2.12425700  | 6.84866400  |
| C | -3.07535200 | 4.22151000  | -2.10356800 |
| H | -3.18496600 | 4.11200800  | -3.19949600 |
| H | -3.65906000 | 3.40662600  | -1.63954600 |
| C | 4.58482800  | -5.46485900 | 3.19812500  |
| H | 5.44499100  | -5.95277600 | 2.70104300  |
| H | 4.64309400  | -5.74284700 | 4.26840500  |
| C | 6.74113100  | -2.35734700 | -5.38108100 |
| H | 6.89649300  | -2.25391000 | -6.47254000 |
| H | 7.24757100  | -3.29453600 | -5.08068500 |
| C | -9.03352400 | -3.49594900 | 1.67279900  |

|   |              |             |             |
|---|--------------|-------------|-------------|
| H | -8.72804300  | -2.77006600 | 2.44985400  |
| H | -9.83411600  | -3.00744700 | 1.08597800  |
| C | 1.61995400   | 0.36708900  | -2.47368800 |
| H | 2.20249600   | 0.85364800  | -1.67033500 |
| H | 2.14320700   | -0.57519400 | -2.70122900 |
| C | -3.35909900  | -4.03114100 | 1.76675100  |
| H | -3.82036700  | -3.12897800 | 1.33177500  |
| H | -3.76962900  | -4.88282000 | 1.19476400  |
| C | -10.32416600 | 2.99847800  | -1.01608400 |
| H | -11.21753300 | 2.85620600  | -1.64973100 |
| H | -10.00674100 | 2.01000200  | -0.64258700 |
| H | -10.62287200 | 3.60746700  | -0.14217500 |
| C | 1.40044500   | -1.26179400 | 3.63652200  |
| H | 2.39317500   | -1.48176300 | 4.06842100  |
| H | 0.78627300   | -0.77812100 | 4.41556700  |
| H | 0.92145400   | -2.22672700 | 3.38411600  |
| C | 4.05847700   | 5.85157100  | -4.25975600 |
| H | 3.85060200   | 6.93572100  | -4.25636600 |
| H | 4.87367700   | 5.67004200  | -4.98493000 |
| H | 3.15519000   | 5.33899300  | -4.64058900 |
| C | 7.07687100   | 1.01321500  | 5.06416200  |
| H | 8.12483500   | 0.88281600  | 5.38740900  |
| H | 6.53090400   | 0.08251500  | 5.30850400  |
| H | 7.07190500   | 1.12116600  | 3.96688300  |
| C | -3.61403000  | 5.58103600  | -1.65289500 |
| H | -4.69217400  | 5.67617600  | -1.87243600 |
| H | -3.47854300  | 5.71522500  | -0.56710900 |
| H | -3.08898300  | 6.40879600  | -2.16563100 |
| C | 3.26911300   | -5.96379800 | 2.59389000  |
| H | 3.15841800   | -7.05446400 | 2.72786000  |
| H | 2.40085500   | -5.47508900 | 3.07475800  |
| H | 3.21415900   | -5.74712800 | 1.51427200  |
| C | 7.35578300   | -1.16399700 | -4.64422800 |
| H | 8.42743700   | -1.05567600 | -4.88820100 |
| H | 6.85002800   | -0.22022300 | -4.92241100 |
| H | 7.26666300   | -1.27656400 | -3.55103200 |
| C | -9.55065300  | -4.78484100 | 2.31680800  |
| H | -10.40952400 | -4.58156100 | 2.97984000  |
| H | -9.88292200  | -5.51353600 | 1.55392600  |
| H | -8.76783500  | -5.27478400 | 2.92571600  |
| C | 1.58269700   | 1.25403700  | -3.71820400 |
| H | 2.60112200   | 1.42827800  | -4.10926600 |
| H | 0.98550000   | 0.78297700  | -4.51781200 |
| H | 1.13071300   | 2.24049600  | -3.50050300 |
| C | -3.71208400  | -4.15437200 | 3.25007000  |
| H | -4.80535900  | -4.22592400 | 3.38969900  |
| H | -3.25732500  | -5.05327000 | 3.70728400  |
| H | -3.36306400  | -3.27450000 | 3.82167700  |

1 4 2.0 5 1.0 7 1.5  
2 3 1.5 8 1.5 18 1.0  
3 4 1.5 22 1.0  
4 6 1.0  
5  
6  
7 8 1.0 12 1.5  
8 9 1.5  
9 10 2.0 13 1.0  
10 11 1.5 14 1.0  
11 12 1.5 21 1.0

12 15 1.0  
13  
14  
15 16 1.0 17 1.0 93 1.0  
16  
17  
18 19 1.0 20 1.0 30 1.0  
19  
20  
21 23 1.0  
22 26 1.0  
23 24 1.0 25 1.0 126 1.0  
24  
25  
26 27 1.0 28 1.0 129 1.0  
27  
28  
29 32 2.0 33 1.0 36 1.5  
30 31 1.5 35 1.5  
31 32 1.5 42 1.0  
32 34 1.0  
33  
34  
35 36 1.0 40 1.5  
36 37 1.5  
37 38 1.5 44 1.0  
38 39 1.5 43 1.0  
39 40 2.0 41 1.0  
40 125 1.0  
41  
42 107 1.0  
43 104 1.0  
44 45 1.0 46 1.0 50 1.0  
45  
46  
47 48 2.0 51 1.0 53 1.5  
48 49 1.5 52 1.0  
49 50 1.5 61 1.0  
50 54 1.5  
51  
52  
53 54 1.5 58 1.5  
54 55 1.5  
55 56 2.0 59 1.0  
56 57 1.5 60 1.0  
57 58 1.5 62 1.0  
58 65 1.0  
59  
60  
61 101 1.0  
62 110 1.0  
63 65 1.0  
64 65 1.0  
65 67 1.0  
66 69 2.0 70 1.0 73 1.5  
67 68 1.5 72 1.5  
68 69 1.5 80 1.0  
69 71 1.0  
70  
71

72 73 1.0 77 1.5  
73 74 1.5  
74 75 1.5 82 1.0  
75 76 1.5 81 1.0  
76 77 2.0 78 1.0  
77 79 1.0  
78  
79  
80 113 1.0  
81 122 1.0  
82 83 1.0 84 1.0 88 1.0  
83  
84  
85 86 2.0 89 1.0 92 1.5  
86 87 1.5 90 1.0  
87 88 1.5 99 1.0  
88 91 1.5  
89  
90  
91 92 1.0 96 1.5  
92 93 1.5  
93 94 1.5  
94 95 1.5 100 1.0  
95 96 2.0 97 1.0  
96 98 1.0  
97  
98  
99 119 1.0  
100 116 1.0  
101 102 1.0 103 1.0 132 1.0  
102  
103  
104 105 1.0 106 1.0 135 1.0  
105  
106  
107 108 1.0 109 1.0 138 1.0  
108  
109  
110 111 1.0 112 1.0 141 1.0  
111  
112  
113 114 1.0 115 1.0 144 1.0  
114  
115  
116 117 1.0 118 1.0 147 1.0  
117  
118  
119 120 1.0 121 1.0 150 1.0  
120  
121  
122 123 1.0 124 1.0 153 1.0  
123  
124  
125  
126 127 1.0 128 1.0 156 1.0  
127  
128  
129 130 1.0 131 1.0 160 1.0  
130  
131

132 133 1.0 134 1.0 164 1.0  
133  
134  
135 136 1.0 137 1.0 168 1.0  
136  
137  
138 139 1.0 140 1.0 172 1.0  
139  
140  
141 142 1.0 143 1.0 176 1.0  
142  
143  
144 145 1.0 146 1.0 180 1.0  
145  
146  
147 148 1.0 149 1.0 184 1.0  
148  
149  
150 151 1.0 152 1.0 188 1.0  
151  
152  
153 154 1.0 155 1.0 192 1.0  
154  
155  
156 157 1.0 158 1.0 159 1.0  
157  
158  
159  
160 161 1.0 162 1.0 163 1.0  
161  
162  
163  
164 165 1.0 166 1.0 167 1.0  
165  
166  
167  
168 169 1.0 170 1.0 171 1.0  
169  
170  
171  
172 173 1.0 174 1.0 175 1.0  
173  
174  
175  
176 177 1.0 178 1.0 179 1.0  
177  
178  
179  
180 181 1.0 182 1.0 183 1.0  
181  
182  
183  
184 185 1.0 186 1.0 187 1.0  
185  
186  
187  
188 189 1.0 190 1.0 191 1.0  
189  
190  
191

192 193 1.0 194 1.0 195 1.0  
193  
194  
195

## DFT - optimized structures of Complexes

Atomic coordinates of  $6^+@PrS[6]^{nPr}$  complex

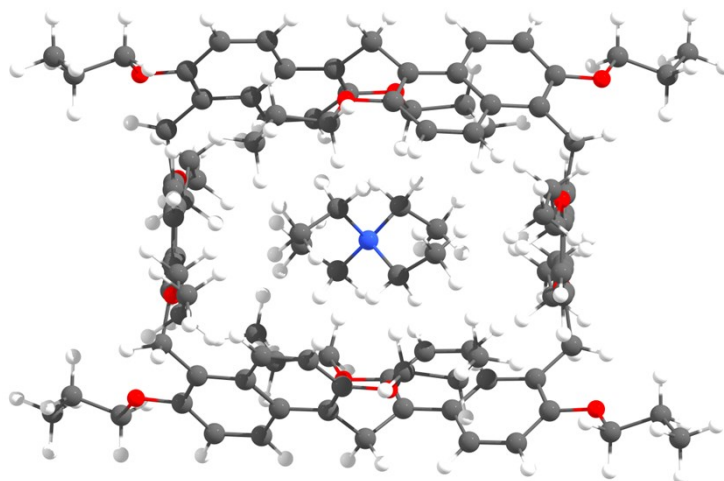

**Figure S80.** DFT-optimized structure (B97D3/SVP/SVPFIT) of the  $6^+ @ \text{PrS}[6]^{nPr}$  complex.

|   |             |             |             |
|---|-------------|-------------|-------------|
| C | -2.42573000 | 4.76421500  | -0.35250000 |
| C | -3.38067500 | 3.92345300  | -1.04651200 |
| C | -4.74849500 | 3.86331800  | -0.62333200 |
| C | -5.17132500 | 4.69923100  | 0.41883500  |
| C | -4.25771400 | 5.58365200  | 1.05236600  |
| C | -2.92605200 | 5.59678200  | 0.68896900  |
| C | -1.04422500 | 4.76711500  | -0.73980600 |
| C | -0.65505000 | 4.02054700  | -1.86178800 |
| C | -1.60487800 | 3.25529400  | -2.59032400 |
| C | -2.92532300 | 3.19051800  | -2.17812500 |
| O | -6.47880100 | 4.60456100  | 0.80367800  |
| C | -6.90540900 | 5.16898500  | 2.04244100  |
| C | -8.31127200 | 4.66186100  | 2.33656700  |
| C | -8.86401200 | 5.21718200  | 3.65173000  |
| O | 0.66995700  | 4.06680600  | -2.20869300 |
| C | 1.10464200  | 3.48872000  | -3.43495300 |
| C | 2.61379500  | 3.65996000  | -3.55078400 |
| C | 3.17965100  | 2.96784400  | -4.79258500 |
| C | 0.00015500  | 5.58779200  | -0.00054700 |
| H | -4.60013000 | 6.25239200  | 1.84615700  |
| H | -2.25246000 | 6.26617100  | 1.22624200  |
| H | -1.30528900 | 2.71635800  | -3.49306100 |
| H | -3.63083300 | 2.59500800  | -2.75974000 |
| H | -6.89374700 | 6.27725400  | 1.98288000  |
| H | -6.20589100 | 4.87087000  | 2.85247200  |
| H | -8.28537100 | 3.55598100  | 2.36141700  |
| H | -8.96823000 | 4.94104100  | 1.49177200  |
| H | -9.88207300 | 4.83765500  | 3.84436800  |
| H | -8.23168800 | 4.92737500  | 4.51190900  |
| H | -8.91761100 | 6.32142200  | 3.63475700  |
| H | 0.58320900  | 3.96993700  | -4.28866600 |
| H | 0.84780400  | 2.40874400  | -3.46694000 |
| H | 3.08810200  | 3.26305200  | -2.63492300 |
| H | 2.85056800  | 4.73789600  | -3.56763400 |
| H | 4.27081100  | 3.11903700  | -4.86545400 |
| H | 2.99608700  | 1.87750200  | -4.76680400 |
| H | 2.72743200  | 3.35992100  | -5.72202300 |
| C | 2.42573300  | -4.76428800 | -0.35203200 |
| C | 3.38067500  | -3.92361000 | -1.04615500 |
| C | 4.74848400  | -3.86337200 | -0.62294700 |
| C | 5.17130900  | -4.69912700 | 0.41934600  |
| C | 4.25771200  | -5.58349000 | 1.05297700  |
| C | 2.92605600  | -5.59670100 | 0.68956200  |
| C | 1.04423400  | -4.76726500 | -0.73935200 |
| C | 0.65506500  | -4.02087100 | -1.86145500 |
| C | 1.60489900  | -3.25574600 | -2.59011500 |

|   |             |             |             |
|---|-------------|-------------|-------------|
| C | 2.92533600  | -3.19088000 | -2.17790200 |
| O | 6.47877700  | -4.60437100 | 0.80420800  |
| C | 6.90535900  | -5.16858400 | 2.04307700  |
| C | 8.31118400  | -4.66134800 | 2.33718600  |
| C | 8.86389300  | -5.21644000 | 3.65246000  |
| O | -0.66993900 | -4.06717100 | -2.20835600 |
| C | -1.10464700 | -3.48918400 | -3.43465000 |
| C | -2.61381400 | -3.66036700 | -3.55037800 |
| C | -3.17972400 | -2.96830700 | -4.79218300 |
| C | -0.00015300 | -5.58785200 | 0.00000400  |
| H | 4.60013300  | -6.25211100 | 1.84686600  |
| H | 2.25246300  | -6.26601600 | 1.22692400  |
| H | 1.30531700  | -2.71698100 | -3.49295600 |
| H | 3.63084300  | -2.59545000 | -2.75960200 |
| H | 6.89375200  | -6.27686300 | 1.98368500  |
| H | 6.20579200  | -4.87037900 | 2.85303200  |
| H | 8.28523100  | -3.55546500 | 2.36186500  |
| H | 8.96819400  | -4.94062700 | 1.49246400  |
| H | 9.88192900  | -4.83683800 | 3.84508300  |
| H | 8.23152000  | -4.92652700 | 4.51256600  |
| H | 8.91754000  | -6.32068000 | 3.63566100  |
| H | -0.58328000 | -3.97051500 | -4.28834000 |
| H | -0.84777600 | -2.40921800 | -3.46678300 |
| H | -3.08801500 | -3.26337200 | -2.63450200 |
| H | -2.85064100 | -4.73829300 | -3.56713500 |
| H | -4.27089400 | -3.11946000 | -4.86497300 |
| H | -2.99611100 | -1.87797100 | -4.76648200 |
| H | -2.72758000 | -3.36046300 | -5.72162400 |
| C | -5.48250700 | 0.72507000  | -0.00984500 |
| C | -5.48259900 | -0.72503200 | 0.00993700  |
| C | -5.51633100 | -1.44514600 | 1.25230500  |
| C | -5.46373100 | -0.71774100 | 2.45078300  |
| C | -5.45824100 | 0.70319500  | 2.43954300  |
| C | -5.49324600 | 1.39924800  | 1.24480900  |
| C | -5.51632100 | 1.44518600  | -1.25220700 |
| C | -5.46394600 | 0.71777800  | -2.45069500 |
| C | -5.45864000 | -0.70315600 | -2.43945600 |
| C | -5.49359800 | -1.39920300 | -1.24471600 |
| O | -5.43511800 | -1.43873600 | 3.61462300  |
| C | -5.27946200 | -0.77706700 | 4.86604300  |
| C | -5.15547500 | -1.83409500 | 5.95554500  |
| C | -4.97795500 | -1.21304800 | 7.34362800  |
| O | -5.43542800 | 1.43877700  | -3.61453300 |
| C | -5.27972400 | 0.77712300  | -4.86595600 |
| C | -5.15558000 | 1.83416200  | -5.95542900 |
| C | -4.97799700 | 1.21312300  | -7.34350800 |
| C | -5.75015600 | 2.95006800  | -1.30568900 |
| H | -5.45207500 | 1.26280700  | 3.37781100  |
| H | -5.53457700 | 2.48546300  | 1.27330900  |
| H | -5.45267400 | -1.26276900 | -3.37772600 |
| H | -5.53511500 | -2.48540700 | -1.27322000 |
| H | -6.15007300 | -0.11641900 | 5.06031400  |
| H | -4.37442200 | -0.13388900 | 4.84454300  |
| H | -4.29928800 | -2.49191500 | 5.71252800  |
| H | -6.05727500 | -2.47363300 | 5.92946400  |
| H | -4.88786500 | -1.99361700 | 8.11828400  |
| H | -4.06824400 | -0.58554100 | 7.39391600  |
| H | -5.83860300 | -0.57368300 | 7.61371300  |
| H | -6.15036700 | 0.11654100  | -5.06031200 |
| H | -4.37473500 | 0.13388000  | -4.84439200 |
| H | -4.29936600 | 2.49191800  | -5.71233500 |
| H | -6.05733700 | 2.47376200  | -5.92940800 |
| H | -4.88779400 | 1.99369700  | -8.11814700 |
| H | -4.06832500 | 0.58555400  | -7.39373400 |



|   |             |             |             |
|---|-------------|-------------|-------------|
| H | -5.83866700 | 0.57382000  | -7.61366800 |
| C | 5.48251200  | -0.72506300 | -0.00980200 |
| C | 5.48257400  | 0.72504000  | 0.00983300  |
| C | 5.51638000  | 1.44528400  | 1.25212300  |
| C | 5.46386700  | 0.71800200  | 2.45068000  |
| C | 5.45840200  | -0.70293500 | 2.43958400  |
| C | 5.49334000  | -1.39911300 | 1.24491800  |
| C | 5.51627700  | -1.44530400 | -1.25209300 |
| C | 5.46383100  | -0.71801700 | -2.45065300 |
| C | 5.45847300  | 0.70291900  | -2.43955600 |
| C | 5.49347000  | 1.39908600  | -1.24488800 |
| O | 5.43534200  | 1.43911300  | 3.61445000  |
| C | 5.27958100  | 0.77758600  | 4.86593200  |
| C | 5.15552200  | 1.83473500  | 5.95530800  |
| C | 4.97790500  | 1.21383900  | 7.34344600  |
| O | 5.43527700  | -1.43912700 | -3.61442200 |
| C | 5.27967900  | -0.77758600 | -4.86591600 |
| C | 5.15561600  | -1.83472300 | -5.95530400 |
| C | 4.97814300  | -1.21380900 | -7.34345300 |
| C | 5.75013200  | -2.95018800 | -1.30541500 |
| H | 5.45231900  | -1.26245000 | 3.37790900  |
| H | 5.53472500  | -2.48532400 | 1.27353000  |
| H | 5.45242500  | 1.26243800  | -3.37788000 |
| H | 5.53493000  | 2.48529100  | -1.27349900 |
| H | 6.15017100  | 0.11695100  | 5.06034600  |
| H | 4.37453900  | 0.13441300  | 4.84443100  |
| H | 4.29935400  | 2.49253200  | 5.71216100  |
| H | 6.05732600  | 2.47426700  | 5.92921900  |
| H | 4.88776600  | 1.99449200  | 8.11801200  |
| H | 4.06818900  | 0.58634100  | 7.39374000  |
| H | 5.83853200  | 0.57450000  | 7.61366100  |
| H | 6.15034400  | -0.11702900 | -5.06025600 |
| H | 4.37469300  | -0.13433300 | -4.84449000 |
| H | 4.29937900  | -2.49245300 | -5.71221700 |
| H | 6.05736800  | -2.47432500 | -5.92915400 |
| H | 4.88800100  | -1.99445300 | -8.11802800 |
| H | 4.06847700  | -0.58624300 | -7.39380800 |
| H | 5.83883700  | -0.57453300 | -7.61360300 |
| C | -3.38088000 | -3.92355200 | 1.04640200  |
| C | -2.42599500 | -4.76421100 | 0.35217900  |
| C | -1.04448100 | -4.76726600 | 0.73944500  |
| C | -0.65524400 | -4.02097300 | 1.86159200  |
| C | -1.60501400 | -3.25584300 | 2.59032700  |
| C | -2.92546300 | -3.19089100 | 2.17816400  |
| C | -4.74871600 | -3.86327900 | 0.62329100  |
| C | -5.17163700 | -4.69902700 | -0.41896900 |
| C | -4.25808000 | -5.58333000 | -1.05274100 |
| C | -2.92639100 | -5.59654200 | -0.68944500 |
| O | 0.66976200  | -4.06741200 | 2.20846900  |
| C | 1.10459000  | -3.48934600 | 3.43467900  |
| C | 2.61376500  | -3.66054700 | 3.55028000  |
| C | 3.17981700  | -2.96839100 | 4.79196700  |
| O | -6.47914600 | -4.60428300 | -0.80368700 |
| C | -6.90588700 | -5.16856900 | -2.04246800 |
| C | -8.31180100 | -4.66145100 | -2.33635800 |
| C | -8.86469200 | -5.21663100 | -3.65151800 |
| C | -5.75026900 | -2.95001600 | 1.30579300  |
| H | -1.30538100 | -2.71715100 | 3.49319300  |
| H | -3.63092200 | -2.59546600 | 2.75992900  |
| H | -4.60055600 | -6.25190500 | -1.84664600 |
| H | -2.25283300 | -6.26580800 | -1.22691100 |
| H | 0.58329700  | -3.97060100 | 4.28845700  |
| H | 0.84772000  | -2.40937900 | 3.46674300  |
| H | 3.08789900  | -3.26369400 | 2.63430600  |

|   |             |             |             |
|---|-------------|-------------|-------------|
| H | 2.85055000  | -4.73848000 | 3.56714000  |
| H | 4.27098100  | -3.11961900 | 4.86468900  |
| H | 2.99628600  | -1.87804400 | 4.76617400  |
| H | 2.72771600  | -3.36041900 | 5.72148300  |
| H | -6.89418200 | -6.27684500 | -1.98304000 |
| H | -6.20647800 | -4.87033500 | -2.85255000 |
| H | -8.28593500 | -3.55556700 | -2.36108100 |
| H | -8.96864500 | -4.94075000 | -1.49151300 |
| H | -9.88278700 | -4.83710700 | -3.84398300 |
| H | -8.23248400 | -4.92670500 | -4.51174100 |
| H | -8.91826000 | -6.32087400 | -3.63466900 |
| C | 3.38091900  | 3.92366300  | 1.04599300  |
| C | 2.42601300  | 4.76422100  | 0.35167800  |
| C | 1.04450500  | 4.76730400  | 0.73896800  |
| C | 0.65528900  | 4.02111600  | 1.86119100  |
| C | 1.60508400  | 3.25611200  | 2.59002400  |
| C | 2.92553300  | 3.19115100  | 2.17786600  |
| C | 4.74874300  | 3.86333700  | 0.62285000  |
| C | 5.17162800  | 4.69893100  | -0.41954800 |
| C | 4.25805300  | 5.58315000  | -1.05341200 |
| C | 2.92637700  | 5.59641400  | -0.69007200 |
| O | -0.66973200 | 4.06748600  | 2.20802800  |
| C | -1.10446600 | 3.48994500  | 3.43452600  |
| C | -2.61362500 | 3.66127300  | 3.55017900  |
| C | -3.17968400 | 2.96935800  | 4.79199700  |
| O | 6.47912100  | 4.60412300  | -0.80430700 |
| C | 6.90578600  | 5.16812500  | -2.04324500 |
| C | 8.31165000  | 4.66087700  | -2.33714700 |
| C | 8.86445800  | 5.21575600  | -3.65246900 |
| C | 5.75031900  | 2.95015900  | 1.30543200  |
| H | 1.30546100  | 2.71752400  | 3.49295600  |
| H | 3.63101600  | 2.59582200  | 2.75970100  |
| H | 4.60050800  | 6.25161700  | -1.84741600 |
| H | 2.25280100  | 6.26560600  | -1.22760900 |
| H | -0.58305700 | 3.97152800  | 4.28804600  |
| H | -0.84765500 | 2.40997400  | 3.46702900  |
| H | -3.08781700 | 3.26429700  | 2.63428900  |
| H | -2.85034400 | 4.73922400  | 3.56686400  |
| H | -4.27082900 | 3.12070900  | 4.86475300  |
| H | -2.99626700 | 1.87898700  | 4.76634800  |
| H | -2.72749700 | 3.36146800  | 5.72143700  |
| H | 6.89414100  | 6.27641500  | -1.98405100 |
| H | 6.20629300  | 4.86975400  | -2.85320300 |
| H | 8.28572800  | 3.55498900  | -2.36163800 |
| H | 8.96858000  | 4.94032000  | -1.49241600 |
| H | 9.88251800  | 4.83614400  | -3.84494100 |
| H | 8.23216400  | 4.92568100  | -4.51257900 |
| H | 8.91807900  | 6.32000000  | -3.63585500 |
| H | -5.82890700 | -3.24139700 | 2.36463700  |
| H | -6.73800500 | -3.14483100 | 0.85837600  |
| H | -6.73783600 | 3.14494900  | -0.85817600 |
| H | -5.82888200 | 3.24143100  | -2.36453200 |
| H | -0.49138000 | 6.24855900  | 0.72670600  |
| H | 0.49171100  | 6.24833800  | -0.72798700 |
| H | 5.82900400  | 3.24166600  | 2.36423800  |
| H | 6.73803600  | 3.14491800  | 0.85794700  |
| H | 6.73781500  | -3.14501000 | -0.85788500 |
| H | 5.82885700  | -3.24166900 | -2.36422500 |
| H | 0.49137700  | -6.24856100 | 0.72731300  |
| H | -0.49173100 | -6.24845700 | -0.72736700 |
| C | -1.89941600 | -0.24664300 | -1.72925600 |
| H | -1.44728800 | 0.36870500  | -2.52231900 |
| H | -2.60843900 | 0.38064700  | -1.16837800 |
| C | -0.86621100 | -0.92650500 | -0.85200000 |

|   |             |             |             |
|---|-------------|-------------|-------------|
| H | -2.50067900 | -1.03443000 | -2.20841500 |
| H | -1.34342600 | -1.62394400 | -0.14770300 |
| H | -0.15651300 | -1.51993600 | -1.44284900 |
| N | -0.00001400 | -0.00003900 | 0.00054600  |
| C | 0.86641800  | -0.92605000 | 0.85332800  |
| C | 0.86604900  | 0.92618500  | -0.85237500 |
| C | -0.86632800 | 0.92620500  | 0.85319400  |
| H | 1.34313400  | 1.62402600  | -0.14838700 |
| C | 1.89939400  | 0.24615400  | -1.72933400 |
| H | 0.15627400  | 1.51923000  | -1.44351800 |
| H | 2.50014900  | 1.03393000  | -2.20914400 |
| H | 2.60882600  | -0.38040400 | -1.16815500 |
| H | 1.44740500  | -0.36995300 | -2.52188200 |
| C | 1.89928300  | -0.24565300 | 1.73056500  |
| H | 0.15689300  | -1.51961500 | 1.44424700  |
| H | 1.34393100  | -1.62345800 | 0.14919900  |
| H | 2.50070600  | -1.03309500 | 2.21008900  |
| H | 2.60819200  | 0.38171600  | 1.16963400  |
| H | 1.44681900  | 0.36977700  | 2.52337100  |
| H | -0.15672900 | 1.51979900  | 1.44399000  |
| H | -1.34379200 | 1.62355100  | 0.14897100  |
| C | -1.89924500 | 0.24606600  | 1.73056800  |
| H | -2.50038600 | 1.03367200  | 2.21017600  |
| H | -2.60839700 | -0.38110700 | 1.16972400  |
| H | -1.44683500 | -0.36948300 | 2.52331400  |

1 2 1.0 6 1.5 7 1.5  
2 3 1.5 10 1.5  
3 4 1.5 93 1.0  
4 5 1.5 11 1.0  
5 6 2.0 20 1.0  
6 21 1.0  
7 8 1.5 19 1.0  
8 9 1.5 15 1.0  
9 10 2.0 22 1.0  
10 23 1.0  
11 12 1.0  
12 13 1.0 24 1.0 25 1.0  
13 14 1.0 26 1.0 27 1.0  
14 28 1.0 29 1.0 30 1.0  
15 16 1.0  
16 17 1.0 31 1.0 32 1.0  
17 18 1.0 33 1.0 34 1.0  
18 35 1.0 36 1.0 37 1.0  
19 188 1.0 227 1.0 228 1.0  
20  
21  
22  
23  
24  
25  
26  
27  
28  
29  
30  
31  
32  
33  
34  
35  
36  
37  
38 39 1.0 43 1.5 44 1.5

39 40 1.5 47 1.5  
40 41 1.5 130 1.0  
41 42 1.5 48 1.0  
42 43 2.0 57 1.0  
43 58 1.0  
44 45 1.5 56 1.0  
45 46 1.5 52 1.0  
46 47 2.0 59 1.0  
47 60 1.0  
48 49 1.0  
49 50 1.0 61 1.0 62 1.0  
50 51 1.0 63 1.0 64 1.0  
51 65 1.0 66 1.0 67 1.0  
52 53 1.0  
53 54 1.0 68 1.0 69 1.0  
54 55 1.0 70 1.0 71 1.0  
55 72 1.0 73 1.0 74 1.0  
56 151 1.0 233 1.0 234 1.0  
57  
58  
59  
60  
61  
62  
63  
64  
65  
66  
67  
68  
69  
70  
71  
72  
73  
74  
75 76 1.0 80 1.5 81 1.5  
76 77 1.5 84 1.5  
77 78 1.5 167 1.0  
78 79 1.5 85 1.0  
79 80 2.0 94 1.0  
80 95 1.0  
81 82 1.5 93 1.0  
82 83 1.5 89 1.0  
83 84 2.0 96 1.0  
84 97 1.0  
85 86 1.0  
86 87 1.0 98 1.0 99 1.0  
87 88 1.0 100 1.0 101 1.0  
88 102 1.0 103 1.0 104 1.0  
89 90 1.0  
90 91 1.0 105 1.0 106 1.0  
91 92 1.0 107 1.0 108 1.0  
92 109 1.0 110 1.0 111 1.0  
93 225 1.0 226 1.0  
94  
95  
96  
97  
98  
99  
100  
101  
102

103  
104  
105  
106  
107  
108  
109  
110  
111  
112 113 1.0 117 1.5 118 1.5  
113 114 1.5 121 1.5  
114 115 1.5 204 1.0  
115 116 1.5 122 1.0  
116 117 2.0 131 1.0  
117 132 1.0  
118 119 1.5 130 1.0  
119 120 1.5 126 1.0  
120 121 2.0 133 1.0  
121 134 1.0  
122 123 1.0  
123 124 1.0 135 1.0 136 1.0  
124 125 1.0 137 1.0 138 1.0  
125 139 1.0 140 1.0 141 1.0  
126 127 1.0  
127 128 1.0 142 1.0 143 1.0  
128 129 1.0 144 1.0 145 1.0  
129 146 1.0 147 1.0 148 1.0  
130 231 1.0 232 1.0  
131  
132  
133  
134  
135  
136  
137  
138  
139  
140  
141  
142  
143  
144  
145  
146  
147  
148  
149 150 1.0 154 1.5 155 1.5  
150 151 1.5 158 1.5  
151 152 1.5  
152 153 1.5 159 1.0  
153 154 2.0 168 1.0  
154 169 1.0  
155 156 1.5 167 1.0  
156 157 1.5 163 1.0  
157 158 2.0 170 1.0  
158 171 1.0  
159 160 1.0  
160 161 1.0 172 1.0 173 1.0  
161 162 1.0 174 1.0 175 1.0  
162 176 1.0 177 1.0 178 1.0  
163 164 1.0  
164 165 1.0 179 1.0 180 1.0  
165 166 1.0 181 1.0 182 1.0  
166 183 1.0 184 1.0 185 1.0

167 223 1.0 224 1.0  
168  
169  
170  
171  
172  
173  
174  
175  
176  
177  
178  
179  
180  
181  
182  
183  
184  
185  
186 187 1.0 191 1.5 192 1.5  
187 188 1.5 195 1.5  
188 189 1.5  
189 190 1.5 196 1.0  
190 191 2.0 205 1.0  
191 206 1.0  
192 193 1.5 204 1.0  
193 194 1.5 200 1.0  
194 195 2.0 207 1.0  
195 208 1.0  
196 197 1.0  
197 198 1.0 209 1.0 210 1.0  
198 199 1.0 211 1.0 212 1.0  
199 213 1.0 214 1.0 215 1.0  
200 201 1.0  
201 202 1.0 216 1.0 217 1.0  
202 203 1.0 218 1.0 219 1.0  
203 220 1.0 221 1.0 222 1.0  
204 229 1.0 230 1.0  
205  
206  
207  
208  
209  
210  
211  
212  
213  
214  
215  
216  
217  
218  
219  
220  
221  
222  
223  
224  
225  
226  
227  
228  
229  
230

231  
 232  
 233  
 234  
 235 236 1.0 237 1.0 238 1.0 239 1.0  
 236  
 237  
 238 240 1.0 241 1.0 242 1.0  
 239  
 240  
 241  
 242 243 1.0 244 1.0 245 1.0  
 243 252 1.0 253 1.0 254 1.0  
 244 246 1.0 247 1.0 248 1.0  
 245 258 1.0 259 1.0 260 1.0  
 246  
 247 249 1.0 250 1.0 251 1.0  
 248  
 249  
 250  
 251  
 252 255 1.0 256 1.0 257 1.0  
 253  
 254  
 255  
 256  
 257  
 258  
 259  
 260 261 1.0 262 1.0 263 1.0  
 261  
 262  
 263

---

0 imaginary frequency

Atomic coordinates of  $7^{2+}@PrS[6]^{nPr}$  complex

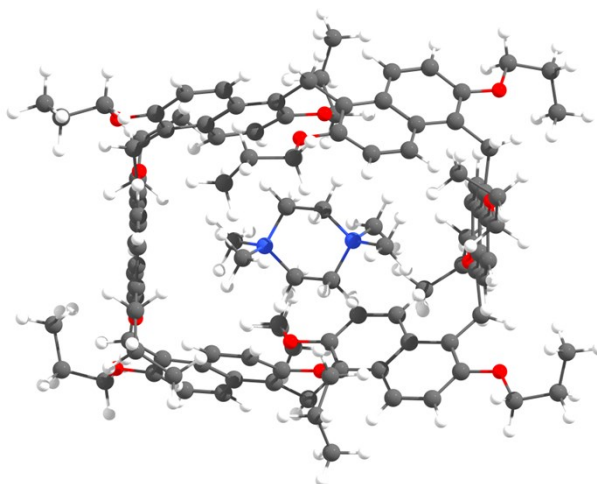

**Figure S81.** DFT-optimized structure (B97D3/SVP/SVPFIT) of the  $7^{2+}@PrS[6]^{nPr}$  complex.

|   |            |            |             |
|---|------------|------------|-------------|
| C | 2.05588400 | 4.71380900 | -0.00270700 |
| C | 3.11276200 | 4.01664900 | 0.70669800  |
| C | 4.46371600 | 4.04381600 | 0.23022100  |
| C | 4.76453900 | 4.81395500 | -0.90462300 |
| C | 3.74393800 | 5.54482900 | -1.57141400 |
| C | 2.43400700 | 5.48321200 | -1.13949800 |

|   |             |             |             |
|---|-------------|-------------|-------------|
| C | 0.69856400  | 4.65134200  | 0.46823100  |
| C | 0.42613900  | 3.94468800  | 1.64871600  |
| C | 1.47154800  | 3.33116900  | 2.39059800  |
| C | 2.77424400  | 3.35661600  | 1.92443200  |
| O | 6.05413900  | 4.80264300  | -1.33446400 |
| C | 6.44776600  | 5.53311200  | -2.50237000 |
| C | 7.92736100  | 5.27315300  | -2.74821200 |
| C | 8.44530800  | 6.01470700  | -3.98370900 |
| O | -0.89172300 | 3.83357100  | 2.00820200  |
| C | -1.26774700 | 3.53550300  | 3.35790800  |
| C | -0.86012000 | 4.60063800  | 4.37736400  |
| C | -1.36205600 | 6.00715800  | 4.04384000  |
| C | -0.42598100 | 5.41339600  | -0.22004000 |
| H | 3.98679700  | 6.15720700  | -2.44299700 |
| H | 1.68125300  | 6.03946300  | -1.69901500 |
| H | 1.25826800  | 2.83462300  | 3.34157800  |
| H | 3.55863900  | 2.89530500  | 2.52602200  |
| H | 6.25677300  | 6.61431900  | -2.34833700 |
| H | 5.84159500  | 5.20308500  | -3.37198400 |
| H | 8.07934600  | 4.18240000  | -2.85714100 |
| H | 8.49112300  | 5.58026500  | -1.84785800 |
| H | 9.51794300  | 5.81219600  | -4.14199800 |
| H | 7.90825500  | 5.70430400  | -4.89925300 |
| H | 8.32510500  | 7.10848000  | -3.87932600 |
| H | -0.87526200 | 2.53864900  | 3.65455100  |
| H | -2.36789600 | 3.45582800  | 3.30433400  |
| H | 0.23958100  | 4.61428000  | 4.48959800  |
| H | -1.26134800 | 4.27266100  | 5.35609800  |
| H | -1.09158000 | 6.71899800  | 4.84191600  |
| H | -0.91558300 | 6.37748600  | 3.10480600  |
| H | -2.46088100 | 6.02703300  | 3.93013100  |
| C | -2.11077400 | -4.64921200 | 0.17694000  |
| C | -3.16388400 | -3.90403400 | 0.84054800  |
| C | -4.51227200 | -3.93429100 | 0.35271900  |
| C | -4.80608500 | -4.72642000 | -0.76889400 |
| C | -3.77674200 | -5.45652100 | -1.42667100 |
| C | -2.47476000 | -5.41267800 | -0.96891100 |
| C | -0.77051100 | -4.63321000 | 0.69570900  |
| C | -0.50243000 | -3.89560700 | 1.85760000  |
| C | -1.53266900 | -3.17842100 | 2.52082900  |
| C | -2.82531800 | -3.18665400 | 2.02501900  |
| O | -6.09723600 | -4.74358500 | -1.19431100 |
| C | -6.49491600 | -5.54950400 | -2.31346900 |
| C | -7.98396400 | -5.34221300 | -2.55247900 |
| C | -8.36221900 | -3.91182600 | -2.94745700 |
| O | 0.80187900  | -3.86765700 | 2.27538300  |
| C | 1.13901900  | -3.49658900 | 3.61367200  |
| C | 0.70077200  | -4.52398400 | 4.65542000  |
| C | 1.08755100  | -4.10393900 | 6.07591000  |
| C | 0.35531500  | -5.44461600 | 0.07197400  |
| H | -4.00982600 | -6.07088500 | -2.29979700 |
| H | -1.71930600 | -5.98470500 | -1.50563400 |
| H | -1.32670600 | -2.64412800 | 3.45265300  |
| H | -3.60264500 | -2.66927500 | 2.58702600  |
| H | -6.27281300 | -6.61268900 | -2.09607800 |
| H | -5.91128900 | -5.25032600 | -3.20912800 |
| H | -8.53300600 | -5.64865800 | -1.64243600 |
| H | -8.28283400 | -6.05035000 | -3.34837400 |
| H | -9.44077800 | -3.83665900 | -3.16829500 |
| H | -8.13319800 | -3.19564800 | -2.14033500 |
| H | -7.81227700 | -3.58924100 | -3.85225400 |
| H | 0.73153400  | -2.49066800 | 3.85502200  |
| H | 2.23963800  | -3.40690000 | 3.59747200  |
| H | 1.16362300  | -5.49472300 | 4.39695400  |



|   |             |             |             |
|---|-------------|-------------|-------------|
| H | -0.39270900 | -4.67319700 | 4.58806000  |
| H | 0.78717000  | -4.87012100 | 6.81018800  |
| H | 2.17935100  | -3.95875400 | 6.17357400  |
| H | 0.59558400  | -3.15622300 | 6.36501100  |
| C | 5.61523500  | 0.95980000  | -0.04670400 |
| C | 5.76693600  | -0.47498500 | 0.10377400  |
| C | 5.89202900  | -1.33029200 | -1.04336900 |
| C | 5.83781700  | -0.75300900 | -2.32252700 |
| C | 5.68879100  | 0.65313200  | -2.47570200 |
| C | 5.59641700  | 1.48236500  | -1.37187400 |
| C | 5.53859300  | 1.81963000  | 1.10219400  |
| C | 5.56156600  | 1.23837400  | 2.38161000  |
| C | 5.72142400  | -0.16680900 | 2.53505600  |
| C | 5.84074600  | -0.99086200 | 1.42975400  |
| O | 5.93792000  | -1.59645900 | -3.39144100 |
| C | 5.93448000  | -1.08289000 | -4.72810200 |
| C | 6.02475200  | -2.25045200 | -5.70145400 |
| C | 4.82412900  | -3.20057800 | -5.66116800 |
| O | 5.43582100  | 2.08099100  | 3.44827500  |
| C | 5.49821300  | 1.57799000  | 4.78726000  |
| C | 5.28133500  | 2.73481800  | 5.75342100  |
| C | 3.90149500  | 3.39185300  | 5.64946600  |
| C | 5.58468900  | 3.33677400  | 0.97309200  |
| H | 5.67818400  | 1.09915100  | -3.47295300 |
| H | 5.53824500  | 2.55732800  | -1.53082400 |
| H | 5.79638500  | -0.60834400 | 3.53184700  |
| H | 6.02744200  | -2.05065900 | 1.59147500  |
| H | 6.79202700  | -0.39397100 | -4.86035200 |
| H | 5.00130900  | -0.50508500 | -4.90133500 |
| H | 6.96031200  | -2.80544400 | -5.50179600 |
| H | 6.13192300  | -1.81625900 | -6.71351800 |
| H | 4.90583600  | -3.97147500 | -6.44658700 |
| H | 4.75010800  | -3.71968300 | -4.69075500 |
| H | 3.87606600  | -2.65314500 | -5.82764200 |
| H | 6.48384600  | 1.10149300  | 4.95737600  |
| H | 4.71471800  | 0.80297100  | 4.92953700  |
| H | 6.07671100  | 3.48574700  | 5.59032200  |
| H | 5.43680400  | 2.33492400  | 6.77327700  |
| H | 3.75852500  | 3.87964900  | 4.67056100  |
| H | 3.09320500  | 2.64612000  | 5.78006200  |
| H | 3.77264100  | 4.16228700  | 6.42904800  |
| C | -5.72227400 | -0.88677500 | -0.04346300 |
| C | -5.83033300 | 0.55653300  | 0.04222900  |
| C | -6.01781200 | 1.35444500  | -1.13661400 |
| C | -6.05325100 | 0.71345200  | -2.38648700 |
| C | -5.95842200 | -0.70297500 | -2.47546700 |
| C | -5.81427900 | -1.47706100 | -1.33679200 |
| C | -5.58674600 | -1.68897900 | 1.14095800  |
| C | -5.53393900 | -1.04604900 | 2.38897400  |
| C | -5.63919000 | 0.36946300  | 2.47876100  |
| C | -5.79935400 | 1.14031500  | 1.34168200  |
| O | -6.19035800 | 1.50863400  | -3.48619000 |
| C | -6.28549200 | 0.93583500  | -4.79500100 |
| C | -6.38770500 | 2.06385600  | -5.81261900 |
| C | -5.15573600 | 2.97199100  | -5.86858400 |
| O | -5.38678900 | -1.83799400 | 3.49241300  |
| C | -5.38885600 | -1.26668300 | 4.80542900  |
| C | -5.18776700 | -2.38024900 | 5.82457900  |
| C | -3.83398800 | -3.09027700 | 5.72649000  |
| C | -5.63446500 | -3.21027000 | 1.07992000  |
| H | -6.03978600 | -1.20165800 | -3.44440500 |
| H | -5.80800100 | -2.56041000 | -1.44301200 |
| H | -5.63876100 | 0.86286400  | 3.45375600  |
| H | -5.93870700 | 2.21228500  | 1.45831000  |

|   |             |             |             |
|---|-------------|-------------|-------------|
| H | -7.17412700 | 0.27597800  | -4.84559500 |
| H | -5.38603600 | 0.31465400  | -4.99427000 |
| H | -7.29342900 | 2.65867900  | -5.59110800 |
| H | -6.55935500 | 1.59276500  | -6.79895700 |
| H | -5.01482300 | 3.52153200  | -4.92244400 |
| H | -4.23629700 | 2.38615800  | -6.06227500 |
| H | -5.25210200 | 3.71760000  | -6.67635200 |
| H | -6.35035500 | -0.74429000 | 4.97842700  |
| H | -4.57288900 | -0.51677000 | 4.88550800  |
| H | -6.01167900 | -3.11018900 | 5.71760800  |
| H | -5.30604300 | -1.92383100 | 6.82553600  |
| H | -3.71482800 | -3.82473600 | 6.54162000  |
| H | -3.72894800 | -3.63097300 | 4.77100900  |
| H | -2.99766400 | -2.36816300 | 5.80308500  |
| C | 3.81606000  | -3.81340300 | -0.76305600 |
| C | 2.79101300  | -4.56515700 | -0.06596600 |
| C | 1.46162000  | -4.65067000 | -0.60776400 |
| C | 1.18896800  | -4.02802200 | -1.83460000 |
| C | 2.21255100  | -3.36500800 | -2.56041000 |
| C | 3.48861200  | -3.26011900 | -2.03535500 |
| C | 5.12905200  | -3.66462500 | -0.20863900 |
| C | 5.44170500  | -4.34512300 | 0.97837500  |
| C | 4.45774600  | -5.13397500 | 1.63743700  |
| C | 3.17300000  | -5.22440600 | 1.13761100  |
| O | -0.11118600 | -4.06522100 | -2.27227400 |
| C | -0.41170100 | -3.98770600 | -3.67330400 |
| C | 0.15940900  | -5.14143700 | -4.49757000 |
| C | -0.26188500 | -6.52632500 | -4.00107900 |
| O | 6.69987600  | -4.18689200 | 1.46899600  |
| C | 7.09976400  | -4.82126500 | 2.69197900  |
| C | 8.52484900  | -4.39244300 | 3.01255400  |
| C | 8.68097700  | -2.89220600 | 3.27724800  |
| C | 6.18607000  | -2.81884300 | -0.89954200 |
| H | 2.00567200  | -2.93685200 | -3.54542100 |
| H | 4.25869000  | -2.76070300 | -2.62418300 |
| H | 4.70950400  | -5.67536700 | 2.55260700  |
| H | 2.44566200  | -5.82091100 | 1.68933400  |
| H | -0.08287900 | -3.00962800 | -4.08430700 |
| H | -1.51569200 | -4.00487200 | -3.69957500 |
| H | 1.26252900  | -5.07165800 | -4.52436600 |
| H | -0.18076200 | -4.98746200 | -5.53996400 |
| H | 0.12331300  | -7.31652100 | -4.66735500 |
| H | 0.13333500  | -6.72582700 | -2.99003500 |
| H | -1.36228800 | -6.62436200 | -3.96324000 |
| H | 7.03335800  | -5.92075000 | 2.57430100  |
| H | 6.40912500  | -4.51864200 | 3.50697000  |
| H | 9.18303700  | -4.70740800 | 2.18124900  |
| H | 8.84441600  | -4.97295300 | 3.89860100  |
| H | 9.71887600  | -2.64799900 | 3.56156500  |
| H | 8.42719200  | -2.29606500 | 2.38435000  |
| H | 8.02132900  | -2.56165500 | 4.10233200  |
| C | -3.91034000 | 3.80818300  | -0.98197700 |
| C | -2.86899100 | 4.57227000  | -0.32595300 |
| C | -1.53774800 | 4.60222900  | -0.86686600 |
| C | -1.28199600 | 3.92859700  | -2.07100600 |
| C | -2.32625300 | 3.26307500  | -2.76880400 |
| C | -3.59895000 | 3.19166300  | -2.22798300 |
| C | -5.22333600 | 3.71668100  | -0.41789700 |
| C | -5.52048400 | 4.46226900  | 0.73272300  |
| C | -4.52012500 | 5.26547200  | 1.34711600  |
| C | -3.23538100 | 5.30061500  | 0.84155300  |
| O | 0.01578600  | 3.92034900  | -2.51910000 |
| C | 0.28439100  | 3.53669500  | -3.87106100 |
| C | 1.77270700  | 3.69293600  | -4.15025800 |

|   |             |             |             |
|---|-------------|-------------|-------------|
| C | 2.66164500  | 2.74755200  | -3.34110800 |
| O | -6.77770000 | 4.34547100  | 1.23694900  |
| C | -7.14894700 | 5.00975100  | 2.45221600  |
| C | -8.55927700 | 4.57336900  | 2.82430800  |
| C | -8.68551000 | 3.07867400  | 3.13312000  |
| C | -6.29503100 | 2.85024400  | -1.05421500 |
| H | -2.14124000 | 2.80311900  | -3.74294500 |
| H | -4.38292300 | 2.68599300  | -2.79422100 |
| H | -4.75787100 | 5.86040900  | 2.23244200  |
| H | -2.49684600 | 5.90906000  | 1.36126700  |
| H | -0.31740900 | 4.16171100  | -4.55986500 |
| H | -0.01803700 | 2.47798300  | -4.03286700 |
| H | 2.06085500  | 4.74148600  | -3.95879300 |
| H | 1.92069600  | 3.52044000  | -5.23301400 |
| H | 3.72834300  | 2.91732700  | -3.56104800 |
| H | 2.52807000  | 2.90463400  | -2.25798700 |
| H | 2.43970500  | 1.68945800  | -3.57903500 |
| H | -7.09763000 | 6.10643300  | 2.30338500  |
| H | -6.43288300 | 4.73679300  | 3.25567700  |
| H | -9.24387800 | 4.85612400  | 2.00279600  |
| H | -8.86318900 | 5.17373400  | 3.70258700  |
| H | -9.71382200 | 2.82486400  | 3.44288100  |
| H | -8.43610500 | 2.46291100  | 2.25227200  |
| H | -8.00529800 | 2.78208000  | 3.95438600  |
| H | 6.37396100  | -3.22736800 | -1.90447700 |
| H | 7.12843700  | -2.93145200 | -0.34134000 |
| H | 6.53091800  | 3.59711600  | 0.47322300  |
| H | 5.64763000  | 3.75758300  | 1.98870400  |
| H | -0.00126600 | 6.06154500  | -0.99793100 |
| H | -0.86300000 | 6.09448100  | 0.52395200  |
| H | -6.49905200 | 3.21587600  | -2.07237800 |
| H | -7.22720700 | 2.99236400  | -0.48491300 |
| H | -6.58393600 | -3.50079100 | 0.60406300  |
| H | -5.67950700 | -3.58735100 | 2.11346000  |
| H | -0.06279500 | -6.14092400 | -0.66768300 |
| H | 0.78905800  | -6.07236600 | 0.86288300  |
| C | -0.69979700 | -1.34563600 | -0.51788900 |
| N | -1.51957000 | -0.06685100 | -0.47386500 |
| C | -0.58203800 | 1.09847300  | -0.72411600 |
| C | 0.61250100  | 1.12102100  | 0.20643100  |
| N | 1.43878700  | -0.14801400 | 0.17368600  |
| C | 0.50584000  | -1.32458000 | 0.39761000  |
| H | -0.41168700 | -1.50345100 | -1.56660300 |
| H | -1.34868300 | -2.18603900 | -0.23007400 |
| H | -1.14440200 | 2.03476400  | -0.58897500 |
| H | -0.28206600 | 1.04823800  | -1.78027600 |
| H | 1.26069900  | 1.96612500  | -0.06709900 |
| H | 0.30831300  | 1.27668200  | 1.24851100  |
| H | 0.19984800  | -1.28078600 | 1.45111300  |
| H | 1.07685300  | -2.25539300 | 0.25880600  |
| C | -2.25532200 | 0.10490400  | 0.83509100  |
| H | -2.79800800 | 1.05995800  | 0.79657100  |
| H | -2.96487100 | -0.72625700 | 0.94847000  |
| H | -1.54368600 | 0.10147600  | 1.66920300  |
| C | -2.56021500 | -0.13144000 | -1.56630800 |
| H | -3.15665000 | 0.79043100  | -1.53835100 |
| H | -2.04760200 | -0.22163200 | -2.53436200 |
| H | -3.20393400 | -1.00220300 | -1.38035900 |
| C | 2.20846200  | -0.25663100 | -1.11648100 |
| H | 2.80204800  | -1.17900100 | -1.09305300 |
| H | 1.51439500  | -0.29170700 | -1.96457100 |
| H | 2.87192200  | 0.61531200  | -1.19706700 |
| C | 2.44771600  | -0.12808700 | 1.29738800  |
| H | 3.00945800  | -1.07131500 | 1.27000400  |

H 3.12966700 0.71917800 1.14536800  
H 1.91200700 -0.01750900 2.25017700

1 2 1.0 6 1.5 7 1.5  
2 3 1.5 10 1.5  
3 4 1.5 93 1.0  
4 5 1.5 11 1.0  
5 6 2.0 20 1.0  
6 21 1.0  
7 8 1.5 19 1.0  
8 9 1.5 15 1.0  
9 10 2.0 22 1.0  
10 23 1.0  
11 12 1.0  
12 13 1.0 24 1.0 25 1.0  
13 14 1.0 26 1.0 27 1.0  
14 28 1.0 29 1.0 30 1.0  
15 16 1.0  
16 17 1.0 31 1.0 32 1.0  
17 18 1.0 33 1.0 34 1.0  
18 35 1.0 36 1.0 37 1.0  
19 188 1.0 227 1.0 228 1.0  
20  
21  
22  
23  
24  
25  
26  
27  
28  
29  
30  
31  
32  
33  
34  
35  
36  
37  
38 39 1.0 43 1.5 44 1.5  
39 40 1.5 47 1.5  
40 41 1.5 130 1.0  
41 42 1.5 48 1.0  
42 43 2.0 57 1.0  
43 58 1.0  
44 45 1.5 56 1.0  
45 46 1.5 52 1.0  
46 47 2.0 59 1.0  
47 60 1.0  
48 49 1.0  
49 50 1.0 61 1.0 62 1.0  
50 51 1.0 63 1.0 64 1.0  
51 65 1.0 66 1.0 67 1.0  
52 53 1.0  
53 54 1.0 68 1.0 69 1.0  
54 55 1.0 70 1.0 71 1.0  
55 72 1.0 73 1.0 74 1.0  
56 151 1.0 233 1.0 234 1.0  
57  
58  
59  
60  
61

62  
63  
64  
65  
66  
67  
68  
69  
70  
71  
72  
73  
74  
75 76 1.0 80 1.5 81 1.5  
76 77 1.5 84 1.5  
77 78 1.5 167 1.0  
78 79 1.5 85 1.0  
79 80 2.0 94 1.0  
80 95 1.0  
81 82 1.5 93 1.0  
82 83 1.5 89 1.0  
83 84 2.0 96 1.0  
84 97 1.0  
85 86 1.0  
86 87 1.0 98 1.0 99 1.0  
87 88 1.0 100 1.0 101 1.0  
88 102 1.0 103 1.0 104 1.0  
89 90 1.0  
90 91 1.0 105 1.0 106 1.0  
91 92 1.0 107 1.0 108 1.0  
92 109 1.0 110 1.0 111 1.0  
93 225 1.0 226 1.0  
94  
95  
96  
97  
98  
99  
100  
101  
102  
103  
104  
105  
106  
107  
108  
109  
110  
111  
112 113 1.0 117 1.5 118 1.5  
113 114 1.5 121 1.5  
114 115 1.5 204 1.0  
115 116 1.5 122 1.0  
116 117 2.0 131 1.0  
117 132 1.0  
118 119 1.5 130 1.0  
119 120 1.5 126 1.0  
120 121 2.0 133 1.0  
121 134 1.0  
122 123 1.0  
123 124 1.0 135 1.0 136 1.0  
124 125 1.0 137 1.0 138 1.0  
125 139 1.0 140 1.0 141 1.0

126 127 1.0  
127 128 1.0 142 1.0 143 1.0  
128 129 1.0 144 1.0 145 1.0  
129 146 1.0 147 1.0 148 1.0  
130 231 1.0 232 1.0  
131  
132  
133  
134  
135  
136  
137  
138  
139  
140  
141  
142  
143  
144  
145  
146  
147  
148  
149 150 1.0 154 1.5 155 1.5  
150 151 1.5 158 1.5  
151 152 1.5  
152 153 1.5 159 1.0  
153 154 2.0 168 1.0  
154 169 1.0  
155 156 1.5 167 1.0  
156 157 1.5 163 1.0  
157 158 2.0 170 1.0  
158 171 1.0  
159 160 1.0  
160 161 1.0 172 1.0 173 1.0  
161 162 1.0 174 1.0 175 1.0  
162 176 1.0 177 1.0 178 1.0  
163 164 1.0  
164 165 1.0 179 1.0 180 1.0  
165 166 1.0 181 1.0 182 1.0  
166 183 1.0 184 1.0 185 1.0  
167 223 1.0 224 1.0  
168  
169  
170  
171  
172  
173  
174  
175  
176  
177  
178  
179  
180  
181  
182  
183  
184  
185  
186 187 1.0 191 1.5 192 1.5  
187 188 1.5 195 1.5  
188 189 1.5  
189 190 1.5 196 1.0

190 191 2.0 205 1.0  
191 206 1.0  
192 193 1.5 204 1.0  
193 194 1.5 200 1.0  
194 195 2.0 207 1.0  
195 208 1.0  
196 197 1.0  
197 198 1.0 209 1.0 210 1.0  
198 199 1.0 211 1.0 212 1.0  
199 213 1.0 214 1.0 215 1.0  
200 201 1.0  
201 202 1.0 216 1.0 217 1.0  
202 203 1.0 218 1.0 219 1.0  
203 220 1.0 221 1.0 222 1.0  
204 229 1.0 230 1.0  
205  
206  
207  
208  
209  
210  
211  
212  
213  
214  
215  
216  
217  
218  
219  
220  
221  
222  
223  
224  
225  
226  
227  
228  
229  
230  
231  
232  
233  
234  
235 236 1.0 240 1.0 241 1.0 242 1.0  
236 237 1.0 249 1.0 253 1.0  
237 238 1.0 243 1.0 244 1.0  
238 239 1.0 245 1.0 246 1.0  
239 240 1.0 257 1.0 261 1.0  
240 247 1.0 248 1.0  
241  
242  
243  
244  
245  
246  
247  
248  
249 250 1.0 251 1.0 252 1.0  
250  
251  
252  
253 254 1.0 255 1.0 256 1.0

254  
255  
256  
257 258 1.0 259 1.0 260 1.0  
258  
259  
260  
261 262 1.0 263 1.0 264 1.0  
262  
263  
264

---

0 imaginary frequency

Atomic coordinates of  $5^{2+}@PrS[6]^{nPr}$  complex.

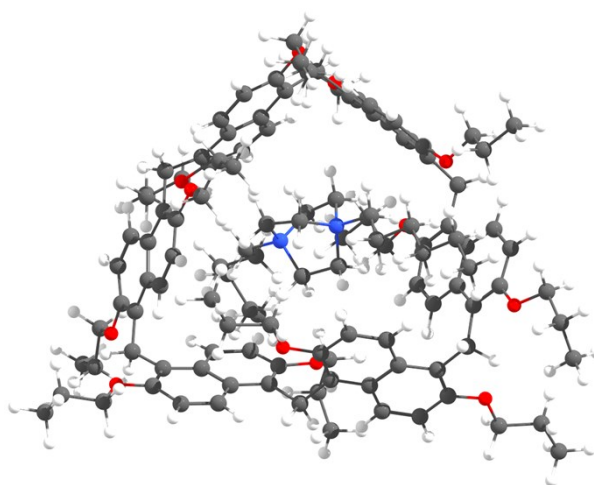

**Figure S82.** DFT-optimized structure (B97D3/SVP/SVPFIT) of the  $5^{2+}@PrS[6]^{nPr}$  complex.

|   |            |             |             |
|---|------------|-------------|-------------|
| C | 6.69271700 | 0.87117800  | -0.79327300 |
| C | 6.10713600 | -1.91643300 | -0.67972600 |
| C | 7.28874600 | -1.39020900 | -0.12323800 |
| C | 7.58658000 | -0.00615200 | -0.21117300 |
| H | 6.95705000 | 1.92664200  | -0.82780300 |
| H | 8.52923100 | 0.37840600  | 0.18529800  |
| C | 5.45593800 | 0.42849800  | -1.33599000 |
| C | 5.19551300 | -1.00843300 | -1.32347900 |
| C | 4.03873000 | -1.45080400 | -2.02840300 |
| C | 3.15775500 | -0.56773900 | -2.62229200 |
| C | 3.35779300 | 0.83494900  | -2.52825700 |
| C | 4.50795500 | 1.35280900  | -1.91449800 |
| H | 3.83804100 | -2.51295100 | -2.12776000 |
| H | 2.30740800 | -0.97718600 | -3.17235800 |
| H | 5.82421300 | 3.05566600  | -1.76713200 |
| H | 4.57047600 | 3.19873700  | -2.98365000 |
| C | 5.99466800 | -3.44108600 | -0.58336700 |
| H | 6.22705900 | -3.71316200 | 0.46177200  |
| H | 6.83801400 | -3.85624000 | -1.16007400 |
| O | 2.43265800 | 1.72732500  | -3.02565900 |
| O | 8.11773500 | -2.27937000 | 0.48003900  |
| C | 1.36638800 | 1.23422800  | -3.83436300 |
| H | 1.77310200 | 0.69778100  | -4.71527600 |
| H | 0.76585500 | 0.48990300  | -3.26348000 |
| C | 9.46331900 | -1.91305800 | 0.82384800  |



|   |             |             |             |
|---|-------------|-------------|-------------|
| H | 9.94663600  | -1.44031400 | -0.05470100 |
| H | 9.44811200  | -1.17567900 | 1.65033700  |
| C | 2.34311900  | -5.33710400 | -1.95205400 |
| C | 4.73562800  | -4.14709300 | -1.01412000 |
| C | 4.70290700  | -4.79495500 | -2.25750100 |
| C | 3.49491500  | -5.39424900 | -2.71549600 |
| H | 1.43500900  | -5.77935600 | -2.36229300 |
| H | 3.46008900  | -5.88842600 | -3.68976300 |
| C | 3.55866200  | -4.13281900 | -0.19898200 |
| C | 2.31857700  | -4.71506900 | -0.66930000 |
| C | 1.13527900  | -4.65632500 | 0.14131600  |
| C | 1.19458500  | -3.99753000 | 1.37826300  |
| C | 2.41763900  | -3.46226400 | 1.86081400  |
| C | 3.56527300  | -3.53071000 | 1.08679300  |
| H | 2.47517000  | -3.01772700 | 2.85719700  |
| O | 5.83760200  | -4.75708300 | -2.99851300 |
| O | 0.02544900  | -3.91496800 | 2.09256500  |
| C | -0.13552200 | -5.39234200 | -0.24404000 |
| H | -0.28952700 | -6.18285300 | 0.50518400  |
| H | 0.02806300  | -5.92267900 | -1.19235700 |
| C | -3.83818100 | -3.21030400 | -0.92664000 |
| C | -2.72648200 | -2.99989500 | -1.72377300 |
| C | -1.50453700 | -3.66628500 | -1.44635600 |
| C | -1.41071200 | -4.58457200 | -0.39616700 |
| H | -4.77729200 | -2.71094700 | -1.17380100 |
| H | -2.80642200 | -2.34147500 | -2.58899700 |
| C | -3.78895300 | -4.07883700 | 0.20100900  |
| C | -2.55565100 | -4.79949000 | 0.44528300  |
| C | -2.54567900 | -5.72378900 | 1.52717000  |
| C | -3.64989400 | -5.90603400 | 2.33804600  |
| C | -4.83926400 | -5.15610500 | 2.12548200  |
| C | -4.92234000 | -4.24650900 | 1.05789000  |
| H | -1.64483000 | -6.29864500 | 1.74943200  |
| H | -3.59352000 | -6.62721100 | 3.15698700  |
| O | -0.35413000 | -3.42348700 | -2.16599700 |
| O | -5.92424400 | -5.25594400 | 2.93712700  |
| H | -6.91851400 | -3.78961000 | 1.63503200  |
| H | -6.69033000 | -3.94389300 | -0.09314300 |
| C | -6.23052300 | -3.52136500 | 0.81582100  |
| C | -6.66500700 | 0.80233900  | 0.47141500  |
| C | -6.26485100 | -2.00637100 | 0.67098300  |
| C | -7.17443100 | -1.46819400 | -0.25583600 |
| C | -7.40690800 | -0.06854900 | -0.30276600 |
| H | -6.87077800 | 1.86691900  | 0.39155500  |
| H | -8.19091500 | 0.33338000  | -0.94797400 |
| C | -5.51148900 | -1.10230900 | 1.49039200  |
| C | -5.64505000 | 0.33996300  | 1.34648800  |
| C | -4.80883200 | 1.24656600  | 2.09969800  |
| C | -3.94517800 | 0.69393200  | 3.05871000  |
| C | -3.88421700 | -0.71028700 | 3.27247100  |
| C | -4.63174200 | -1.57931100 | 2.50104400  |
| H | -3.26170800 | -1.12109100 | 4.06820700  |
| H | -4.55978600 | -2.65017600 | 2.69085100  |
| O | -7.82675300 | -2.34303700 | -1.06646200 |
| O | -3.14016400 | 1.54812200  | 3.77708800  |
| C | -4.90218700 | 2.76957300  | 1.92967100  |
| H | -4.82404000 | 3.21861900  | 2.92982400  |
| H | -5.91036000 | 3.01811000  | 1.56841200  |
| C | -2.17188600 | 4.90412700  | -0.77951500 |
| C | -3.29020300 | 4.25158000  | -1.25837800 |

|   |             |             |             |
|---|-------------|-------------|-------------|
| C | -4.19105000 | 3.59029600  | -0.37812200 |
| C | -3.90770300 | 3.47571000  | 0.99622800  |
| H | -1.55267700 | 5.45655900  | -1.48306000 |
| H | -3.50388000 | 4.29286000  | -2.32885400 |
| C | -2.75691700 | 4.19178100  | 1.50157900  |
| C | -1.88234100 | 4.93998300  | 0.61340100  |
| C | -0.81798800 | 5.76286400  | 1.11915000  |
| C | -0.62682000 | 5.83270200  | 2.50785800  |
| C | -1.47380100 | 5.09999300  | 3.38261000  |
| C | -2.49921100 | 4.31284000  | 2.89652400  |
| H | -1.34540000 | 5.17876000  | 4.46425700  |
| H | -3.13219500 | 3.79025800  | 3.60947100  |
| O | -5.36712100 | 3.08311800  | -0.84456300 |
| O | 0.36520800  | 6.65157900  | 2.96569700  |
| C | -0.42805600 | -2.95993700 | -3.51862500 |
| H | 0.63129000  | -2.85266000 | -3.81277400 |
| H | -0.88688800 | -1.94747500 | -3.55675300 |
| C | 0.04102700  | -3.41954200 | 3.42423900  |
| H | 0.39136700  | -2.35991100 | 3.43563300  |
| H | 0.75725300  | -3.99652700 | 4.04447100  |
| C | 5.91671200  | -5.44628500 | -4.25108700 |
| H | 5.67227200  | -6.51833100 | -4.10568100 |
| H | 5.17441900  | -5.02286300 | -4.95951800 |
| C | -5.92571300 | -6.15719600 | 4.04881800  |
| H | -5.75994800 | -7.19410800 | 3.69176900  |
| H | -5.09505900 | -5.90180300 | 4.74013100  |
| C | -8.67753200 | -1.86490000 | -2.11225000 |
| H | -9.54915900 | -1.33454500 | -1.67719900 |
| H | -8.12203000 | -1.13778300 | -2.74250800 |
| C | 0.71750600  | 6.66576400  | 4.35422400  |
| H | 1.32145200  | 7.58013600  | 4.47841000  |
| H | -0.18820100 | 6.78961400  | 4.97869500  |
| C | -5.85992900 | 3.52298100  | -2.12044500 |
| H | -5.86465400 | 4.63100100  | -2.14515000 |
| H | -5.18783500 | 3.17040400  | -2.92731600 |
| C | -2.32177200 | 1.02840300  | 4.82320700  |
| H | -2.95219000 | 0.55996000  | 5.60556900  |
| H | -1.66012300 | 0.22730800  | 4.42793500  |
| H | 4.49734300  | -3.12774900 | 1.48639200  |
| C | 4.76014500  | 2.86075800  | -1.95541400 |
| C | 2.37639800  | 5.12009500  | 0.94609500  |
| C | 3.49748500  | 4.41321700  | 1.32843500  |
| C | 4.27905600  | 3.70975900  | 0.37307300  |
| C | 3.93873800  | 3.69900700  | -0.98118700 |
| H | 1.80379800  | 5.66079100  | 1.69951800  |
| H | 3.80889900  | 4.38284500  | 2.37925000  |
| C | 2.82920200  | 4.51863800  | -1.40791900 |
| C | 2.00764500  | 5.20637800  | -0.43065800 |
| C | 0.88245400  | 5.99353400  | -0.83521100 |
| C | 0.65682100  | 6.18873500  | -2.20773600 |
| C | 1.50289400  | 5.57836900  | -3.17174600 |
| C | 2.53615500  | 4.74834800  | -2.77977300 |
| H | 1.33857400  | 5.75500400  | -4.23724300 |
| H | 3.14347700  | 4.27725800  | -3.55359300 |
| C | -0.01320300 | 6.66924700  | 0.19250400  |
| H | -0.71802100 | 7.32137800  | -0.34613100 |
| H | 0.60106700  | 7.33405400  | 0.81894900  |
| O | 5.36056300  | 2.99631200  | 0.82916300  |
| O | -0.40606200 | 6.96488000  | -2.55612000 |
| C | 6.49245900  | 3.78386900  | 1.25757400  |

|   |             |             |             |
|---|-------------|-------------|-------------|
| H | 6.13811300  | 4.73467300  | 1.70161500  |
| H | 7.09773000  | 4.05086900  | 0.36559500  |
| C | -0.78468300 | 7.11631700  | -3.92834000 |
| H | 0.01989300  | 7.63868900  | -4.48406000 |
| H | -0.91941700 | 6.11555900  | -4.39135000 |
| N | 1.35226100  | 0.76620800  | 0.92870100  |
| C | 0.40360300  | 0.68941000  | 2.09780300  |
| C | -1.04919700 | 0.75923200  | 1.59053300  |
| N | -1.08689400 | 0.51831200  | 0.10119700  |
| C | -0.29572200 | -0.74022000 | -0.18214400 |
| C | 1.19102500  | -0.49529800 | 0.10993700  |
| H | 0.62567500  | 1.53031100  | 2.77091000  |
| H | 0.61013800  | -0.25307500 | 2.62369600  |
| H | -1.51504600 | 1.73790900  | 1.77733000  |
| H | -1.67906900 | -0.01189400 | 2.05536300  |
| H | -0.72072500 | -1.54120800 | 0.44132500  |
| H | -0.44748100 | -1.02545800 | -1.22979600 |
| H | 1.79383000  | -0.36314300 | -0.79989800 |
| H | 1.61661800  | -1.33877200 | 0.67201400  |
| C | -2.54794400 | 0.36791600  | -0.34516200 |
| H | -2.87060500 | -0.61941400 | 0.02260000  |
| H | -3.10257200 | 1.14093400  | 0.20606900  |
| C | 0.94401500  | 1.95770000  | 0.08401400  |
| C | 2.80902400  | 0.97475200  | 1.36166500  |
| H | 3.36774900  | 1.09462800  | 0.42094600  |
| H | 2.81160000  | 1.94710800  | 1.87610400  |
| C | -0.41375800 | 1.69015700  | -0.57301300 |
| H | -1.07645100 | 2.56478300  | -0.48677900 |
| H | -0.30295900 | 1.43079700  | -1.63122700 |
| H | 1.72036000  | 2.12250700  | -0.67530800 |
| H | 0.92502700  | 2.83606300  | 0.74592700  |
| C | -2.76691500 | 0.50711600  | -1.84176300 |
| H | -2.51132700 | 1.52972200  | -2.16995700 |
| H | -2.11309600 | -0.19100000 | -2.39314300 |
| C | 3.41520100  | -0.13192800 | 2.20071700  |
| H | 2.82211500  | -0.32200700 | 3.11568300  |
| H | 3.43019000  | -1.06628800 | 1.62088700  |
| C | -4.23982300 | 0.24400700  | -2.19356000 |
| H | -4.53416400 | -0.75615200 | -1.83626400 |
| H | -4.86040000 | 0.95160900  | -1.62349100 |
| C | 4.86000200  | 0.22219400  | 2.58806800  |
| H | 4.85565100  | 1.08985200  | 3.27475000  |
| H | 5.40120000  | 0.55454800  | 1.68709900  |
| C | -4.53999300 | 0.37299600  | -3.69277100 |
| H | -5.63817800 | 0.39736900  | -3.82832600 |
| H | -4.17121400 | 1.35254800  | -4.05987600 |
| C | 5.60564700  | -0.95320400 | 3.22561300  |
| H | 5.03484300  | -1.34301600 | 4.09326100  |
| H | 5.65778800  | -1.78060300 | 2.49281600  |
| C | -3.96246800 | -0.74348100 | -4.57351700 |
| H | -2.86665000 | -0.81313300 | -4.42327200 |
| H | -4.37643700 | -1.71460100 | -4.23857600 |
| C | 7.03285300  | -0.60700000 | 3.66263000  |
| H | 7.00283400  | 0.20962100  | 4.41073700  |
| H | 7.57617400  | -0.19638800 | 2.79070300  |
| C | -4.24646800 | -0.54578000 | -6.06460800 |
| H | -3.83480100 | -1.37282800 | -6.66921300 |
| H | -5.33312700 | -0.49684100 | -6.26058900 |
| H | -3.80050500 | 0.39634500  | -6.43416800 |
| C | 7.79234900  | -1.80972500 | 4.22654300  |

|   |             |             |             |
|---|-------------|-------------|-------------|
| H | 8.82619900  | -1.54247300 | 4.50733700  |
| H | 7.29532000  | -2.21243000 | 5.12803800  |
| H | 7.84409500  | -2.62449100 | 3.48218500  |
| C | -1.36737400 | -3.50708100 | 3.99458000  |
| H | -2.05798800 | -2.99399500 | 3.30104600  |
| H | -1.68221100 | -4.56413400 | 3.99811600  |
| C | 7.32972800  | -5.28283600 | -4.79377200 |
| H | 7.54832500  | -4.20172900 | -4.88009000 |
| H | 8.03968900  | -5.68933800 | -4.04930600 |
| C | -1.46443200 | -2.91697500 | 5.40291800  |
| H | -2.49841100 | -2.97352000 | 5.78419400  |
| H | -0.81835800 | -3.45874600 | 6.11701200  |
| H | -1.15789800 | -1.85384800 | 5.42625300  |
| C | 7.51363300  | -5.97853500 | -6.14527300 |
| H | 8.54372000  | -5.84792500 | -6.51770300 |
| H | 7.32166300  | -7.06468900 | -6.07124200 |
| H | 6.82814100  | -5.56801900 | -6.90966500 |
| C | 0.47309800  | 2.38791500  | -4.26912900 |
| H | 0.15816000  | 2.96087900  | -3.37678000 |
| H | 1.06818600  | 3.09076100  | -4.87709600 |
| C | 10.21158200 | -3.17393800 | 1.23458800  |
| H | 11.21598500 | -2.85734100 | 1.57459000  |
| H | 9.71066400  | -3.61172900 | 2.11849400  |
| C | -0.74634400 | 1.89996000  | -5.05686300 |
| H | -1.38396200 | 2.74746100  | -5.36162900 |
| H | -0.44957100 | 1.36175200  | -5.97496500 |
| H | -1.37167600 | 1.21325000  | -4.45822200 |
| C | 10.33072800 | -4.21404700 | 0.11731000  |
| H | 10.89744700 | -5.09718600 | 0.45878900  |
| H | 9.33511200  | -4.55576700 | -0.21433100 |
| H | 10.85540300 | -3.79671700 | -0.76205500 |
| C | 7.32060400  | 2.99722900  | 2.26117900  |
| H | 6.69895900  | 2.79394100  | 3.15286100  |
| H | 7.56339300  | 2.01297000  | 1.82498300  |
| C | -2.08225700 | 7.91120400  | -3.97800900 |
| H | -2.84627900 | 7.37567900  | -3.38212800 |
| H | -1.91797000 | 8.88216300  | -3.47536200 |
| C | 8.60195000  | 3.73421800  | 2.65989800  |
| H | 9.17956300  | 3.14947900  | 3.39609300  |
| H | 9.25500800  | 3.91071300  | 1.78566200  |
| H | 8.38157800  | 4.71752900  | 3.11412100  |
| C | -2.57226100 | 8.12633700  | -5.41259600 |
| H | -3.51137800 | 8.70479600  | -5.42489100 |
| H | -1.83109300 | 8.68370200  | -6.01377200 |
| H | -2.76437500 | 7.16535600  | -5.92565000 |
| C | 1.52060400  | 5.43237400  | 4.77666800  |
| H | 0.97719600  | 4.51981900  | 4.46411200  |
| H | 2.47866400  | 5.43027200  | 4.22388500  |
| C | -7.25805400 | 2.96781000  | -2.34366200 |
| H | -7.21124700 | 1.86625800  | -2.29522900 |
| H | -7.91371100 | 3.29668200  | -1.51613000 |
| C | 1.77535600  | 5.39661700  | 6.28626000  |
| H | 2.38299800  | 4.51942700  | 6.56876400  |
| H | 2.31524200  | 6.29854500  | 6.62657900  |
| H | 0.82712500  | 5.34517800  | 6.85256700  |
| C | -7.83233400 | 3.41185200  | -3.69223200 |
| H | -8.84588300 | 3.00304600  | -3.84198800 |
| H | -7.90440700 | 4.51239200  | -3.76126300 |
| H | -7.20382800 | 3.06272600  | -4.53254200 |
| C | -9.13441800 | -3.05691300 | -2.94162700 |

|   |              |             |             |
|---|--------------|-------------|-------------|
| H | -8.23912200  | -3.57941400 | -3.32877300 |
| H | -9.65075200  | -3.77118300 | -2.27381600 |
| C | -1.46723100  | 2.14432000  | 5.40853500  |
| H | -0.90506600  | 2.62816200  | 4.58868800  |
| H | -2.12842300  | 2.92502100  | 5.82710500  |
| C | -10.05327200 | -2.63926700 | -4.09296000 |
| H | -10.37242300 | -3.51691900 | -4.67994100 |
| H | -10.96577700 | -2.13802900 | -3.72144100 |
| H | -9.54570500  | -1.94163500 | -4.78519300 |
| C | -0.50571300  | 1.62823800  | 6.48252600  |
| H | 0.10572900   | 2.45027000  | 6.89216800  |
| H | -1.04814500  | 1.16410200  | 7.32555100  |
| H | 0.18701000   | 0.86667800  | 6.07552600  |
| C | -1.14851000  | -3.90346000 | -4.48256000 |
| H | -1.06961300  | -3.44771100 | -5.48895900 |
| H | -2.22751300  | -3.93006900 | -4.24560600 |
| C | -7.26860800  | -6.03951500 | 4.75633300  |
| H | -7.41373500  | -4.98585200 | 5.06118200  |
| H | -8.06890500  | -6.26961000 | 4.02853700  |
| C | -0.58429900  | -5.32563100 | -4.49593100 |
| H | -1.09062100  | -5.94156700 | -5.25827000 |
| H | 0.49776200   | -5.32786400 | -4.72036200 |
| H | -0.73087400  | -5.81928200 | -3.51997600 |
| C | -7.36480700  | -6.96823700 | 5.96990700  |
| H | -8.34494900  | -6.86671600 | 6.46568800  |
| H | -7.24702700  | -8.02821800 | 5.67909300  |
| H | -6.58596400  | -6.73792200 | 6.72040100  |

1 4 2.0 5 1.0 7 1.5  
2 3 1.5 8 1.5 17 1.0  
3 4 1.5 21 1.0  
4 6 1.0  
5  
6  
7 8 1.0 12 1.5  
8 9 1.5  
9 10 2.0 13 1.0  
10 11 1.5 14 1.0  
11 12 1.5 20 1.0  
12 125 1.0  
13  
14  
15 125 1.0  
16 125 1.0  
17 18 1.0 19 1.0 29 1.0  
18  
19  
20 22 1.0  
21 25 1.0  
22 23 1.0 24 1.0 223 1.0  
23  
24  
25 26 1.0 27 1.0 226 1.0  
26  
27  
28 31 2.0 32 1.0 35 1.5  
29 30 1.5 34 1.5  
30 31 1.5 41 1.0  
31 33 1.0  
32

33  
34 35 1.0 39 1.5  
35 36 1.5  
36 37 1.5 43 1.0  
37 38 1.5 42 1.0  
38 39 2.0 40 1.0  
39 124 1.0  
40  
41 106 1.0  
42 103 1.0  
43 44 1.0 45 1.0 49 1.0  
44  
45  
46 47 2.0 50 1.0 52 1.5  
47 48 1.5 51 1.0  
48 49 1.5 60 1.0  
49 53 1.5  
50  
51  
52 53 1.0 57 1.5  
53 54 1.5  
54 55 2.0 58 1.0  
55 56 1.5 59 1.0  
56 57 1.5 61 1.0  
57 64 1.0  
58  
59  
60 100 1.0  
61 109 1.0  
62 64 1.0  
63 64 1.0  
64 66 1.0  
65 68 2.0 69 1.0 72 1.5  
66 67 1.5 71 1.5  
67 68 1.5 79 1.0  
68 70 1.0  
69  
70  
71 72 1.0 76 1.5  
72 73 1.5  
73 74 1.5 81 1.0  
74 75 1.5 80 1.0  
75 76 2.0 77 1.0  
76 78 1.0  
77  
78  
79 112 1.0  
80 121 1.0  
81 82 1.0 83 1.0 87 1.0  
82  
83  
84 85 2.0 88 1.0 91 1.5  
85 86 1.5 89 1.0  
86 87 1.5 98 1.0  
87 90 1.5  
88  
89  
90 91 1.0 95 1.5  
91 92 1.5  
92 93 1.5 140 1.0

93 94 1.5 99 1.0  
94 95 2.0 96 1.0  
95 97 1.0  
96  
97  
98 118 1.0  
99 115 1.0  
100 101 1.0 102 1.0 279 1.0  
101  
102  
103 104 1.0 105 1.0 209 1.0  
104  
105  
106 107 1.0 108 1.0 212 1.0  
107  
108  
109 110 1.0 111 1.0 282 1.0  
110  
111  
112 113 1.0 114 1.0 265 1.0  
113  
114  
115 116 1.0 117 1.0 251 1.0  
116  
117  
118 119 1.0 120 1.0 254 1.0  
119  
120  
121 122 1.0 123 1.0 268 1.0  
122  
123  
124  
125 129 1.0  
126 127 2.0 130 1.0 133 1.5  
127 128 1.5 131 1.0  
128 129 1.5 143 1.0  
129 132 1.5  
130  
131  
132 133 1.0 137 1.5  
133 134 1.5  
134 135 1.5 140 1.0  
135 136 1.5 144 1.0  
136 137 2.0 138 1.0  
137 139 1.0  
138  
139  
140 141 1.0 142 1.0  
141  
142  
143 145 1.0  
144 148 1.0  
145 146 1.0 147 1.0 237 1.0  
146  
147  
148 149 1.0 150 1.0 240 1.0  
149  
150  
151 152 1.0 156 1.0 168 1.0 169 1.0  
152 153 1.0 157 1.0 158 1.0

153 154 1.0 159 1.0 160 1.0  
154 155 1.0 165 1.0 172 1.0  
155 156 1.0 161 1.0 162 1.0  
156 163 1.0 164 1.0  
157  
158  
159  
160  
161  
162  
163  
164  
165 166 1.0 167 1.0 177 1.0  
166  
167  
168 172 1.0 175 1.0 176 1.0  
169 170 1.0 171 1.0 180 1.0  
170  
171  
172 173 1.0 174 1.0  
173  
174  
175  
176  
177 178 1.0 179 1.0 183 1.0  
178  
179  
180 181 1.0 182 1.0 186 1.0  
181  
182  
183 184 1.0 185 1.0 189 1.0  
184  
185  
186 187 1.0 188 1.0 192 1.0  
187  
188  
189 190 1.0 191 1.0 195 1.0  
190  
191  
192 193 1.0 194 1.0 198 1.0  
193  
194  
195 196 1.0 197 1.0 201 1.0  
196  
197  
198 199 1.0 200 1.0 205 1.0  
199  
200  
201 202 1.0 203 1.0 204 1.0  
202  
203  
204  
205 206 1.0 207 1.0 208 1.0  
206  
207  
208  
209 210 1.0 211 1.0 215 1.0  
210  
211  
212 213 1.0 214 1.0 219 1.0



213  
214  
215 216 1.0 217 1.0 218 1.0  
216  
217  
218  
219 220 1.0 221 1.0 222 1.0  
220  
221  
222  
223 224 1.0 225 1.0 229 1.0  
224  
225  
226 227 1.0 228 1.0 233 1.0  
227  
228  
229 230 1.0 231 1.0 232 1.0  
230  
231  
232  
233 234 1.0 235 1.0 236 1.0  
234  
235  
236  
237 238 1.0 239 1.0 243 1.0  
238  
239  
240 241 1.0 242 1.0 247 1.0  
241  
242  
243 244 1.0 245 1.0 246 1.0  
244  
245  
246  
247 248 1.0 249 1.0 250 1.0  
248  
249  
250  
251 252 1.0 253 1.0 257 1.0  
252  
253  
254 255 1.0 256 1.0 261 1.0  
255  
256  
257 258 1.0 259 1.0 260 1.0  
258  
259  
260  
261 262 1.0 263 1.0 264 1.0  
262  
263  
264  
265 266 1.0 267 1.0 271 1.0  
266  
267  
268 269 1.0 270 1.0 275 1.0  
269  
270  
271 272 1.0 273 1.0 274 1.0  
272

273  
274  
275 276 1.0 277 1.0 278 1.0  
276  
277  
278  
279 280 1.0 281 1.0 285 1.0  
280  
281  
282 283 1.0 284 1.0 289 1.0  
283  
284  
285 286 1.0 287 1.0 288 1.0  
286  
287  
288  
289 290 1.0 291 1.0 292 1.0  
290  
291  
292

---

0 imaginary frequency

Atomic coordinates of  $5^{2+}@PrS[5]^{nPr}$  complex.

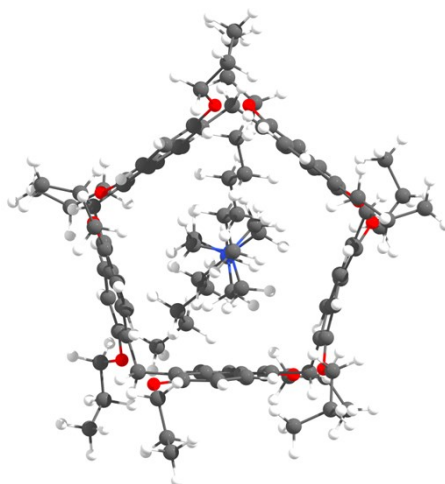

**Figure S83.** DFT-optimized structure (B97D3/SVP/SVPFIT) of the  $5^{2+}@PrS[5]^{nPr}$  complex.

|   |            |             |             |
|---|------------|-------------|-------------|
| C | 2.26720000 | -2.56540000 | 3.13550000  |
| C | 0.53790000 | -4.32650000 | 1.70660000  |
| C | 0.26470000 | -3.96350000 | 3.03830000  |
| C | 1.11470000 | -3.05480000 | 3.72690000  |
| H | 2.90720000 | -1.90720000 | 3.72290000  |
| H | 0.88550000 | -2.75940000 | 4.75390000  |
| C | 2.66740000 | -2.98660000 | 1.83370000  |
| C | 1.77820000 | -3.88590000 | 1.12340000  |
| C | 2.22160000 | -4.38070000 | -0.13800000 |
| C | 3.47040000 | -4.06460000 | -0.63760000 |
| C | 4.34660000 | -3.19840000 | 0.07070000  |
| C | 3.94740000 | -2.61870000 | 1.28480000  |
| H | 1.58590000 | -5.05540000 | -0.70830000 |
| H | 3.79090000 | -4.49950000 | -1.58830000 |
| C | 4.90900000 | -1.71130000 | 2.04470000  |

|   |             |             |             |
|---|-------------|-------------|-------------|
| H | 5.04920000  | -2.10800000 | 3.06140000  |
| H | 5.88930000  | -1.76520000 | 1.54880000  |
| C | -0.42900000 | -5.22950000 | 0.93780000  |
| H | -1.09690000 | -5.71680000 | 1.66250000  |
| H | 0.13500000  | -6.03650000 | 0.44850000  |
| O | 5.58690000  | -2.89350000 | -0.40970000 |
| O | -0.81840000 | -4.53010000 | 3.63810000  |
| C | 6.28370000  | -3.82390000 | -1.25940000 |
| H | 6.22870000  | -4.83240000 | -0.80360000 |
| H | 5.79760000  | -3.86500000 | -2.25220000 |
| C | -1.17770000 | -4.19530000 | 4.98390000  |
| H | -0.33660000 | -4.44290000 | 5.66210000  |
| H | -1.36760000 | -3.10350000 | 5.05590000  |
| C | -2.73200000 | -3.10680000 | -2.12420000 |
| C | -1.26550000 | -4.51410000 | -0.12460000 |
| C | -0.97760000 | -4.68610000 | -1.49140000 |
| C | -1.69140000 | -3.94980000 | -2.47690000 |
| H | -3.27820000 | -2.59940000 | -2.91860000 |
| H | -1.44940000 | -4.07080000 | -3.53600000 |
| C | -2.40350000 | -3.70810000 | 0.23350000  |
| C | -3.15650000 | -2.98030000 | -0.76970000 |
| C | -4.34640000 | -2.24660000 | -0.42130000 |
| C | -4.80040000 | -2.29960000 | 0.90540000  |
| C | -4.05640000 | -2.99810000 | 1.89460000  |
| C | -2.88780000 | -3.66120000 | 1.57380000  |
| H | -4.41820000 | -3.02260000 | 2.92620000  |
| O | -0.01730000 | -5.59110000 | -1.82560000 |
| O | -5.96210000 | -1.65390000 | 1.21480000  |
| C | -5.17500000 | -1.52660000 | -1.48010000 |
| H | -6.13980000 | -1.25410000 | -1.02770000 |
| H | -5.40040000 | -2.23120000 | -2.29470000 |
| C | -3.26430000 | 1.98140000  | -3.23870000 |
| C | -3.49070000 | 0.84750000  | -3.99710000 |
| C | -4.13860000 | -0.28610000 | -3.43490000 |
| C | -4.53410000 | -0.28570000 | -2.08630000 |
| H | -2.77920000 | 2.83090000  | -3.71540000 |
| H | -3.18790000 | 0.84680000  | -5.04680000 |
| C | -3.70170000 | 2.07360000  | -1.88760000 |
| C | -4.37380000 | 0.92070000  | -1.32290000 |
| C | -4.90570000 | 1.04960000  | -0.00670000 |
| C | -4.79650000 | 2.23450000  | 0.69910000  |
| C | -4.11930000 | 3.35820000  | 0.14720000  |
| C | -3.52790000 | 3.28030000  | -1.12540000 |
| H | -5.44660000 | 0.22160000  | 0.45320000  |
| H | -5.25810000 | 2.30230000  | 1.68730000  |
| O | -4.40090000 | -1.40730000 | -4.16160000 |
| O | -4.01450000 | 4.54140000  | 0.81570000  |
| H | -2.95300000 | 5.34470000  | -1.05720000 |
| H | -3.17520000 | 4.72080000  | -2.68970000 |
| C | -2.76550000 | 4.47160000  | -1.69930000 |
| C | 1.54750000  | 3.87250000  | -2.15580000 |
| C | -1.25890000 | 4.27020000  | -1.84640000 |
| C | -0.67910000 | 4.16040000  | -3.12310000 |
| C | 0.71150000  | 3.88720000  | -3.25910000 |
| H | 2.61580000  | 3.72440000  | -2.31620000 |
| H | 1.14630000  | 3.73710000  | -4.25090000 |
| C | -0.38670000 | 4.29200000  | -0.70210000 |
| C | 1.04980000  | 4.15130000  | -0.84910000 |
| C | 1.93930000  | 4.38810000  | 0.25670000  |
| C | 1.38570000  | 4.81670000  | 1.47670000  |

|   |             |             |             |
|---|-------------|-------------|-------------|
| C | -0.02600000 | 4.82810000  | 1.65930000  |
| C | -0.88470000 | 4.56180000  | 0.60640000  |
| H | -0.45190000 | 5.09950000  | 2.62890000  |
| H | -1.95820000 | 4.64500000  | 0.77850000  |
| O | -1.49030000 | 4.32930000  | -4.20300000 |
| O | 2.24410000  | 5.21460000  | 2.45630000  |
| C | 3.45370000  | 4.28140000  | 0.09160000  |
| H | 3.92740000  | 4.78600000  | 0.94700000  |
| H | 3.76040000  | 4.83800000  | -0.80610000 |
| C | 4.97600000  | 0.19190000  | -0.24980000 |
| C | 5.03410000  | 1.06020000  | -1.32620000 |
| C | 4.55870000  | 2.39690000  | -1.21850000 |
| C | 3.99720000  | 2.85870000  | -0.01540000 |
| H | 5.36990000  | -0.81710000 | -0.37800000 |
| H | 5.47330000  | 0.70780000  | -2.26260000 |
| C | 3.99750000  | 1.97870000  | 1.12040000  |
| C | 4.46940000  | 0.61330000  | 1.01390000  |
| C | 4.47910000  | -0.25570000 | 2.15950000  |
| C | 4.13580000  | 0.27830000  | 3.41210000  |
| C | 3.66180000  | 1.61450000  | 3.51710000  |
| C | 3.58130000  | 2.42970000  | 2.40490000  |
| H | 3.38140000  | 2.02440000  | 4.49010000  |
| H | 3.23500000  | 3.45210000  | 2.54000000  |
| O | 4.62470000  | 3.27650000  | -2.25770000 |
| O | 4.24880000  | -0.53910000 | 4.49950000  |
| C | -4.05130000 | -1.48720000 | -5.54970000 |
| H | -2.95620000 | -1.34710000 | -5.66440000 |
| H | -4.56150000 | -0.67370000 | -6.10370000 |
| C | -6.78840000 | -2.12990000 | 2.29450000  |
| H | -6.90700000 | -3.22700000 | 2.19430000  |
| H | -6.29900000 | -1.92100000 | 3.26410000  |
| C | 0.35910000  | -5.79820000 | -3.19240000 |
| H | -0.52680000 | -6.12500000 | -3.77310000 |
| H | 0.72070000  | -4.84170000 | -3.62540000 |
| C | -4.61270000 | 4.71550000  | 2.10620000  |
| H | -5.70540000 | 4.54450000  | 2.03070000  |
| H | -4.19710000 | 3.96710000  | 2.81310000  |
| C | -0.93920000 | 4.39760000  | -5.52790000 |
| H | -0.49820000 | 3.41370000  | -5.79440000 |
| H | -0.13110000 | 5.15420000  | -5.54570000 |
| C | 4.23790000  | 0.00190000  | 5.83090000  |
| H | 4.15530000  | -0.88560000 | 6.48110000  |
| H | 3.32390000  | 0.60920000  | 5.99160000  |
| C | 5.20810000  | 2.89640000  | -3.51000000 |
| H | 6.26140000  | 2.59110000  | -3.34710000 |
| H | 4.66000000  | 2.02560000  | -3.92660000 |
| C | 1.74670000  | 5.78740000  | 3.67580000  |
| H | 1.07050000  | 6.62950000  | 3.43140000  |
| H | 1.16120000  | 5.02330000  | 4.22990000  |
| H | -2.35350000 | -4.18980000 | 2.36110000  |
| C | 7.72620000  | -3.35760000 | -1.39780000 |
| H | 7.72750000  | -2.34810000 | -1.85310000 |
| H | 8.21050000  | -4.02640000 | -2.13450000 |
| C | -2.42320000 | -4.98740000 | 5.36170000  |
| H | -3.25520000 | -4.68680000 | 4.69540000  |
| H | -2.71230000 | -4.66490000 | 6.38020000  |
| C | -4.48170000 | -2.85200000 | -6.07160000 |
| H | -4.12770000 | -2.92440000 | -7.11760000 |
| H | -3.93990000 | -3.63460000 | -5.50510000 |
| C | -8.13200000 | -1.41870000 | 2.21800000  |

|   |             |             |             |
|---|-------------|-------------|-------------|
| H | -8.70670000 | -1.72130000 | 3.11390000  |
| H | -7.95960000 | -0.32930000 | 2.31790000  |
| C | 1.45090000  | -6.86010000 | -3.23630000 |
| H | 1.76540000  | -6.95390000 | -4.29330000 |
| H | 2.33510000  | -6.48810000 | -2.68310000 |
| C | -4.31730000 | 6.13170000  | 2.58300000  |
| H | -4.71960000 | 6.21700000  | 3.61050000  |
| H | -3.21980000 | 6.25560000  | 2.66850000  |
| C | -2.04680000 | 4.77070000  | -6.50320000 |
| H | -1.56290000 | 4.93220000  | -7.48520000 |
| H | -2.46630000 | 5.74830000  | -6.20080000 |
| C | 5.49920000  | 0.79580000  | 6.16460000  |
| H | 6.37270000  | 0.13140000  | 6.02980000  |
| H | 5.62030000  | 1.62110000  | 5.43860000  |
| C | 5.12910000  | 4.08770000  | -4.45590000 |
| H | 5.51260000  | 3.74720000  | -5.43660000 |
| H | 4.06340000  | 4.34630000  | -4.61280000 |
| C | 2.92410000  | 6.27020000  | 4.51170000  |
| H | 3.49290000  | 7.01210000  | 3.92090000  |
| H | 2.49710000  | 6.82120000  | 5.37100000  |
| C | 8.51450000  | -3.35250000 | -0.08580000 |
| H | 9.56000000  | -3.04310000 | -0.25510000 |
| H | 8.07110000  | -2.65550000 | 0.64600000  |
| H | 8.53110000  | -4.35800000 | 0.37280000  |
| C | -2.22950000 | -6.50550000 | 5.32040000  |
| H | -3.15090000 | -7.02870000 | 5.62770000  |
| H | -1.96630000 | -6.84690000 | 4.30480000  |
| H | -1.41930000 | -6.82130000 | 6.00260000  |
| C | -5.99190000 | -3.09380000 | -6.00430000 |
| H | -6.25070000 | -4.08540000 | -6.41290000 |
| H | -6.35730000 | -3.04840000 | -4.96410000 |
| H | -6.54280000 | -2.33440000 | -6.58890000 |
| C | -8.93150000 | -1.71820000 | 0.94750000  |
| H | -9.90940000 | -1.20760000 | 0.96740000  |
| H | -8.39330000 | -1.37990000 | 0.04530000  |
| H | -9.12000000 | -2.80220000 | 0.84180000  |
| C | 1.01420000  | -8.22170000 | -2.68950000 |
| H | 1.83170000  | -8.95850000 | -2.76840000 |
| H | 0.72130000  | -8.15030000 | -1.62820000 |
| H | 0.14890000  | -8.61710000 | -3.25220000 |
| C | -4.90900000 | 7.22400000  | 1.68830000  |
| H | -4.68640000 | 8.22680000  | 2.09100000  |
| H | -4.49780000 | 7.16840000  | 0.66590000  |
| H | -6.00760000 | 7.12650000  | 1.61580000  |
| C | -3.16090000 | 3.72880000  | -6.63300000 |
| H | -3.88410000 | 4.02330000  | -7.41250000 |
| H | -2.75140000 | 2.73990000  | -6.91510000 |
| H | -3.71980000 | 3.60970000  | -5.68950000 |
| C | 5.46040000  | 1.35490000  | 7.58990000  |
| H | 6.38920000  | 1.90200000  | 7.82360000  |
| H | 4.61660000  | 2.05730000  | 7.72560000  |
| H | 5.35040000  | 0.54990000  | 8.33930000  |
| C | 5.91020000  | 5.31390000  | -3.97650000 |
| H | 5.83950000  | 6.13690000  | -4.70810000 |
| H | 5.52220000  | 5.68190000  | -3.01140000 |
| H | 6.98080000  | 5.07510000  | -3.84080000 |
| C | 3.85370000  | 5.16070000  | 5.01180000  |
| H | 4.63370000  | 5.57260000  | 5.67470000  |
| H | 3.29370000  | 4.40060000  | 5.58990000  |
| H | 4.36260000  | 4.64800000  | 4.17840000  |

|   |             |             |             |
|---|-------------|-------------|-------------|
| N | 0.49070000  | -0.14350000 | -1.19010000 |
| C | 1.49800000  | 0.54990000  | -0.29910000 |
| C | 0.78880000  | 1.08570000  | 0.94390000  |
| N | -0.52470000 | 0.35410000  | 1.12360000  |
| C | -0.26720000 | -1.12820000 | 0.96200000  |
| C | 0.06580000  | -1.42480000 | -0.50570000 |
| H | 1.96250000  | 1.37090000  | -0.86320000 |
| H | 2.26950000  | -0.18380000 | -0.03740000 |
| H | 0.55660000  | 2.15680000  | 0.86450000  |
| H | 1.40600000  | 0.92040000  | 1.83790000  |
| H | 0.55780000  | -1.38980000 | 1.64050000  |
| H | -1.16750000 | -1.68010000 | 1.26060000  |
| H | -0.79850000 | -1.81550000 | -1.06180000 |
| H | 0.88810000  | -2.14890000 | -0.56380000 |
| C | -1.09380000 | 0.69650000  | 2.49220000  |
| H | -0.33220000 | 0.37010000  | 3.21970000  |
| H | -1.13560000 | 1.79900000  | 2.50670000  |
| C | -0.72520000 | 0.75050000  | -1.31790000 |
| C | 1.06580000  | -0.39460000 | -2.57570000 |
| H | 0.24990000  | -0.85710000 | -3.15570000 |
| H | 1.25290000  | 0.61290000  | -2.98500000 |
| C | -1.46450000 | 0.78600000  | 0.01890000  |
| H | -1.82240000 | 1.80220000  | 0.23620000  |
| H | -2.31750000 | 0.09740000  | 0.02370000  |
| H | -1.37640000 | 0.34350000  | -2.10390000 |
| H | -0.37220000 | 1.74430000  | -1.62740000 |
| C | -2.45570000 | 0.08560000  | 2.78680000  |
| H | -3.12730000 | 0.20000000  | 1.91980000  |
| H | -2.36260000 | -0.99840000 | 2.97180000  |
| C | 2.32660000  | -1.24660000 | -2.59640000 |
| H | 3.02410000  | -0.92650000 | -1.80450000 |
| H | 2.08290000  | -2.30360000 | -2.39280000 |
| C | -3.12350000 | 0.76600000  | 3.98930000  |
| H | -2.47750000 | 0.68830000  | 4.88610000  |
| H | -3.22560000 | 1.84910000  | 3.77660000  |
| C | 3.05750000  | -1.12830000 | -3.94030000 |
| H | 3.32250000  | -0.06550000 | -4.11060000 |
| H | 2.38520000  | -1.41470000 | -4.77320000 |
| C | -4.50550000 | 0.17560000  | 4.28620000  |
| H | -5.10050000 | 0.17840000  | 3.35220000  |
| H | -4.39020000 | -0.89080000 | 4.56540000  |
| C | 4.32970000  | -1.98080000 | -3.97790000 |
| H | 4.93900000  | -1.75050000 | -3.08240000 |
| H | 4.05120000  | -3.04950000 | -3.88400000 |
| C | -5.27590000 | 0.91140000  | 5.38780000  |
| H | -4.67500000 | 0.90850000  | 6.31850000  |
| H | -5.38390000 | 1.97740000  | 5.10200000  |
| C | 5.17680000  | -1.78210000 | -5.23930000 |
| H | 5.44930000  | -0.71070000 | -5.32540000 |
| H | 4.56170000  | -2.00890000 | -6.13240000 |
| C | -6.65660000 | 0.30790000  | 5.65900000  |
| H | -7.18630000 | 0.85260000  | 6.45920000  |
| H | -7.29230000 | 0.33970000  | 4.75520000  |
| H | -6.57650000 | -0.74960000 | 5.97260000  |
| C | 6.44540000  | -2.63930000 | -5.25100000 |
| H | 7.03330000  | -2.47950000 | -6.17110000 |
| H | 7.09790000  | -2.40090000 | -4.39110000 |
| H | 6.20100000  | -3.71640000 | -5.19470000 |

2 3 1.5 8 1.5 18 1.0  
3 4 1.5 22 1.0  
4 6 1.0  
5  
6  
7 8 1.0 12 1.5  
8 9 1.5  
9 10 2.0 13 1.0  
10 11 1.5 14 1.0  
11 12 1.5 21 1.0  
12 15 1.0  
13  
14  
15 16 1.0 17 1.0 93 1.0  
16  
17  
18 19 1.0 20 1.0 30 1.0  
19  
20  
21 23 1.0  
22 26 1.0  
23 24 1.0 25 1.0 126 1.0  
24  
25  
26 27 1.0 28 1.0 129 1.0  
27  
28  
29 32 2.0 33 1.0 36 1.5  
30 31 1.5 35 1.5  
31 32 1.5 42 1.0  
32 34 1.0  
33  
34  
35 36 1.0 40 1.5  
36 37 1.5  
37 38 1.5 44 1.0  
38 39 1.5 43 1.0  
39 40 2.0 41 1.0  
40 125 1.0  
41  
42 107 1.0  
43 104 1.0  
44 45 1.0 46 1.0 50 1.0  
45  
46  
47 48 2.0 51 1.0 53 1.5  
48 49 1.5 52 1.0  
49 50 1.5 61 1.0  
50 54 1.5  
51  
52  
53 54 1.0 58 1.5  
54 55 1.5  
55 56 2.0 59 1.0  
56 57 1.5 60 1.0  
57 58 1.5 62 1.0  
58 65 1.0  
59  
60  
61 101 1.0

62 110 1.0  
63 65 1.0  
64 65 1.0  
65 67 1.0  
66 69 2.0 70 1.0 73 1.5  
67 68 1.5 72 1.5  
68 69 1.5 80 1.0  
69 71 1.0  
70  
71  
72 73 1.0 77 1.5  
73 74 1.5  
74 75 1.5 82 1.0  
75 76 1.5 81 1.0  
76 77 2.0 78 1.0  
77 79 1.0  
78  
79  
80 113 1.0  
81 122 1.0  
82 83 1.0 84 1.0 88 1.0  
83  
84  
85 86 2.0 89 1.0 92 1.5  
86 87 1.5 90 1.0  
87 88 1.5 99 1.0  
88 91 1.5  
89  
90  
91 92 1.0 96 1.5  
92 93 1.5  
93 94 1.5  
94 95 1.5 100 1.0  
95 96 2.0 97 1.0  
96 98 1.0  
97  
98  
99 119 1.0  
100 116 1.0  
101 102 1.0 103 1.0 132 1.0  
102  
103  
104 105 1.0 106 1.0 135 1.0  
105  
106  
107 108 1.0 109 1.0 138 1.0  
108  
109  
110 111 1.0 112 1.0 141 1.0  
111  
112  
113 114 1.0 115 1.0 144 1.0  
114  
115  
116 117 1.0 118 1.0 147 1.0  
117  
118  
119 120 1.0 121 1.0 150 1.0  
120  
121



122 123 1.0 124 1.0 153 1.0  
123  
124  
125  
126 127 1.0 128 1.0 156 1.0  
127  
128  
129 130 1.0 131 1.0 160 1.0  
130  
131  
132 133 1.0 134 1.0 164 1.0  
133  
134  
135 136 1.0 137 1.0 168 1.0  
136  
137  
138 139 1.0 140 1.0 172 1.0  
139  
140  
141 142 1.0 143 1.0 176 1.0  
142  
143  
144 145 1.0 146 1.0 180 1.0  
145  
146  
147 148 1.0 149 1.0 184 1.0  
148  
149  
150 151 1.0 152 1.0 188 1.0  
151  
152  
153 154 1.0 155 1.0 192 1.0  
154  
155  
156 157 1.0 158 1.0 159 1.0  
157  
158  
159  
160 161 1.0 162 1.0 163 1.0  
161  
162  
163  
164 165 1.0 166 1.0 167 1.0  
165  
166  
167  
168 169 1.0 170 1.0 171 1.0  
169  
170  
171  
172 173 1.0 174 1.0 175 1.0  
173  
174  
175  
176 177 1.0 178 1.0 179 1.0  
177  
178  
179  
180 181 1.0 182 1.0 183 1.0  
181

182  
183  
184 185 1.0 186 1.0 187 1.0  
185  
186  
187  
188 189 1.0 190 1.0 191 1.0  
189  
190  
191  
192 193 1.0 194 1.0 195 1.0  
193  
194  
195  
196 197 1.0 201 1.0 213 1.0 214 1.0  
197 198 1.0 202 1.0 203 1.0  
198 199 1.0 204 1.0 205 1.0  
199 200 1.0 210 1.0 217 1.0  
200 201 1.0 206 1.0 207 1.0  
201 208 1.0 209 1.0  
202  
203  
204  
205  
206  
207  
208  
209  
210 211 1.0 212 1.0 222 1.0  
211  
212  
213 217 1.0 220 1.0 221 1.0  
214 215 1.0 216 1.0 225 1.0  
215  
216  
217 218 1.0 219 1.0  
218  
219  
220  
221  
222 223 1.0 224 1.0 228 1.0  
223  
224  
225 226 1.0 227 1.0 231 1.0  
226  
227  
228 229 1.0 230 1.0 234 1.0  
229  
230  
231 232 1.0 233 1.0 237 1.0  
232  
233  
234 235 1.0 236 1.0 240 1.0  
235  
236  
237 238 1.0 239 1.0 243 1.0  
238  
239  
240 241 1.0 242 1.0 246 1.0  
241

242  
 243 244 1.0 245 1.0 250 1.0  
 244  
 245  
 246 247 1.0 248 1.0 249 1.0  
 247  
 248  
 249  
 250 251 1.0 252 1.0 253 1.0  
 251  
 252  
 253

---

0 imaginary frequency

Atomic coordinates of  $7^{2+}@PrS[5]^{nPr}$  complex

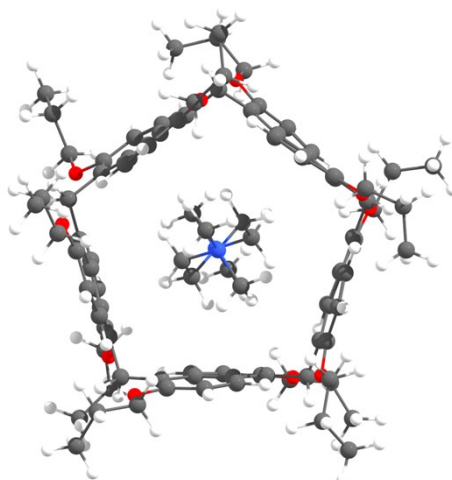

**Figure S84.** DFT-optimized structures (B97D3/SVP/SVPPFIT) of the  $7^{2+}@PrS[5]^{nPr}$  complex.

|   |             |             |             |
|---|-------------|-------------|-------------|
| C | -0.68850000 | -4.34010000 | -1.80930000 |
| C | 1.96570000  | -4.45880000 | -0.78060000 |
| C | 1.72410000  | -4.51760000 | -2.16420000 |
| C | 0.39710000  | -4.40990000 | -2.66740000 |
| H | -1.68780000 | -4.30470000 | -2.24420000 |
| H | 0.21590000  | -4.42740000 | -3.74540000 |
| C | -0.51960000 | -4.40280000 | -0.39550000 |
| C | 0.83820000  | -4.45080000 | 0.11110000  |
| C | 1.00910000  | -4.55400000 | 1.52210000  |
| C | -0.07600000 | -4.67530000 | 2.37200000  |
| C | -1.40500000 | -4.68450000 | 1.86450000  |
| C | -1.64670000 | -4.49080000 | 0.49370000  |
| H | 2.01020000  | -4.59810000 | 1.94980000  |
| H | 0.10520000  | -4.81270000 | 3.44130000  |
| C | -3.07670000 | -4.47560000 | -0.03560000 |
| H | -3.16460000 | -5.20280000 | -0.85640000 |
| H | -3.74230000 | -4.82860000 | 0.76620000  |
| C | 3.39500000  | -4.45490000 | -0.24750000 |
| H | 4.07410000  | -4.72890000 | -1.06800000 |
| H | 3.50460000  | -5.23590000 | 0.51890000  |
| O | -2.48530000 | -4.89450000 | 2.66740000  |
| O | 2.79960000  | -4.68190000 | -2.98130000 |
| C | -2.32970000 | -5.10860000 | 4.07450000  |
| H | -1.69490000 | -6.00040000 | 4.24820000  |
| H | -1.81780000 | -4.23530000 | 4.53250000  |
| C | 2.64490000  | -4.76260000 | -4.40410000 |

|   |             |             |             |
|---|-------------|-------------|-------------|
| H | 1.96970000  | -5.60590000 | -4.65270000 |
| H | 2.17970000  | -3.82690000 | -4.77970000 |
| C | 4.58240000  | -0.62990000 | 1.51190000  |
| C | 3.83200000  | -3.12140000 | 0.35290000  |
| C | 4.05280000  | -3.00440000 | 1.73570000  |
| C | 4.40160000  | -1.74790000 | 2.30640000  |
| H | 4.87600000  | 0.30470000  | 1.99030000  |
| H | 4.56580000  | -1.66100000 | 3.38390000  |
| C | 4.09350000  | -1.97970000 | -0.48100000 |
| C | 4.46330000  | -0.70120000 | 0.09380000  |
| C | 4.79070000  | 0.42090000  | -0.74540000 |
| C | 4.84240000  | 0.22570000  | -2.13640000 |
| C | 4.46180000  | -1.02140000 | -2.70480000 |
| C | 4.08200000  | -2.08120000 | -1.90190000 |
| H | 4.49780000  | -1.16610000 | -3.78790000 |
| O | 3.93160000  | -4.13350000 | 2.48630000  |
| O | 5.27150000  | 1.26980000  | -2.89970000 |
| C | 5.17770000  | 1.76910000  | -0.14780000 |
| H | 5.63420000  | 2.37970000  | -0.94110000 |
| H | 5.95760000  | 1.61620000  | 0.61260000  |
| C | 1.93940000  | 4.04250000  | 1.71400000  |
| C | 2.95400000  | 3.49750000  | 2.48080000  |
| C | 4.02110000  | 2.77520000  | 1.87780000  |
| C | 4.03750000  | 2.55590000  | 0.48990000  |
| H | 1.15990000  | 4.61270000  | 2.21810000  |
| H | 2.94010000  | 3.65890000  | 3.56130000  |
| C | 1.94720000  | 3.94240000  | 0.29260000  |
| C | 3.01760000  | 3.17440000  | -0.31430000 |
| C | 3.07220000  | 3.13870000  | -1.73830000 |
| C | 2.18790000  | 3.86970000  | -2.51190000 |
| C | 1.17320000  | 4.66390000  | -1.91040000 |
| C | 0.99660000  | 4.65770000  | -0.51570000 |
| H | 3.86600000  | 2.58790000  | -2.24210000 |
| H | 2.30930000  | 3.86400000  | -3.59850000 |
| O | 5.05920000  | 2.27590000  | 2.60240000  |
| O | 0.34770000  | 5.46060000  | -2.64280000 |
| H | -0.54780000 | 6.13830000  | -0.65070000 |
| H | 0.28460000  | 6.11910000  | 0.90180000  |
| C | -0.12980000 | 5.47010000  | 0.11630000  |
| C | -3.28460000 | 3.02780000  | 1.90310000  |
| C | -1.25030000 | 4.63490000  | 0.72610000  |
| C | -1.42370000 | 4.59660000  | 2.12060000  |
| C | -2.41500000 | 3.75290000  | 2.69820000  |
| H | -4.05230000 | 2.42750000  | 2.39050000  |
| H | -2.52680000 | 3.70120000  | 3.78460000  |
| C | -2.19210000 | 3.92960000  | -0.10210000 |
| C | -3.23900000 | 3.11620000  | 0.48190000  |
| C | -4.23130000 | 2.48010000  | -0.34030000 |
| C | -4.22640000 | 2.73830000  | -1.72150000 |
| C | -3.17100000 | 3.49330000  | -2.30520000 |
| C | -2.17960000 | 4.05820000  | -1.52100000 |
| H | -3.15430000 | 3.67220000  | -3.38370000 |
| H | -1.41710000 | 4.66500000  | -2.00830000 |
| O | -0.62220000 | 5.39610000  | 2.87920000  |
| O | -5.26220000 | 2.24600000  | -2.45930000 |
| C | -5.30840000 | 1.59430000  | 0.27450000  |
| H | -6.09140000 | 1.42420000  | -0.47950000 |
| H | -5.79060000 | 2.12590000  | 1.10790000  |
| C | -3.83090000 | -2.23690000 | 1.77760000  |
| C | -4.29880000 | -1.26780000 | 2.64910000  |
| C | -4.80690000 | -0.03010000 | 2.16580000  |
| C | -4.79850000 | 0.25180000  | 0.78890000  |
| H | -3.48030000 | -3.18160000 | 2.19220000  |
| H | -4.29840000 | -1.48020000 | 3.72160000  |

|   |             |             |             |
|---|-------------|-------------|-------------|
| C | -4.38420000 | -0.78200000 | -0.11970000 |
| C | -3.88440000 | -2.05330000 | 0.36570000  |
| C | -3.58030000 | -3.12890000 | -0.54330000 |
| C | -3.86270000 | -2.95050000 | -1.90680000 |
| C | -4.32110000 | -1.69330000 | -2.38930000 |
| C | -4.55600000 | -0.64000000 | -1.52760000 |
| H | -4.52450000 | -1.55620000 | -3.45400000 |
| H | -4.93510000 | 0.29280000  | -1.94190000 |
| O | -5.31930000 | 0.91950000  | 2.99540000  |
| O | -3.66130000 | -4.01180000 | -2.74240000 |
| C | 5.16570000  | 2.52250000  | 4.01140000  |
| H | 4.28530000  | 2.09100000  | 4.53130000  |
| H | 5.16920000  | 3.61630000  | 4.19180000  |
| C | 5.42270000  | 1.13770000  | -4.31910000 |
| H | 6.12650000  | 0.30930000  | -4.53690000 |
| H | 4.44290000  | 0.88470000  | -4.77570000 |
| C | 4.16850000  | -4.11330000 | 3.90000000  |
| H | 5.20010000  | -3.75690000 | 4.09390000  |
| H | 3.46290000  | -3.40590000 | 4.38360000  |
| C | 0.49470000  | 5.57460000  | -4.06430000 |
| H | 1.52180000  | 5.91860000  | -4.30000000 |
| H | 0.34880000  | 4.57910000  | -4.53330000 |
| C | -0.87180000 | 5.55640000  | 4.28430000  |
| H | -0.68290000 | 4.59340000  | 4.80500000  |
| H | -1.93470000 | 5.82660000  | 4.43590000  |
| C | -4.28760000 | -4.05770000 | -4.03650000 |
| H | -3.82620000 | -4.93200000 | -4.52610000 |
| H | -4.00600000 | -3.16550000 | -4.63200000 |
| C | -5.40400000 | 0.70000000  | 4.40960000  |
| H | -6.01280000 | -0.20580000 | 4.60410000  |
| H | -4.38710000 | 0.52560000  | 4.81920000  |
| C | -5.39860000 | 2.59040000  | -3.84560000 |
| H | -5.38360000 | 3.69260000  | -3.95010000 |
| H | -4.53800000 | 2.17870000  | -4.41530000 |
| H | 3.82730000  | -3.02660000 | -2.37870000 |
| C | -3.71220000 | -5.30100000 | 4.68290000  |
| H | -4.20340000 | -6.15000000 | 4.17280000  |
| H | -4.32580000 | -4.40630000 | 4.46230000  |
| C | 4.02120000  | -4.97030000 | -5.02320000 |
| H | 4.65910000  | -4.10050000 | -4.77140000 |
| H | 3.88760000  | -4.94900000 | -6.12150000 |
| C | 6.45590000  | 1.88550000  | 4.51080000  |
| H | 6.47530000  | 2.01480000  | 5.60970000  |
| H | 6.40650000  | 0.79410000  | 4.32830000  |
| C | 5.95010000  | 2.45720000  | -4.86780000 |
| H | 5.98010000  | 2.35960000  | -5.96970000 |
| H | 5.21240000  | 3.25340000  | -4.64690000 |
| C | 3.97420000  | -5.52550000 | 4.43710000  |
| H | 4.08240000  | -5.47020000 | 5.53700000  |
| H | 2.92940000  | -5.83850000 | 4.24400000  |
| C | -0.54050000 | 6.56970000  | -4.57290000 |
| H | -0.46360000 | 6.57940000  | -5.67680000 |
| H | -1.55110000 | 6.18300000  | -4.33610000 |
| C | 0.04120000  | 6.64690000  | 4.82680000  |
| H | -0.25980000 | 6.81810000  | 5.87770000  |
| H | -0.17480000 | 7.58730000  | 4.28620000  |
| C | -5.80400000 | -4.22020000 | -3.96300000 |
| H | -6.02690000 | -5.14340000 | -3.39670000 |
| H | -6.23780000 | -3.38500000 | -3.38220000 |
| C | -6.04110000 | 1.92840000  | 5.04620000  |
| H | -6.01970000 | 1.77220000  | 6.14150000  |
| H | -5.39640000 | 2.80650000  | 4.84550000  |
| C | -6.70930000 | 2.02050000  | -4.37060000 |
| H | -7.53960000 | 2.44270000  | -3.77450000 |

|   |             |             |             |
|---|-------------|-------------|-------------|
| H | -6.83610000 | 2.41180000  | -5.39780000 |
| C | -3.64830000 | -5.54700000 | 6.19290000  |
| H | -4.65940000 | -5.68450000 | 6.61120000  |
| H | -3.06460000 | -6.45500000 | 6.42990000  |
| H | -3.17890000 | -4.69830000 | 6.72460000  |
| C | 4.70240000  | -6.27320000 | -4.59610000 |
| H | 5.68330000  | -6.38420000 | -5.08880000 |
| H | 4.86460000  | -6.29970000 | -3.50500000 |
| H | 4.08790000  | -7.15080000 | -4.86760000 |
| C | 7.72230000  | 2.47480000  | 3.88430000  |
| H | 8.62590000  | 1.99550000  | 4.29780000  |
| H | 7.73150000  | 2.33040000  | 2.79030000  |
| H | 7.79630000  | 3.55980000  | 4.08220000  |
| C | 7.33050000  | 2.84520000  | -4.33140000 |
| H | 7.67410000  | 3.79350000  | -4.77850000 |
| H | 7.31190000  | 2.97300000  | -3.23550000 |
| H | 8.08170000  | 2.06980000  | -4.56820000 |
| C | 4.95370000  | -6.54970000 | 3.85800000  |
| H | 4.78430000  | -7.54810000 | 4.29600000  |
| H | 4.84190000  | -6.63490000 | 2.76350000  |
| H | 6.00010000  | -6.26270000 | 4.06890000  |
| C | -0.36640000 | 7.98500000  | -4.01590000 |
| H | -1.12540000 | 8.66830000  | -4.43320000 |
| H | -0.46570000 | 7.99680000  | -2.91700000 |
| H | 0.62930000  | 8.39260000  | -4.26930000 |
| C | 1.53590000  | 6.32300000  | 4.75600000  |
| H | 2.13170000  | 7.11260000  | 5.24470000  |
| H | 1.76200000  | 5.36880000  | 5.26980000  |
| H | 1.88560000  | 6.24090000  | 3.71310000  |
| C | -6.43940000 | -4.27350000 | -5.35560000 |
| H | -7.53070000 | -4.41680000 | -5.28450000 |
| H | -6.26170000 | -3.33710000 | -5.91690000 |
| H | -6.03230000 | -5.10730000 | -5.95620000 |
| C | -7.47290000 | 2.19870000  | 4.57620000  |
| H | -7.89340000 | 3.08330000  | 5.08390000  |
| H | -7.50850000 | 2.38180000  | 3.48870000  |
| H | -8.13250000 | 1.33930000  | 4.79570000  |
| C | -6.78520000 | 0.49100000  | -4.38070000 |
| H | -7.72190000 | 0.14810000  | -4.85250000 |
| H | -5.94500000 | 0.05320000  | -4.95340000 |
| H | -6.75610000 | 0.07480000  | -3.35970000 |
| N | -0.02570000 | 0.03040000  | 1.40270000  |
| C | 0.02720000  | -1.27030000 | 0.61990000  |
| C | 0.74580000  | -1.11600000 | -0.70190000 |
| N | 0.11800000  | -0.05460000 | -1.59060000 |
| C | 0.02800000  | 1.24730000  | -0.81190000 |
| C | -0.66530000 | 1.09180000  | 0.52530000  |
| H | -1.00960000 | -1.62090000 | 0.49950000  |
| H | 0.55880000  | -2.02200000 | 1.22400000  |
| H | 0.71270000  | -2.07450000 | -1.24010000 |
| H | 1.80500000  | -0.84790000 | -0.57290000 |
| H | 1.05340000  | 1.63180000  | -0.70620000 |
| H | -0.54020000 | 1.97600000  | -1.41100000 |
| H | -1.72810000 | 0.82650000  | 0.42270000  |
| H | -0.61270000 | 2.05540000  | 1.05530000  |
| C | 1.01780000  | 0.15580000  | -2.77960000 |
| H | 0.58100000  | 0.94260000  | -3.41040000 |
| H | 2.01160000  | 0.46350000  | -2.42430000 |
| H | 1.09240000  | -0.79480000 | -3.32580000 |
| C | -0.89450000 | -0.16860000 | 2.61620000  |
| H | -0.98100000 | 0.79460000  | 3.13890000  |
| H | -1.88840000 | -0.51570000 | 2.29820000  |
| H | -0.42100000 | -0.92580000 | 3.25730000  |
| C | 1.35180000  | 0.45410000  | 1.84810000  |

|   |             |             |             |
|---|-------------|-------------|-------------|
| H | 1.25970000  | 1.37690000  | 2.43610000  |
| H | 1.79410000  | -0.35890000 | 2.43950000  |
| H | 1.99860000  | 0.65440000  | 0.98620000  |
| C | -1.24460000 | -0.49390000 | -2.06690000 |
| H | -1.65000000 | 0.28690000  | -2.72410000 |
| H | -1.13590000 | -1.44950000 | -2.59730000 |
| H | -1.92180000 | -0.63040000 | -1.21680000 |

1 4 2.0 5 1.0 7 1.5  
2 3 1.5 8 1.5 18 1.0  
3 4 1.5 22 1.0  
4 6 1.0  
5  
6  
7 8 1.0 12 1.5  
8 9 1.5  
9 10 2.0 13 1.0  
10 11 1.5 14 1.0  
11 12 1.5 21 1.0  
12 15 1.0  
13  
14  
15 16 1.0 17 1.0 93 1.0  
16  
17  
18 19 1.0 20 1.0 30 1.0  
19  
20  
21 23 1.0  
22 26 1.0  
23 24 1.0 25 1.0 126 1.0  
24  
25  
26 27 1.0 28 1.0 129 1.0  
27  
28  
29 32 2.0 33 1.0 36 1.5  
30 31 1.5 35 1.5  
31 32 1.5 42 1.0  
32 34 1.0  
33  
34  
35 36 1.0 40 1.5  
36 37 1.5  
37 38 1.5 44 1.0  
38 39 1.5 43 1.0  
39 40 2.0 41 1.0  
40 125 1.0  
41  
42 107 1.0  
43 104 1.0  
44 45 1.0 46 1.0 50 1.0  
45  
46  
47 48 2.0 51 1.0 53 1.5  
48 49 1.5 52 1.0  
49 50 1.5 61 1.0  
50 54 1.5  
51  
52  
53 54 1.0 58 1.5  
54 55 1.5  
55 56 2.0 59 1.0  
56 57 1.5 60 1.0

57 58 1.5 62 1.0  
58 65 1.0  
59  
60  
61 101 1.0  
62 110 1.0  
63 65 1.0  
64 65 1.0  
65 67 1.0  
66 69 2.0 70 1.0 73 1.5  
67 68 1.5 72 1.5  
68 69 1.5 80 1.0  
69 71 1.0  
70  
71  
72 73 1.0 77 1.5  
73 74 1.5  
74 75 1.5 82 1.0  
75 76 1.5 81 1.0  
76 77 2.0 78 1.0  
77 79 1.0  
78  
79  
80 113 1.0  
81 122 1.0  
82 83 1.0 84 1.0 88 1.0  
83  
84  
85 86 2.0 89 1.0 92 1.5  
86 87 1.5 90 1.0  
87 88 1.5 99 1.0  
88 91 1.5  
89  
90  
91 92 1.0 96 1.5  
92 93 1.5  
93 94 1.5  
94 95 1.5 100 1.0  
95 96 2.0 97 1.0  
96 98 1.0  
97  
98  
99 119 1.0  
100 116 1.0  
101 102 1.0 103 1.0 132 1.0  
102  
103  
104 105 1.0 106 1.0 135 1.0  
105  
106  
107 108 1.0 109 1.0 138 1.0  
108  
109  
110 111 1.0 112 1.0 141 1.0  
111  
112  
113 114 1.0 115 1.0 144 1.0  
114  
115  
116 117 1.0 118 1.0 147 1.0  
117  
118  
119 120 1.0 121 1.0 150 1.0  
120



121  
122 123 1.0 124 1.0 153 1.0  
123  
124  
125  
126 127 1.0 128 1.0 156 1.0  
127  
128  
129 130 1.0 131 1.0 160 1.0  
130  
131  
132 133 1.0 134 1.0 164 1.0  
133  
134  
135 136 1.0 137 1.0 168 1.0  
136  
137  
138 139 1.0 140 1.0 172 1.0  
139  
140  
141 142 1.0 143 1.0 176 1.0  
142  
143  
144 145 1.0 146 1.0 180 1.0  
145  
146  
147 148 1.0 149 1.0 184 1.0  
148  
149  
150 151 1.0 152 1.0 188 1.0  
151  
152  
153 154 1.0 155 1.0 192 1.0  
154  
155  
156 157 1.0 158 1.0 159 1.0  
157  
158  
159  
160 161 1.0 162 1.0 163 1.0  
161  
162  
163  
164 165 1.0 166 1.0 167 1.0  
165  
166  
167  
168 169 1.0 170 1.0 171 1.0  
169  
170  
171  
172 173 1.0 174 1.0 175 1.0  
173  
174  
175  
176 177 1.0 178 1.0 179 1.0  
177  
178  
179  
180 181 1.0 182 1.0 183 1.0  
181  
182  
183  
184 185 1.0 186 1.0 187 1.0

185  
186  
187  
188 189 1.0 190 1.0 191 1.0  
189  
190  
191  
192 193 1.0 194 1.0 195 1.0  
193  
194  
195  
196 197 1.0 201 1.0 214 1.0 218 1.0  
197 198 1.0 202 1.0 203 1.0  
198 199 1.0 204 1.0 205 1.0  
199 200 1.0 210 1.0 222 1.0  
200 201 1.0 206 1.0 207 1.0  
201 208 1.0 209 1.0  
202  
203  
204  
205  
206  
207  
208  
209  
210 211 1.0 212 1.0 213 1.0  
211  
212  
213  
214 215 1.0 216 1.0 217 1.0  
215  
216  
217  
218 219 1.0 220 1.0 221 1.0  
219  
220  
221  
222 223 1.0 224 1.0 225 1.0  
223  
224  
225

---

0 imaginary frequency

## NBO and NCI analysis

Natural bond orbital (NBO) studies were performed with NBO 3.1 version implemented in Gaussian 16 and second-order perturbation theory analysis was performed on optimized structures using the B97D3/SVP/SVPFIT level of theory. The non-covalent interaction (NCI) investigations were carried out with the Multiwfn program<sup>13</sup> and its plot was graphed with VMD program.<sup>14</sup>

Plots describe the RDG values versus the electron density multiplied by the sign of the second Hessian eigenvalue ( $s = 0.5$  a.u.; left) and gradient isosurfaces ( $s = 0.4$  a.u.; right) for the complexes. The coloring scheme was chosen to assist in distinguishing the amplitude of the electron density corresponding to different types of interactions. Marked in green color represent medium-strong (cation $\cdots\pi$ , Van der Waals and C-H $\cdots\pi$ ) interactions whereas the red color represents the repulsive ones.

---

<sup>13</sup> T. Lu, F. W. Chen, *J. Comput. Chem.* 2012, **33**, 580-592.

<sup>14</sup> W. Humphrey, A. Dalke, K. Schulten *J. Mol. Graph.* 1996, **14**, 33-38.

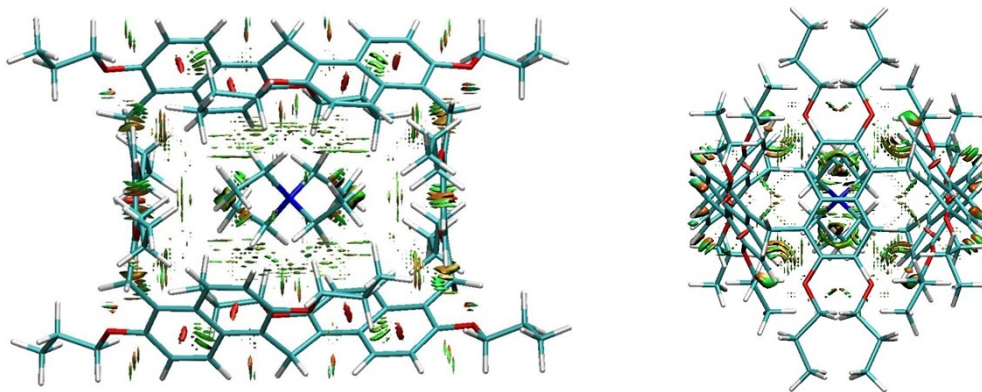

**Figure S85.** Gradient RDG isosurfaces (0.5) for the noncovalent interaction (NCI) regions in  $6^+ @ \text{PrS}[6]^{nPr}$  complexes.

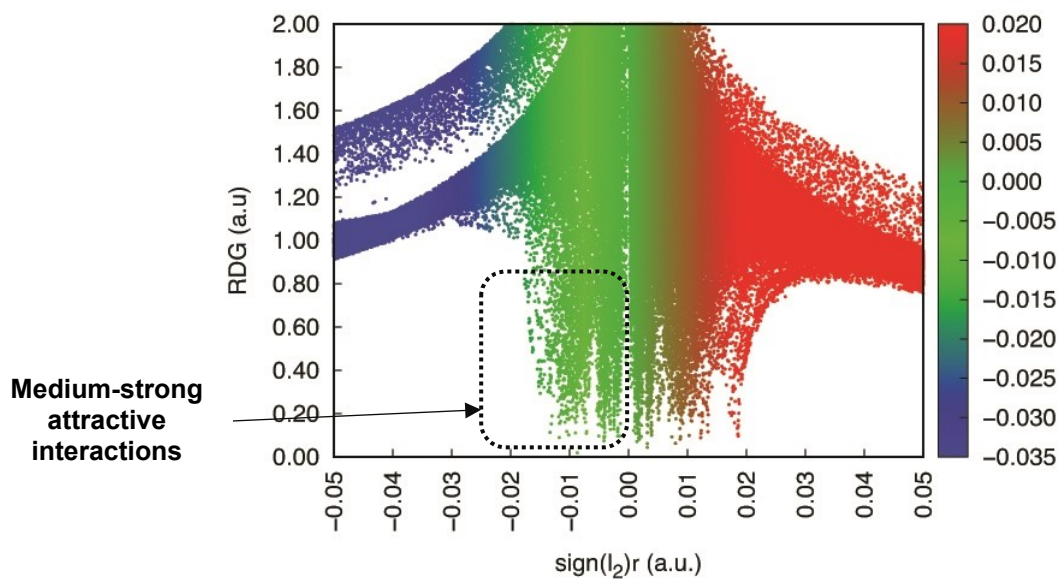

**Figure S86.** Plot of RDG versus  $\text{sign}(I_2)r$  for  $6^+ @ \text{PrS}[6]^{nPr}$  complex (NCI-RDG isosurfaces with  $S = 0.5$ ).

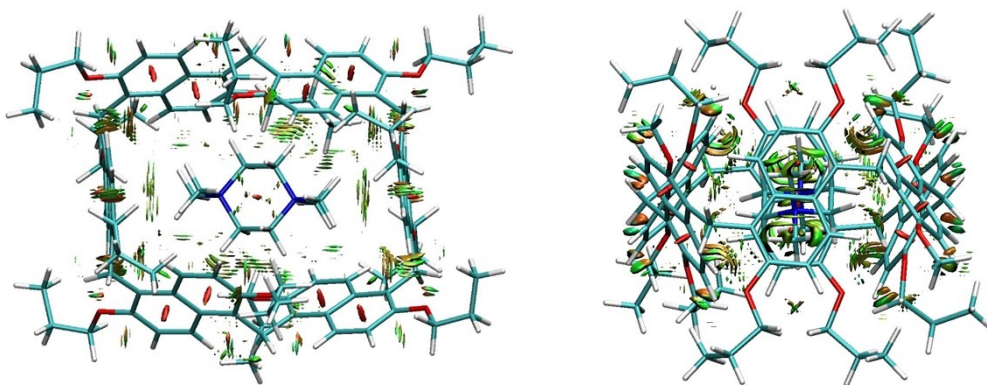

**Figure S87.** Gradient RDG isosurfaces (0.5) for the noncovalent interaction (NCI) regions in  $7^{2+} @ \text{PrS}[6]^{nPr}$  complexes.

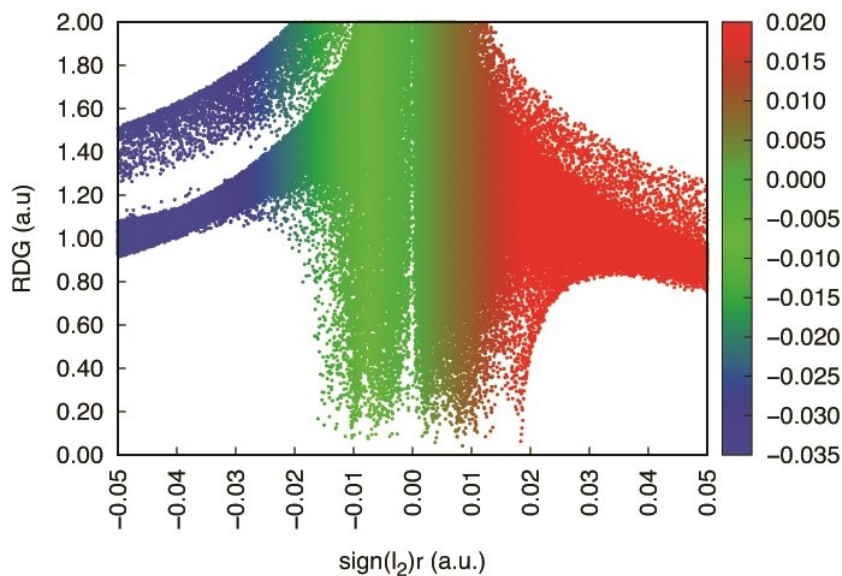

**Figure S88.** Plot of RDG versus  $\text{sign}(I_2)r$  for  $7^{2+} @ \text{PrS}[6]^{nPr}$  complex (NCI-RDG isosurfaces with  $S = 0.5$ ).

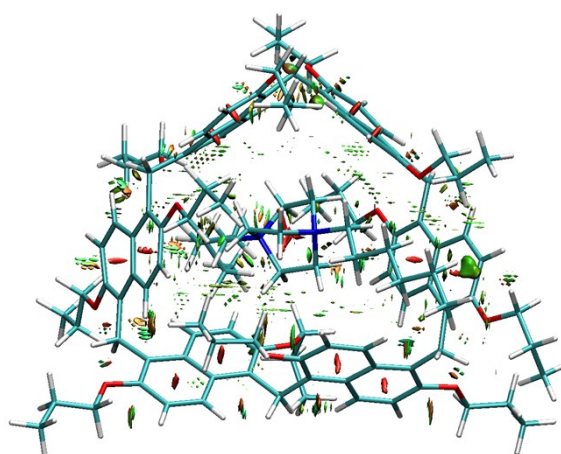

**Figure S89.** Gradient RDG isosurfaces (0.5) for the noncovalent interaction (NCI) regions in  $5^{2+} @ \text{PrS}[6]^{nPr}$  complexes.

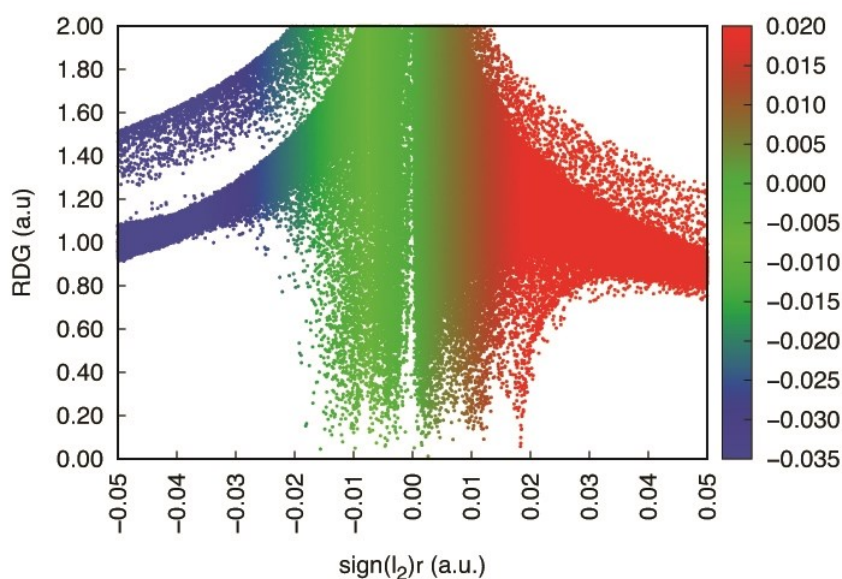

**Figure S90.** Plot of RDG versus  $\text{sign}(I_2)r$  for  $5^{2+} @ \text{PrS}[6]^{nPr}$  complex (NCI-RDG isosurfaces with  $S = 0.5$ ).

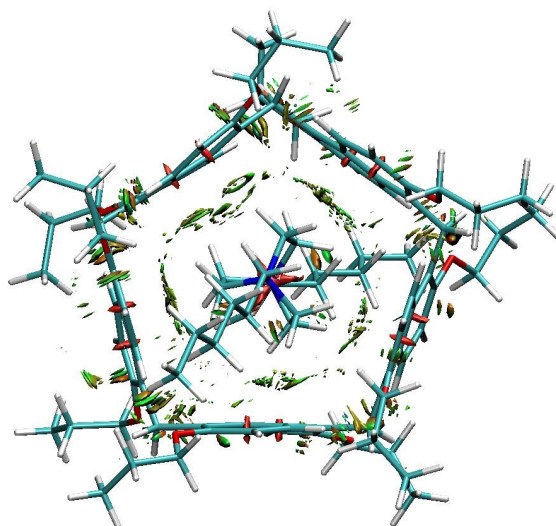

**Figure S91.** Gradient RDG isosurfaces (0.5) for the noncovalent interaction (NCI) regions in  $5^{2+}@PrS[5]^{nPr}$  complexes.

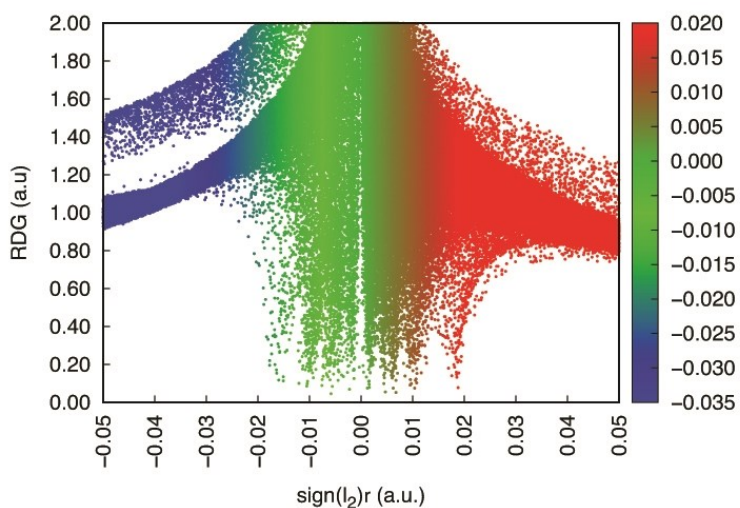

**Figure S92.** Plot of RDG versus  $sign(I_2)r$  for  $5^{2+}@PrS[5]^{nPr}$  complex (NCI-RDG isosurfaces with  $S = 0.5$ ).

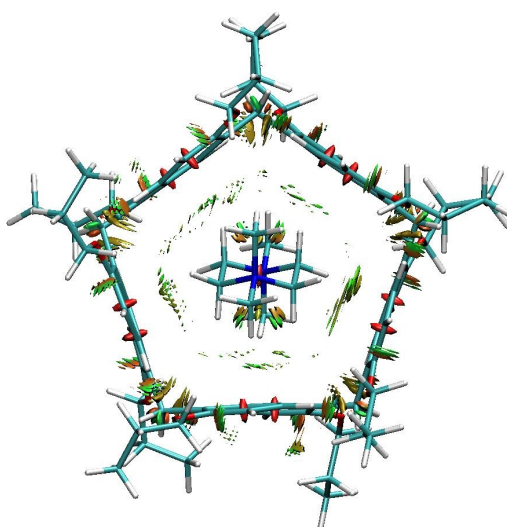

**Figure S93.** Gradient RDG isosurfaces (0.5) for the noncovalent interaction (NCI) regions in  $7^{2+}@PrS[5]^{nPr}$  complexes.

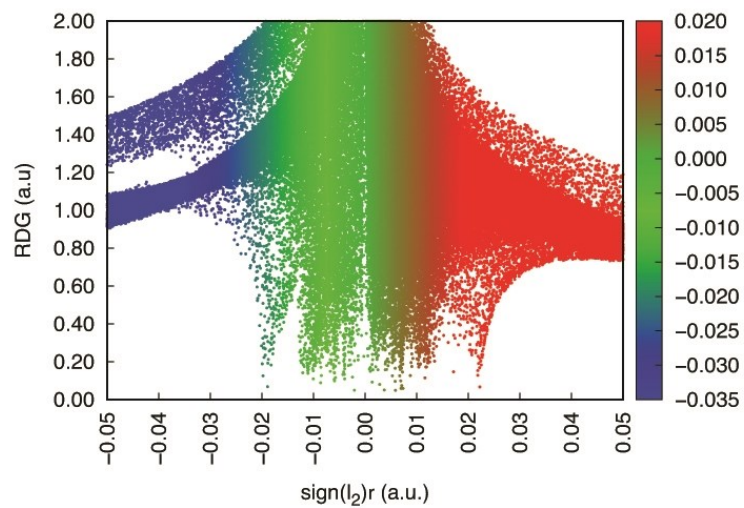

**Figure S94.** Plot of RDG versus  $\text{sign}(I_2)r$  for  $7^{2+}$  @  $\text{PrS}[5]^{nPr}$  complex (NCI-RDG isosurfaces with  $S = 0.5$ ).

## Determination of crystallographic structures of prismarenes: $\text{PrS}[5]^{Et}$ , $\text{PrS}[5]^{nPr}$ , $\text{PrS}[6]^{Et}$ and $\text{PrS}[6]^{nPr}$ and prismarenes host-guest complexes: $7@PrS[5]^{Me}\cdot(\text{BArF})_2$ , $10@PrS[5]^{Me}\cdot\text{BArF}$ and $6@PrS[6]^{Me}\cdot\text{BArF}$

Single crystals suitable for X-ray investigations were obtained by slow evaporation of solutions containing the molecules, using various solvents: ethyl acetate/dichloromethane for  $\text{PrS}[5]^{Et}$ ; methanol/dichloromethane for  $\text{PrS}[5]^{nPr}$  and  $\text{PrS}[6]^{nPr}$ ; hexane/dichloromethane for  $\text{PrS}[6]^{Et}$  and for the host-guest complexes  $7@PrS[5]^{Me}\cdot(\text{BArF})_2$ ,  $10@PrS[5]^{Me}\cdot\text{BArF}$  and  $6@PrS[6]^{Me}\cdot\text{BArF}$ . Data collection was carried out at the Macromolecular crystallography XRD1 beamline of the Elettra synchrotron (Trieste, Italy), employing the rotating-crystal method with a Dectris Pilatus 2M area detector. Single crystals were dipped in paratone cryoprotectant, mounted on a nylon loop and flash-frozen under a nitrogen stream at a 100 K. Diffraction data were indexed and integrated using the XDS package,<sup>15</sup> while scaling was carried out with XSCALE.<sup>16</sup> The anisotropic X-ray diffraction pattern of  $6@PrS[6]^{Me}\cdot\text{BArF}$  crystal was scaled using UCLA-DOE LAB - Diffraction Anisotropy Server.<sup>17</sup> Structures were solved using the SHELXT program<sup>18</sup> and structure refinement was performed with SHELXL-18/3,<sup>19</sup> operating through the WinGX GUI,<sup>20</sup> by full-matrix least-squares (FMLS) methods on  $F^2$ . Non-hydrogen atoms were refined anisotropically, with the exception of some disordered groups. Details of the treatment of disorder in each structure are described below. Hydrogen atoms were added at the calculated positions and refined using the riding model. Crystallographic data and refinement details are reported in **Table S5** and **S6**.

### $\text{PrS}[5]^{Et}$

The asymmetric unit of the triclinic crystals of  $\text{PrS}[5]^{Et}$  ( $P -1$ ) contains two P5E molecules and two co-crystallized ethyl acetate solvent molecules. In each independent molecule two ethyl groups show two-position disorder with 0.6/0.4 and 0.7/0.3 partial occupations. For three ethyl groups the disorder mainly involved the terminal methyl groups, while in one case the disorder involves the methylene carbon. In order to consider the position disorder of the hydrogen atoms, the methylene carbon atoms of the former three groups and the methyl carbon atom of the latter group were split and constrained with the EXYZ and EADP instructions. All non-hydrogen atoms were refined anisotropically. The structure was refined as a 2-component non-merohedral twin. The twin law  $(-1, 0, 0; -0.931, 1, -0.112; 0, 0, -1)$ , which corresponds to a two-fold axis about the  $[-1 \ 2 \ 0]$  direct lattice direction, were detected with PLATON TwinRotMat. The fraction of overlapped reflections was calculated as 30%. The refinement as a 2-component twin with HKLF 5 card significantly

<sup>15</sup> W. Kabsch *Acta Crystallogr.* 2010, **D66**, 125-132.

<sup>16</sup> W. Kabsch *Acta Crystallogr.* 2010, **D66**, 133-144.

<sup>17</sup> M. Strong, M.R. Sawaya, S. Wang, M. Phillips, D. Cascio, D. Eisenberg *Proc. Natl. Acad. Sci. USA.* 2006, **103**, 8060-8065.

<sup>18</sup> G. M. Sheldrick *Acta Crystallogr.* 2015, **A71**, 3-8

<sup>19</sup> G. M. Sheldrick *Acta Crystallogr.* 2008, **A64**, 112-122.

<sup>20</sup> L. J. Farrugia *J. Appl. Cryst.* 2012, **45**, 849-854.

reduced the R-factor: The  $R_1$  factor decreased by 0.067. The refined BASF factor is 0.32.

### **PrS[5]<sup>nPr</sup>**

The asymmetric unit of the monoclinic crystals of **PrS[5]<sup>nPr</sup>** ( $P 2_1/c$ ) contains one **PrS[5]<sup>nPr</sup>** molecule only. No co-crystallized solvent molecules are present. The structure exhibits no significant disorder and all atoms were refined at full occupation, with all non-hydrogen atoms refined anisotropically.

### **PrS[6]<sup>Et</sup>**

The asymmetric unit of the triclinic crystals of **PrS[6]<sup>Et</sup>** ( $P -1$ ) contains two **PrS[6]<sup>Et</sup>** molecules and approximately 1.775 co-crystallized dichloromethane solvent molecules (vide infra). Both crystallographically independent molecules show two-position disorder of one ethyl group, which was refined at 0.5/0.5 partial occupancies in both cases. In one case, the disorder mainly involved the terminal methyl group, while in the other it involves the entire fragment. In order to consider the position disorder of the hydrogen atoms, the methylene carbon atom in the former case was split and constrained with the EXYZ and EADP instructions. The carbon atom sites with partial occupancy were refined isotropically. The crystal structure shows the presence of highly disordered co-crystallized solvent dichloromethane molecules in voids present in the crystal packing. The PLATON SQUEEZE procedure was used to remove the electron density related to these highly disordered dichloromethane molecules.<sup>21</sup> The residual electron density of 299 electrons/cell in a total potential solvent area volume of 1249 Å<sup>3</sup> (15.46% of the cell volume) can be attributed to 7.1 dichloromethane solvent molecules.

### **PrS[6]<sup>nPr</sup>**

The asymmetric unit of the monoclinic crystals of **PrS[6]<sup>nPr</sup>** ( $C 2/c$ ) contains half **PrS[6]<sup>nPr</sup>** molecule and a disordered co-crystallized toluene solvent molecule at 0.5 of occupancy factor. Both lie on crystallographic two-fold axes. The **PrS[6]<sup>nPr</sup>** molecule exhibits no significant disorder, while the toluene molecule exhibits a two positions disorder related by crystallographic symmetry. All non-hydrogen atoms were refined anisotropically. The anisotropic thermal factors of toluene carbon atoms were restrained with the ISOR and SIMU instructions. The structure was refined as a 2-component twin. The twin law (-1, 0, 0; 0, -1, 0; 0.866, 0, 1), which corresponds to a two-fold axis about the [2 0 5] direct lattice direction, were detected with PLATON TwinRotMat. The fraction of overlapped reflections was calculated as 32%. The refinement as a 2-component twin with HKLF 5 card significantly reduced the R-factor: The  $R_1$  factor decreased by 0,062, with a refined BASF factor of 0.37.

### **7@PrS[5]<sup>Me</sup>·(BArF)<sub>2</sub>**

---

<sup>21</sup> A. L. Spek, *Acta Crystallogr. Sect. D Biol. Crystallogr.* 2009, **65**, 148–155.



The asymmetric unit of the monoclinic crystals of **7@PrS[5]<sup>Me</sup>·(BArF)<sub>2</sub>** (*P* 2/*c*) contains a half **7<sup>2+</sup>@PrS[5]<sup>Me</sup>** host-guest complex, one BArF counter ion and a disordered co-crystallized CH<sub>2</sub>Cl<sub>2</sub> solvent molecule at 0.35 occupancy. The host-guest complex lies on a crystallographic two-fold axis. This symmetry axis passes through a methylene bridging atom and the center of the opposite naphthalene ring of the **PrS[5]<sup>Me</sup>** host. The **7<sup>2+</sup>** guest ion is statistically disordered over two positions related by this crystallographic symmetry operation; while the C2 symmetric **PrS[5]<sup>Me</sup>** host exhibits no significant disorder. The BArF counter ion, located in a general position, exhibits a rotational disorder of two CF<sub>3</sub> groups. Finally, a CH<sub>2</sub>Cl<sub>2</sub> solvent molecule is positioned close to a two-fold axis with 0.35 occupancy.

### **10@PrS[5]<sup>Me</sup>·BArF**

The asymmetric unit of the centrosymmetric triclinic crystals of **10@PrS[5]<sup>Me</sup>·BArF** contains two **10<sup>+</sup>@PrS[5]<sup>Me</sup>** host-guest complexes, two BArF counter ion and approximately 1.1 co-crystallized, disordered dichloromethane solvent molecules (*vide infra*). The structure was refined as a 4-component twin. The twin laws (-1, 0, 0.3; 0, -1, 0.3; 0, 0, 1), (0, 1, -0.3; 1, 0, -0.3; 0, 0, -1) and (0, -1, 0; -1, 0, 0; 0, 0, -1) which correspond to two-fold axes about the [0 0 1], [3 3 -1] and [1 -1 0] direct lattice directions, respectively, were detected with PLATON TwinRotMat. The fraction of overlapped reflections was calculated as about 40% for each of these three twin components. The refinement as a 4-component twin with HKLF 5 card significantly reduced the R-factor: The R<sub>1</sub> factor decreased by 0.061, with refined BASF factors of 0.279, 0.008 and 0.013, respectively. The crystal structure also shows the presence of highly disordered co-crystallized solvent dichloromethane molecules in voids present in the crystal packing. The PLATON SQUEEZE procedure was used to remove the electron density related to these highly disordered dichloromethane molecules. The residual electron density of 185 electrons/cell in a total potential solvent area volume of 1812 Å<sup>3</sup> (17.68% of the cell volume) can be attributed to 4.4 dichloromethane solvent molecules. The anisotropic thermal factors of non-H atoms were refined with the restraint cards ISOR\_\* and SIMU\_\* because of the low reflections/parameters ratio.

### **6@PrS[6]<sup>Me</sup>·BArF**

The asymmetric unit of the orthorhombic crystals of **6@PrS[6]<sup>Me</sup>·BArF** (*Cmca*) contains a half **6<sup>+</sup>@PrS[6]<sup>Me</sup>** host-guest complex, one BArF counter ion with 0.5 occupancy and approximately 3.575 co-crystallized, highly disordered dichloromethane solvent molecules (*vide infra*). The host-guest complex lies on a crystallographic two-fold axis. This symmetry axis passes through the centers of two opposite naphthalene rings of the **PrS[6]<sup>Me</sup>** host. The **6<sup>+</sup>** guest ion, located on the two-fold axis, show a statistical disorder of two methylene C atoms, while the C2 symmetric **PrS[6]<sup>Me</sup>** host exhibits no significant disorder. The BArF counter ion across a mirror plane and it is severely disordered. This was isotropically refined using geometrical restraints. The crystal structure also shows the presence of highly disordered, co-crystallized solvent dichloromethane molecules in voids present in the crystal packing. The PLATON SQUEEZE procedure was used to remove the electron density related to these highly disordered solvent molecules. The residual electron density of 1201 electrons/cell in a total potential solvent area volume of 8247 Å<sup>3</sup> (29.70% of the cell volume) can be attributed to 28.6 dichloromethane solvent molecules. The anisotropic thermal factors of the non-H atoms of the host-guest complex were refined with the restraint cards

ISOR and SIMU because of the low reflections/parameters ratio.

**Table S3.** Crystal data and structure refinement for prismarenes: **PrS[5]<sup>Et</sup>**, **PrS[5]<sup>nPr</sup>**, **PrS[6]<sup>Et</sup>** and **PrS[6]<sup>nPr</sup>**.

|                                                              | <b>PrS[5]<sup>Et</sup></b>                                                                                                                   | <b>PrS[5]<sup>nPr</sup></b>                                                                 | <b>PrS[6]<sup>Et</sup></b>                                                                                                                  | <b>PrS[6]<sup>nPr</sup></b>                                                                  |
|--------------------------------------------------------------|----------------------------------------------------------------------------------------------------------------------------------------------|---------------------------------------------------------------------------------------------|---------------------------------------------------------------------------------------------------------------------------------------------|----------------------------------------------------------------------------------------------|
| Empirical formula                                            | C <sub>75</sub> H <sub>80</sub> O <sub>10</sub> ,<br>C <sub>4</sub> H <sub>8</sub> O <sub>2</sub>                                            | C <sub>85</sub> H <sub>100</sub> O <sub>10</sub>                                            | C <sub>90</sub> H <sub>96</sub> O <sub>12</sub> ,<br>1.775 (CH <sub>2</sub> Cl <sub>2</sub> )                                               | C <sub>102</sub> H <sub>120</sub> O <sub>12</sub> ,<br>C <sub>7</sub> H <sub>8</sub>         |
| Formula weight                                               | 1229.49                                                                                                                                      | 1281.64                                                                                     | 1520.41                                                                                                                                     | 1630.11                                                                                      |
| Temperature (K)                                              | 100(2)                                                                                                                                       | 100(2)                                                                                      | 100(2)                                                                                                                                      | 100(2)                                                                                       |
| Wavelength (Å)                                               | 0.7                                                                                                                                          | 0.7                                                                                         | 0.7                                                                                                                                         | 0.7                                                                                          |
| Crystal system                                               | Triclinic                                                                                                                                    | Monoclinic                                                                                  | Triclinic                                                                                                                                   | Monoclinic                                                                                   |
| Space group                                                  | <i>P</i> -1                                                                                                                                  | <i>P</i> 2 <sub>1</sub> /c                                                                  | <i>P</i> -1                                                                                                                                 | <i>C</i> 2/c                                                                                 |
| Unit cell dimensions<br>(Å, °)                               | <i>a</i> = 16.42(8)<br><i>b</i> = 20.342(12)<br><i>c</i> = 21.545(17)<br>$\alpha$ = 83.045(14)<br>$\beta$ = 80.54(8)<br>$\gamma$ = 67.32(11) | <i>a</i> = 10.909(5)<br><i>b</i> = 34.548(3)<br><i>c</i> = 18.627(1)<br>$\beta$ = 91.334(6) | <i>a</i> = 19.356(8)<br><i>b</i> = 19.428(5)<br><i>c</i> = 21.732(4)<br>$\alpha$ = 96.664(4)<br>$\beta$ = 90.158(18)<br>$\gamma$ = 95.38(2) | <i>a</i> = 13.308(9)<br><i>b</i> = 30.108(18)<br><i>c</i> = 23.23(3)<br>$\beta$ = 104.36(16) |
| Volume (Å <sup>3</sup> )                                     | 6540(30)                                                                                                                                     | 7018(3)                                                                                     | 8081(4)                                                                                                                                     | 9017(14)                                                                                     |
| Z                                                            | 4                                                                                                                                            | 4                                                                                           | 4                                                                                                                                           | 4                                                                                            |
| $\rho_{\text{calcd}}$ (g/cm <sup>3</sup> )                   | 1.249                                                                                                                                        | 1.213                                                                                       | 1.25                                                                                                                                        | 1.201                                                                                        |
| $\mu$ (mm <sup>-1</sup> )                                    | 0.079                                                                                                                                        | 0.075                                                                                       | 0.191                                                                                                                                       | 0.076                                                                                        |
| F(000)                                                       | 2632                                                                                                                                         | 2760                                                                                        | 3226                                                                                                                                        | 3512                                                                                         |
| Reflections collected                                        | 96777                                                                                                                                        | 121074                                                                                      | 88777                                                                                                                                       | 20991                                                                                        |
| Indep. Reflections                                           | 31258                                                                                                                                        | 20580                                                                                       | 25663                                                                                                                                       | 6384                                                                                         |
| restraints/parameters                                        | 0/1705                                                                                                                                       | 0/867                                                                                       | 0/1861                                                                                                                                      | 84/569                                                                                       |
| GooF                                                         | 1.017                                                                                                                                        | 1.093                                                                                       | 1.027                                                                                                                                       | 1.036                                                                                        |
| Final <i>R</i> indices [ <i>I</i> > 2 $\sigma$ ( <i>I</i> )] | <i>R</i> <sub>1</sub> = 0.0962<br><i>wR</i> <sub>2</sub> = 0.2623                                                                            | <i>R</i> <sub>1</sub> = 0.0762<br><i>wR</i> <sub>2</sub> = 0.1869                           | <i>R</i> <sub>1</sub> = 0.0684<br><i>wR</i> <sub>2</sub> = 0.1895                                                                           | <i>R</i> <sub>1</sub> = 0.0912<br><i>wR</i> <sub>2</sub> = 0.2549                            |
| <i>R</i> indices (all data)                                  | <i>R</i> <sub>1</sub> = 0.145<br><i>wR</i> <sub>2</sub> = 0.3057                                                                             | <i>R</i> <sub>1</sub> = 0.0999<br><i>wR</i> <sub>2</sub> = 0.2038                           | <i>R</i> <sub>1</sub> = 0.0987<br><i>wR</i> <sub>2</sub> = 0.2133                                                                           | <i>R</i> <sub>1</sub> = 0.1362<br><i>wR</i> <sub>2</sub> = 0.2983                            |
| CCDC code                                                    | 2025594                                                                                                                                      | 2025589                                                                                     | 2025583                                                                                                                                     | 2025585                                                                                      |

**Table S4.** Crystal data and structure refinement for the prismarene host-guest complexes **7@PrS[5]<sup>Me-</sup>(BArF)<sub>2</sub>**, **10@PrS[5]<sup>Me-</sup>BArF**, and **6@PrS[6]<sup>Me-</sup>BArF**.

|                                | <b>7@PrS[5]<sup>Me-</sup>(BArF)<sub>2</sub></b>                                                                                                                                                     | <b>10@PrS[5]<sup>Me-</sup>BArF</b>                                                                                                                                                 | <b>6@PrS[6]<sup>Me-</sup>BArF</b>                                                                                                                                                    |
|--------------------------------|-----------------------------------------------------------------------------------------------------------------------------------------------------------------------------------------------------|------------------------------------------------------------------------------------------------------------------------------------------------------------------------------------|--------------------------------------------------------------------------------------------------------------------------------------------------------------------------------------|
| Empirical formula              | C <sub>65</sub> H <sub>60</sub> O <sub>10</sub> , C <sub>8</sub> H <sub>2</sub> ON <sub>2</sub> ,<br>2(C <sub>32</sub> H <sub>12</sub> BF <sub>24</sub> ),<br>0.7(CH <sub>2</sub> Cl <sub>2</sub> ) | C <sub>65</sub> H <sub>60</sub> O <sub>10</sub> ,<br>C <sub>4</sub> H <sub>12</sub> N, C <sub>32</sub> H <sub>12</sub> BF <sub>24</sub> ,<br>1.1(CH <sub>2</sub> Cl <sub>2</sub> ) | C <sub>78</sub> H <sub>72</sub> O <sub>12</sub> , C <sub>8</sub> H <sub>20</sub> N,<br>C <sub>32</sub> H <sub>12</sub> BF <sub>24</sub> ,<br>3.575(CH <sub>2</sub> Cl <sub>2</sub> ) |
| Formula weight                 | 2931.28                                                                                                                                                                                             | 20131.92                                                                                                                                                                           | 2498.44                                                                                                                                                                              |
| Temperature (K)                | 100(2)                                                                                                                                                                                              | 100(2)                                                                                                                                                                             | 100(2)                                                                                                                                                                               |
| Wavelength (Å)                 | 0.7                                                                                                                                                                                                 | 0.7                                                                                                                                                                                | 0.7                                                                                                                                                                                  |
| Crystal system                 | Monoclinic                                                                                                                                                                                          | Triclinic                                                                                                                                                                          | orthorhombic                                                                                                                                                                         |
| Space group                    | C 2/c                                                                                                                                                                                               | P -1                                                                                                                                                                               | C m c a                                                                                                                                                                              |
| Unit cell dimensions<br>(Å, °) | a = 38.56(3)<br>b = 17.306(2)<br>c = 22.875(7)<br>β = 120.862(15)                                                                                                                                   | a = 21.686(11)<br>b = 22.528(10)<br>c = 22.906(7)<br>α = 81.367(6)<br>β = 80.862(14)<br>γ = 68.83(3)                                                                               | a = 34.824(14)<br>b = 30.10(3)<br>c = 26.489(7)                                                                                                                                      |
| Volume (Å <sup>3</sup> )       | 13105(11)                                                                                                                                                                                           | 10251(8)                                                                                                                                                                           | 27770(30)                                                                                                                                                                            |
| Z                              | 4                                                                                                                                                                                                   | 4                                                                                                                                                                                  | 8                                                                                                                                                                                    |
| ρ calcd (g/cm <sup>3</sup> )   | 1.486                                                                                                                                                                                               | 1.317                                                                                                                                                                              | 1.195                                                                                                                                                                                |
| μ (mm <sup>-1</sup> )          | 0.158                                                                                                                                                                                               | 0.163                                                                                                                                                                              | 0.225                                                                                                                                                                                |
| F(000)                         | 5966                                                                                                                                                                                                | 4177                                                                                                                                                                               | 10289                                                                                                                                                                                |
| Reflections collected          | 121183                                                                                                                                                                                              | 82571                                                                                                                                                                              | 79718                                                                                                                                                                                |
| Indep. Reflections             | 19594                                                                                                                                                                                               | 23532                                                                                                                                                                              | 6110                                                                                                                                                                                 |
| restraints/parameters          | 0/ 998                                                                                                                                                                                              | 3486/2470                                                                                                                                                                          | 804/644                                                                                                                                                                              |
| Goof                           | 1.029                                                                                                                                                                                               | 1.197                                                                                                                                                                              | 1.607                                                                                                                                                                                |
| Final R indices                | R <sub>1</sub> = 0.0646                                                                                                                                                                             | R <sub>1</sub> = 0.1565                                                                                                                                                            | R <sub>1</sub> = 0.1760                                                                                                                                                              |
| [I > 2σ(I)]                    | wR <sub>2</sub> = 0.1691                                                                                                                                                                            | wR <sub>2</sub> = 0.3939                                                                                                                                                           | wR <sub>2</sub> = 0.4399                                                                                                                                                             |
| R indices (all data)           | R <sub>1</sub> = 0.0959<br>wR <sub>2</sub> = 0.202                                                                                                                                                  | R <sub>1</sub> = 0.2416<br>wR <sub>2</sub> = 0.4607                                                                                                                                | R <sub>1</sub> = 0.1959<br>wR <sub>2</sub> = 0.4581                                                                                                                                  |
| CCDC code                      | 2050614                                                                                                                                                                                             | 2050617                                                                                                                                                                            | 2050618                                                                                                                                                                              |

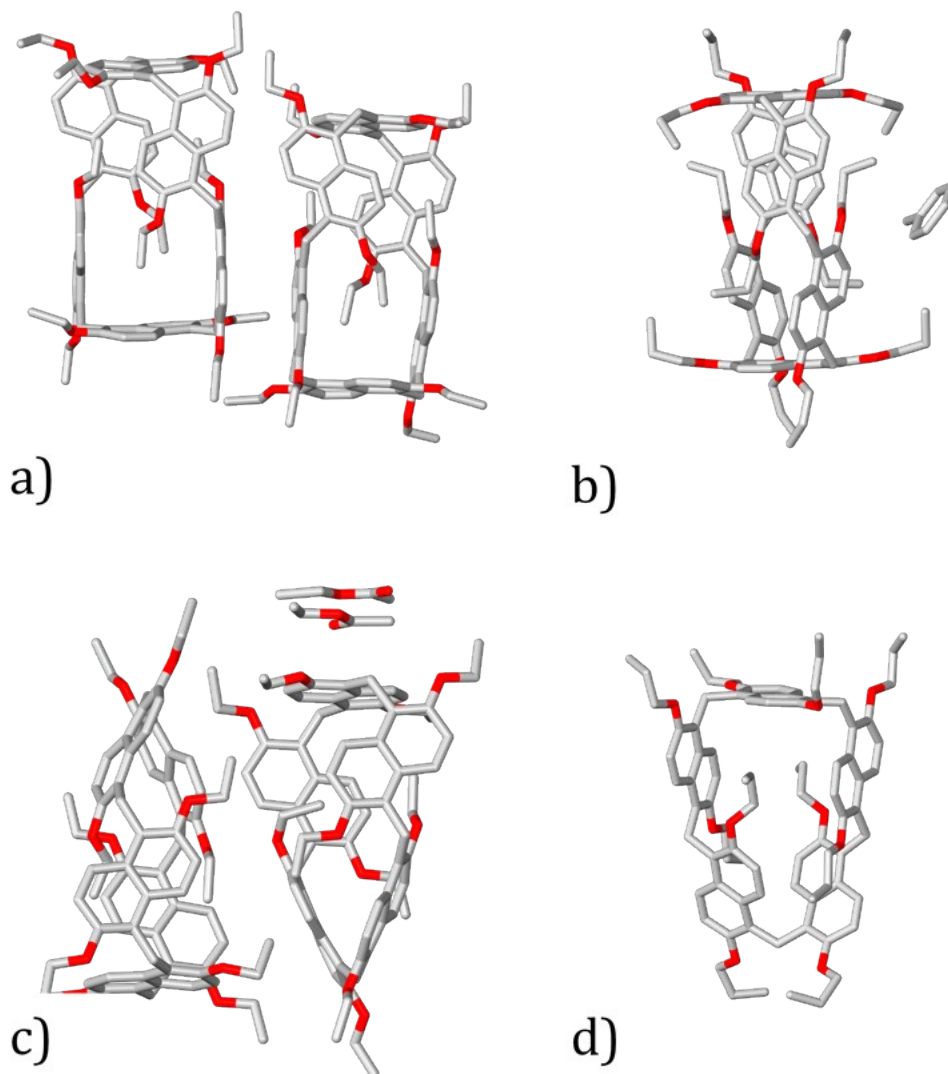

**Figure S95.** (a-d) Stick representation of the asymmetric units of a)  $\text{PrS}[6]^{\text{Et}}$ , b)  $\text{PrS}[6]^{\text{nPr}}$ , c)  $\text{PrS}[5]^{\text{Et}}$  and d)  $\text{PrS}[5]^{\text{nPr}}$ . Hydrogen atoms and one orientation of the disordered alkyl groups and toluene molecule are omitted for clarity. For  $\text{PrS}[6]^{\text{nPr}}$  the entire molecule generated by a crystallographic two-fold axis is shown.

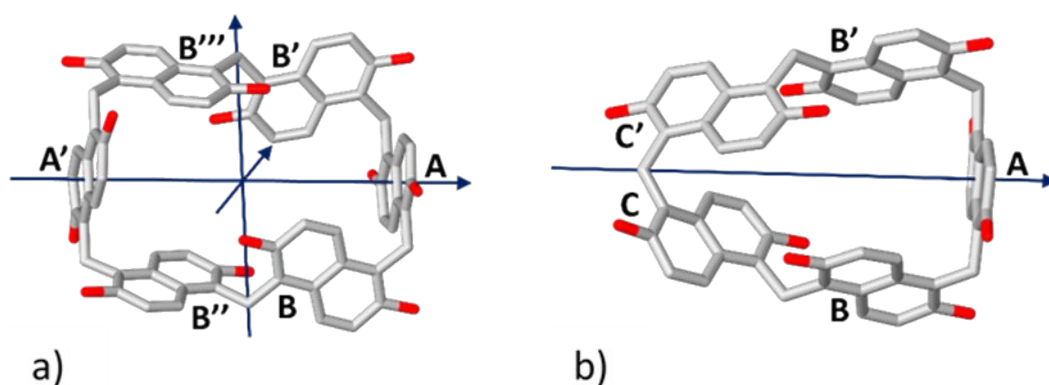

**Figure S96.** (a-b) Stick representation of (a) the  $C_2$  symmetric  $\text{PrS}[5]^{\text{R}}$  and (b) the  $D_2$  symmetric  $\text{PrS}[6]^{\text{R}}$  scaffolds. The pseudo two-fold symmetry axes are represented with arrows. The alkyl groups are omitted for clarity.

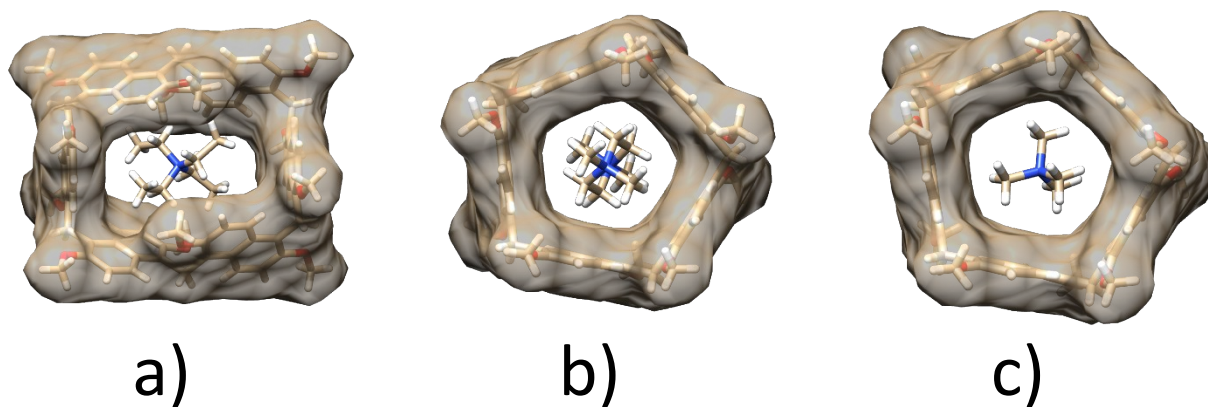

**Figure S97.** X-ray structural models of the host-guest complexes  $6^+@PrS[6]^{Me}$ ,  $7^{2+}@PrS[5]^{Me}$  and  $10^+@PrS[5]^{Me}$ . The transparent van der Waals surface of the host is shown to illustrate the effective cavities of the prismarens. The counter-ions, solvent and disordered guest atoms are omitted for clarity.

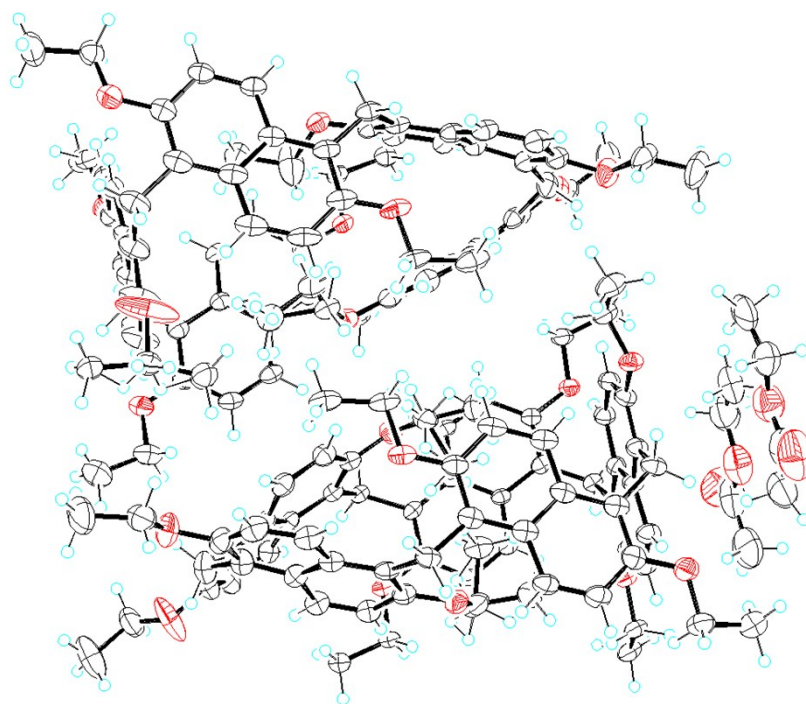

**Figure S98.** ORTEP drawing of  $PrS[5]^{Et}$  (thermal ellipsoids at the 50% probability level).

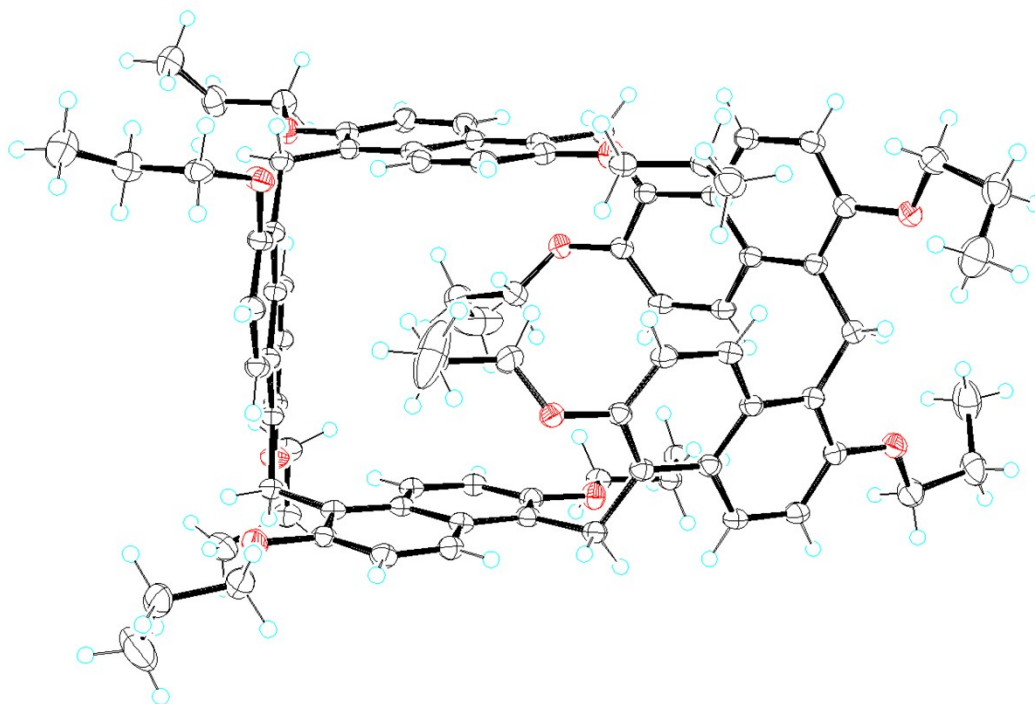

**Figure S99.** ORTEP drawing of **PrS[5]<sup>nPr</sup>** (thermal *ellipsoids* at the 50% probability level).

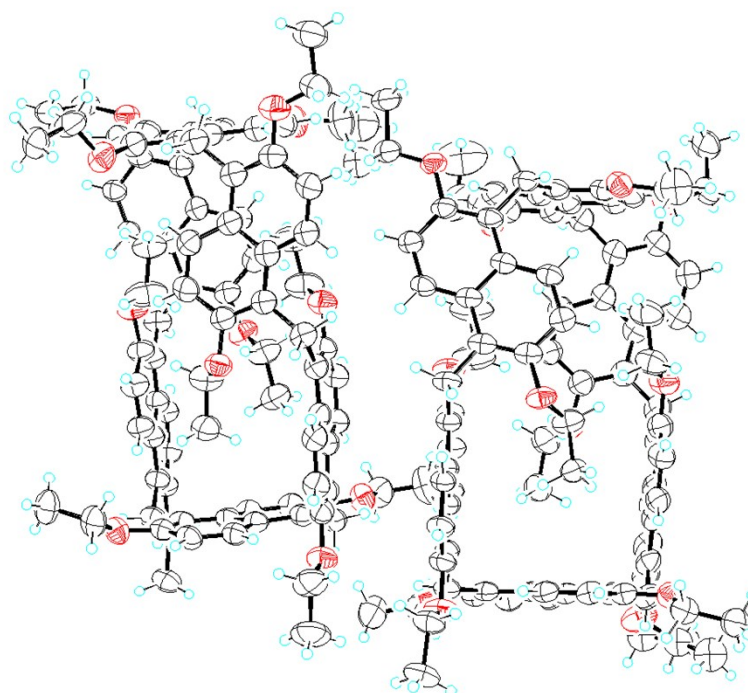

**Figure S100.** ORTEP drawing of **PrS[6]<sup>Et</sup>** (thermal *ellipsoids* at the 50% probability level).

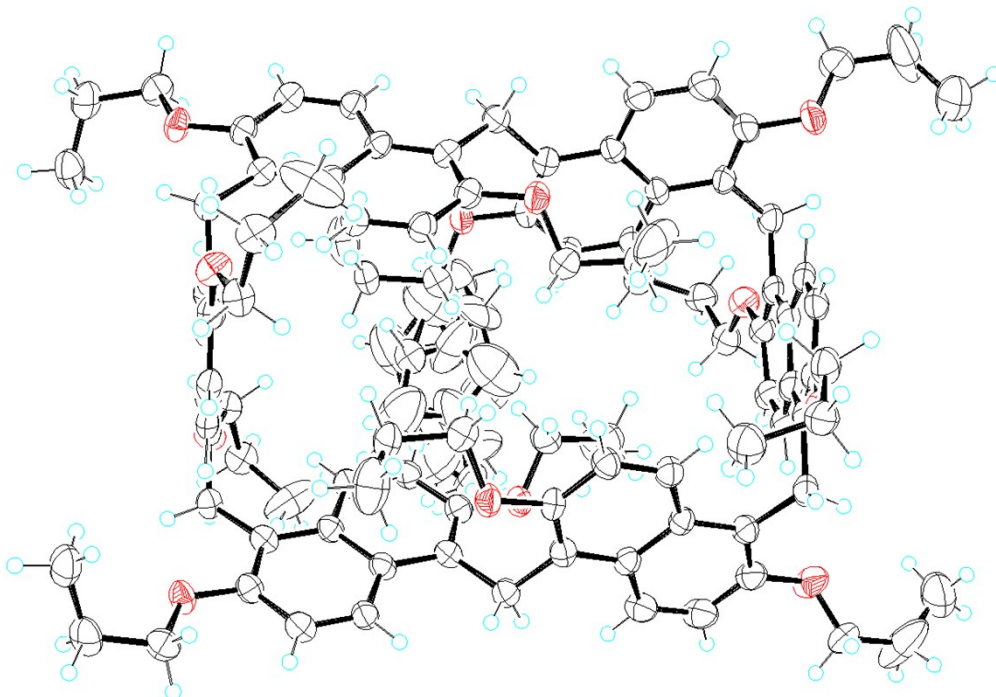

**Figure S101.** ORTEP drawing of  $\text{PrS}[6]^{nPr}$  (thermal ellipsoids at the 50% probability level).

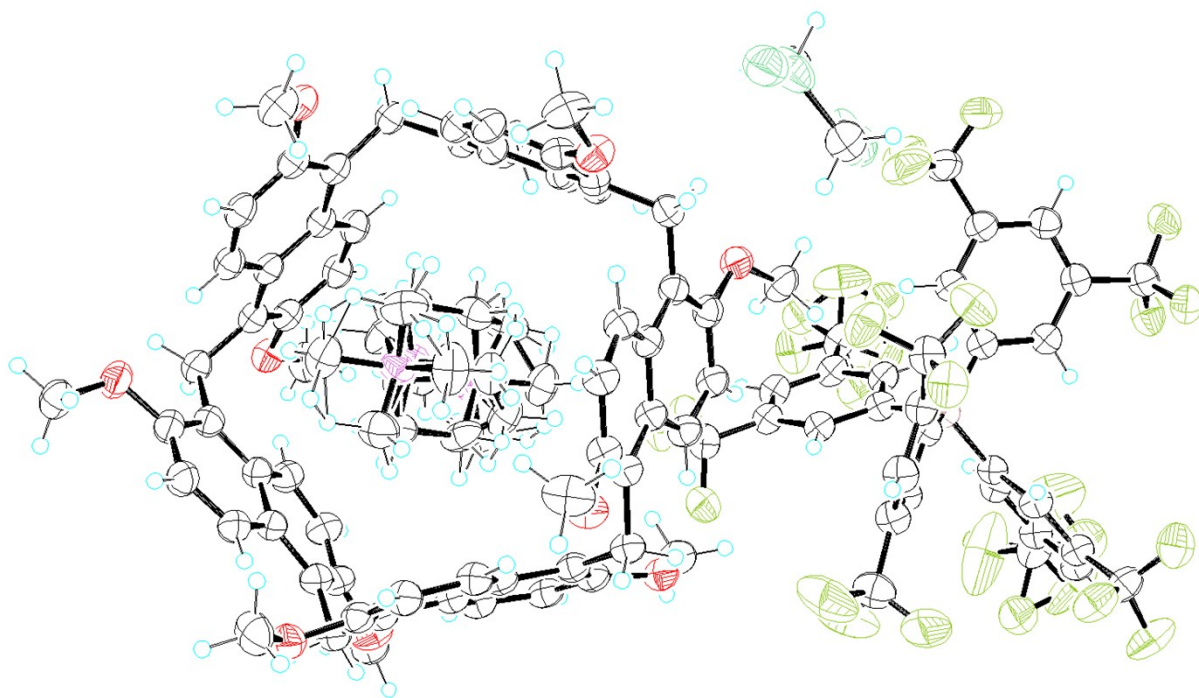

**Figure S102.** ORTEP drawing of  $7@PrS[5]^{Me} \cdot (\text{BARF})_2$  (thermal ellipsoids at the 50% probability level).

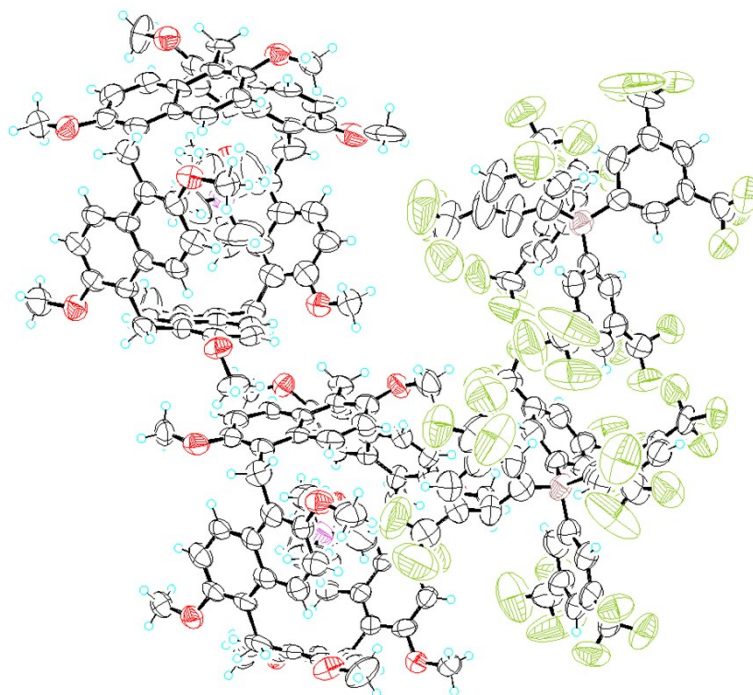

**Figure S103.** ORTEP drawing of **10@PrS[5]<sup>Me</sup>-BArF** (thermal ellipsoids at the 50% probability level).

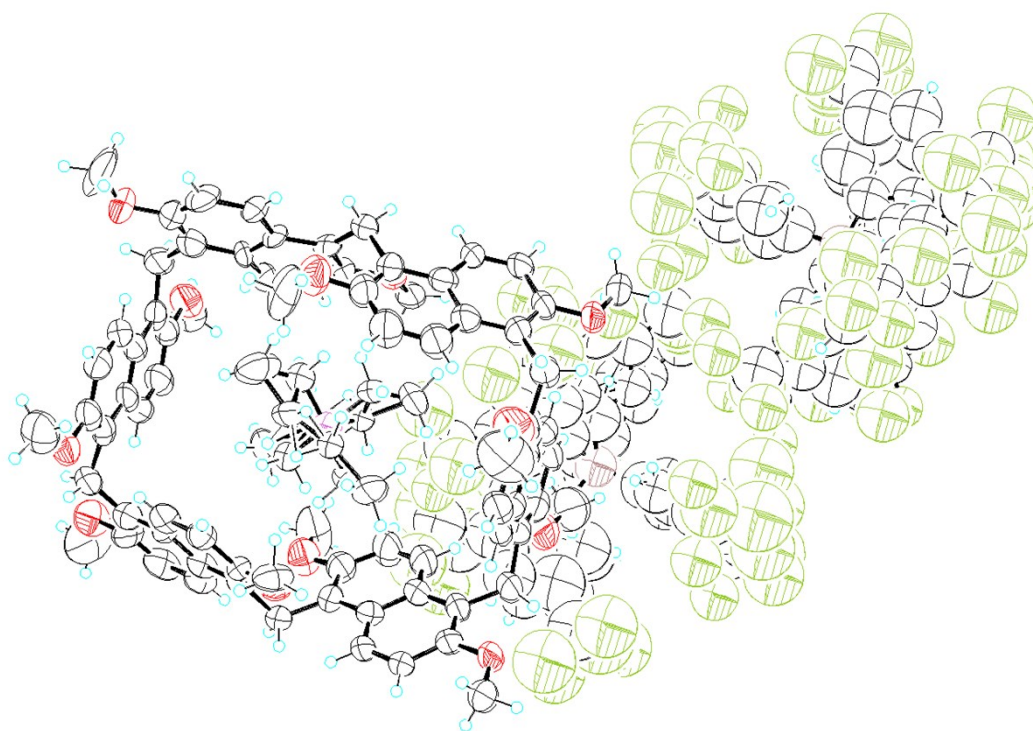

**Figure S104.** ORTEP drawing of **6@PrS[6]<sup>Me</sup>-BArF** (thermal ellipsoids at the 50% probability level).



**Table S5.** Dihedral canting angles between the naphthalene planes and the mean planes of the bridging methylene carbon atoms, observed in the crystal structures of **PrS[5]<sup>R</sup>** and **PrS[6]<sup>R</sup>**. Considering an arbitrary “up-side” of the macro-ring, dihedral angles greater than 90° correspond to outward orientations of the plane with respect to this up-side and vice-versa. For the labelling scheme see Figure S89.

|                                           | <b>A</b>  | <b>B</b>  | <b>B'</b> | <b>C</b>   | <b>C'</b> |
|-------------------------------------------|-----------|-----------|-----------|------------|-----------|
| <b>PrS[5]<sup>Et</sup></b>                | 90.13(8)  | 71.13(8)  | 108.30(8) | 140.82(13) | 39.15(13) |
| *                                         | 90.35(9)  | 70.78(8)  | 110.59(8) | 141.81(13) | 36.77(14) |
| <b>PrS[5]<sup>nPr</sup></b>               | 91.03(3)  | 65.89(3)  | 113.58(3) | 139.93(3)  | 41.14(3)  |
| <b>α-PrS[5]<sup>Me</sup></b>              | 95.56(2)  | 63.97(2)  | 108.11(2) | 132.35(2)  | 56.37(4)  |
| <b>β-PrS[5]<sup>Me</sup></b>              | 94.36(1)  | 65.28(2)  | 109.53(2) | 132.37(1)  | 53.68(1)  |
| <b>γ-PrS[5]<sup>Me</sup></b>              | 90.00(2)  | 99.72(2)  | 80.28(2)  | 60.32(2)   | 119.68(2) |
| <b>7<sup>2+</sup>@PrS[5]<sup>Me</sup></b> | 90.00(4)  | 86.80(4)  | 93.20(4)  | 91.29(4)   | 88.71(4)  |
| <b>10<sup>+</sup>@PrS[5]<sup>Me</sup></b> | 89.88(21) | 89.00(19) | 90.88(17) | 92.97(16)  | 89.41(18) |
| *                                         | 89.43(21) | 89.13(19) | 90.45(17) | 91.30(22)  | 89.47(20) |

|                                          | <b>A</b> | <b>B</b> | <b>B'</b> | <b>B''</b> | <b>B'''</b> | <b>A'</b> |
|------------------------------------------|----------|----------|-----------|------------|-------------|-----------|
| <b>PrS[6]<sup>Et</sup></b>               | 90.28(5) | 43.41(5) | 128.30(5) | 137.97(6)  | 39.24(6)    | 88.46(5)  |
| *                                        | 90.00(5) | 37.58(6) | 136.00(4) | 140.14(6)  | 41.88(6)    | 89.48(5)  |
| <b>PrS[6]<sup>nPr</sup></b>              | 90.00(8) | 42.60(8) | 137.40(8) | 135.47(8)  | 44.53(8)    | 90.00(8)  |
| <b>6<sup>+</sup>@PrS[6]<sup>Me</sup></b> | 90.0(3)  | 58.1(3)  | 121.9(3)  | 122.9(3)   | 57.1(3)     | 90.0(3)   |

\* Dihedral angles of the second crystallographic independent molecule.

**Table S6.** Interior dihedral angles between the naphthalene planes observed in the crystal structures of **PrS[5]<sup>R</sup>** and **PrS[6]<sup>R</sup>**. For the labelling scheme see Figure S89

|                                           | A-B       | B-C        | C-C'      | C'-B'      | B'-A      |
|-------------------------------------------|-----------|------------|-----------|------------|-----------|
| <b>PrS[5]<sup>Et</sup></b>                | 91.62(8)  | 101.92(13) | 46.54(15) | 100.70(13) | 94.84(8)  |
| *                                         | 90.56(9)  | 109.97(14) | 43.61(14) | 98.07(14)  | 93.32(8)  |
| <b>PrS[5]<sup>nPr</sup></b>               | 94.87(4)  | 94.90(3)   | 50.21(4)  | 98.70(4)   | 91.88(5)  |
| <b>α-PrS[5]<sup>Me</sup></b>              | 91.61(2)  | 100.32(3)  | 64.74(3)  | 108.46(3)  | 98.06(2)  |
| <b>β-PrS[5]<sup>Me</sup></b>              | 89.82(2)  | 101.94(2)  | 65.56(3)  | 101.62(2)  | 101.55(2) |
| <b>γ-PrS[5]<sup>Me</sup></b>              | 111.36(2) | 90.86(2)   | 102.34(2) | 90.86(2)   | 111.36(2) |
| <b>7<sup>2+</sup>@PrS[5]<sup>Me</sup></b> | 107.05(5) | 110.48(5)  | 104.62(5) | 110.48(5)  | 107.05(5) |
| <b>10<sup>+</sup>@PrS[5]<sup>Me</sup></b> | 111.0(2)  | 103.1(3)   | 113.7(3)  | 102.0(3)   | 110.1(3)  |
| *                                         | 113.5(4)  | 102.1(3)   | 110.2(2)  | 110.5(3)   | 103.6(3)  |

|                                          | A-B       | B-B''     | B''-A'    | A'-B'''   | B'''-B'   | B'-A      |
|------------------------------------------|-----------|-----------|-----------|-----------|-----------|-----------|
| <b>PrS[6]<sup>Et</sup></b>               | 91.63(7)  | 85.31(7)  | 93.76(7)  | 90.26(6)  | 89.44(7)  | 95.58(6)  |
| *                                        | 91.58(7)  | 77.42(8)  | 91.13(7)  | 95.31(6)  | 85.77(6)  | 90.70(7)  |
| <b>PrS[6]<sup>nPr</sup></b>              | 94.97(17) | 86.54(17) | 96.23(16) | 93.56(17) | 83.77(16) | 94.97(17) |
| <b>6<sup>+</sup>@PrS[6]<sup>Me</sup></b> | 105.2(3)  | 107.8(3)  | 103.1(3)  | 103.1(3)  | 107.8(3)  | 105.2(3)  |

\* Dihedral angles of the second crystallographic independent molecule.

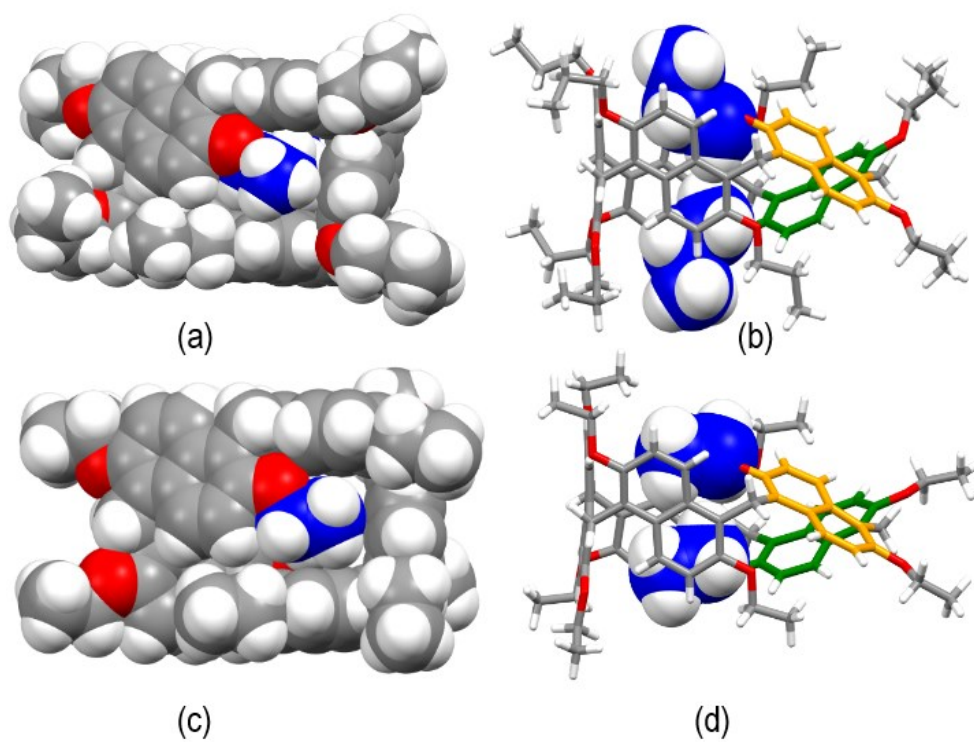

**Figure S105.** Self-filling of the cavities of of prism[5]arenes as obtained by X-ray structures. (a and b) Different views of **PrS[5]<sup>nPr</sup>**. (c and d) Different views of **PrS[5]<sup>Et</sup>**.

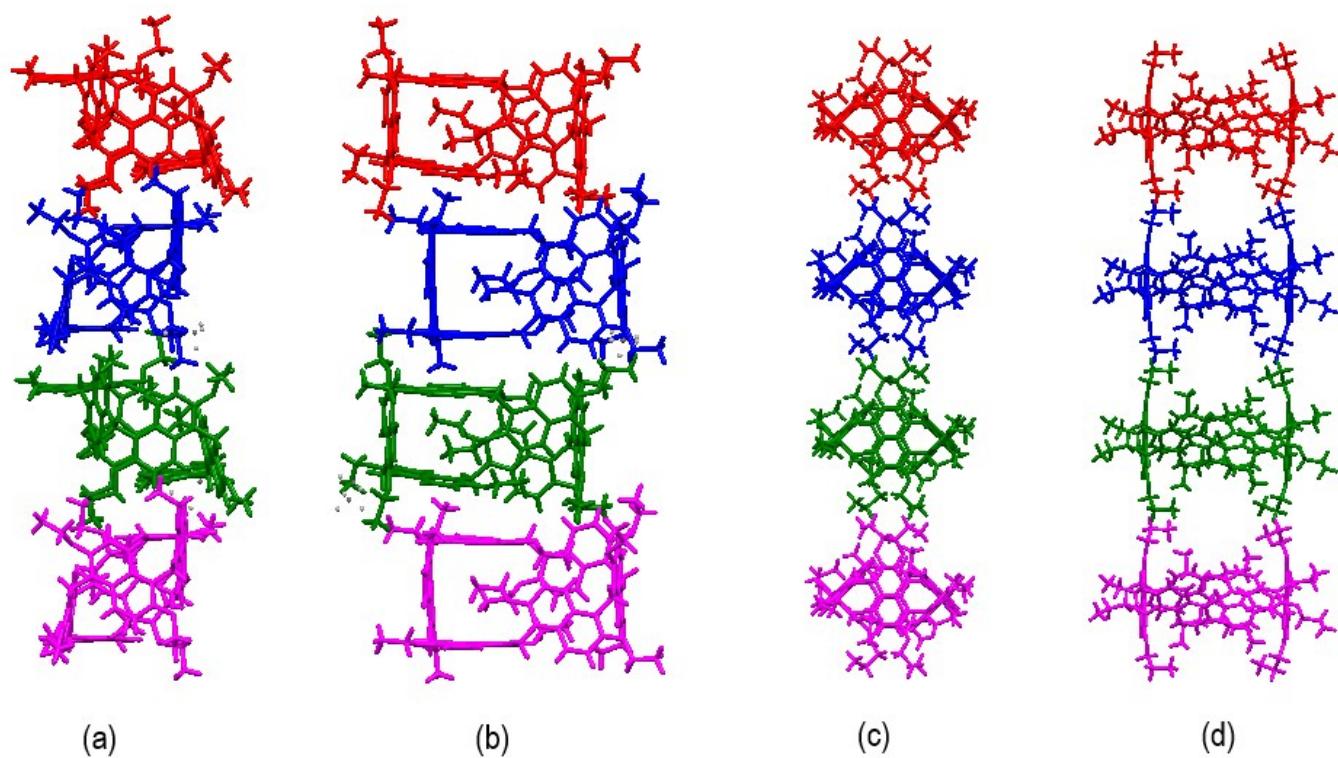

**Figure S106.** (a and b) Significant portion of the crystal packing of **PrS[5]<sup>Et</sup>** viewed along the *a*-axis. (c and d) Significant portion of the crystal packing of **PrS[5]<sup>nPr</sup>** viewed along the *a*-axis.

## Potential void volumes of prismatic macro-cycles.

In order to compare the potential cavity of the hosts for complex formation, the surface and volume of the ideal prismatic solids enclosed by the aromatic walls of some strictly related cyclophanes: pillar[5]arene, pillar[6]arene, prism[5]arene, prism[6]arene, and pagoda[4]arene were evaluated (Figure S99). The geometrical parameters used for these calculations were obtained from the CCDC database as mean values of distances and angles observed in the X-ray structures containing the relevant monomeric unit. The volumes of the ideal prismatic solids enclosed by the macrocycles (**V**) were evaluated from the areas of the polyhedron bases (**B**) and the geometric heights (**h**). The potential contact surface areas (**A**) were calculated as the total area of the rectangular prism faces. The opening of the cavity of these macrocycles (Figure S99) was evaluated as the area of the polyhedron base, **B**, namely, pentagon for the prism[5]arene and pillar[5]arene, square for the pagoda[4]arene, and hexagon for the prism[6]arene and pillar[6]arene. The opening of the cavity is strictly related first to the number of monomers in the macrocycle and then to the number of fused-rings in the aromatic walls. Thus, the prism[6]arene (52.4 Å<sup>2</sup>) shows a wider cavity than the pillar[6]arene (39.1 Å<sup>2</sup>) and the prism[5]arene shows a wider cavity than pillar[5]arene (27.3 vs 19.6 Å<sup>2</sup>) and pagoda[4]arene (19.1 Å<sup>2</sup>). The depth of the cavity, evaluated by the geometric height of the prism (**h**), is related to the number of fused-rings in the aromatic walls. Thus the order is pagodarene (10.78 Å), prismarene (9.35 Å), and pillararene (7.76 Å). As a result, the volumes of the cavities of these macrocycles clearly indicate that primarenes have bigger cavities than the corresponding pillararenes: prism[6]arene (490 Å<sup>3</sup>) vs. pillar[6]arene (303 Å<sup>3</sup>); prism[5]arene (255 Å<sup>3</sup>) vs. pillar[5]arene (152 Å<sup>3</sup>). The tetrameric pagoda[4]arene (206 Å<sup>3</sup>) lie between the two pentamers, prism[5]arene and pillar[5]arene. Another important geometric feature is the potential contact surface areas (**A**) derived from the total area of the rectangular prism faces. The prism[6]arene (252 Å<sup>2</sup>) shows the highest surface area, while the prism[5]arene (186 Å<sup>2</sup>), pagoda[4]arene (188 Å<sup>2</sup>) and pillar[6]arene (181 Å<sup>2</sup>) have comparable values. Finally, the pillar[5]arene (131 Å<sup>2</sup>) exhibits the smallest potential contact area.

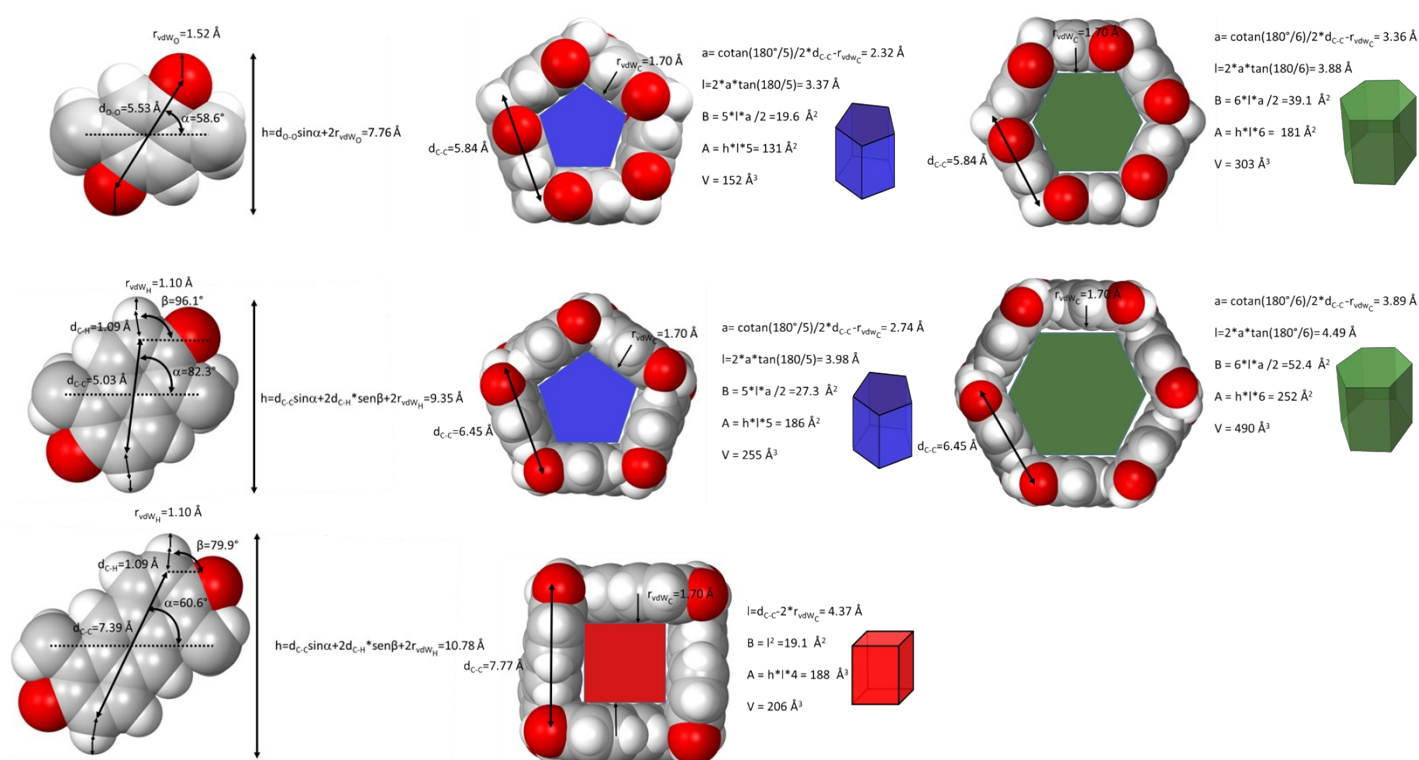

**Figure S107.** Comparison of the potential void volume in prismatic macro-cycles: Pillarenes, prismarenes and pagodarenes.

## Comparison between DFT and Solid-State Structures of PrS[5]<sup>nPr</sup> and PrS[6]<sup>nPr</sup>

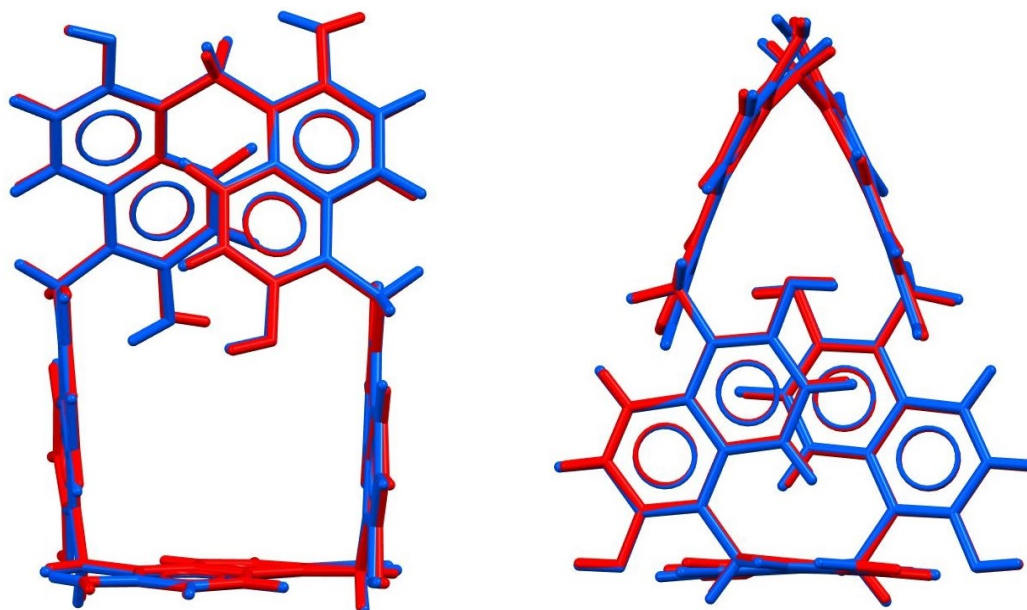

**Figure S108.** Superimposition of the solid-state structure (red) and DFT minimized structure (blue) of PrS[5]<sup>nPr</sup> (rmsd = 0.07 Å). Propyl groups are omitted for clarity

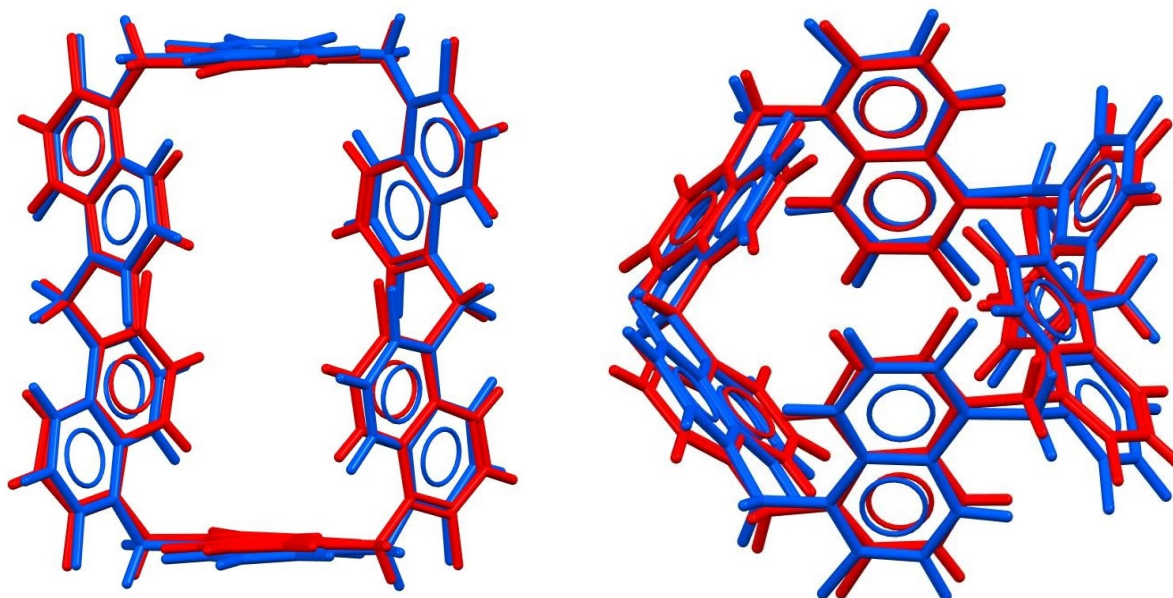

**Figure S109.** Superimposition of the solid-state structure (red) and DFT minimized structure (blue) of PrS[6]<sup>nPr</sup> (rmsd = 0.34 Å).

## HPLC analysis of the cyclocondensation kinetics

All samples were analyzed on 250 x 4.6 mm Waters Spherisorb® 10µm Silica using a gradient of hexane, dichloromethane and acetonitrile as the mobile phase at a flow rate of 1.5 ml/min and injecting 20µL of 10µg/mL solution of reaction mixture in dichloromethane. The gradient used for separation start to mixture 1:1 v:v of hexane-dichloromethane and in 30 minutes was added 5% of acetonitrile. The retention times are as follows: **PrS[5]<sup>Et</sup>** (12.6 min) and **PrS[6]<sup>Et</sup>** (21.0 min).

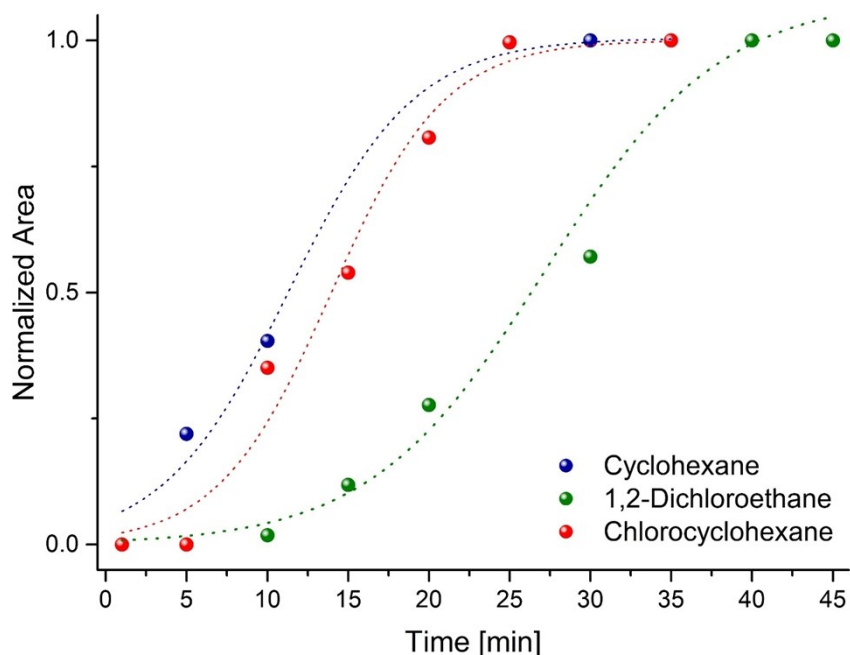

**Figure S110:** Relationship between time and **PrS[6]<sup>Et</sup>** concentration in the cyclocondensation reactions of **4b** in different solvents.

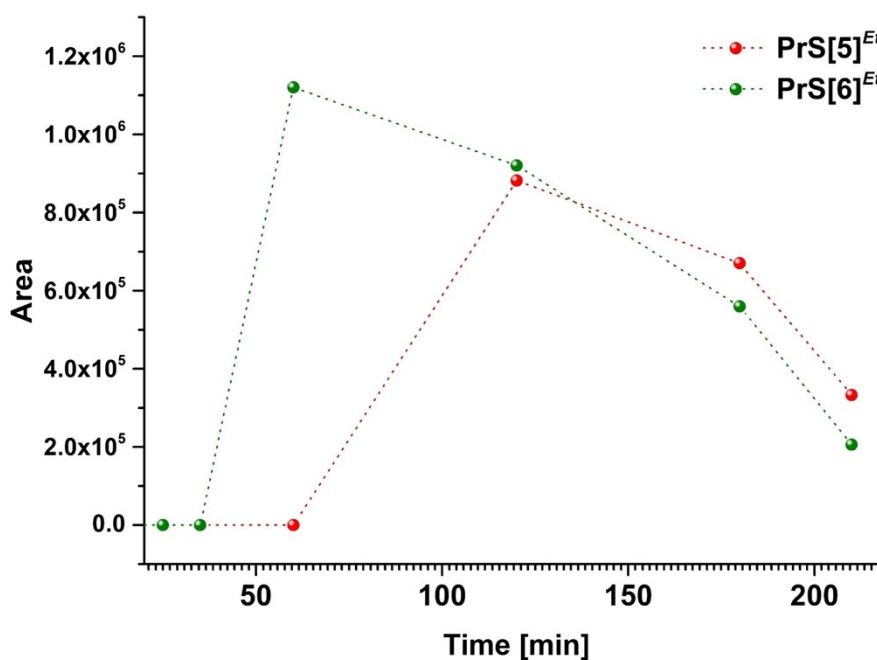

**Figure S111:** Relationship between time and products distribution in the cyclocondensation reactions of **4b** with templating agent **5<sup>2+</sup>·2I<sup>-</sup>**.
